# Supplementary material
Source: Research Square preprint supplement (doi:10.21203/rs.3.rs-9056648/v1)

**Supplementary Appendix 5**

**Additional Figures and legends of Subgroup Analyses**

Abbreviations: TC: total cholesterol; HDL: high density lipoprotein cholesterol; LDL: low density lipoprotein cholesterol; TG: total triglyceride; HbA1c: hemoglobin A1c; BMI: body mass index; CI: credible interval.

**Legends (universal)**

Forest plots: The forest plots present mean value, 95% CI, and weight for each included study, while the pooled effect size and heterogeneity (I2) were also generated. Size of the black diamonds is proportional to the observed effect size, the gray squares represent weight of the trial, and the black lines show the 95% CI. The dark blue hollow diamonds at the bottom of each subgroup represent the polled effect. In this combined meta-analysis, both random effects model and fixed effects model were applied for each analyzing group and sub-group, while only results based on random effects model were presented in forest plots.

NOTE: Results using random effects model (Doz-Lewbel method) were firstly performed for all variables to identify the estimation of heterogeneity (a "Pragmatic Randomness" strategy). For subgroups with low heterogeneity (I2 ≤ 30%), fixed effects model (Instrumental-Variable method) were additionally and respectively performed. If all of the subgroups of one index all showed low heterogeneity, only forest plots of fixed effects model were presented. Subgroups with only one study included were ignored for such.

1. Case-control designed studies
   1. Weight
      1. By observation, fixed effects model


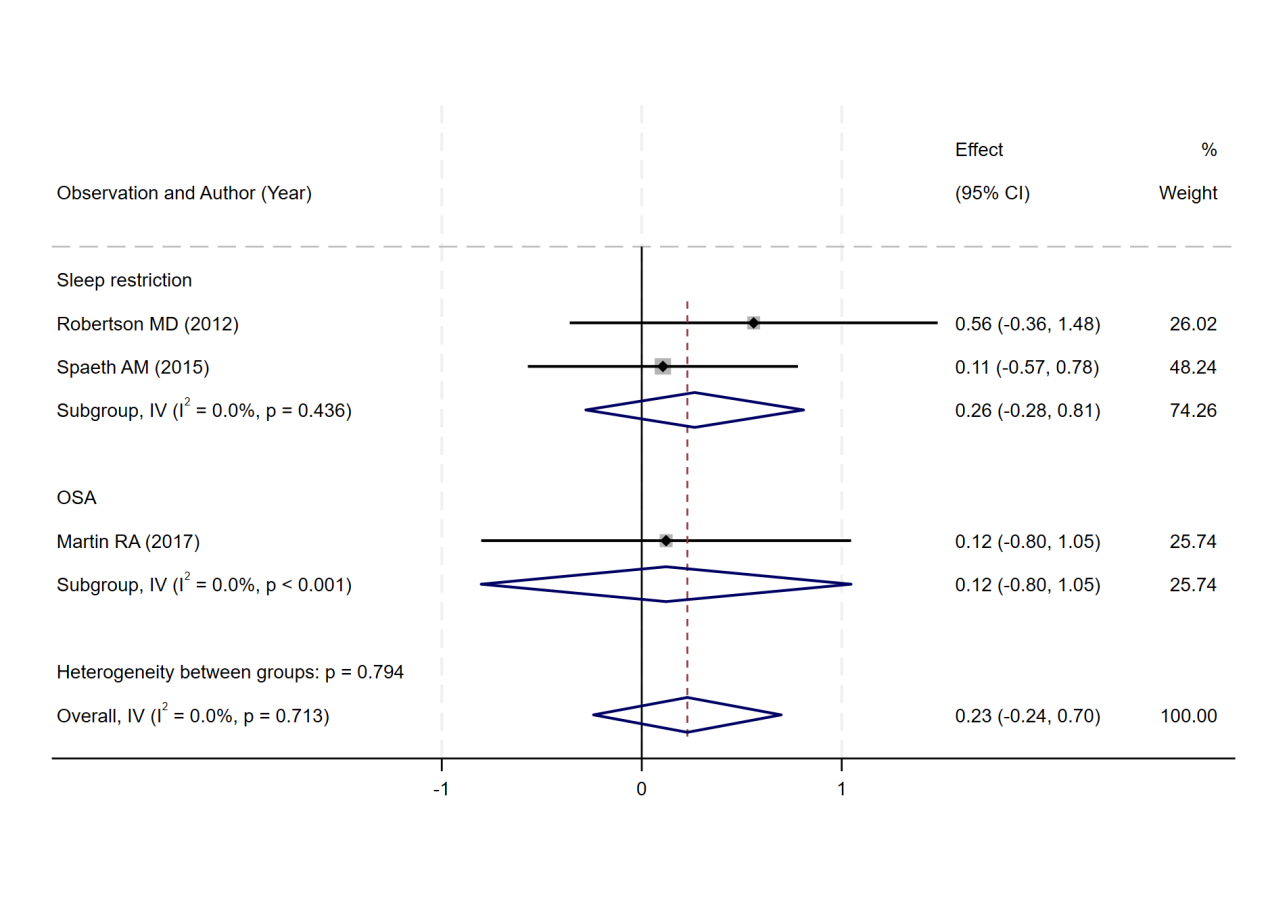


- - 1. By region, fixed effects model


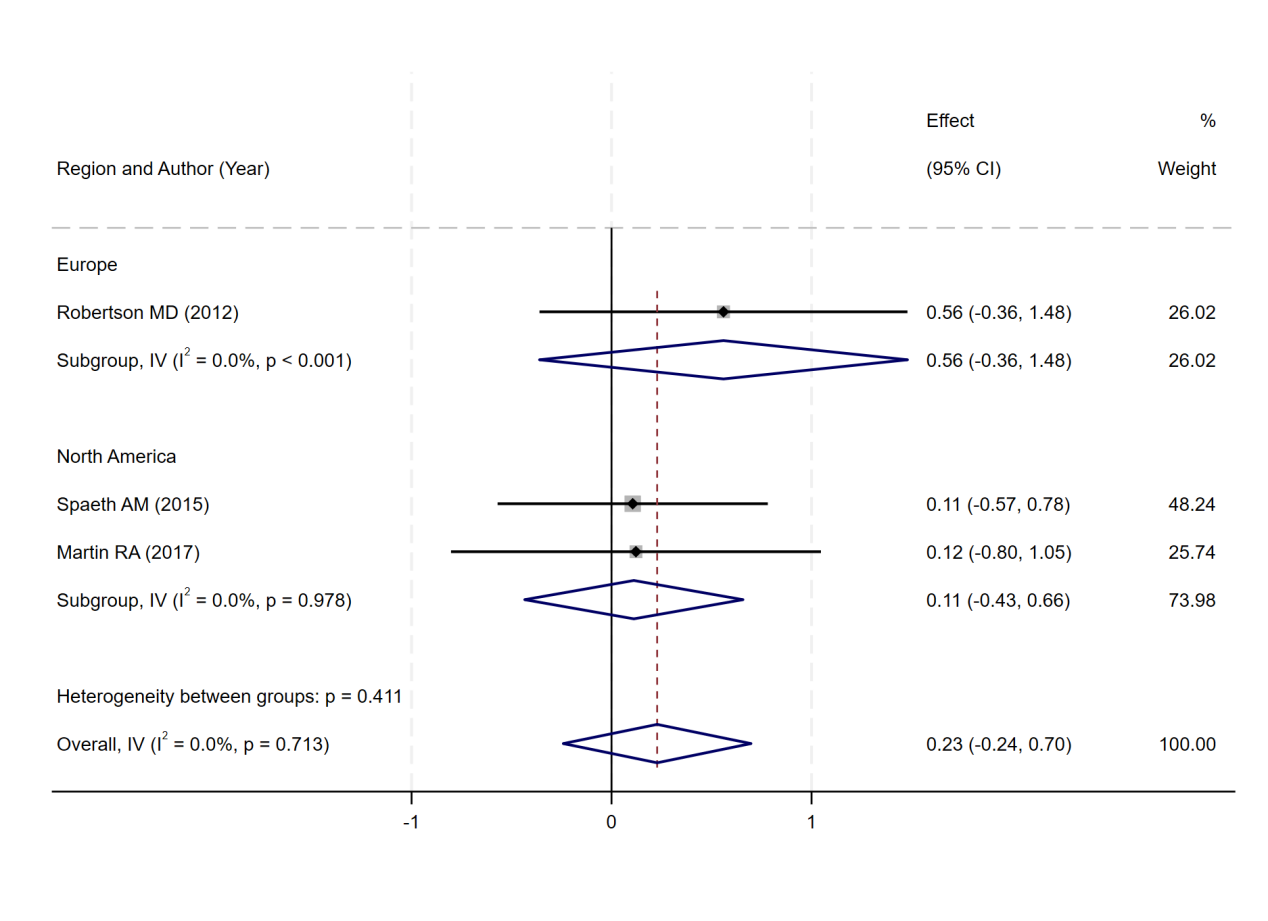


- - 1. By gender ratio (N(male)/N(female) > 1.5 = 1, ≤ 1.5 = 0), fixed effects model


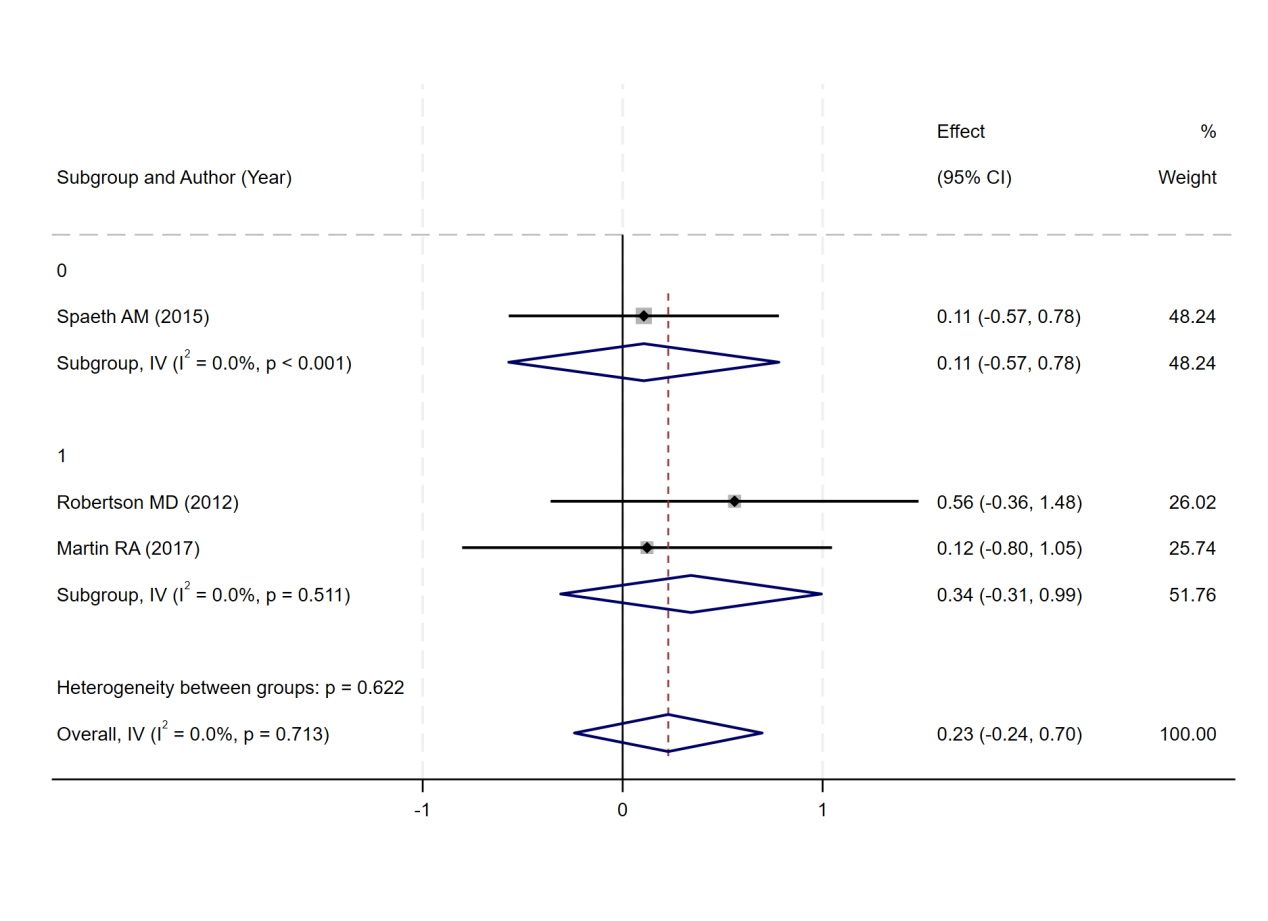


- - 1. By age range (mean value ≤ 30 = 0, mean > 30 = 1), fixed effects model


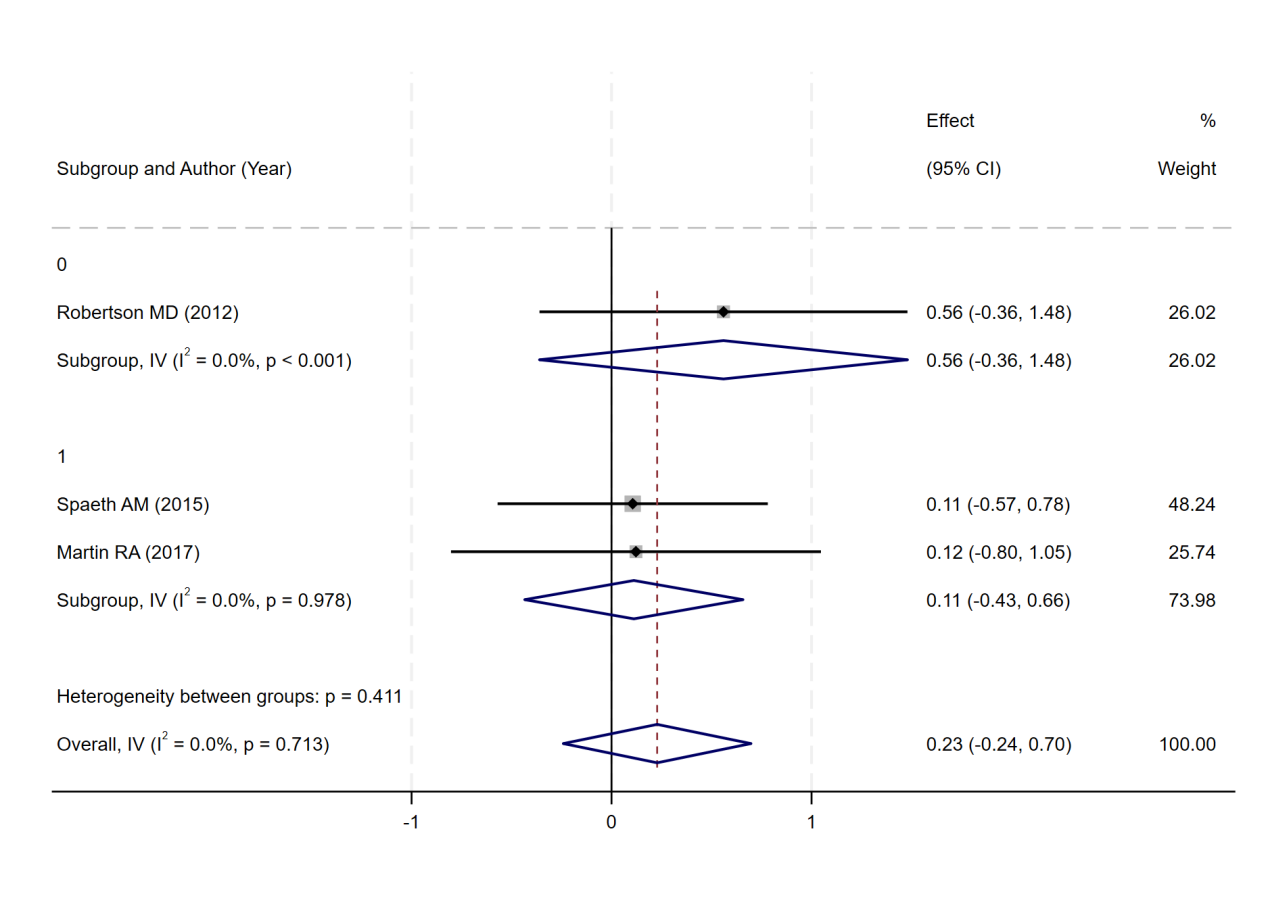


- 1. BMI
     1. By observation, random effects model


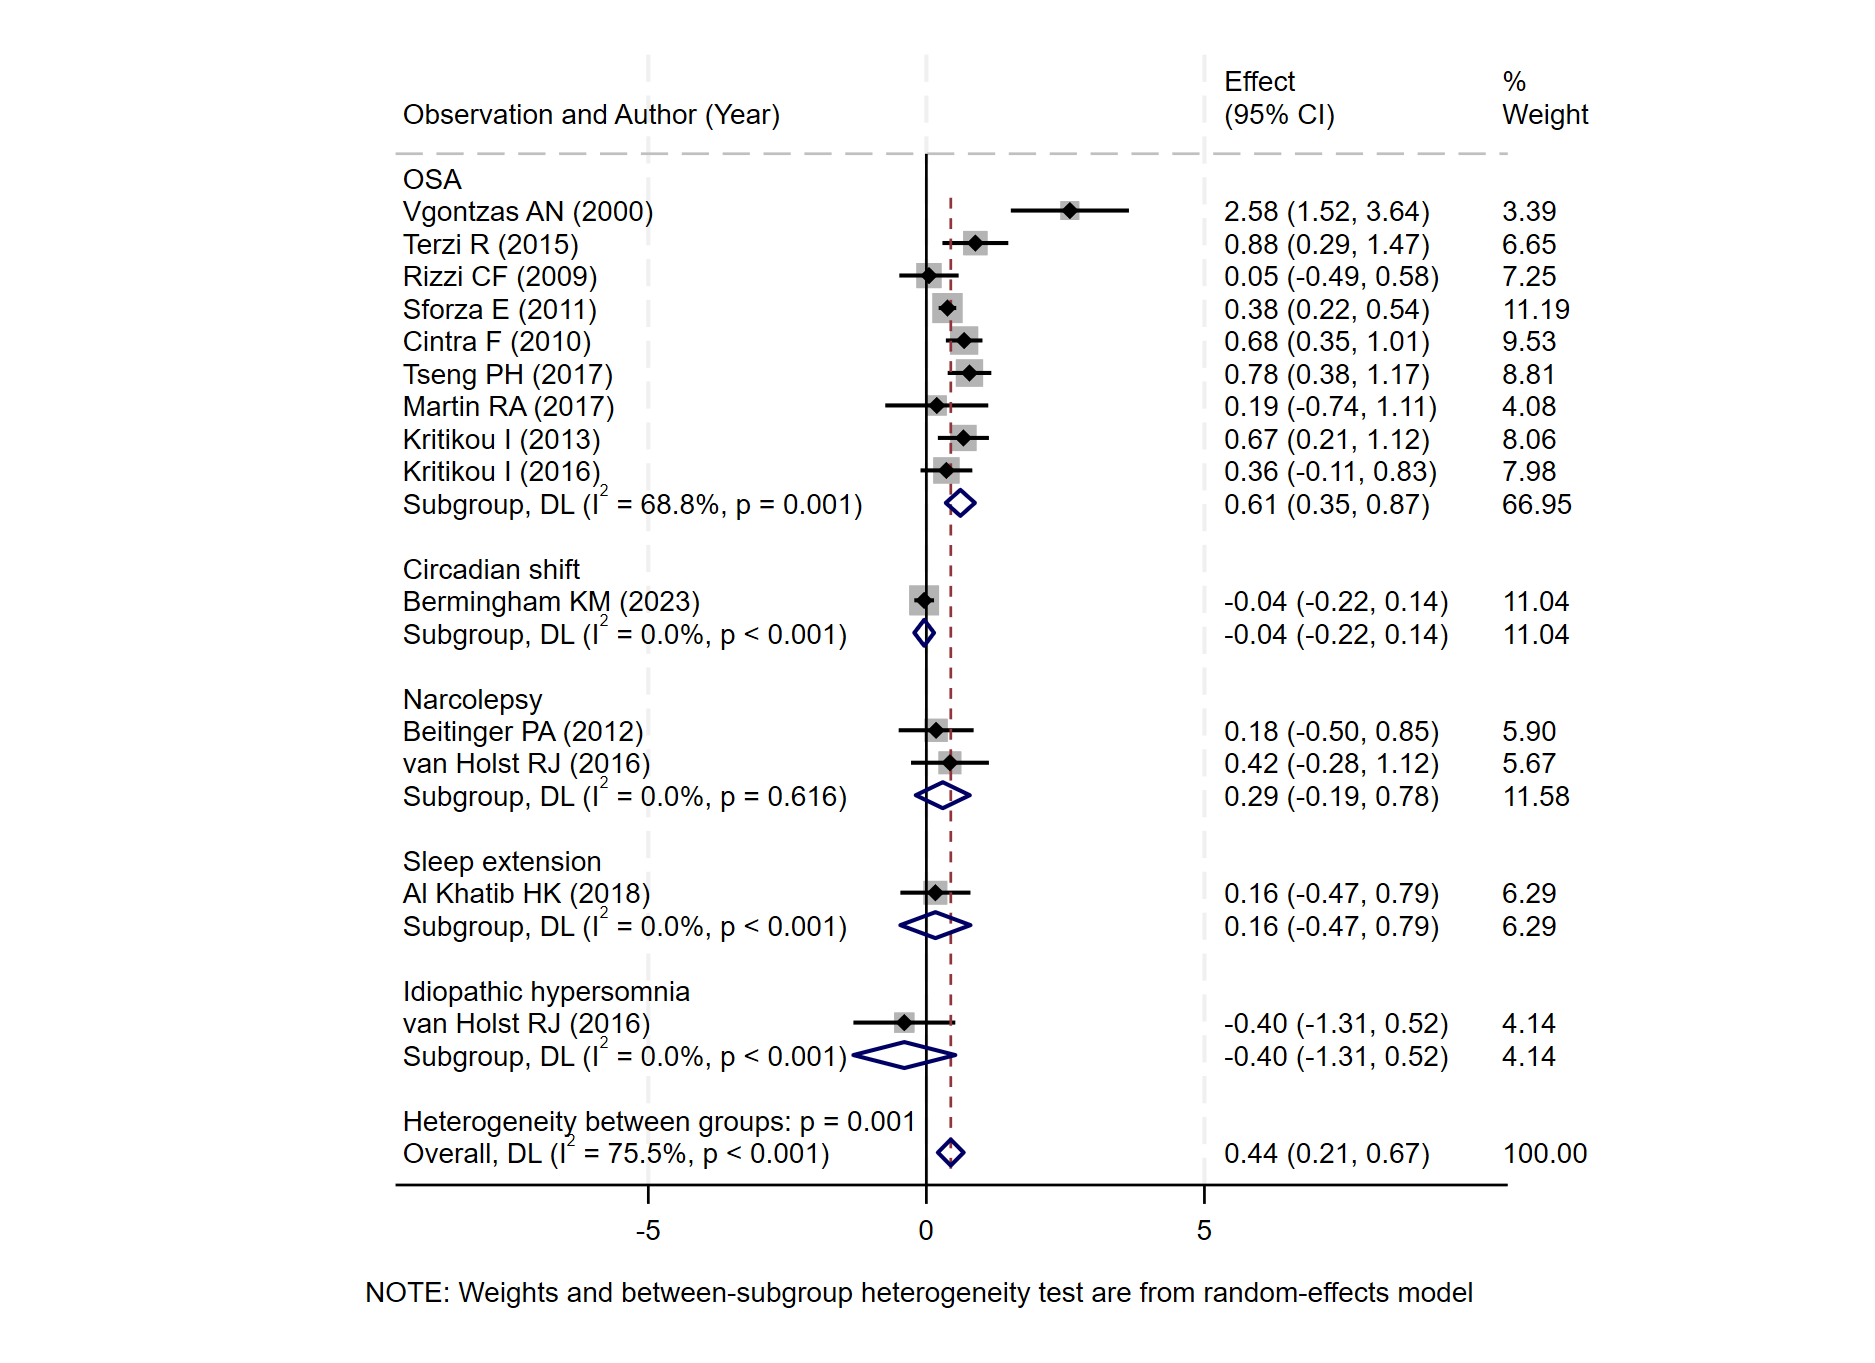


By observation - Narcolepsy, fixed effects model


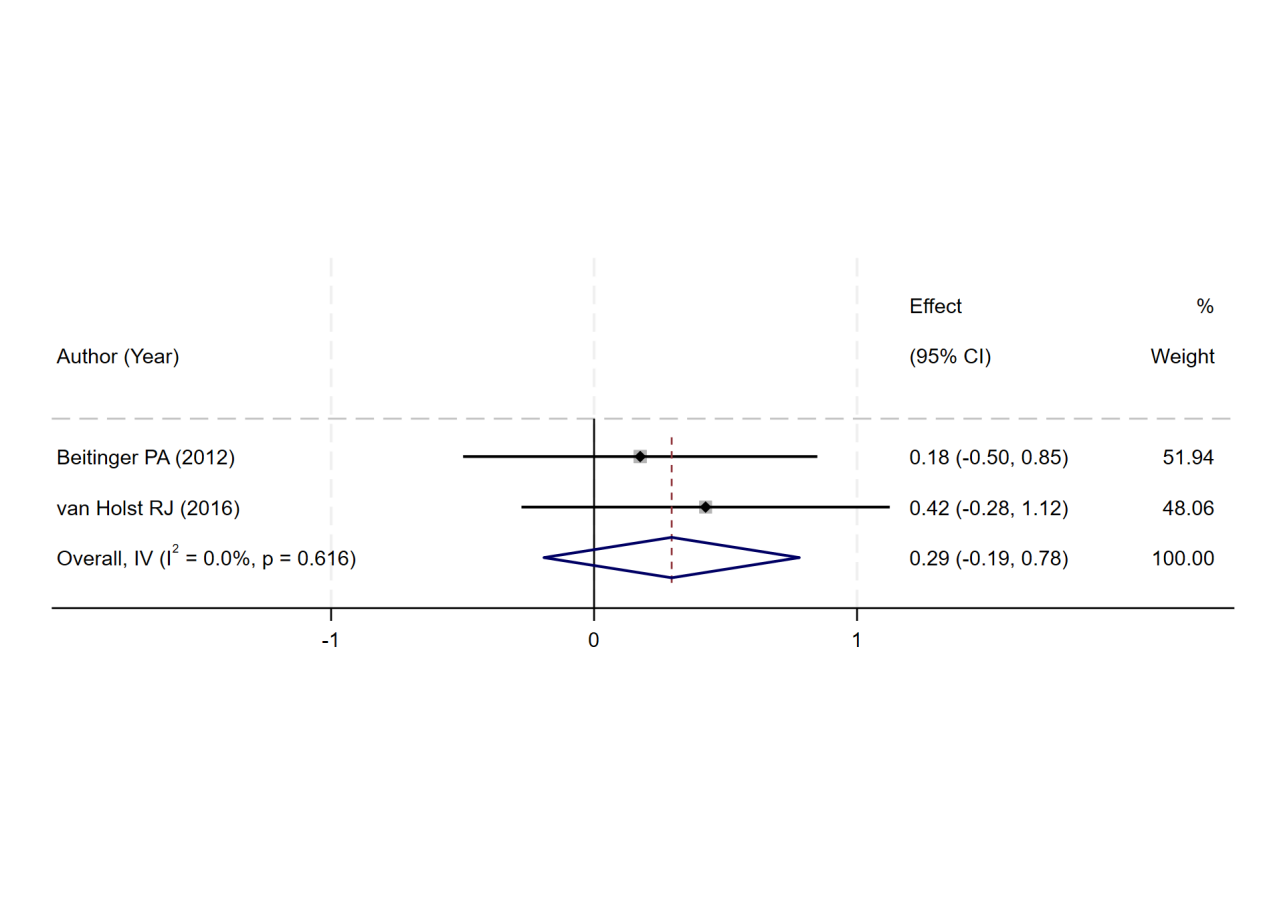


- - 1. By region, random effects model


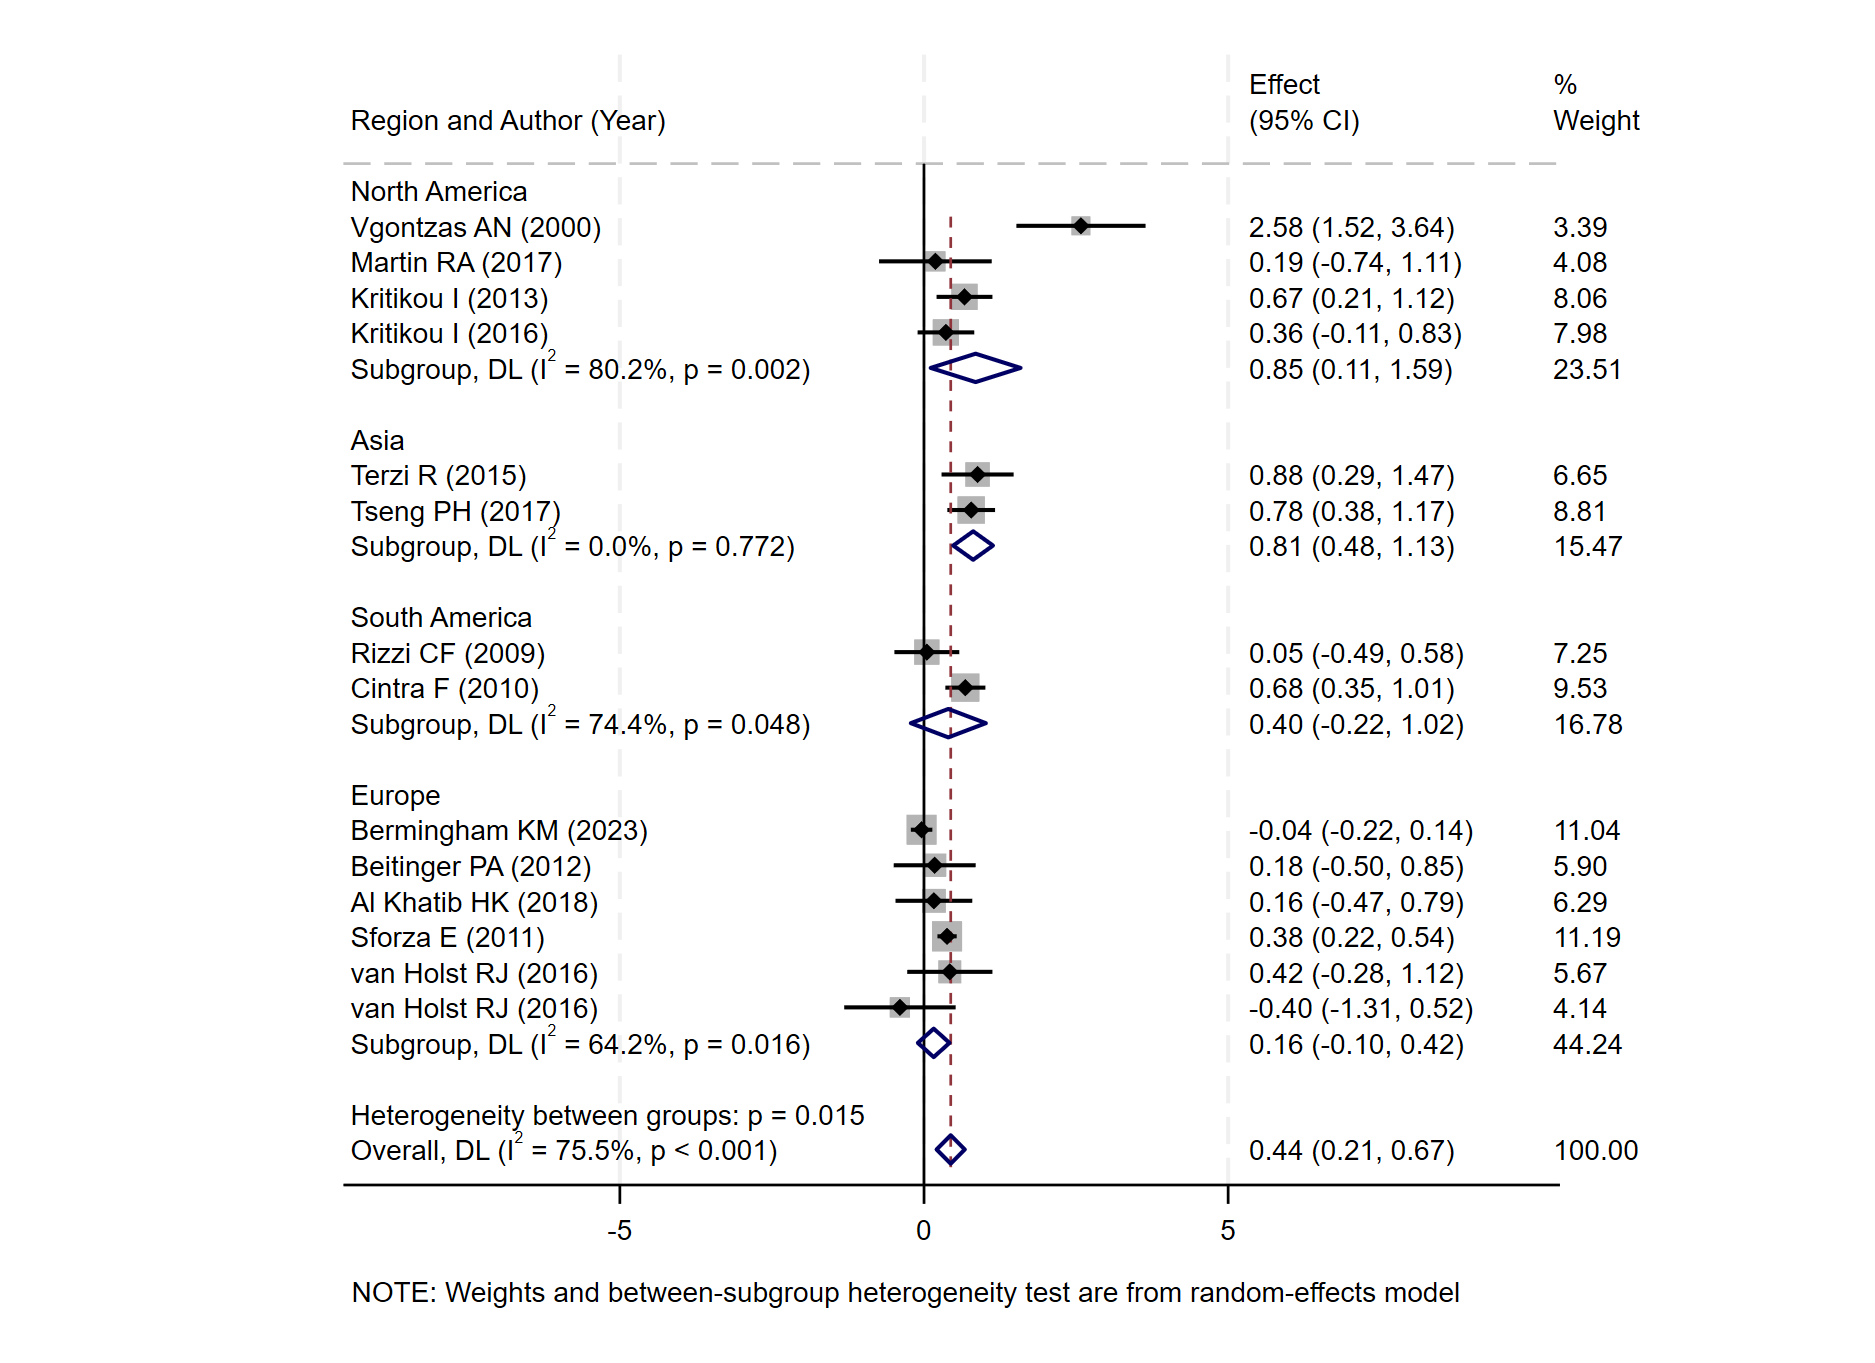


By region - Asia, fixed effect model


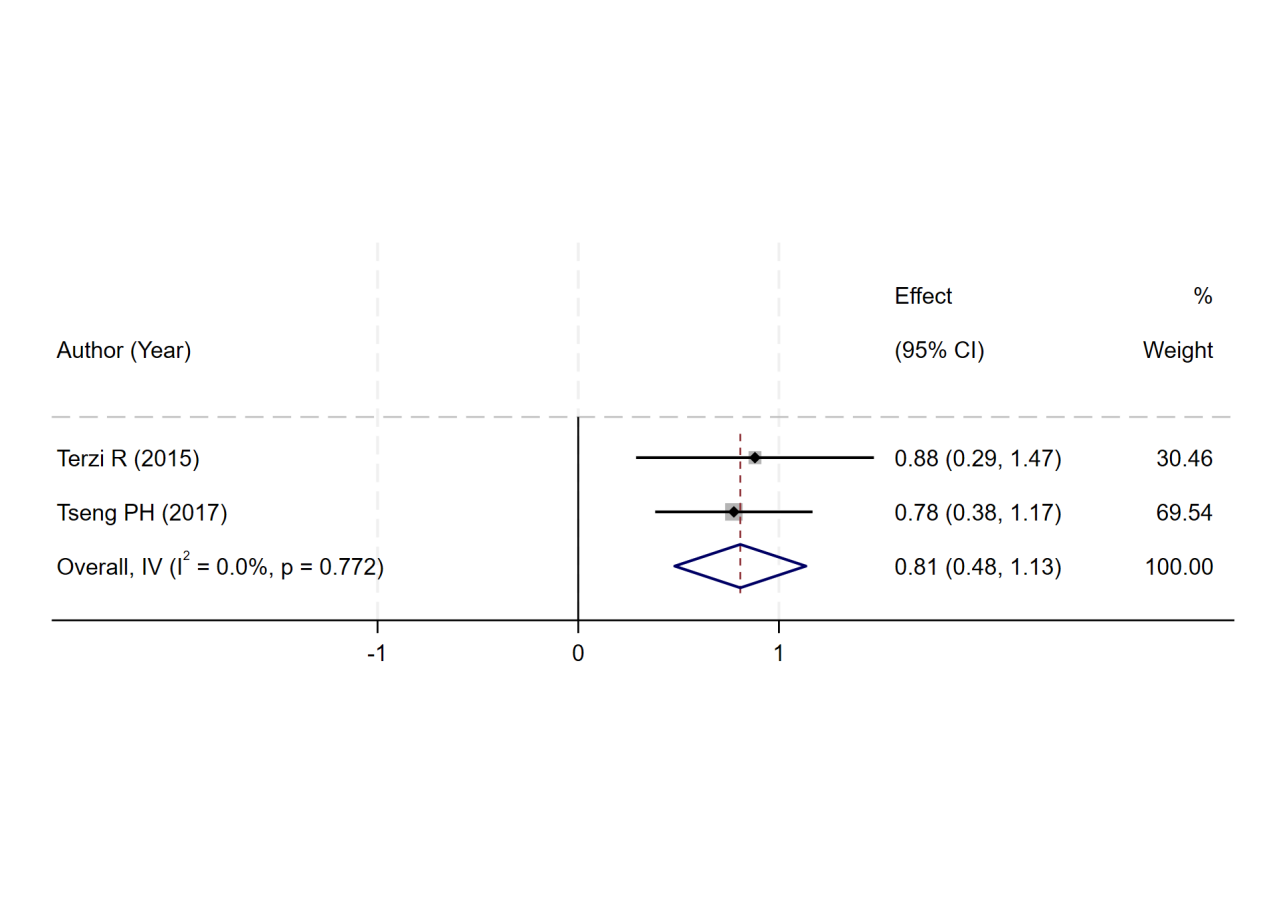


- - 1. By gender ratio (N(male)/N(female) > 1.5 = 1, ≤ 1.5 = 0), random effects model


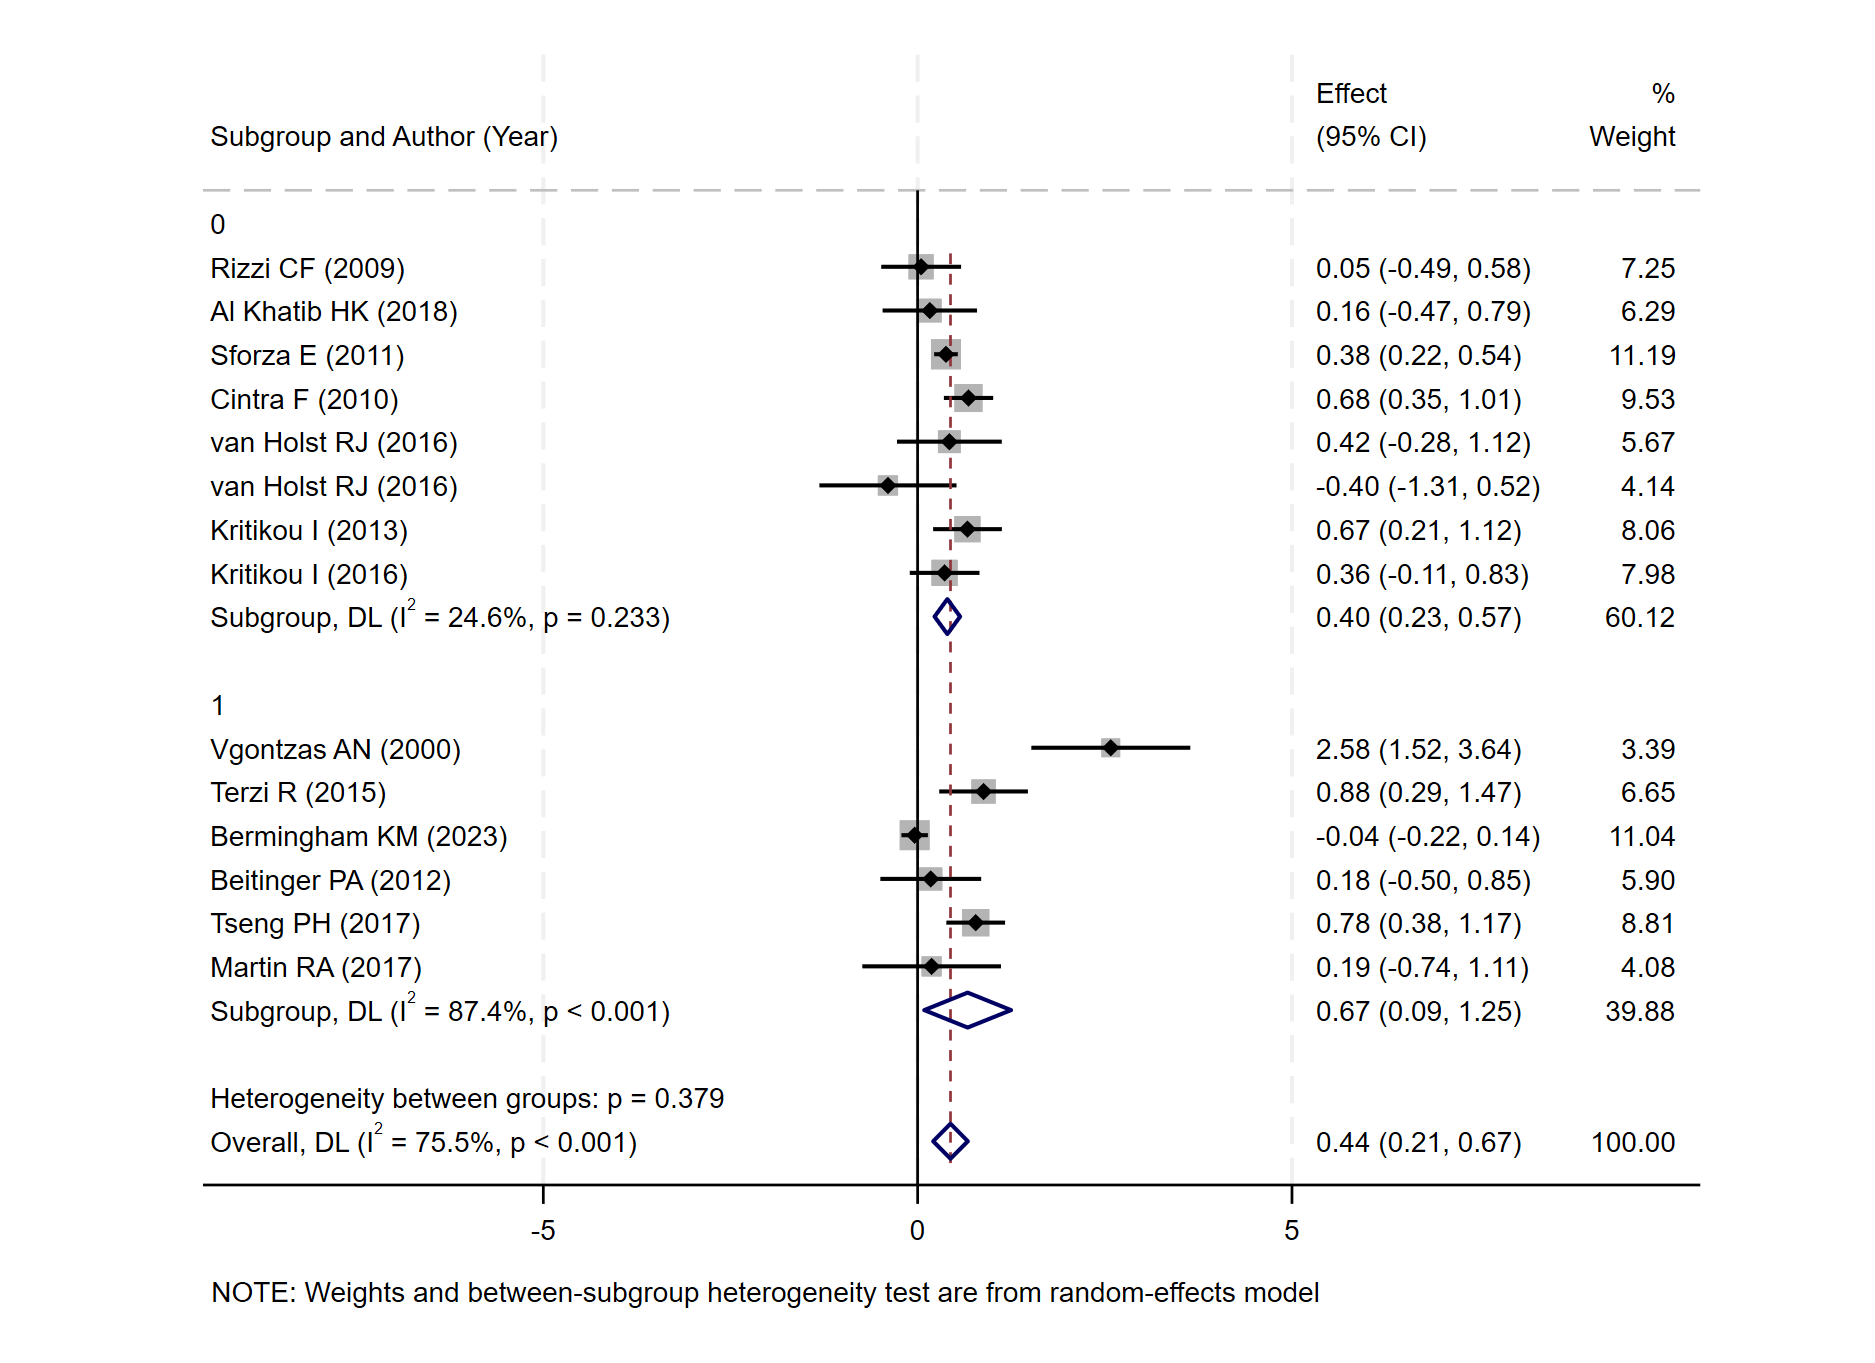


By gender ratio - N(male)/N(female) ≤ 1.5, fixed effects model


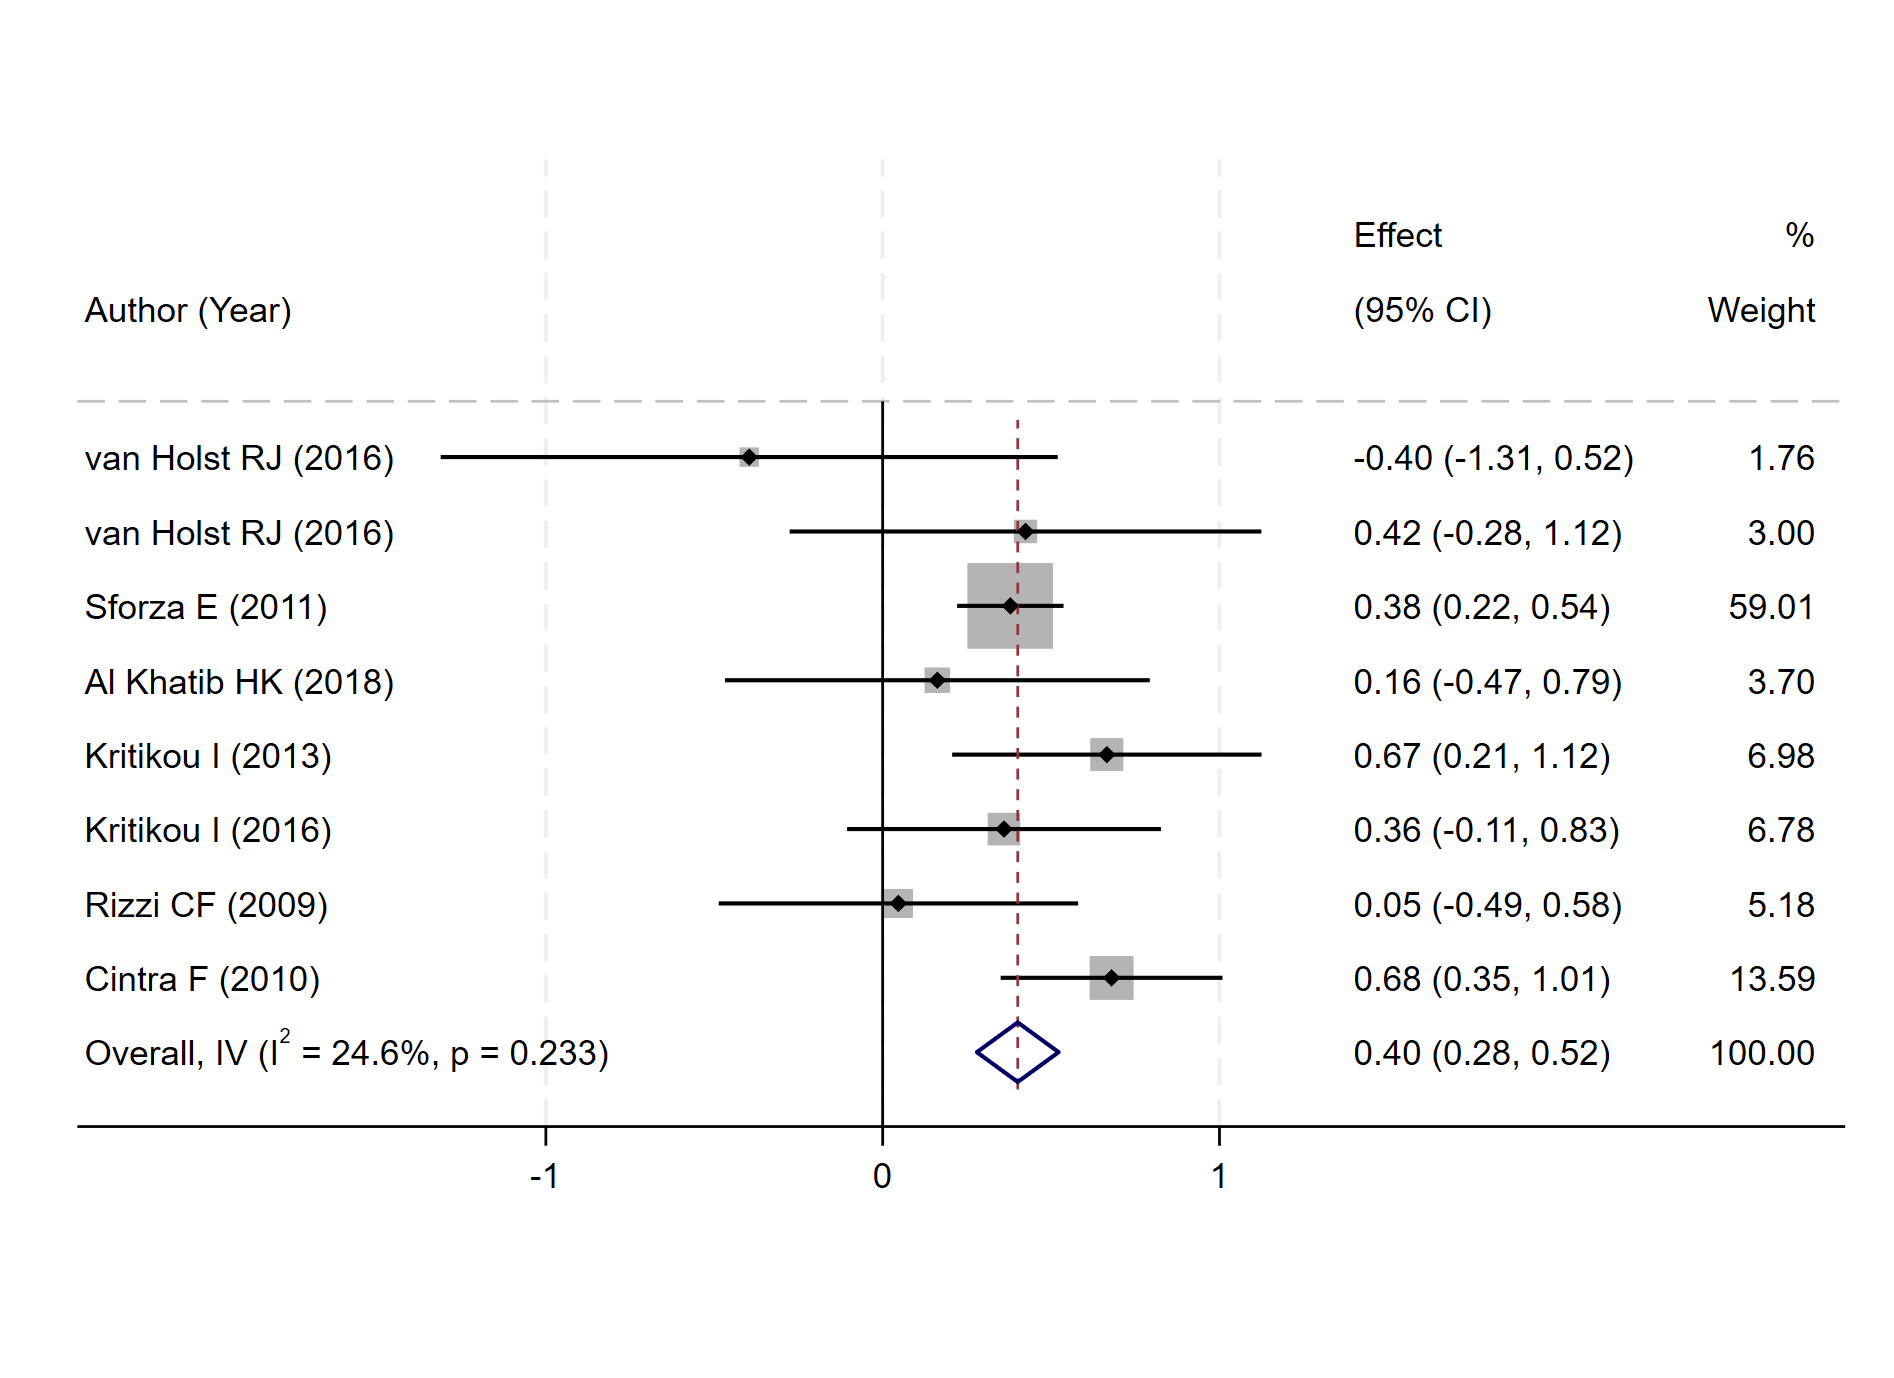


- - 1. By age range (mean value ≤ 30 = 0, mean > 30 = 1), random effects model


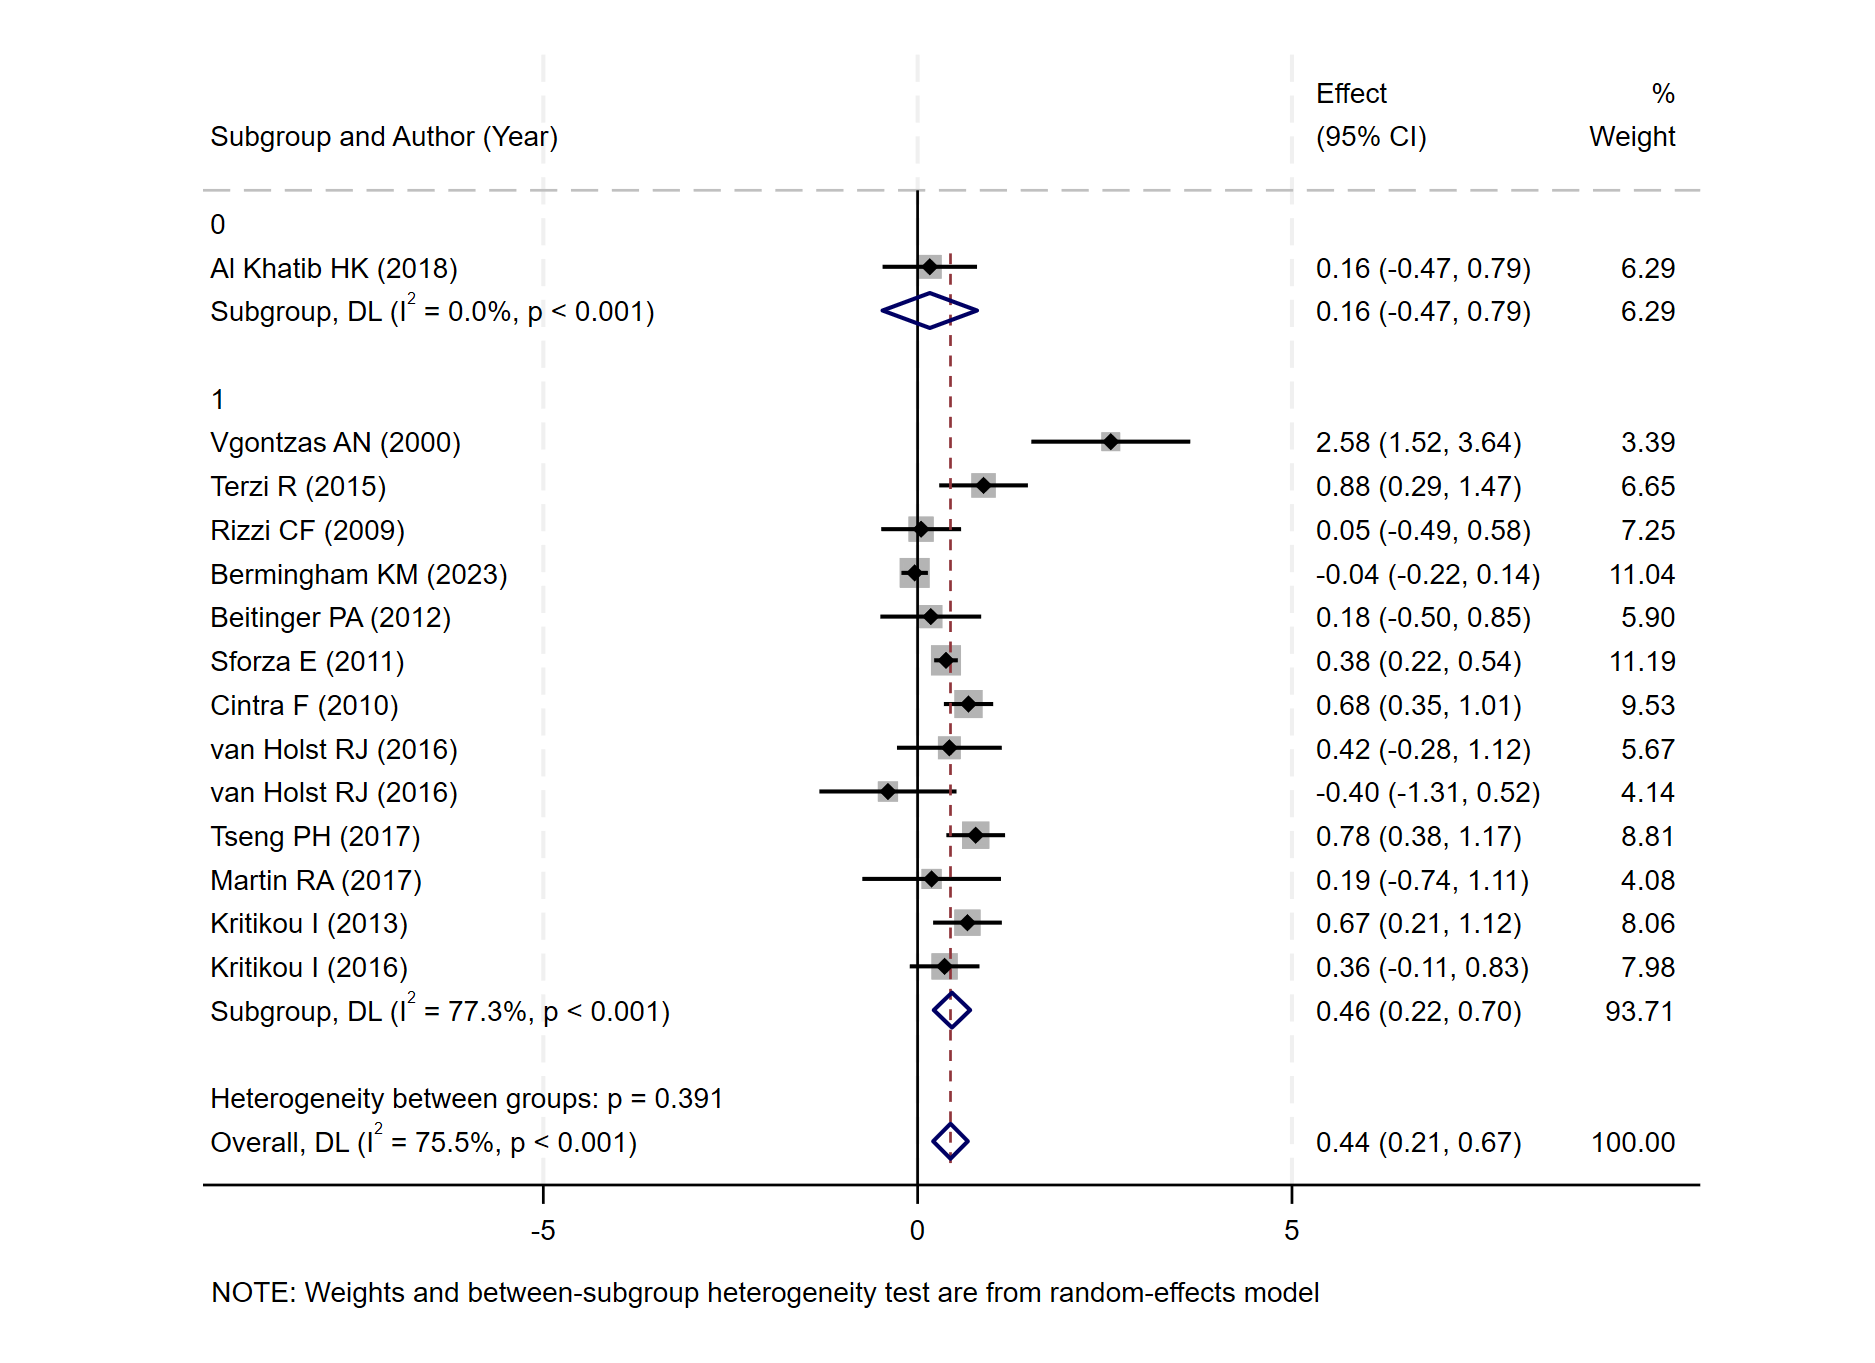


- 1. Waist circumference
     1. By region, fixed effects model


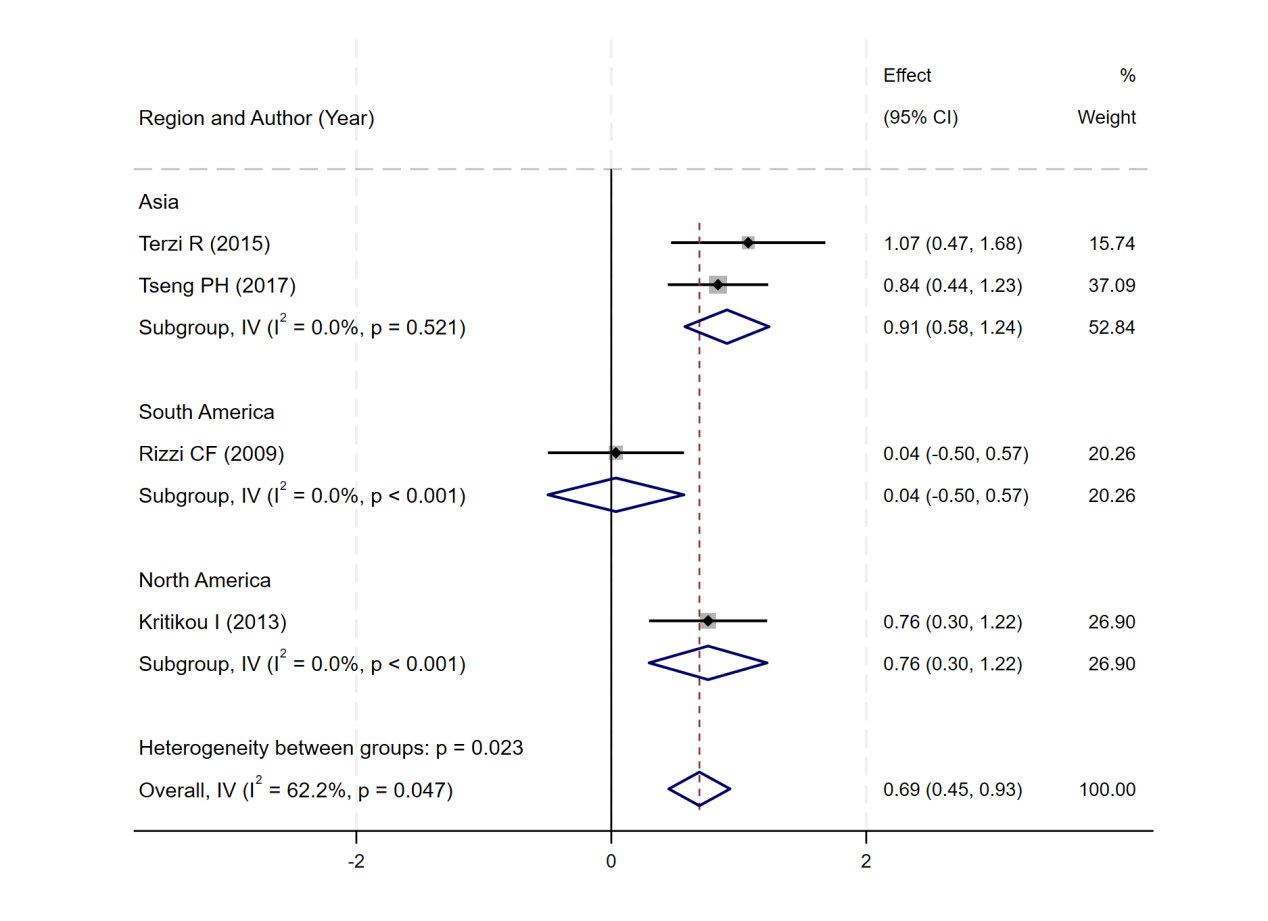


- - 1. By gender ratio (N(male)/N(female) > 1.5 = 1, ≤ 1.5 = 0), fixed effects model


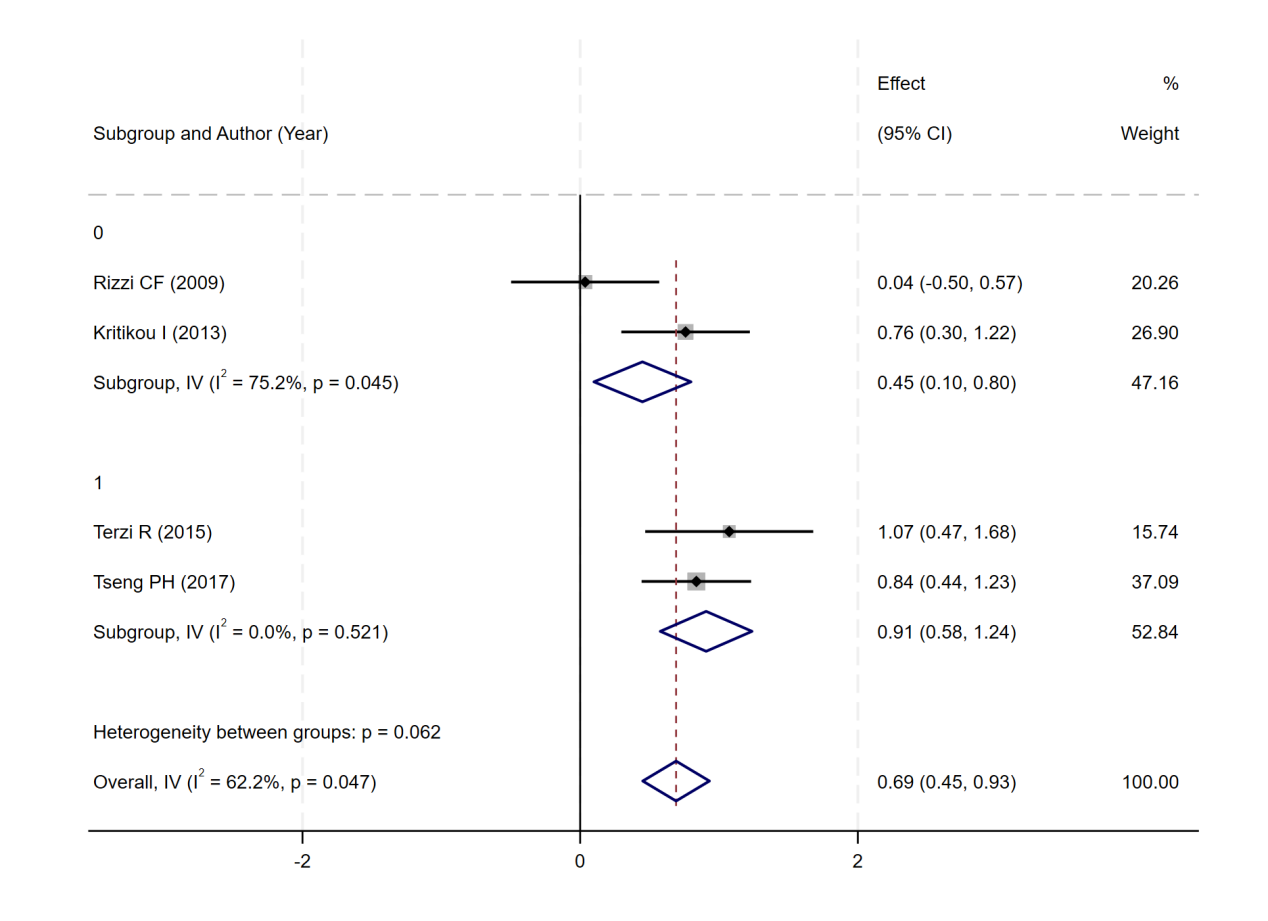


- 1. Neck circumference
     1. By region, random effects model


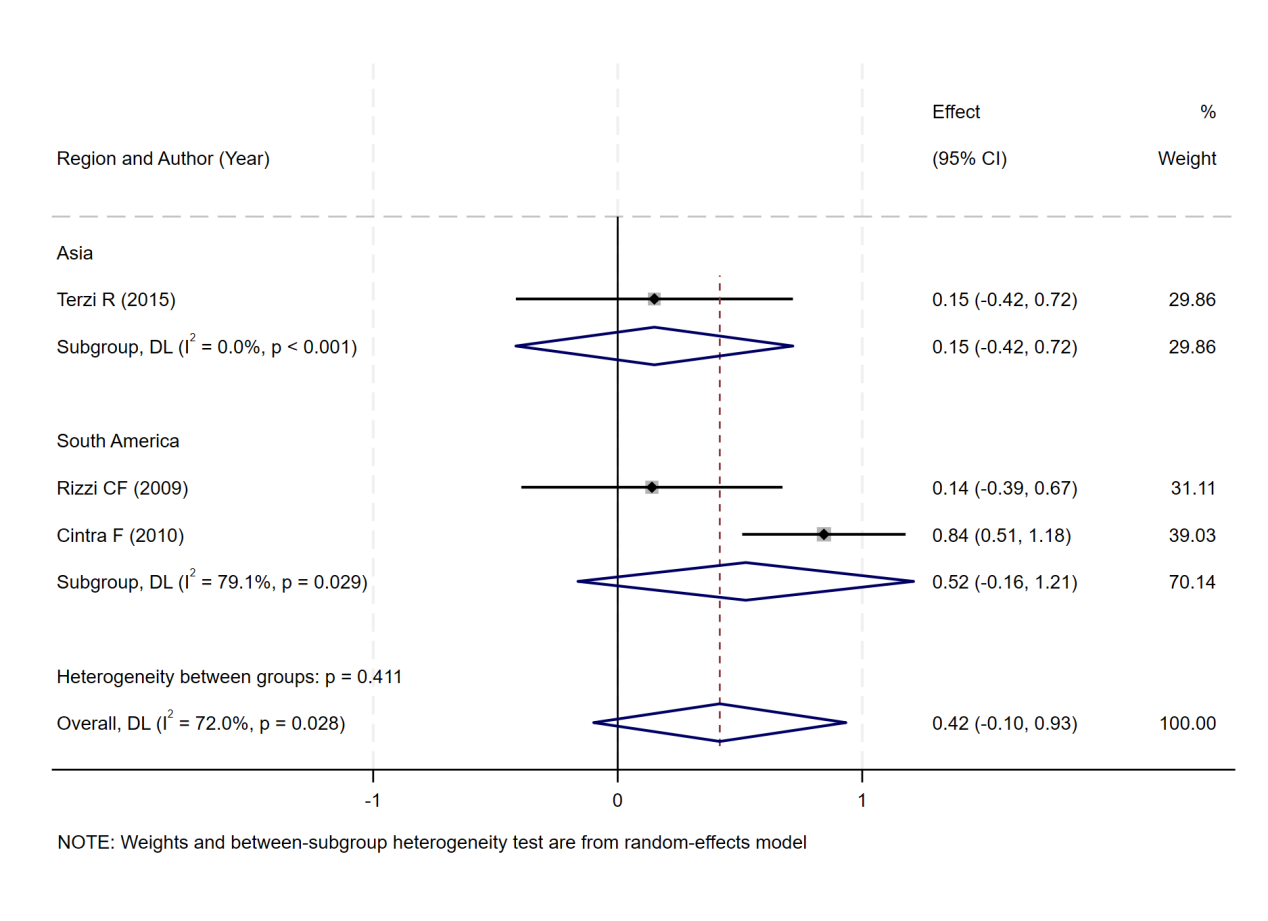


- - 1. By gender ratio (N(male)/N(female) > 1.5 = 1, ≤ 1.5 = 0), random effects model


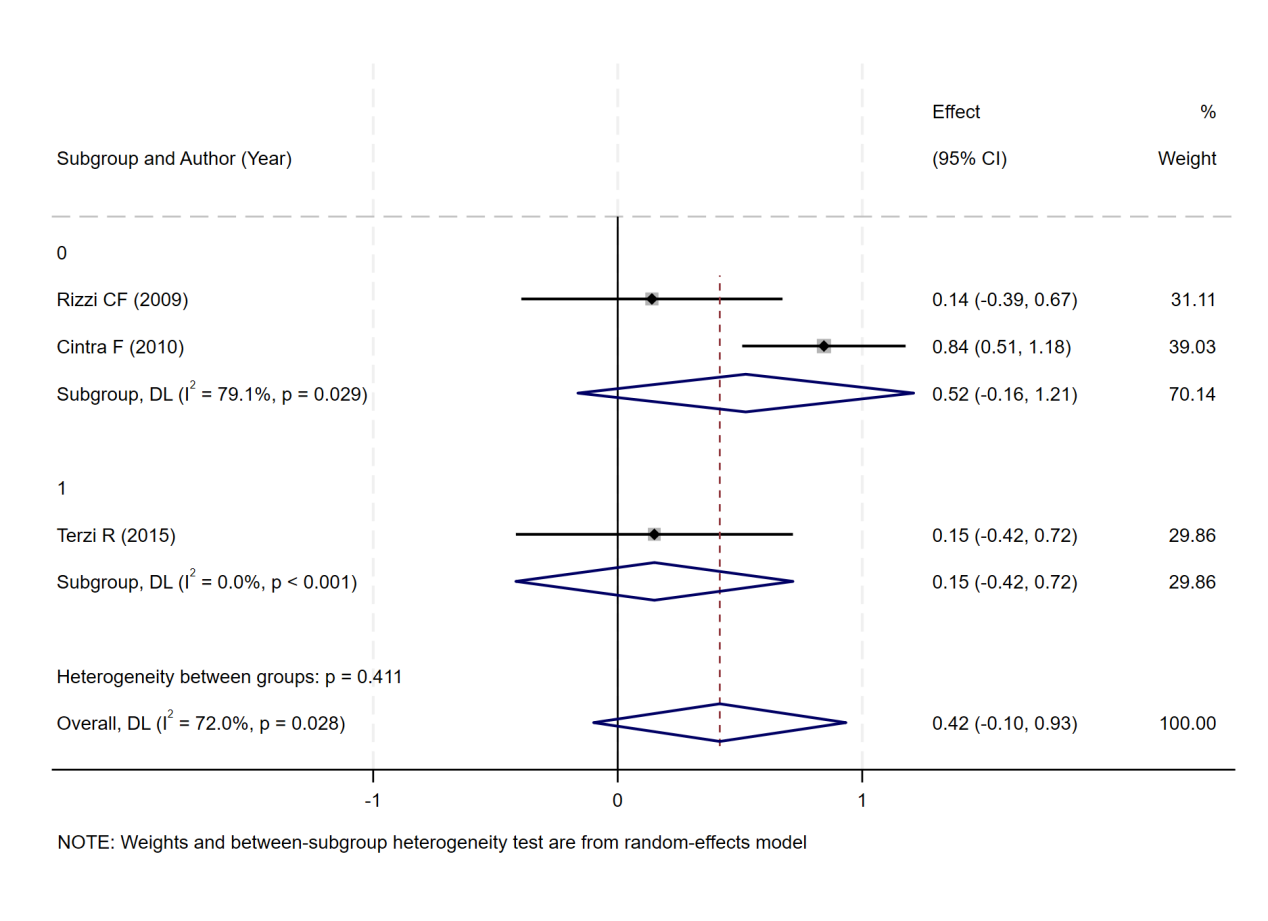


- 1. Fasting glucose
     1. By observation, random effects model


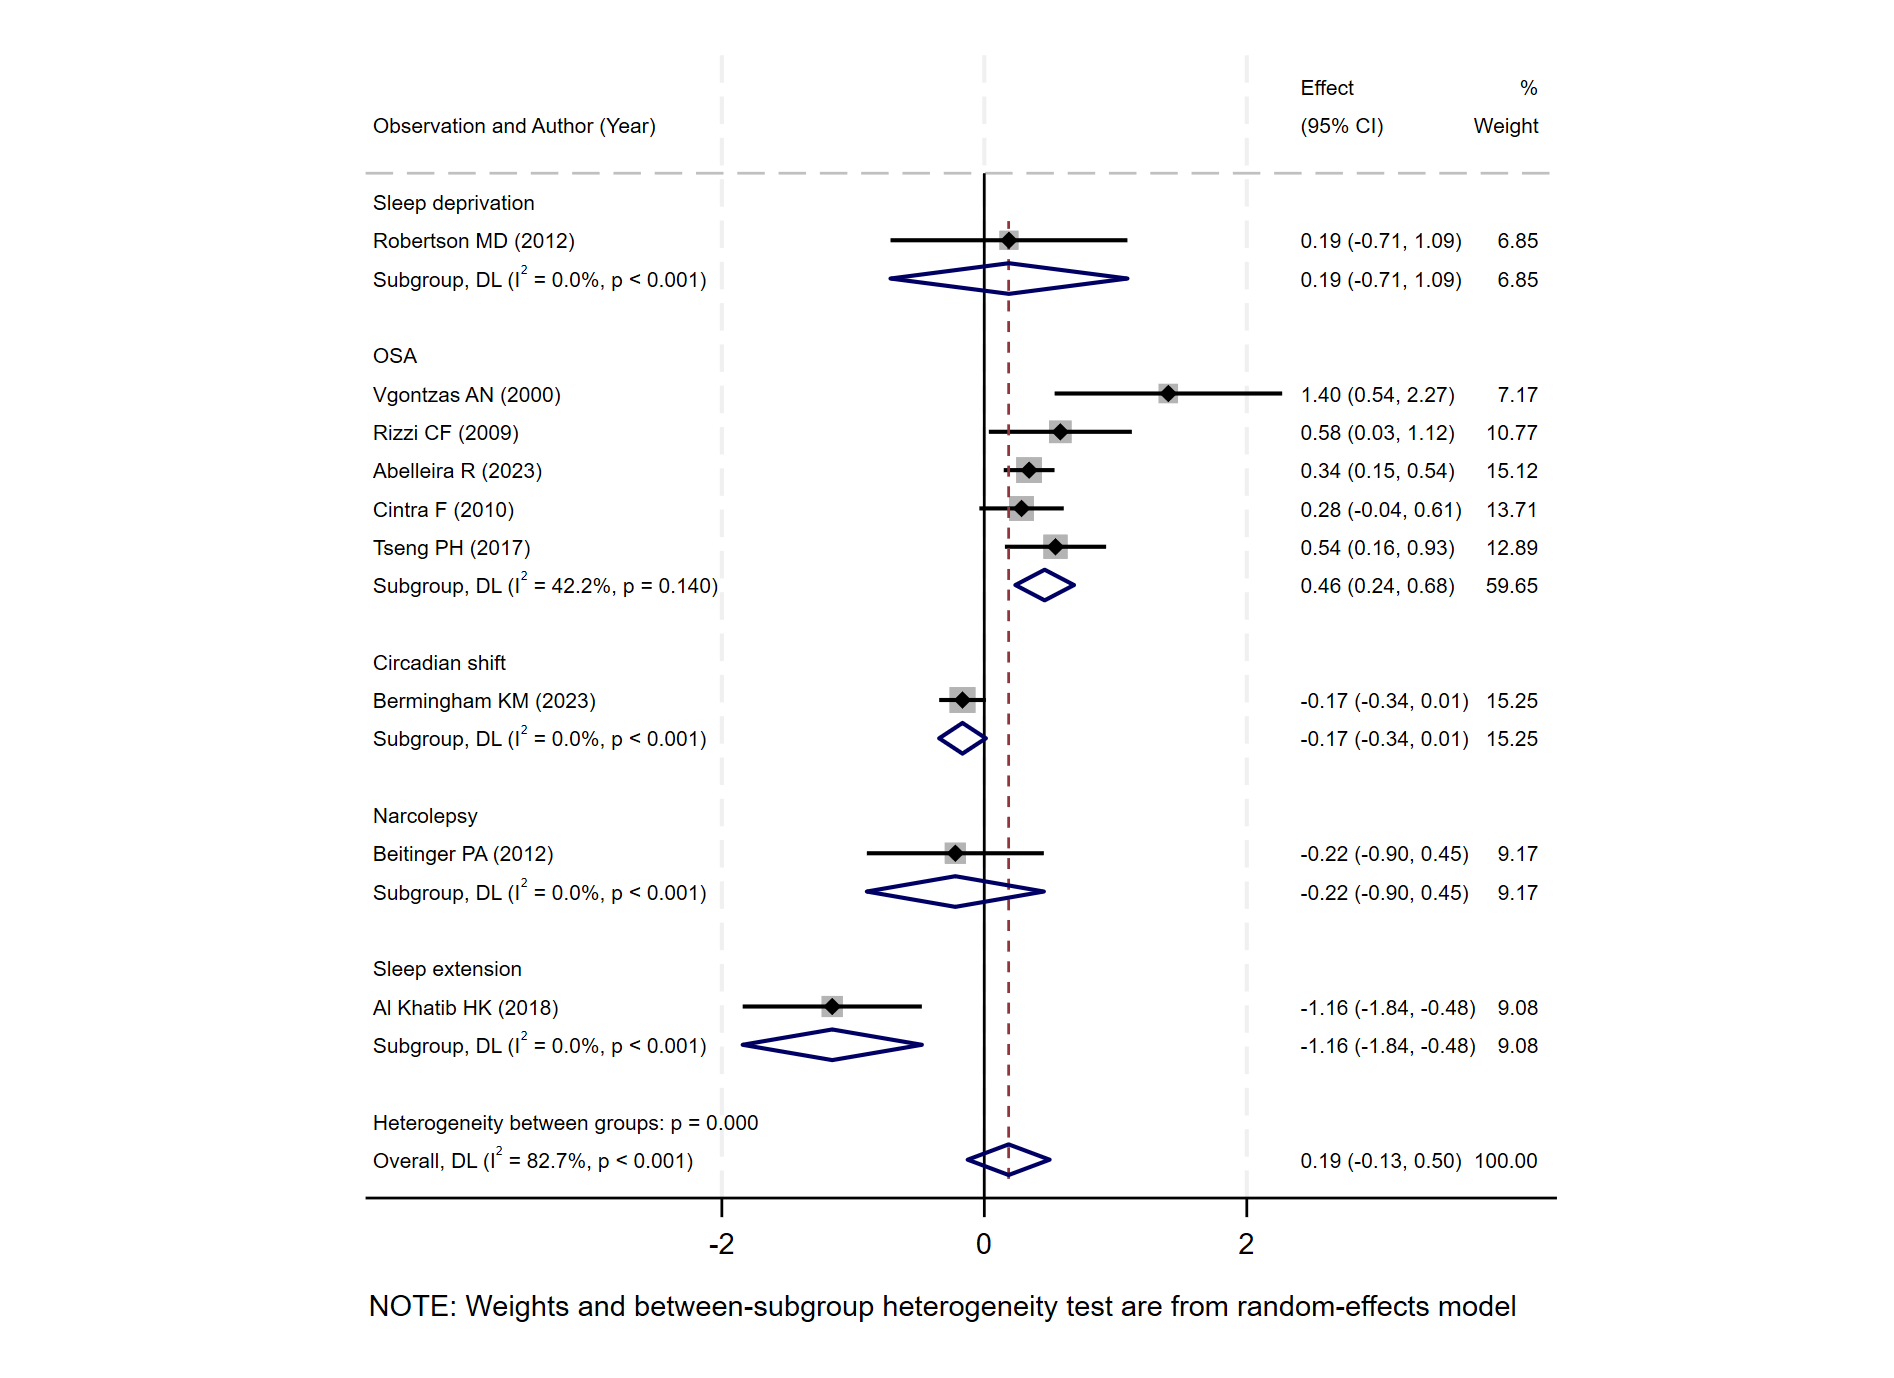


- - 1. By region, random effects model


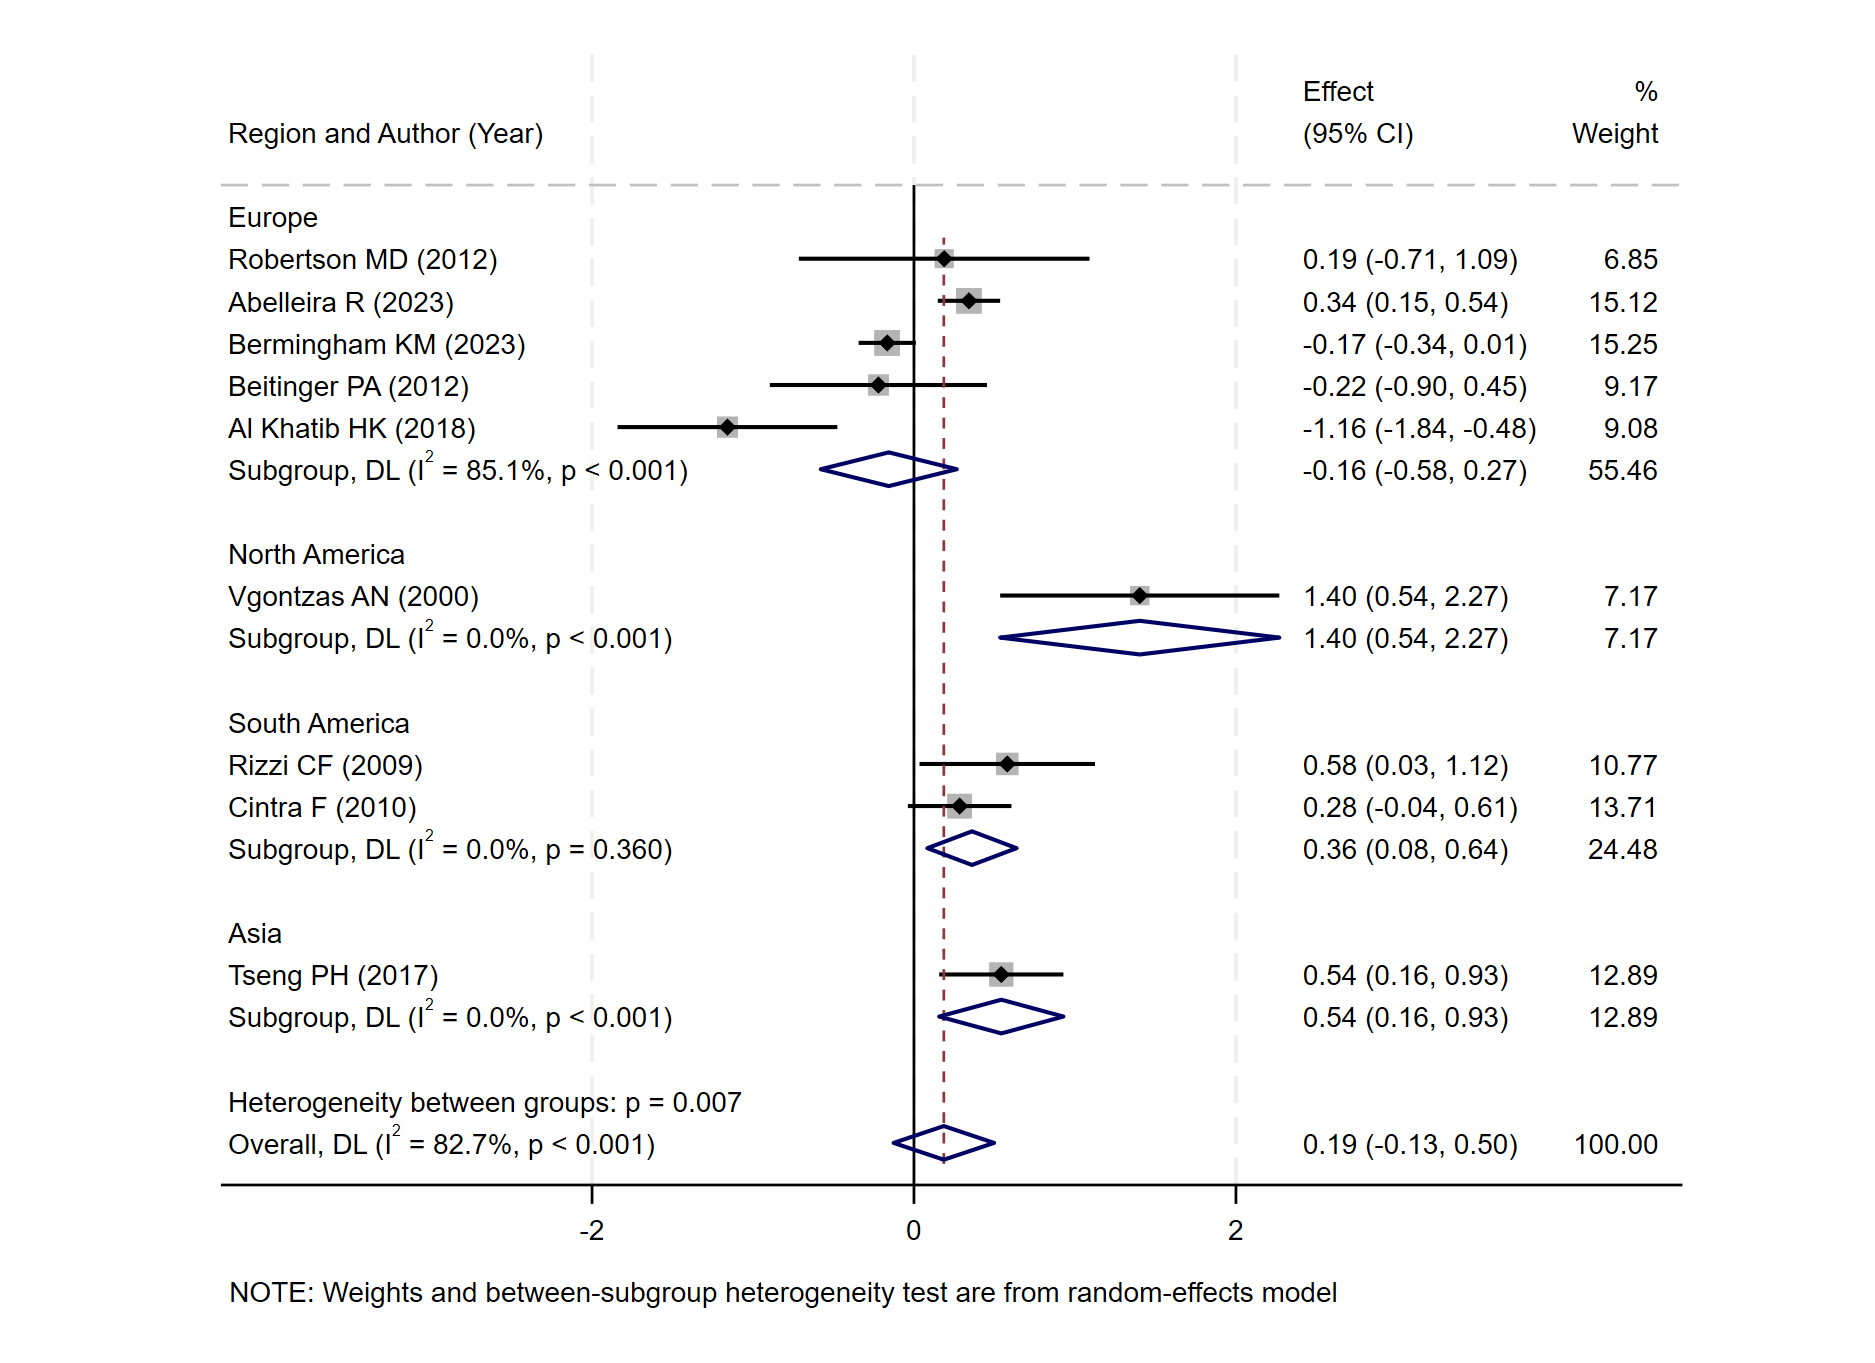


By region - South America, fixed effects model


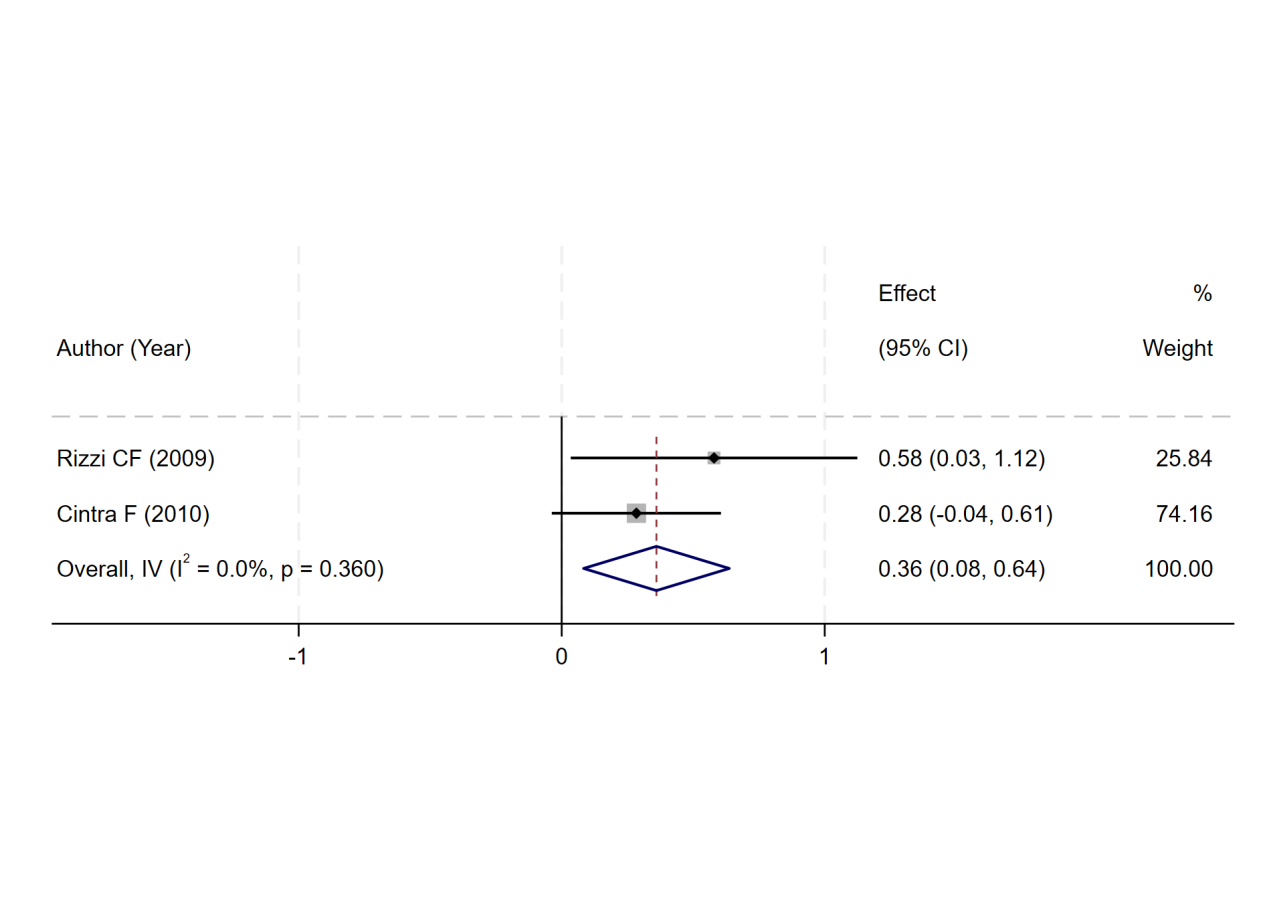


- - 1. By gender ratio (N(male)/N(female) > 1.5 = 1, ≤ 1.5 = 0), random effects model


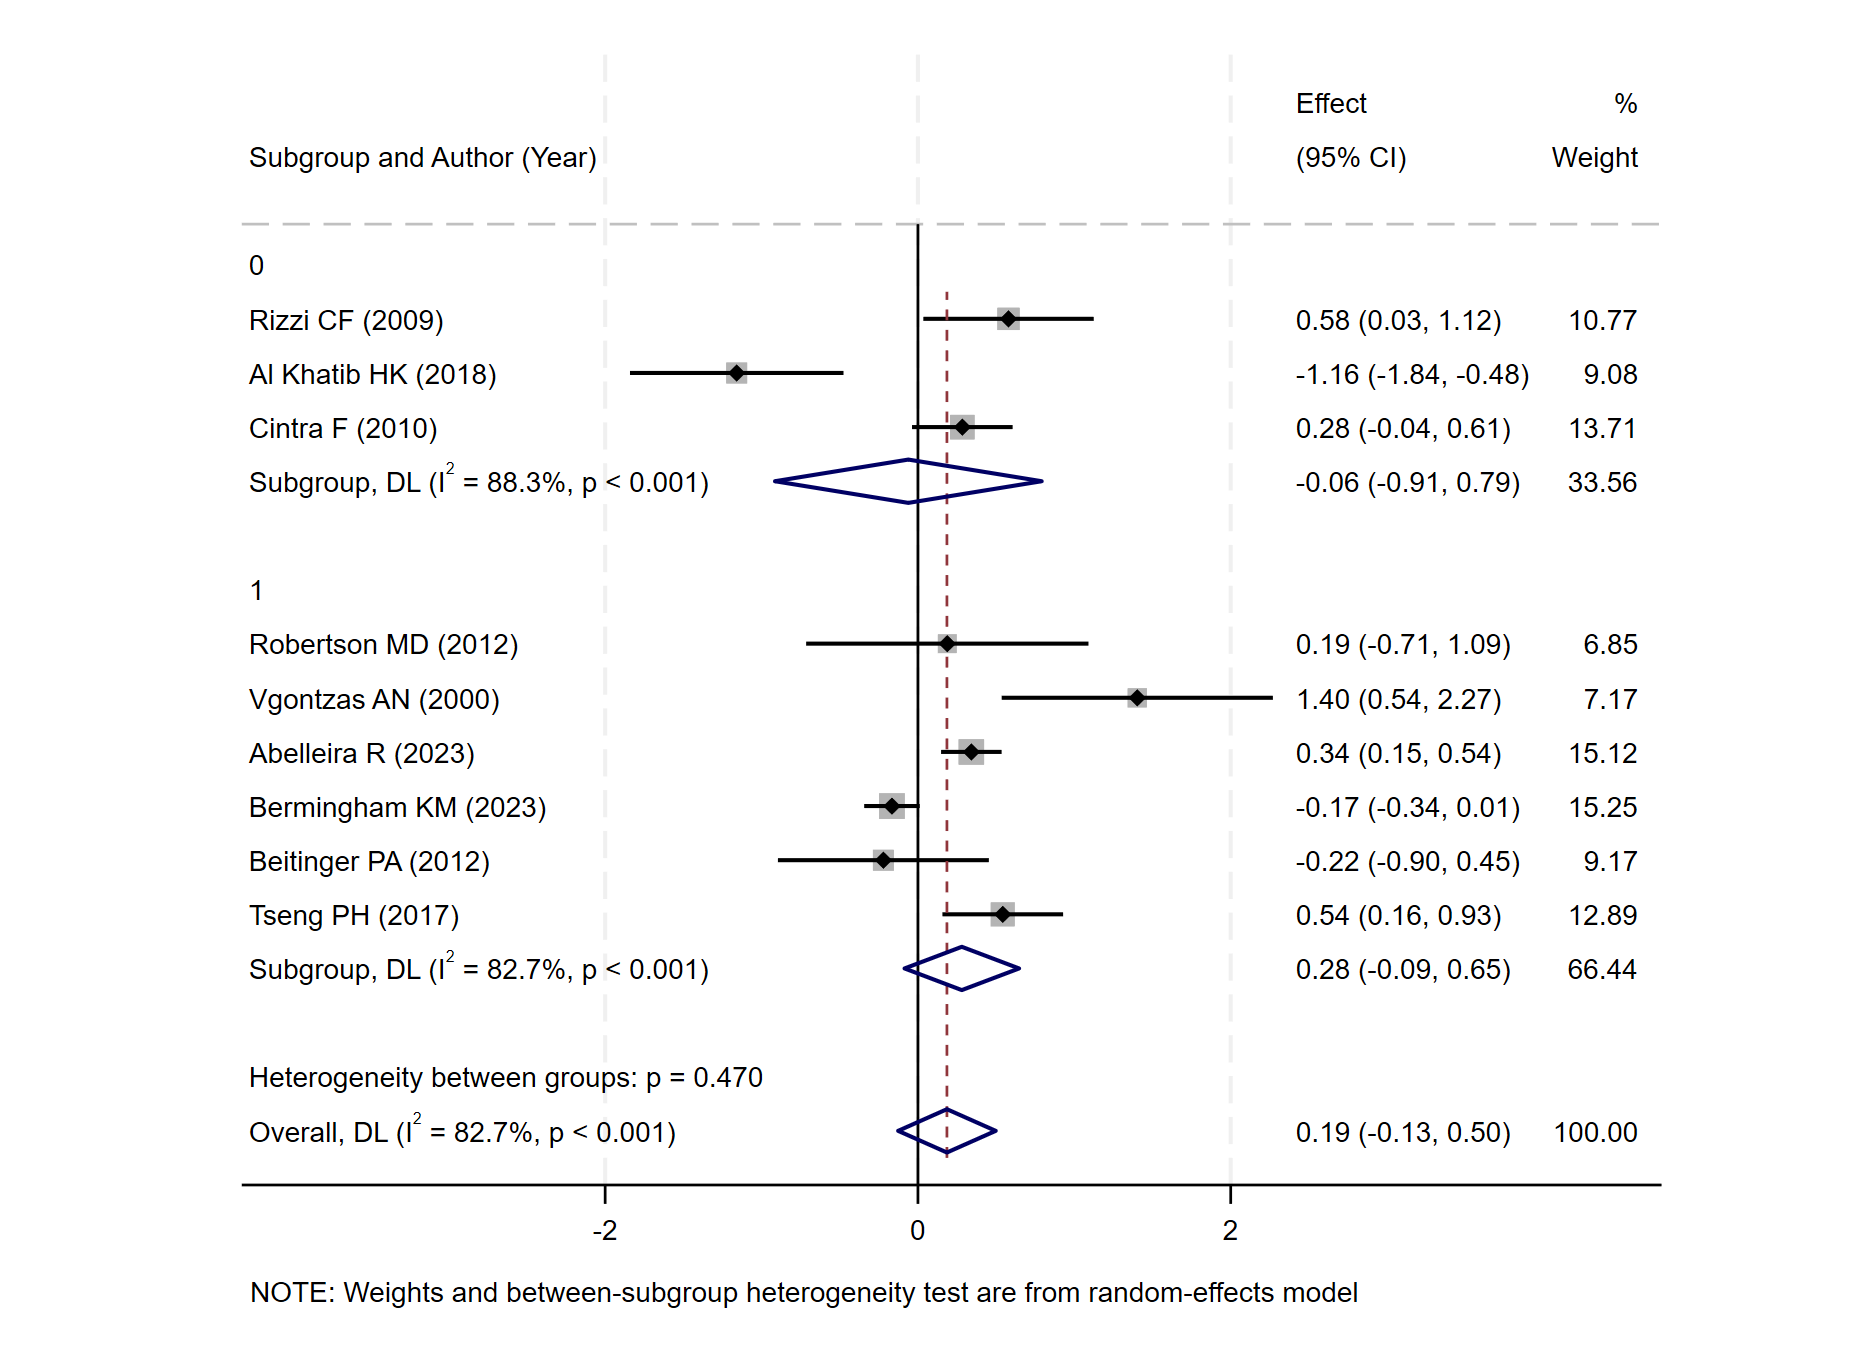


- - 1. By age range (mean value ≤ 30 = 0, mean > 30 = 1), random effects model


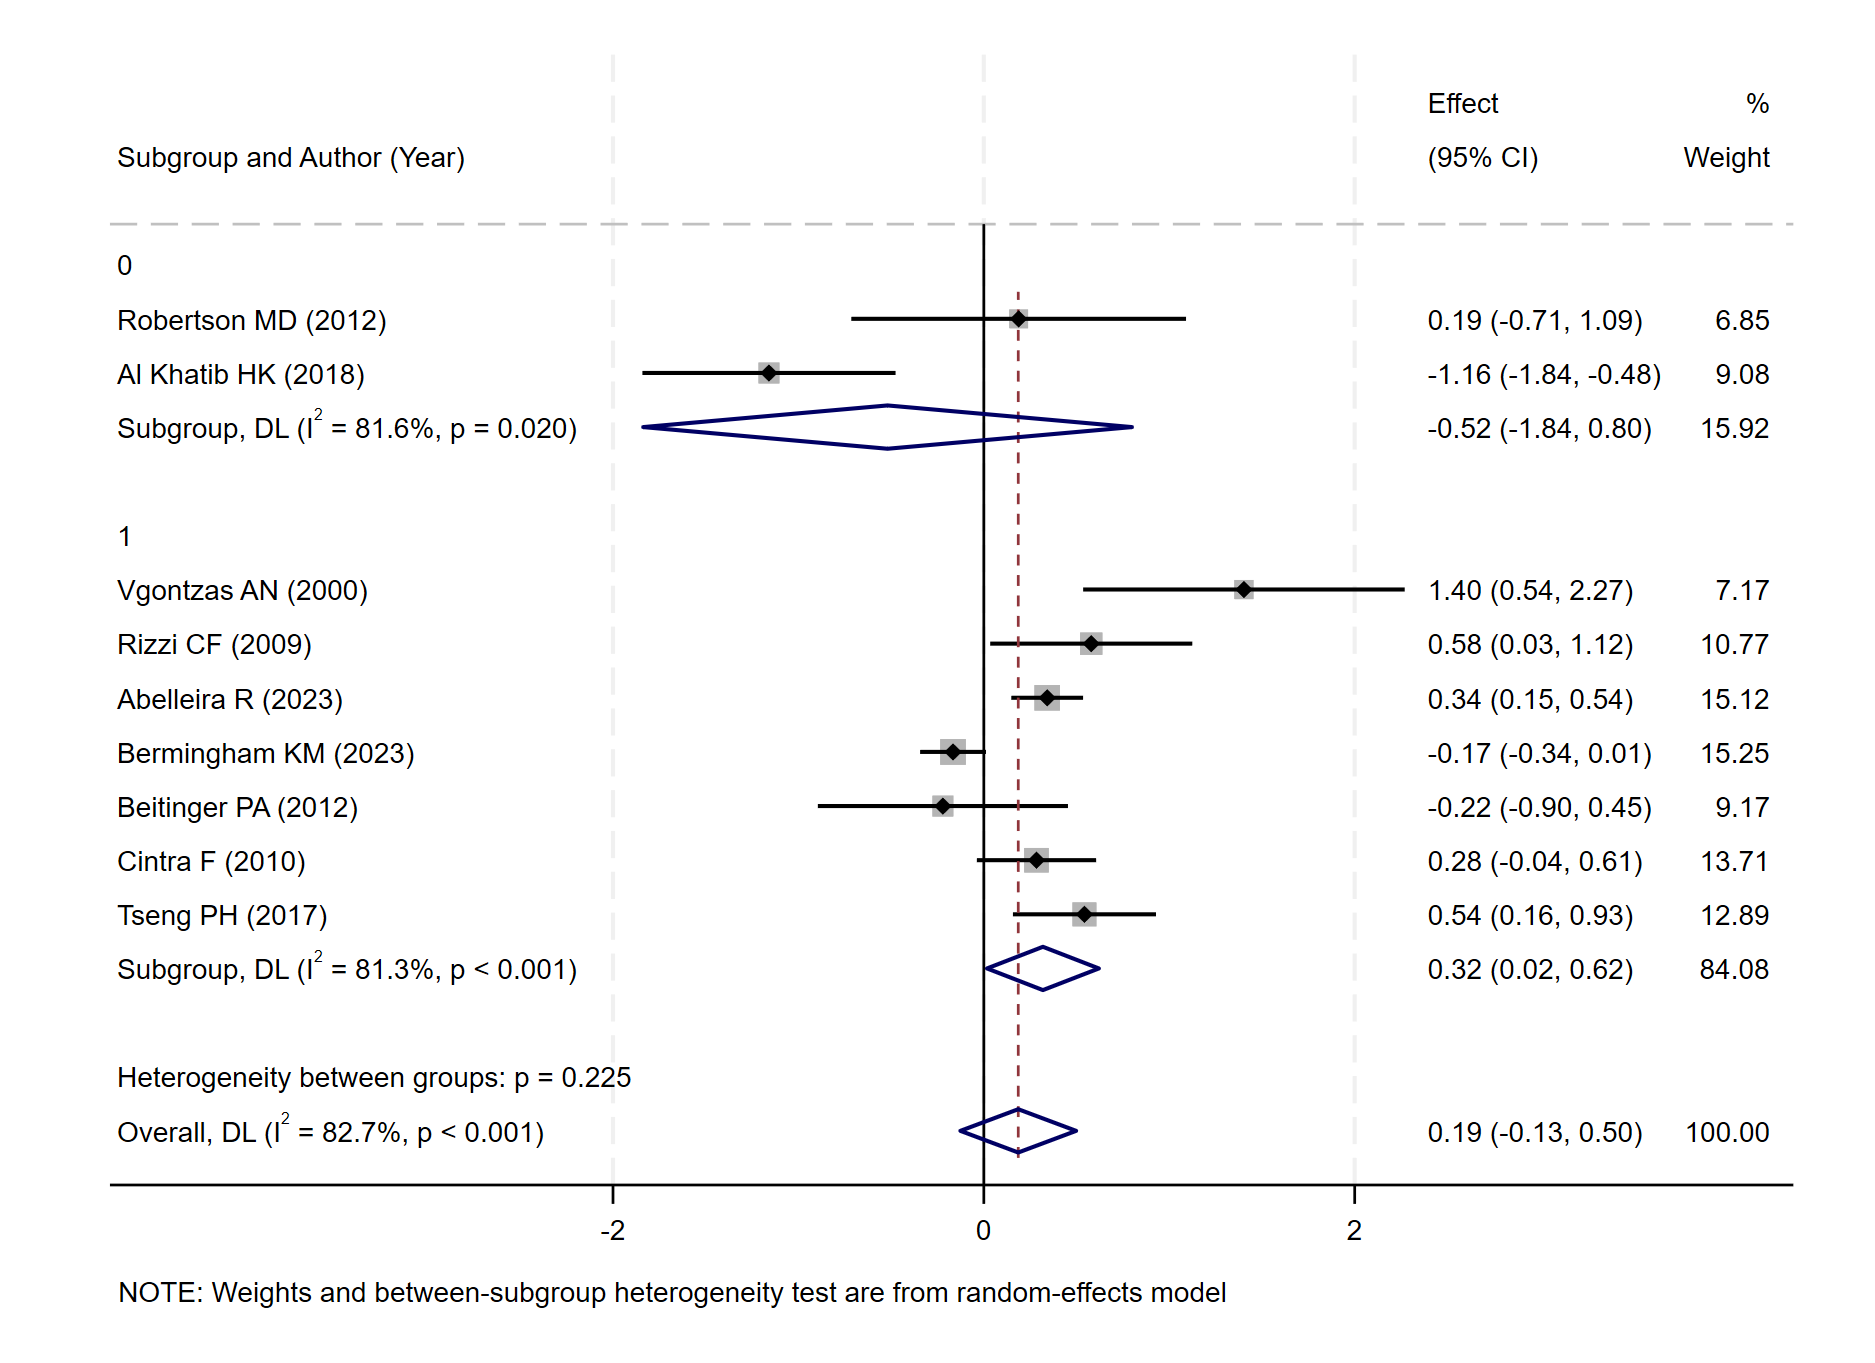


- 1. HbA1c
     1. By observation, fixed effects model


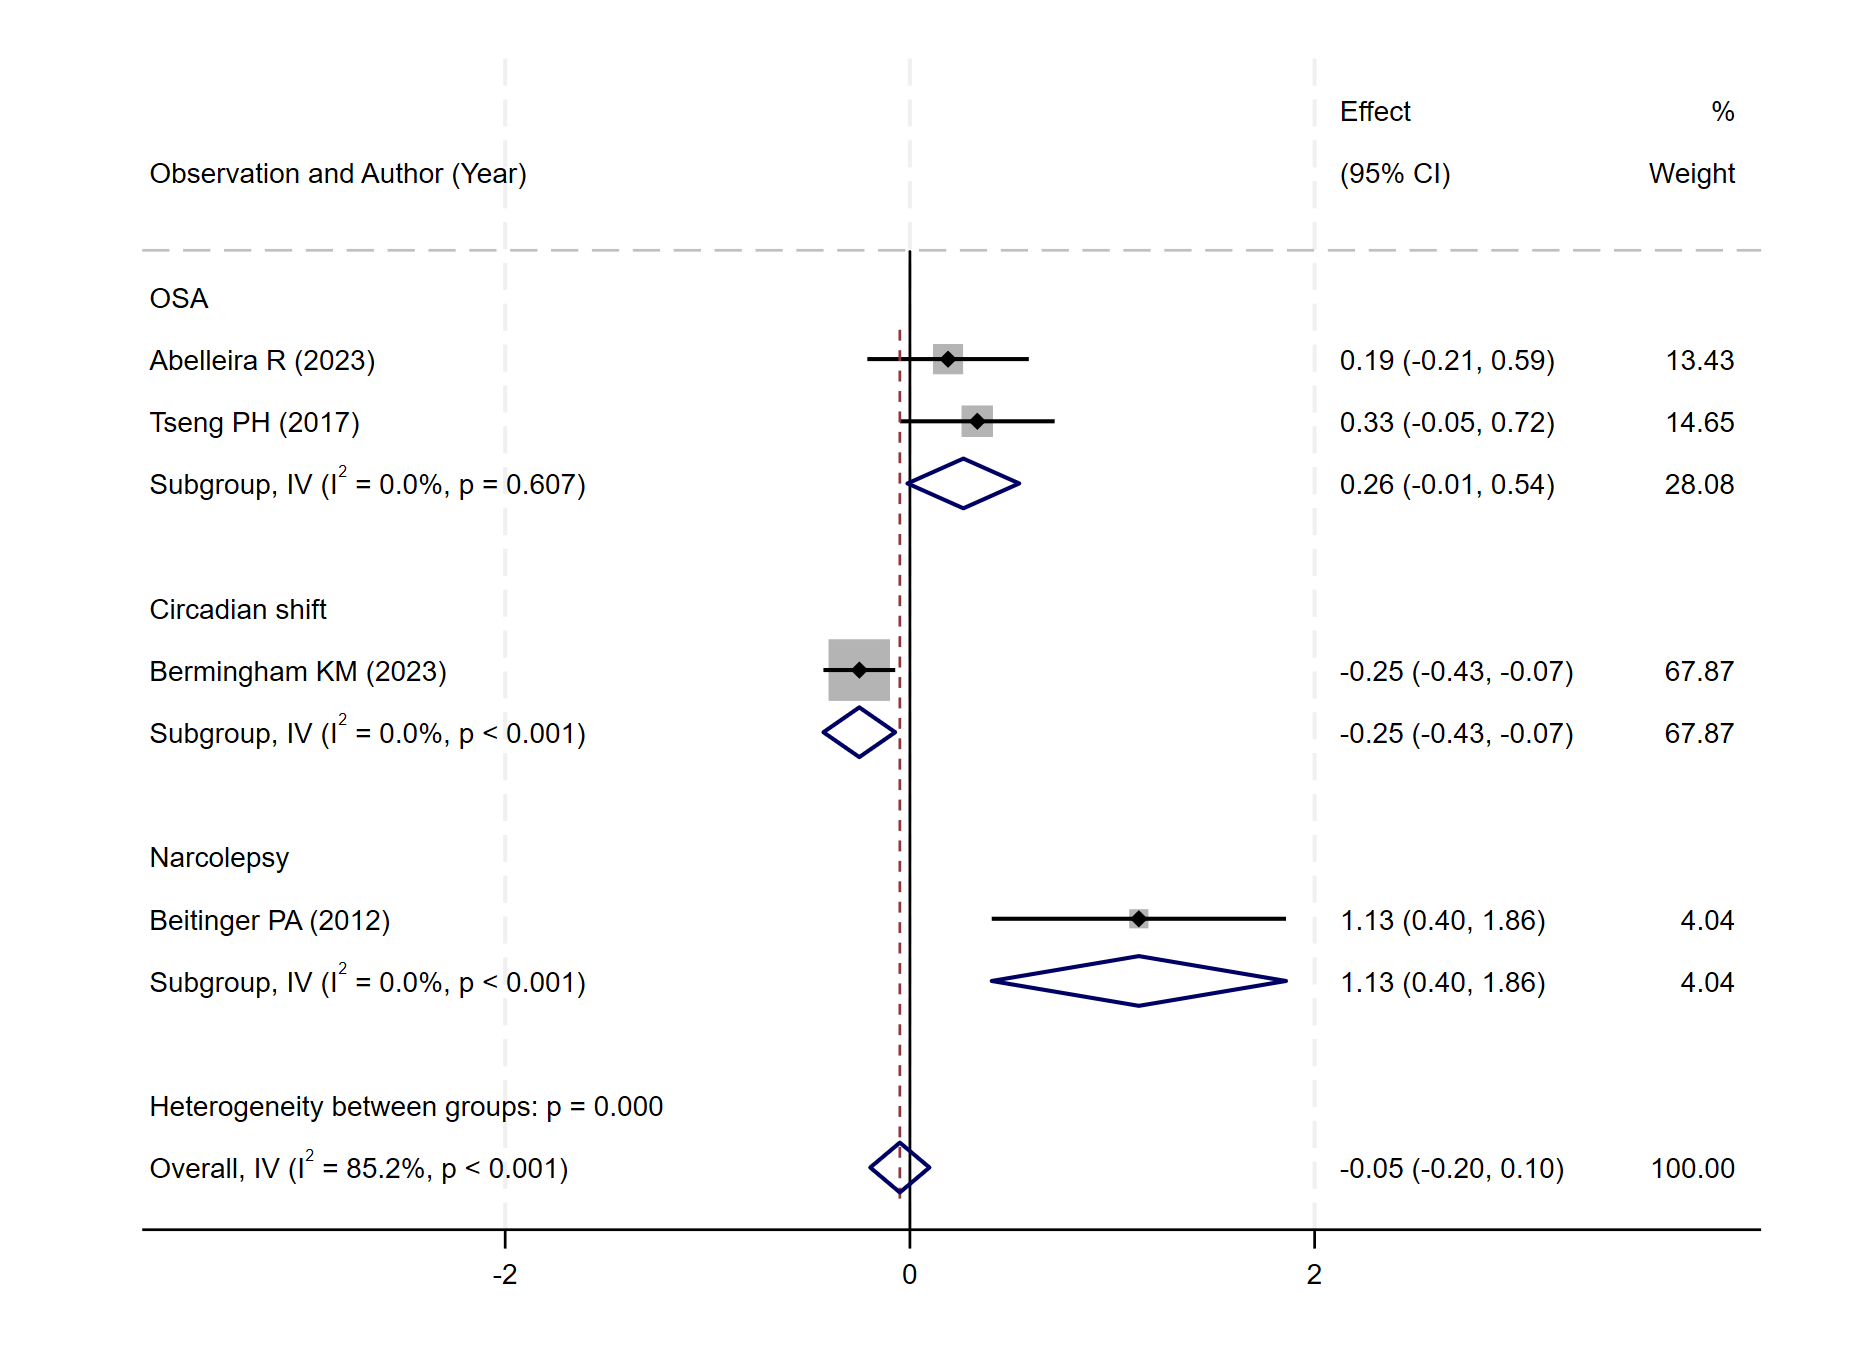


- - 1. By region, fixed effects model


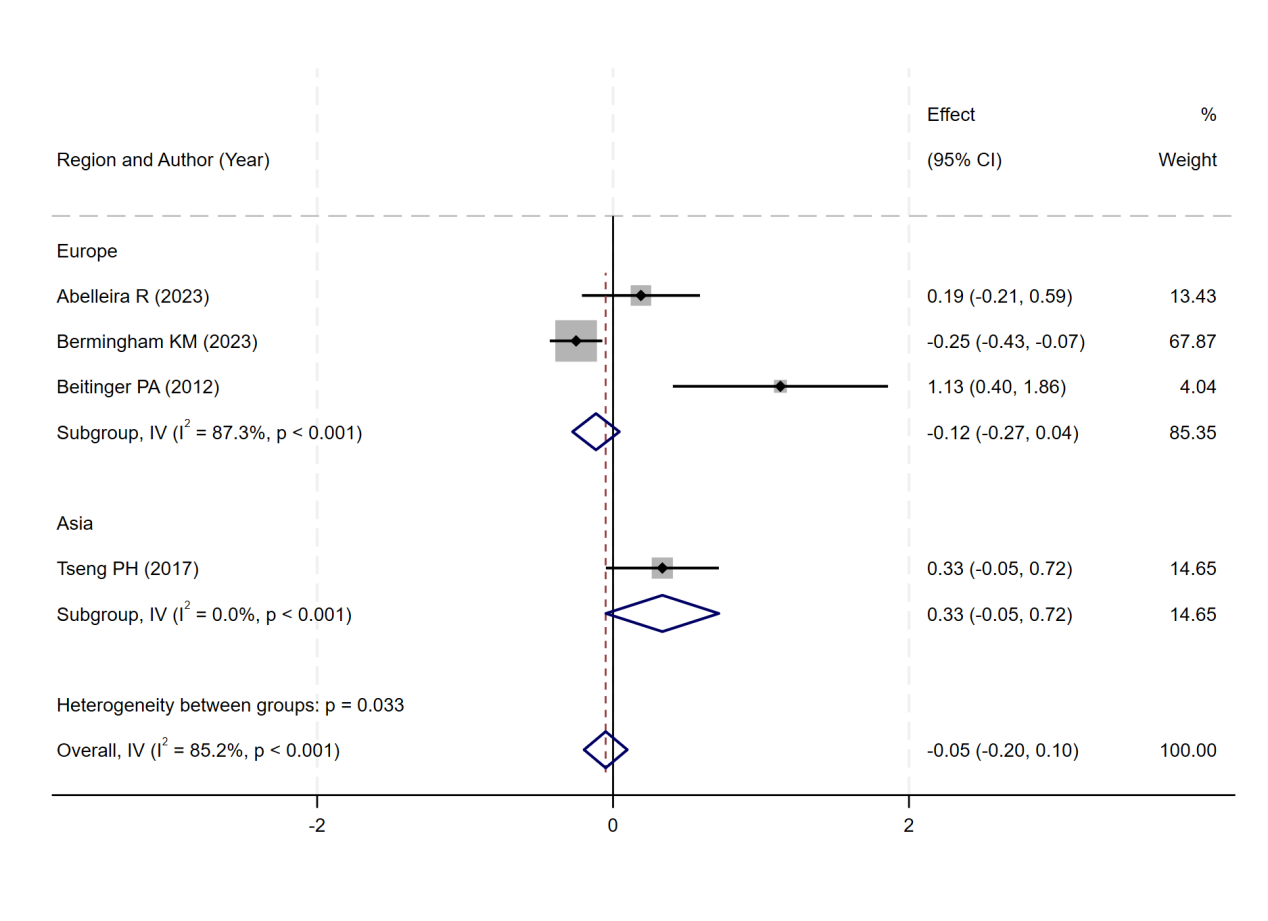


- 1. LDL
     1. By observation, fixed effects model


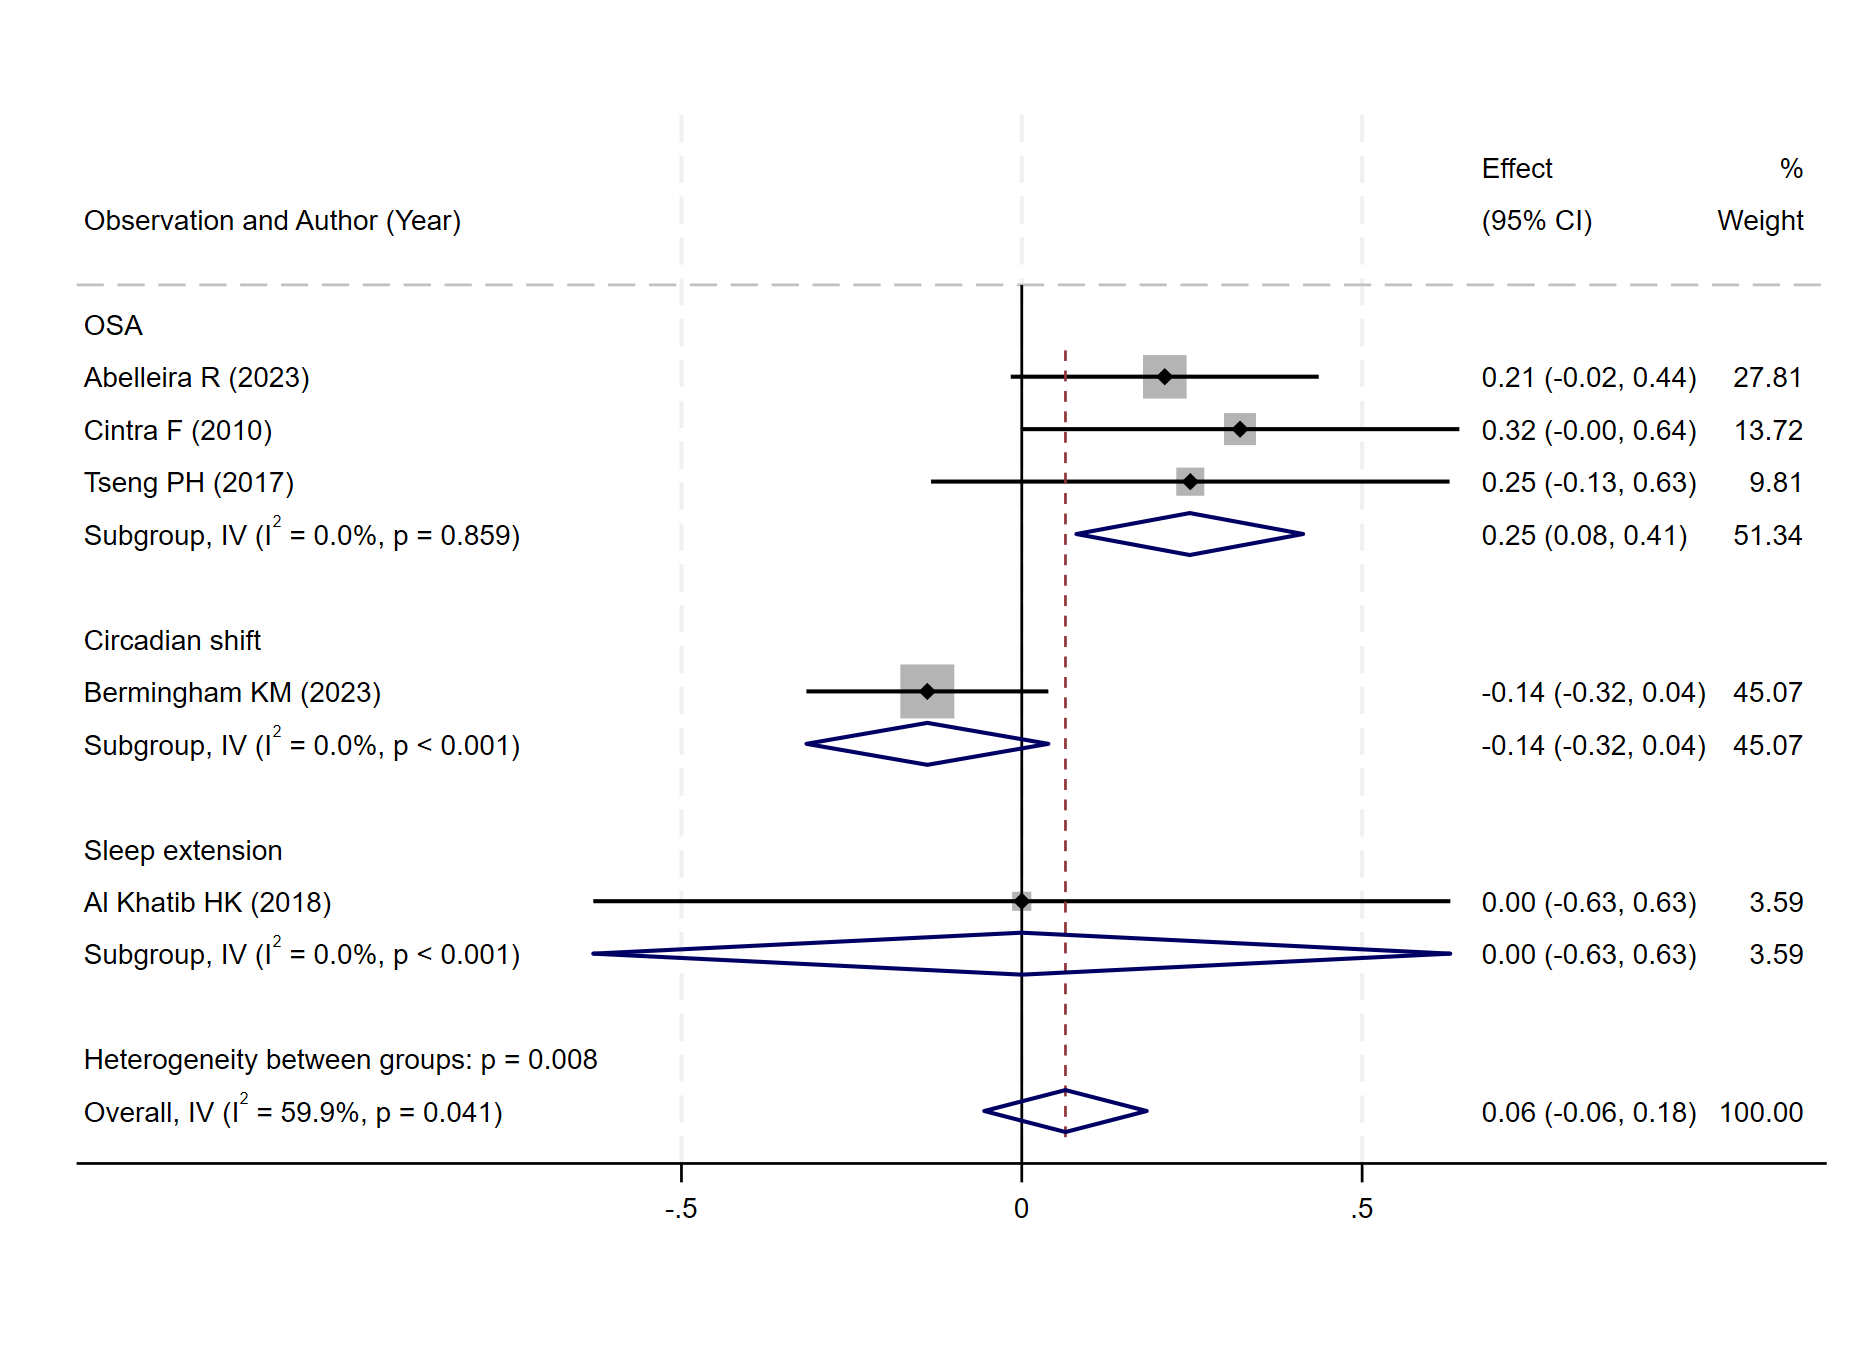


- - 1. By region, random effects model


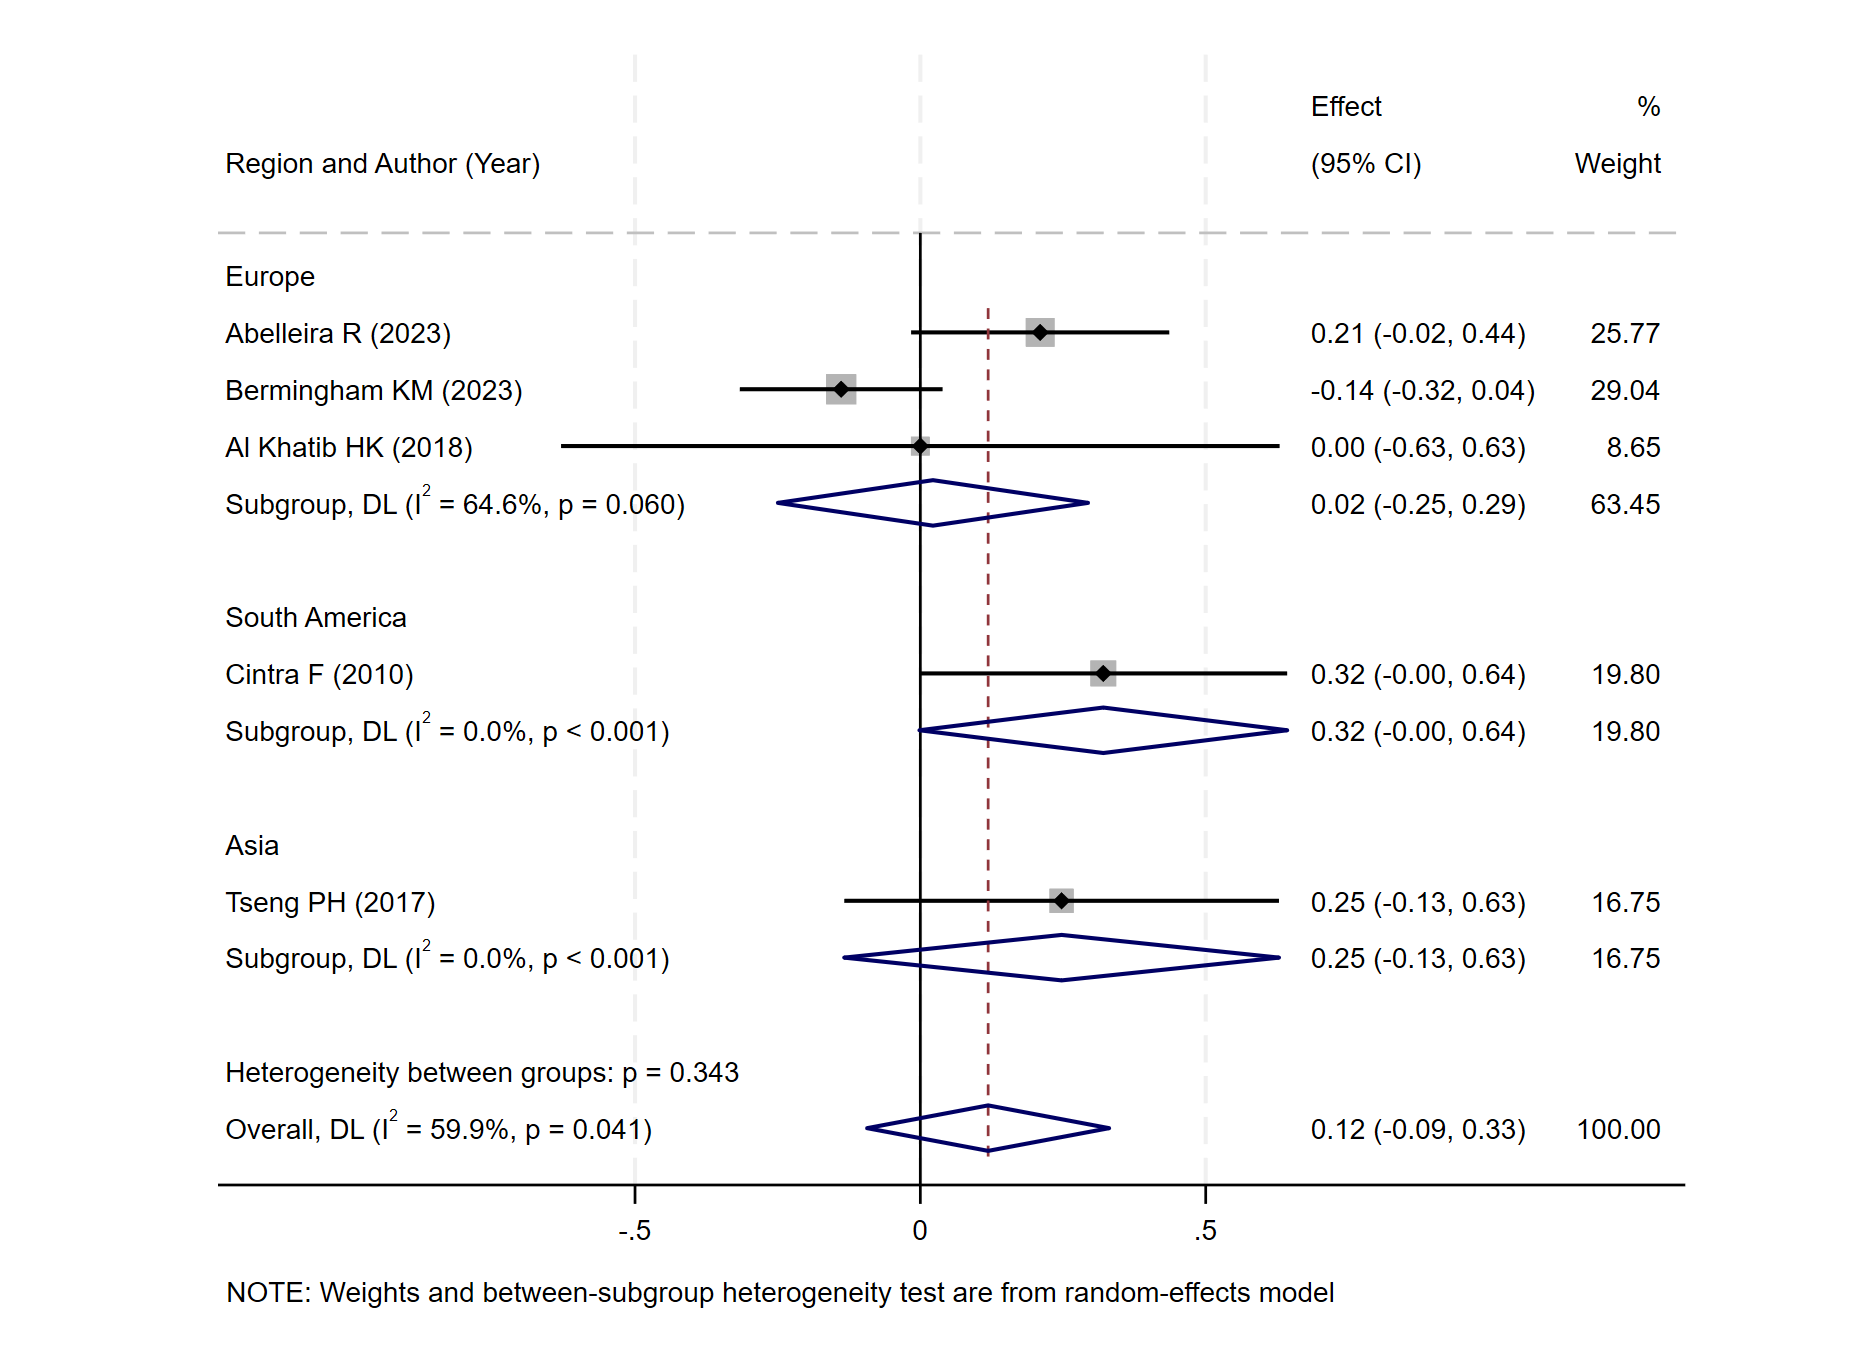


- - 1. By gender ratio (N(male)/N(female) > 1.5 = 1, ≤ 1.5 = 0), random effects model


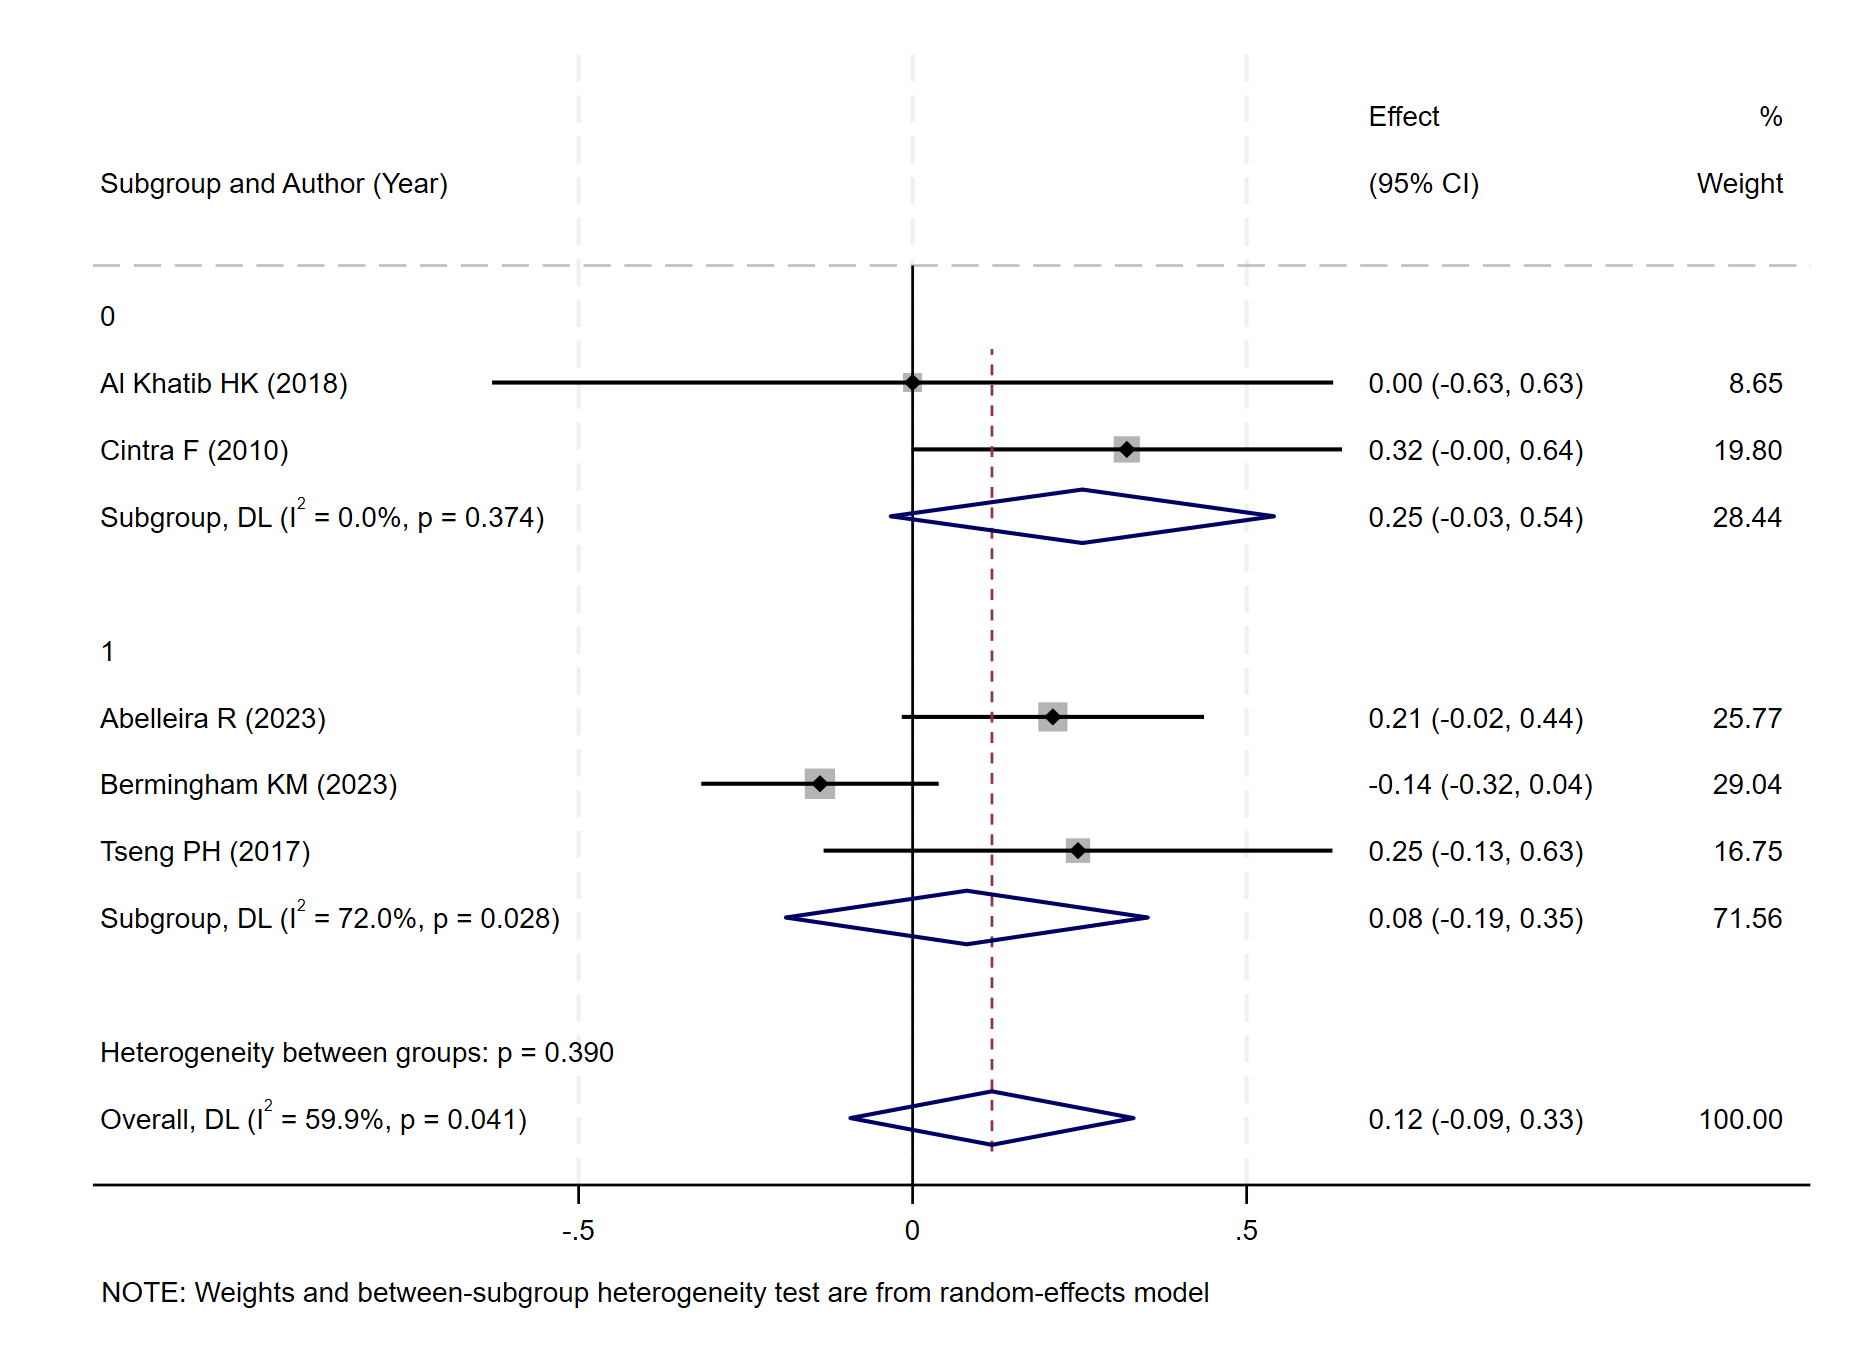


By gender ratio - N(male)/N(female) ≤ 1.5, fixed effects model


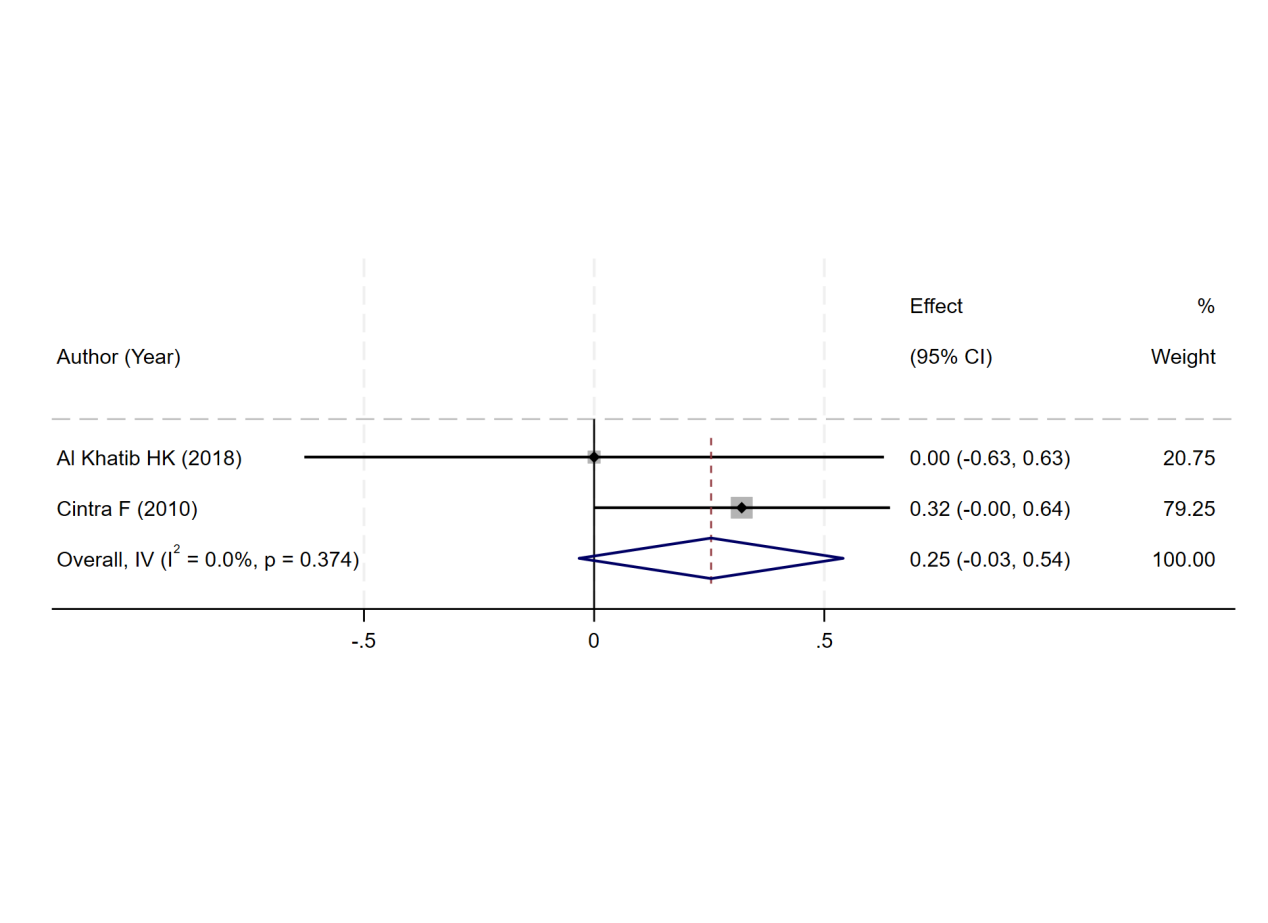


- - 1. By age range (mean value ≤ 30 = 0, mean > 30 = 1), random effects model


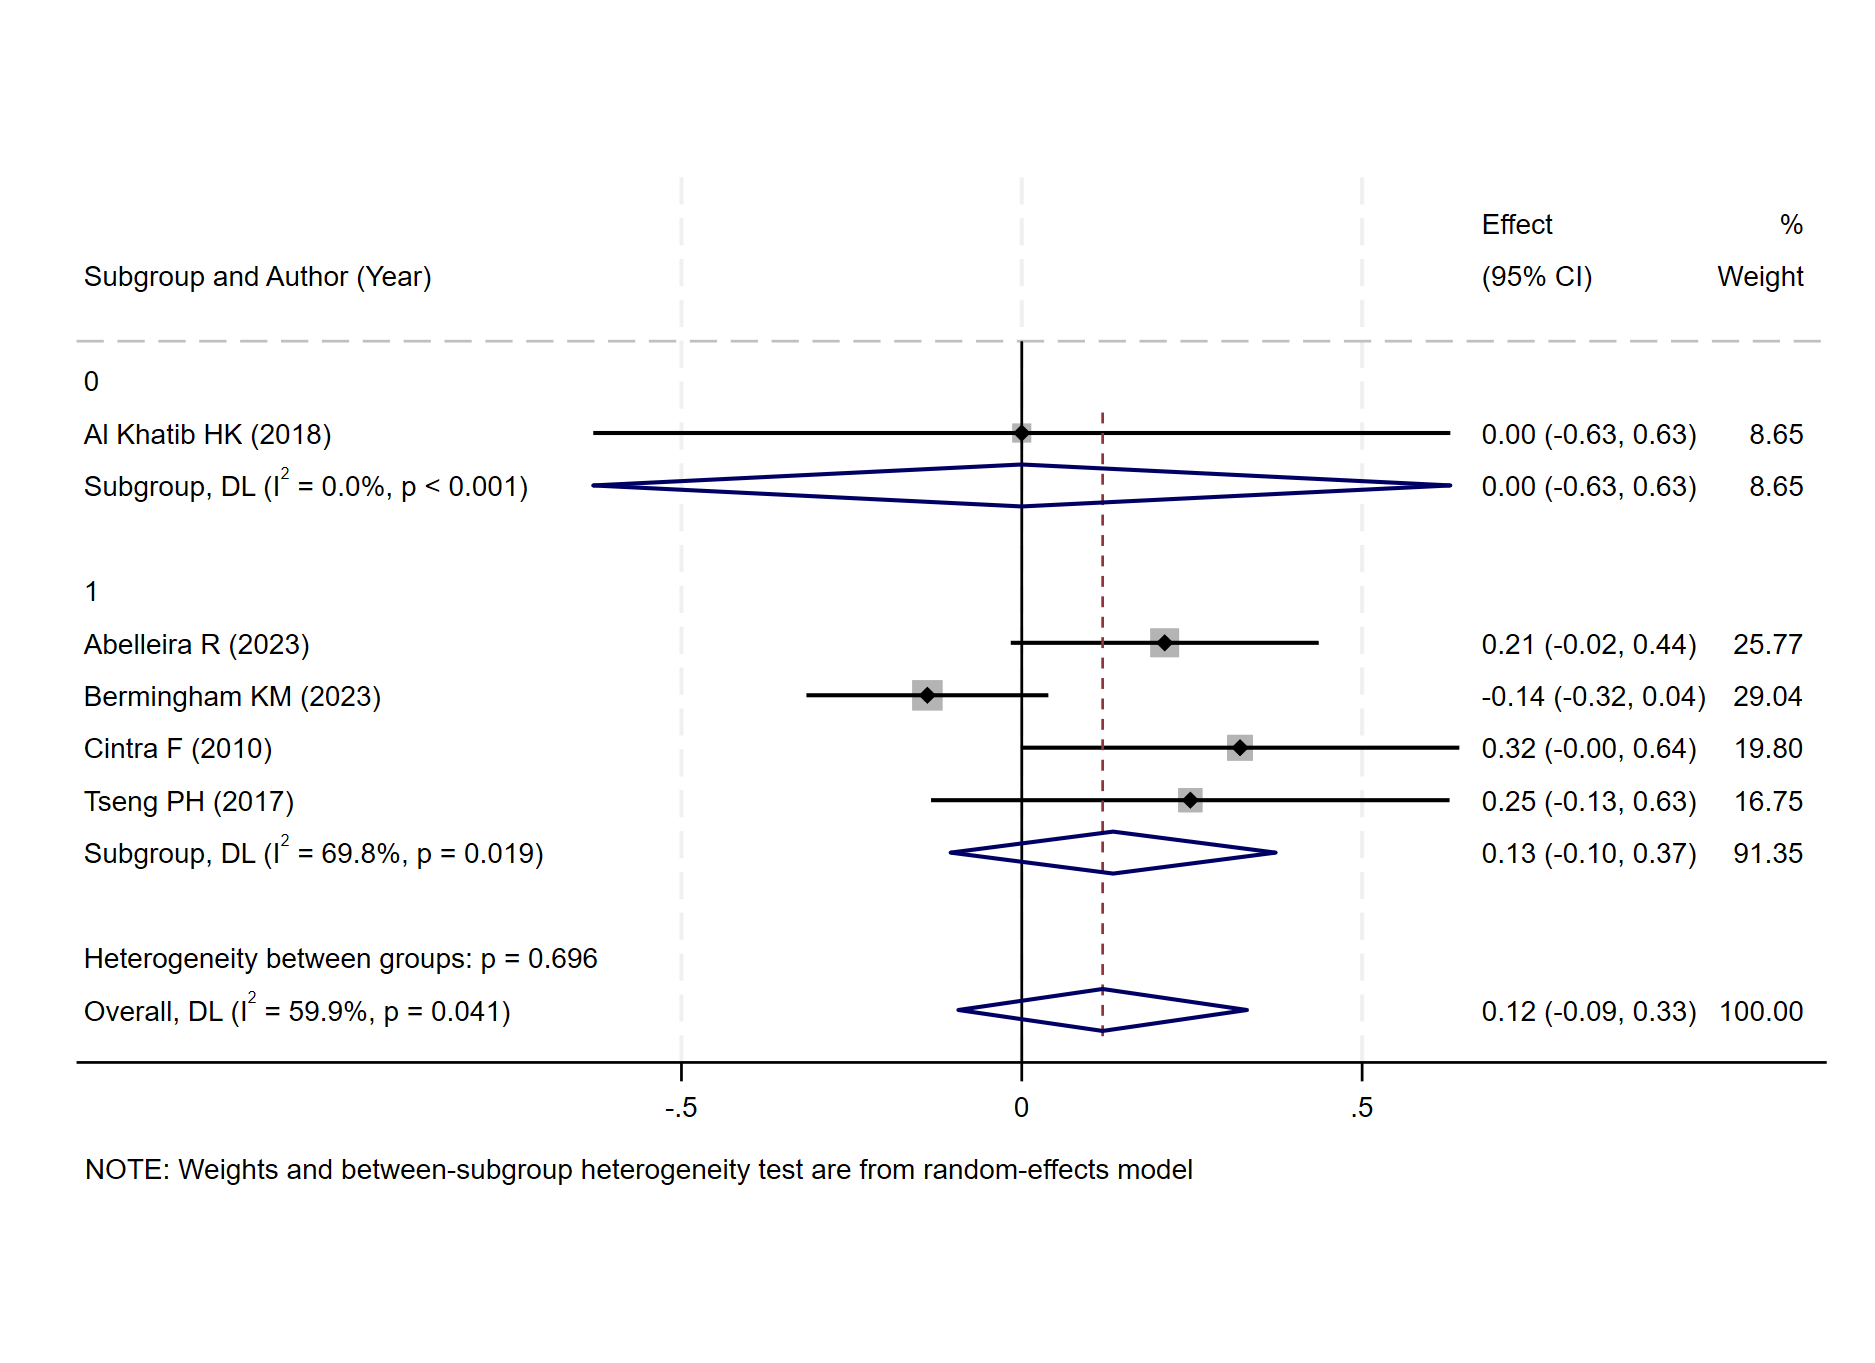


- 1. HDL
     1. By observation, fixed effects model


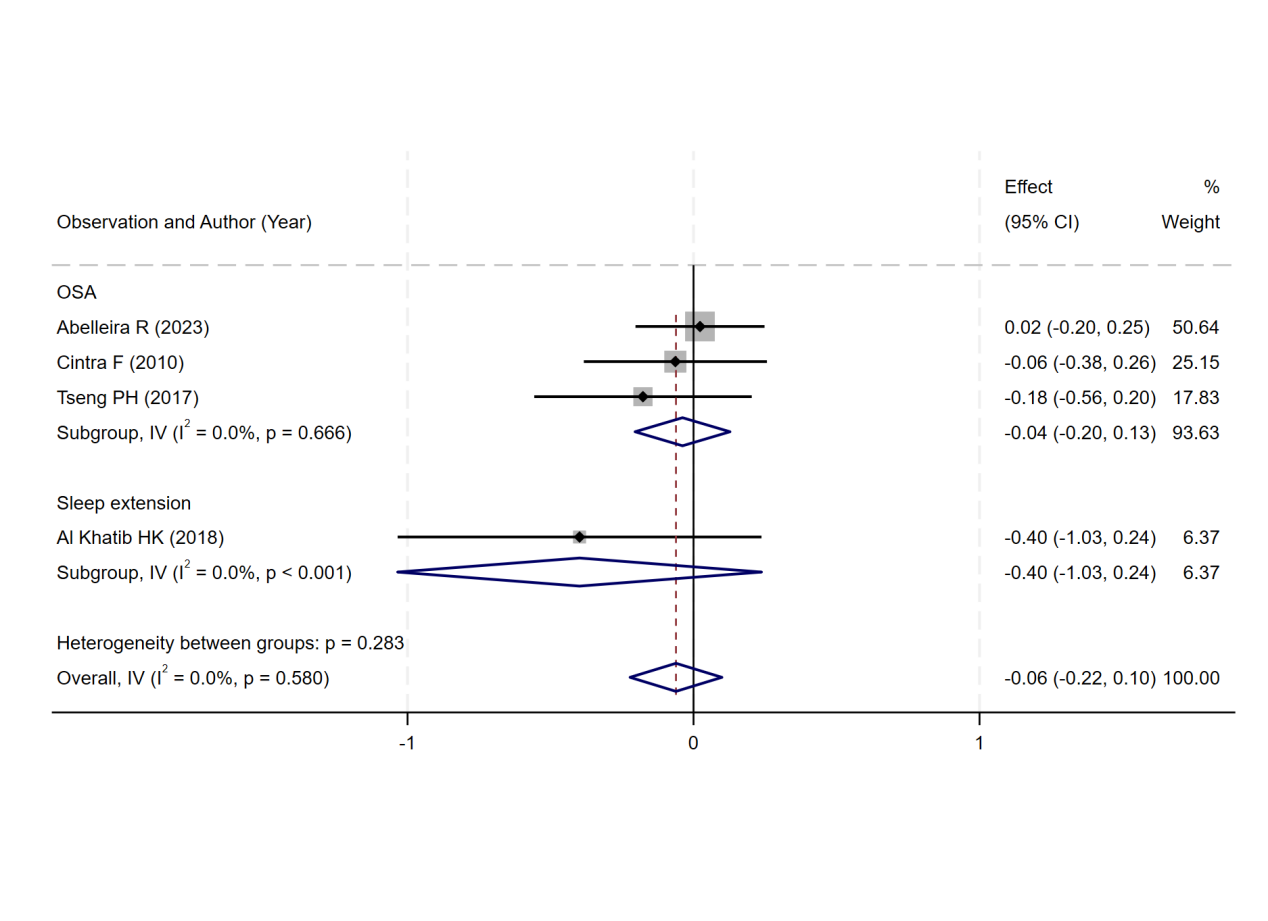


- - 1. By region, random effects model


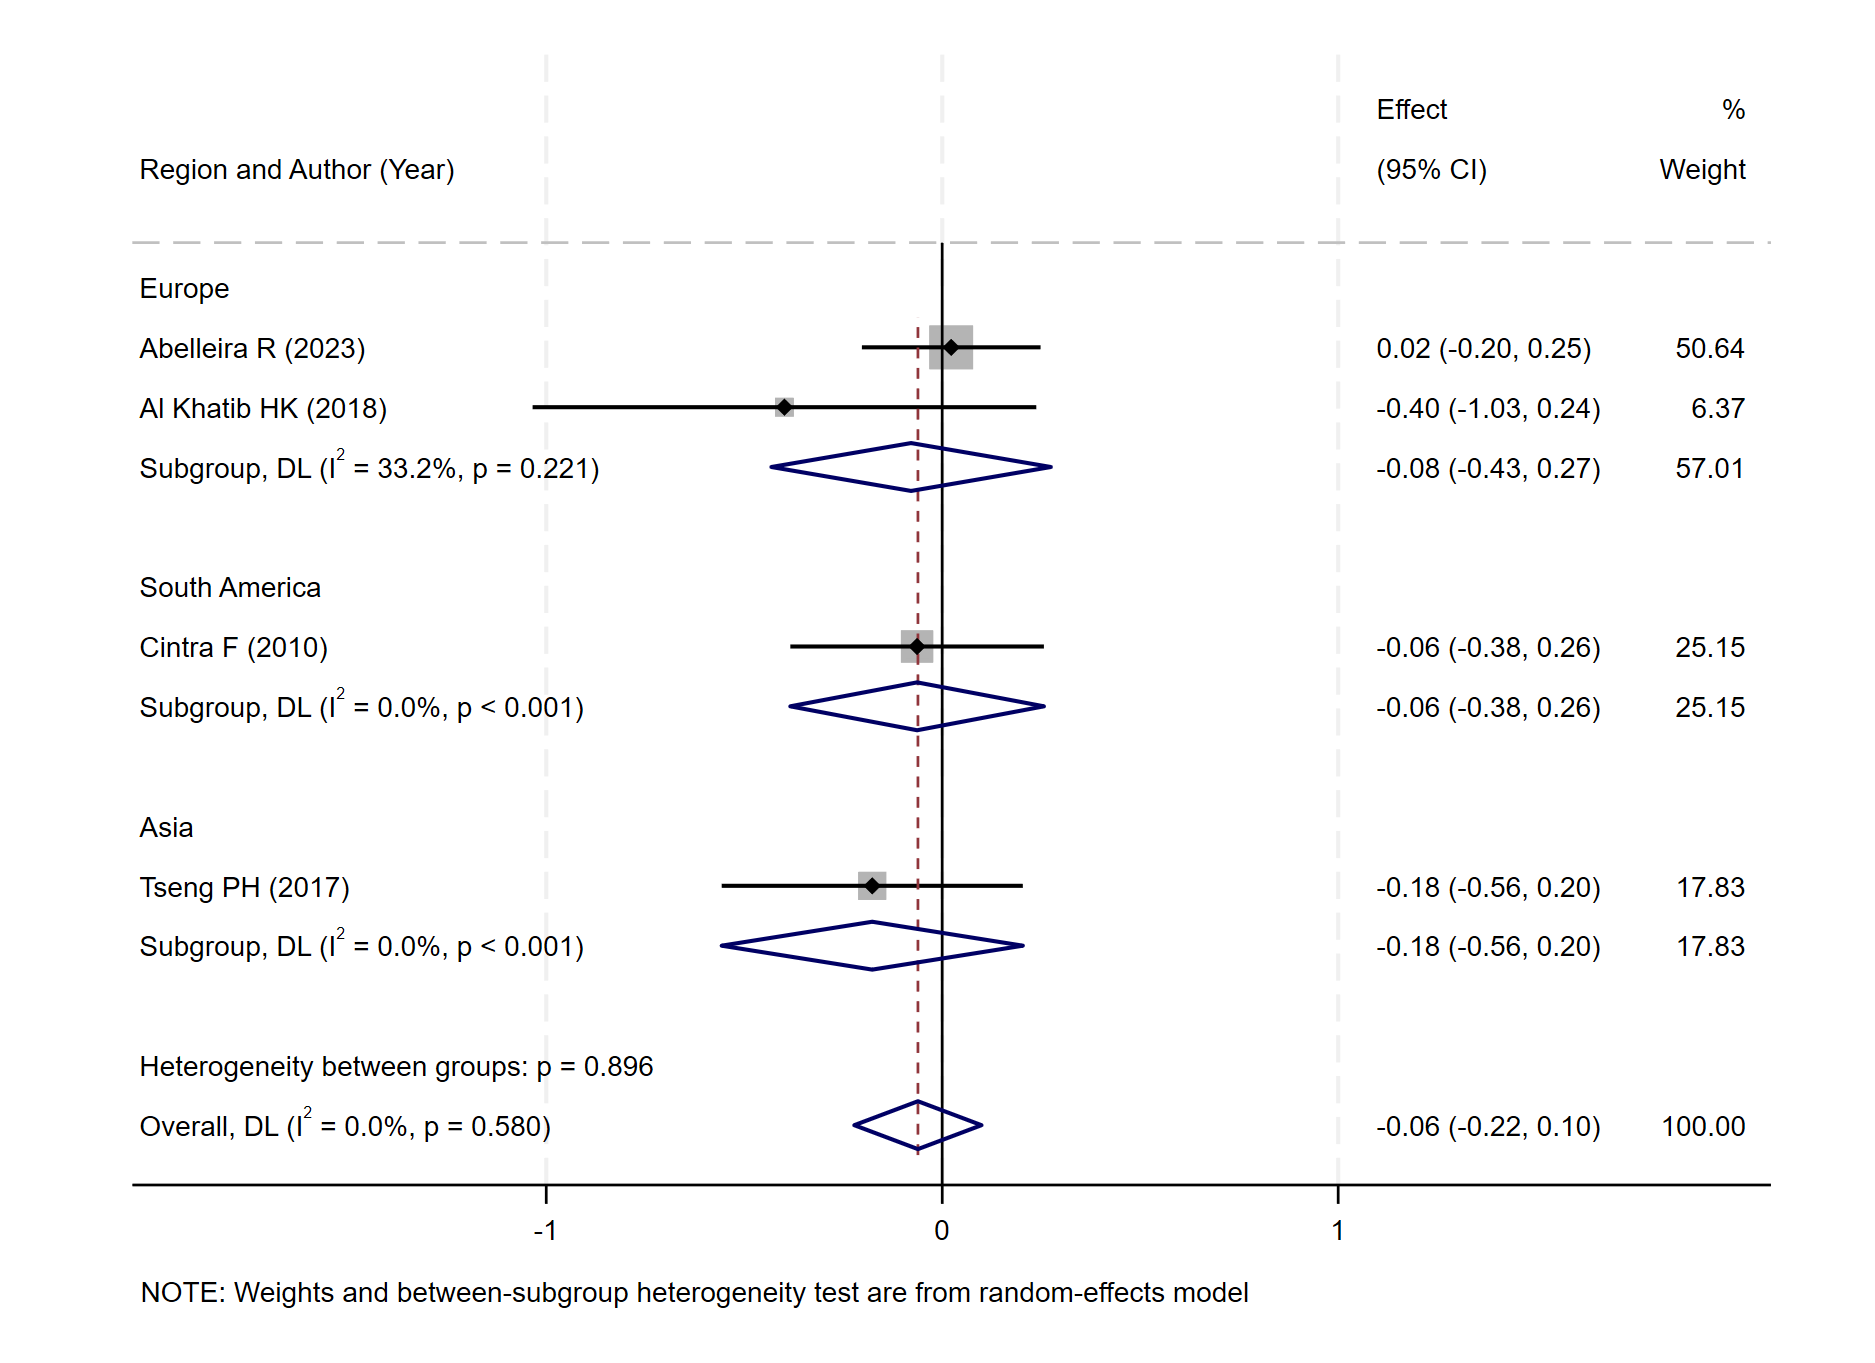


- - 1. By gender ratio (N(male)/N(female) > 1.5 = 1, ≤ 1.5 = 0), fixed effects model


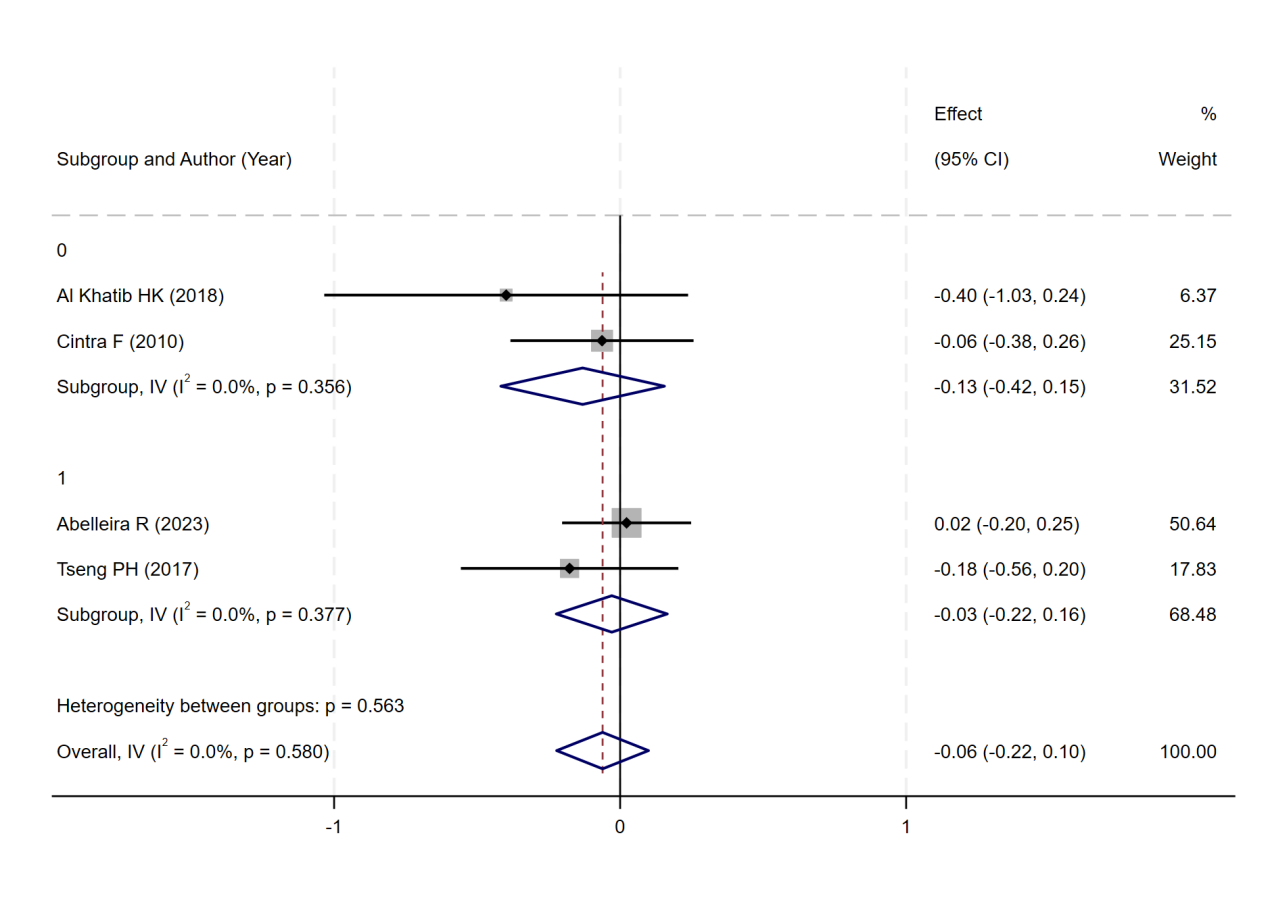


- - 1. By age range (mean value ≤ 30 = 0, mean > 30 = 1), fixed effects model


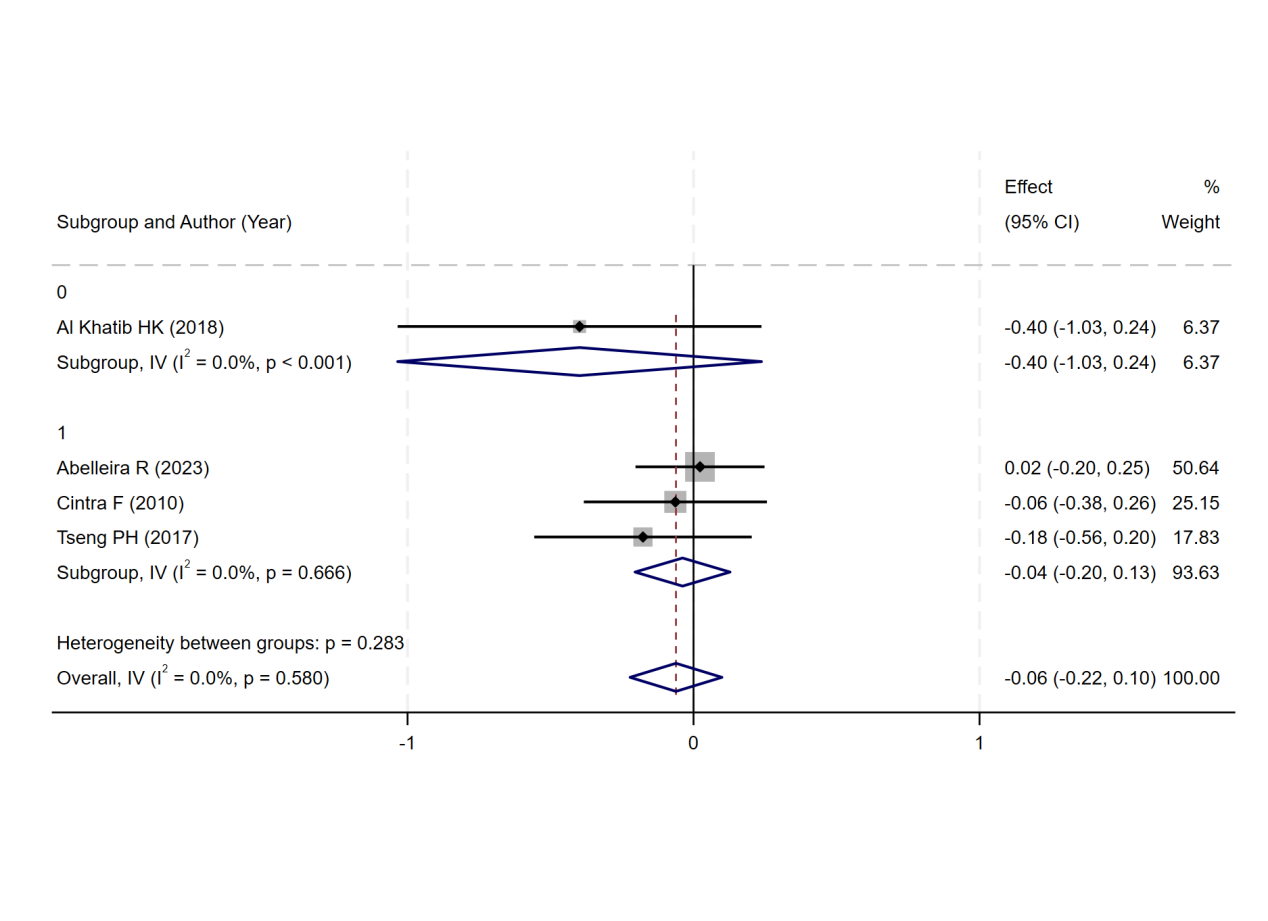


- 1. Total cholesterol
     1. By observation, fixed effects model


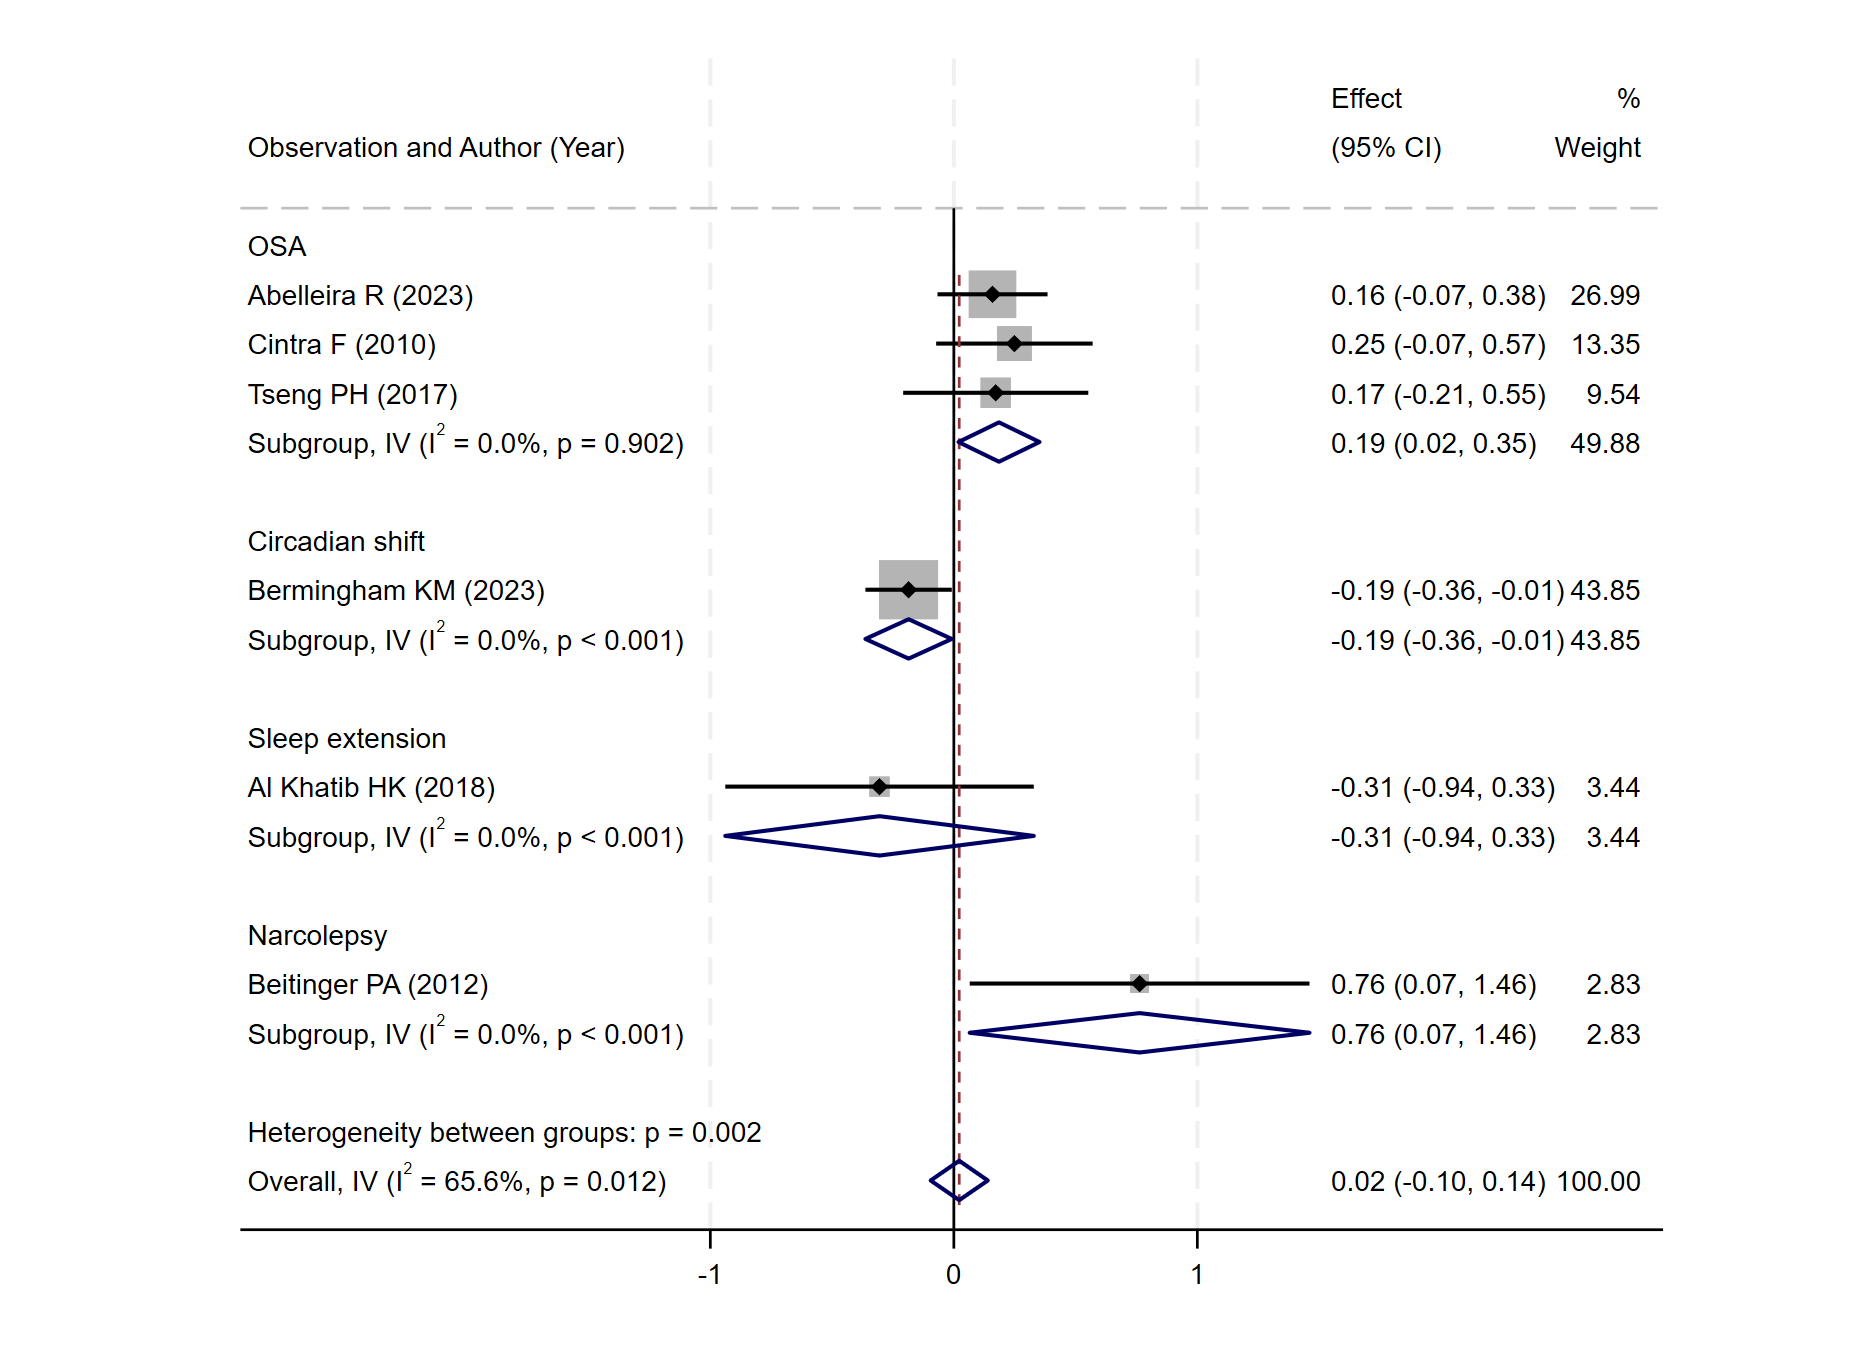


- - 1. By region, random effects model


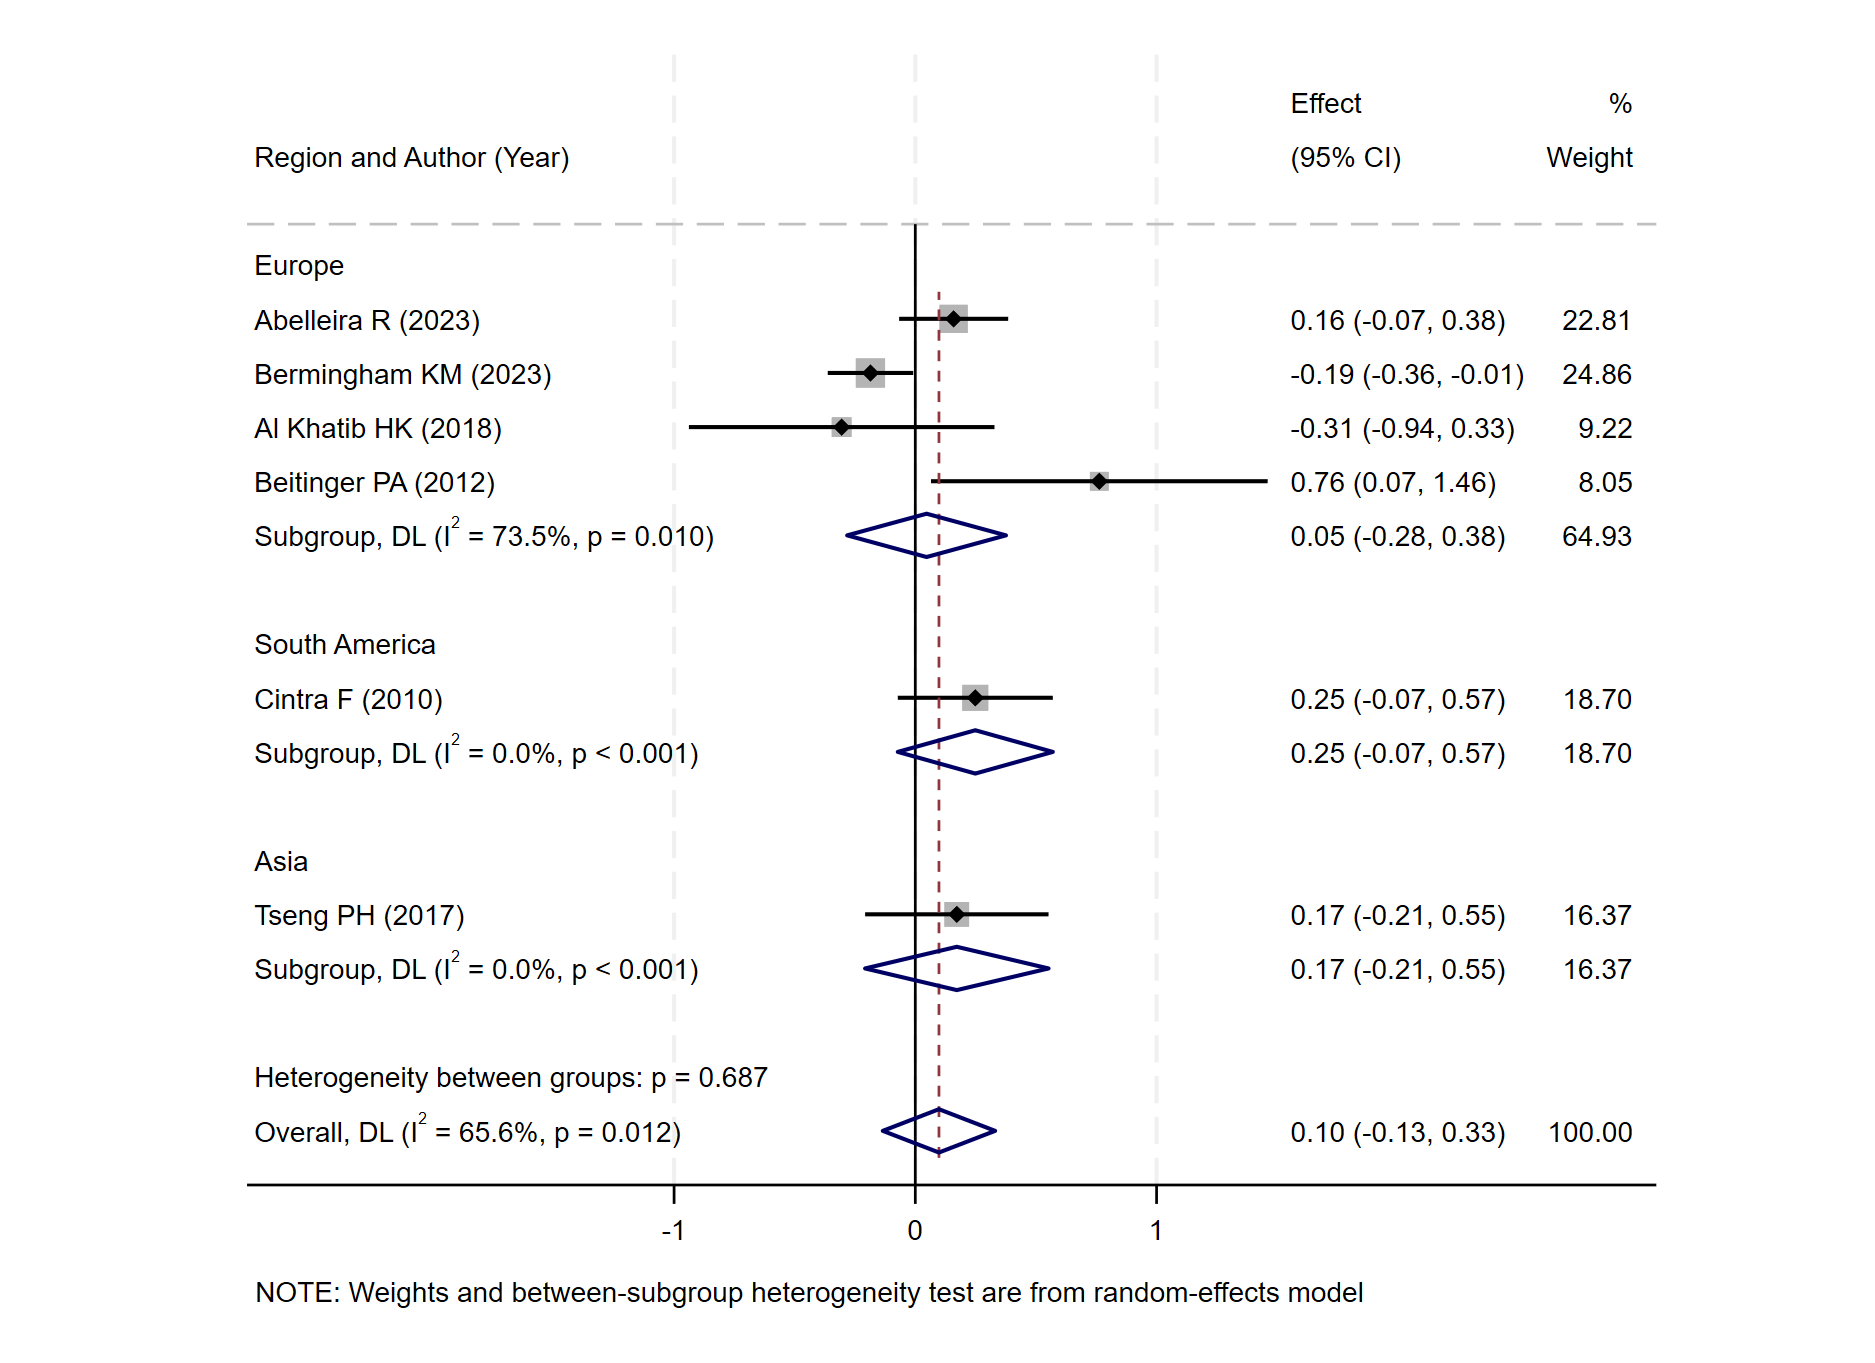


- - 1. By gender ratio (N(male)/N(female) > 1.5 = 1, ≤ 1.5 = 0), random effects model


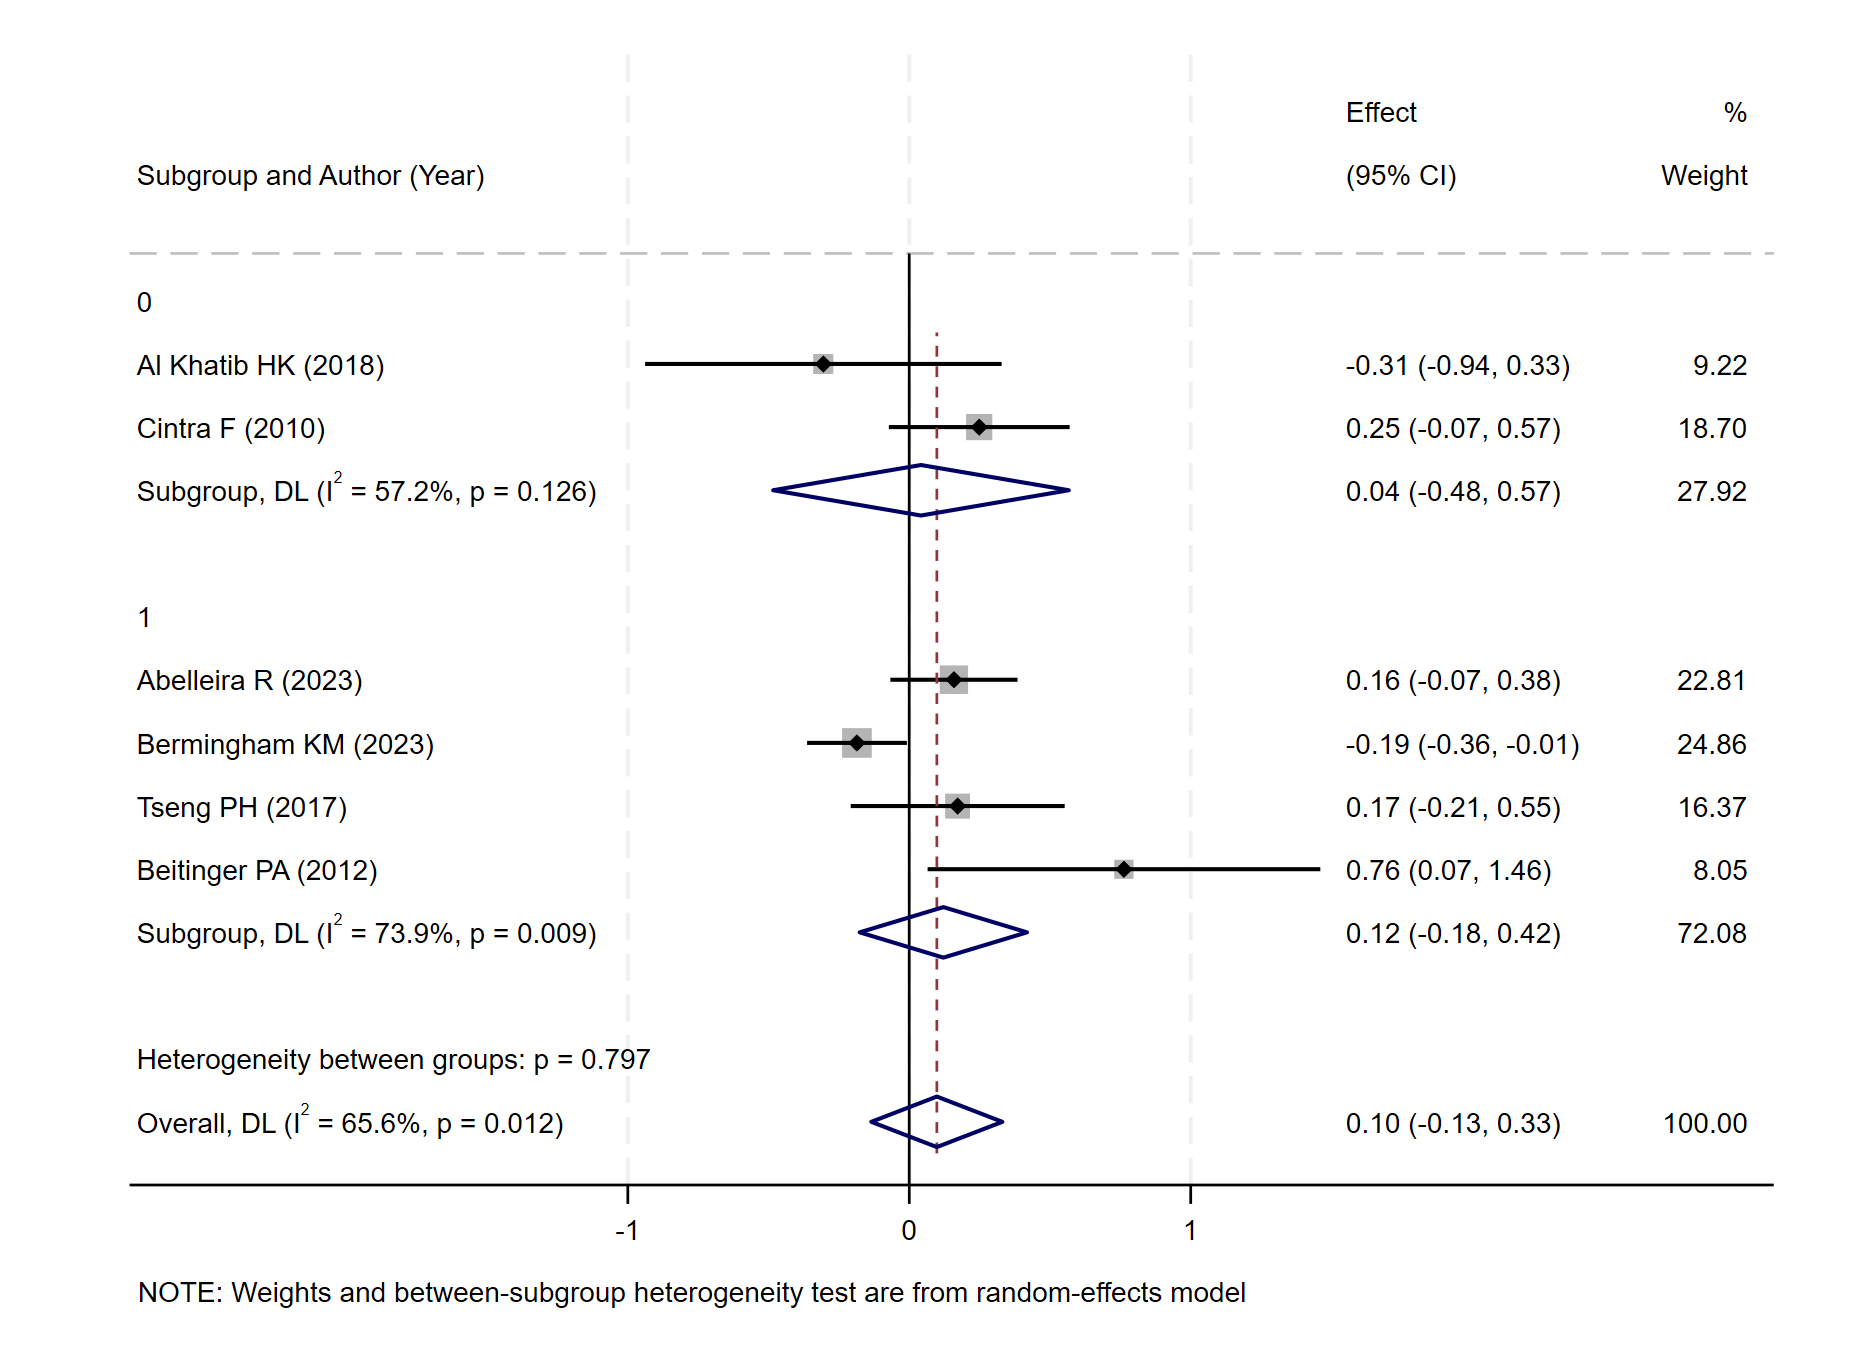


- - 1. By age range (mean value ≤ 30 = 0, mean > 30 = 1), random effects model


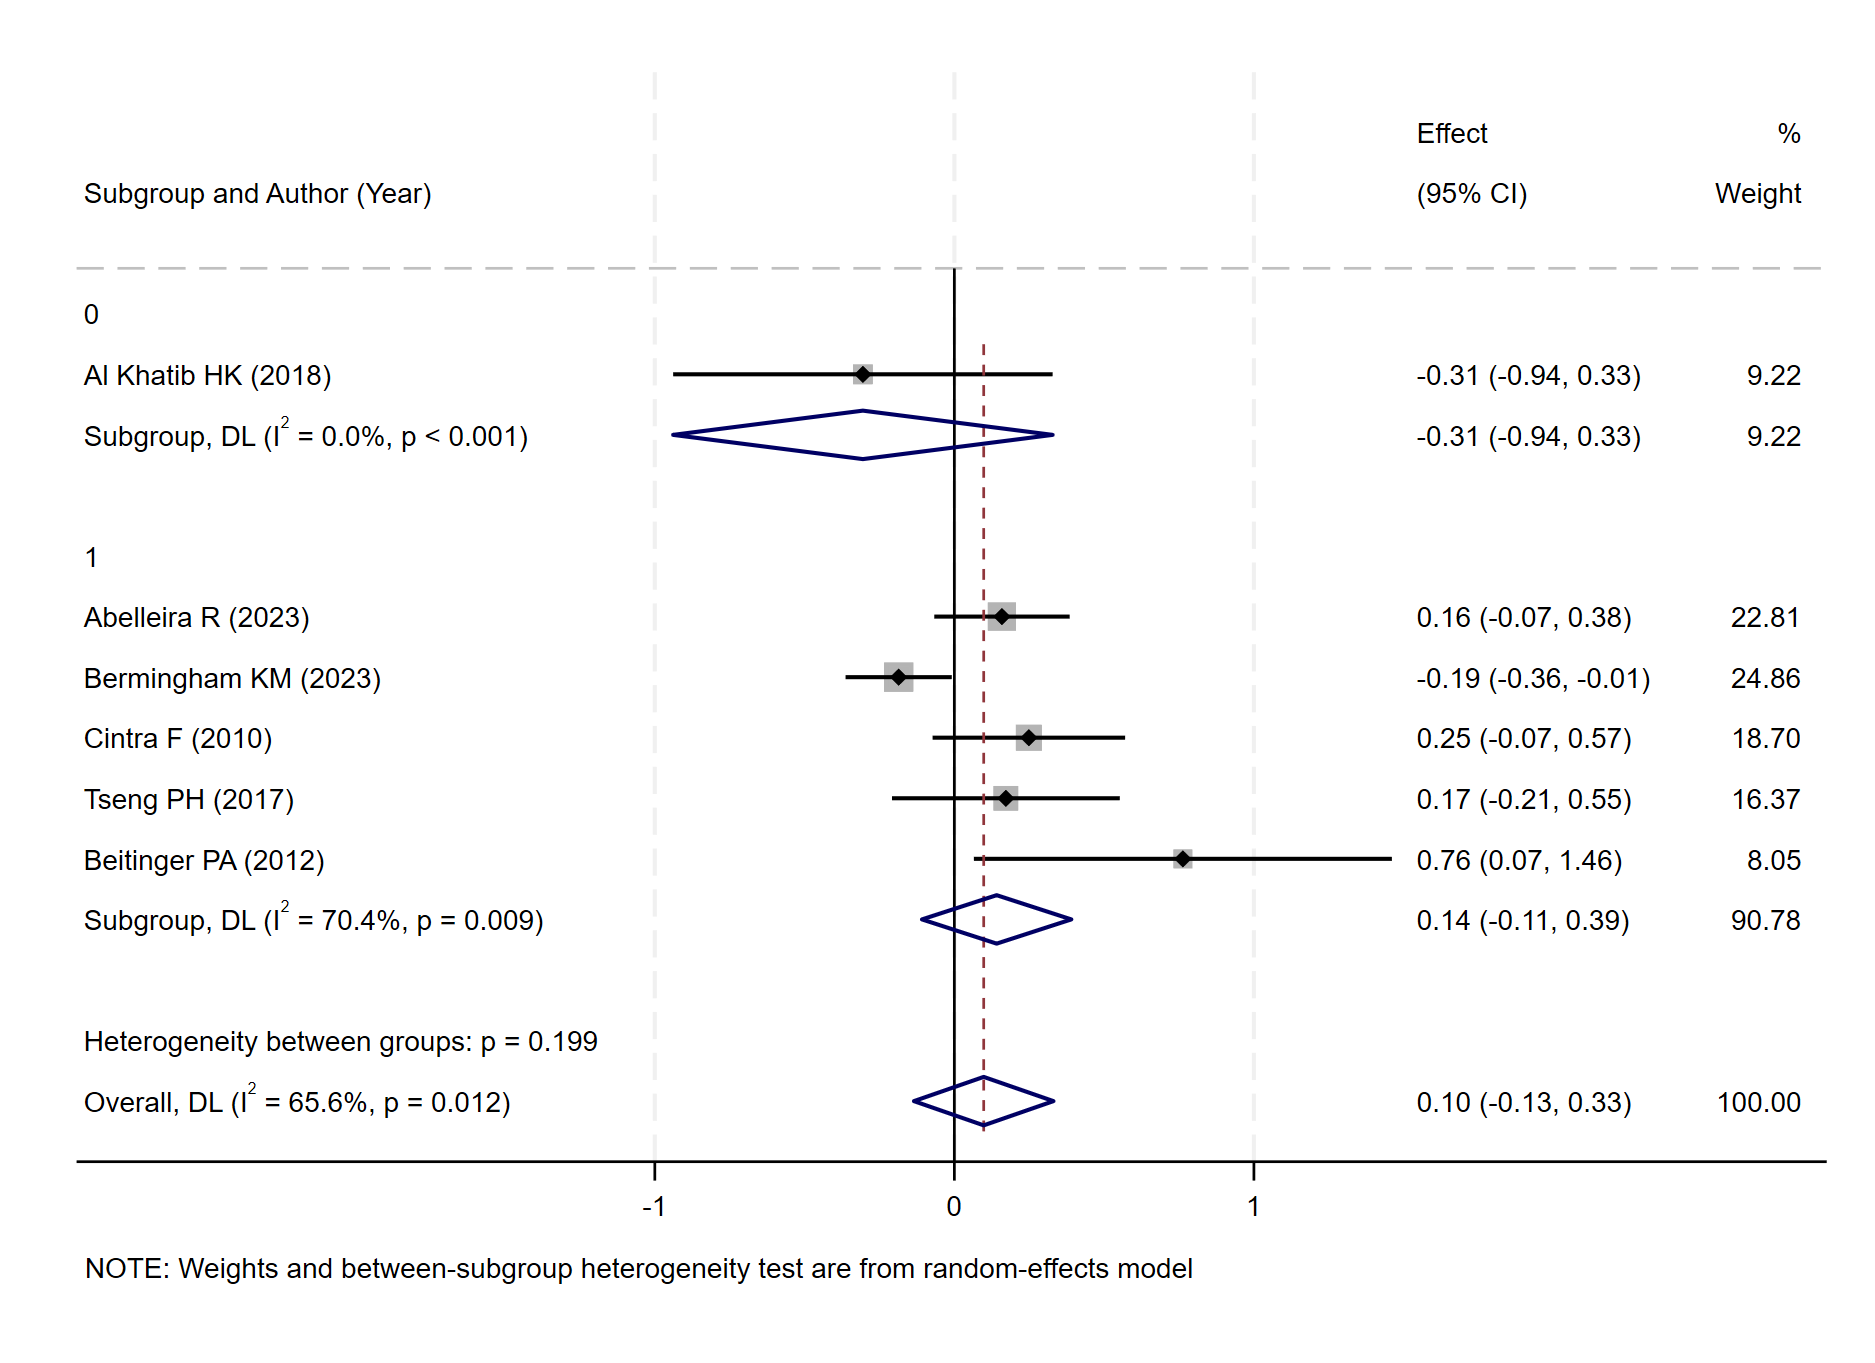


- 1. Total triglycerides
     1. By observation, fixed effects model


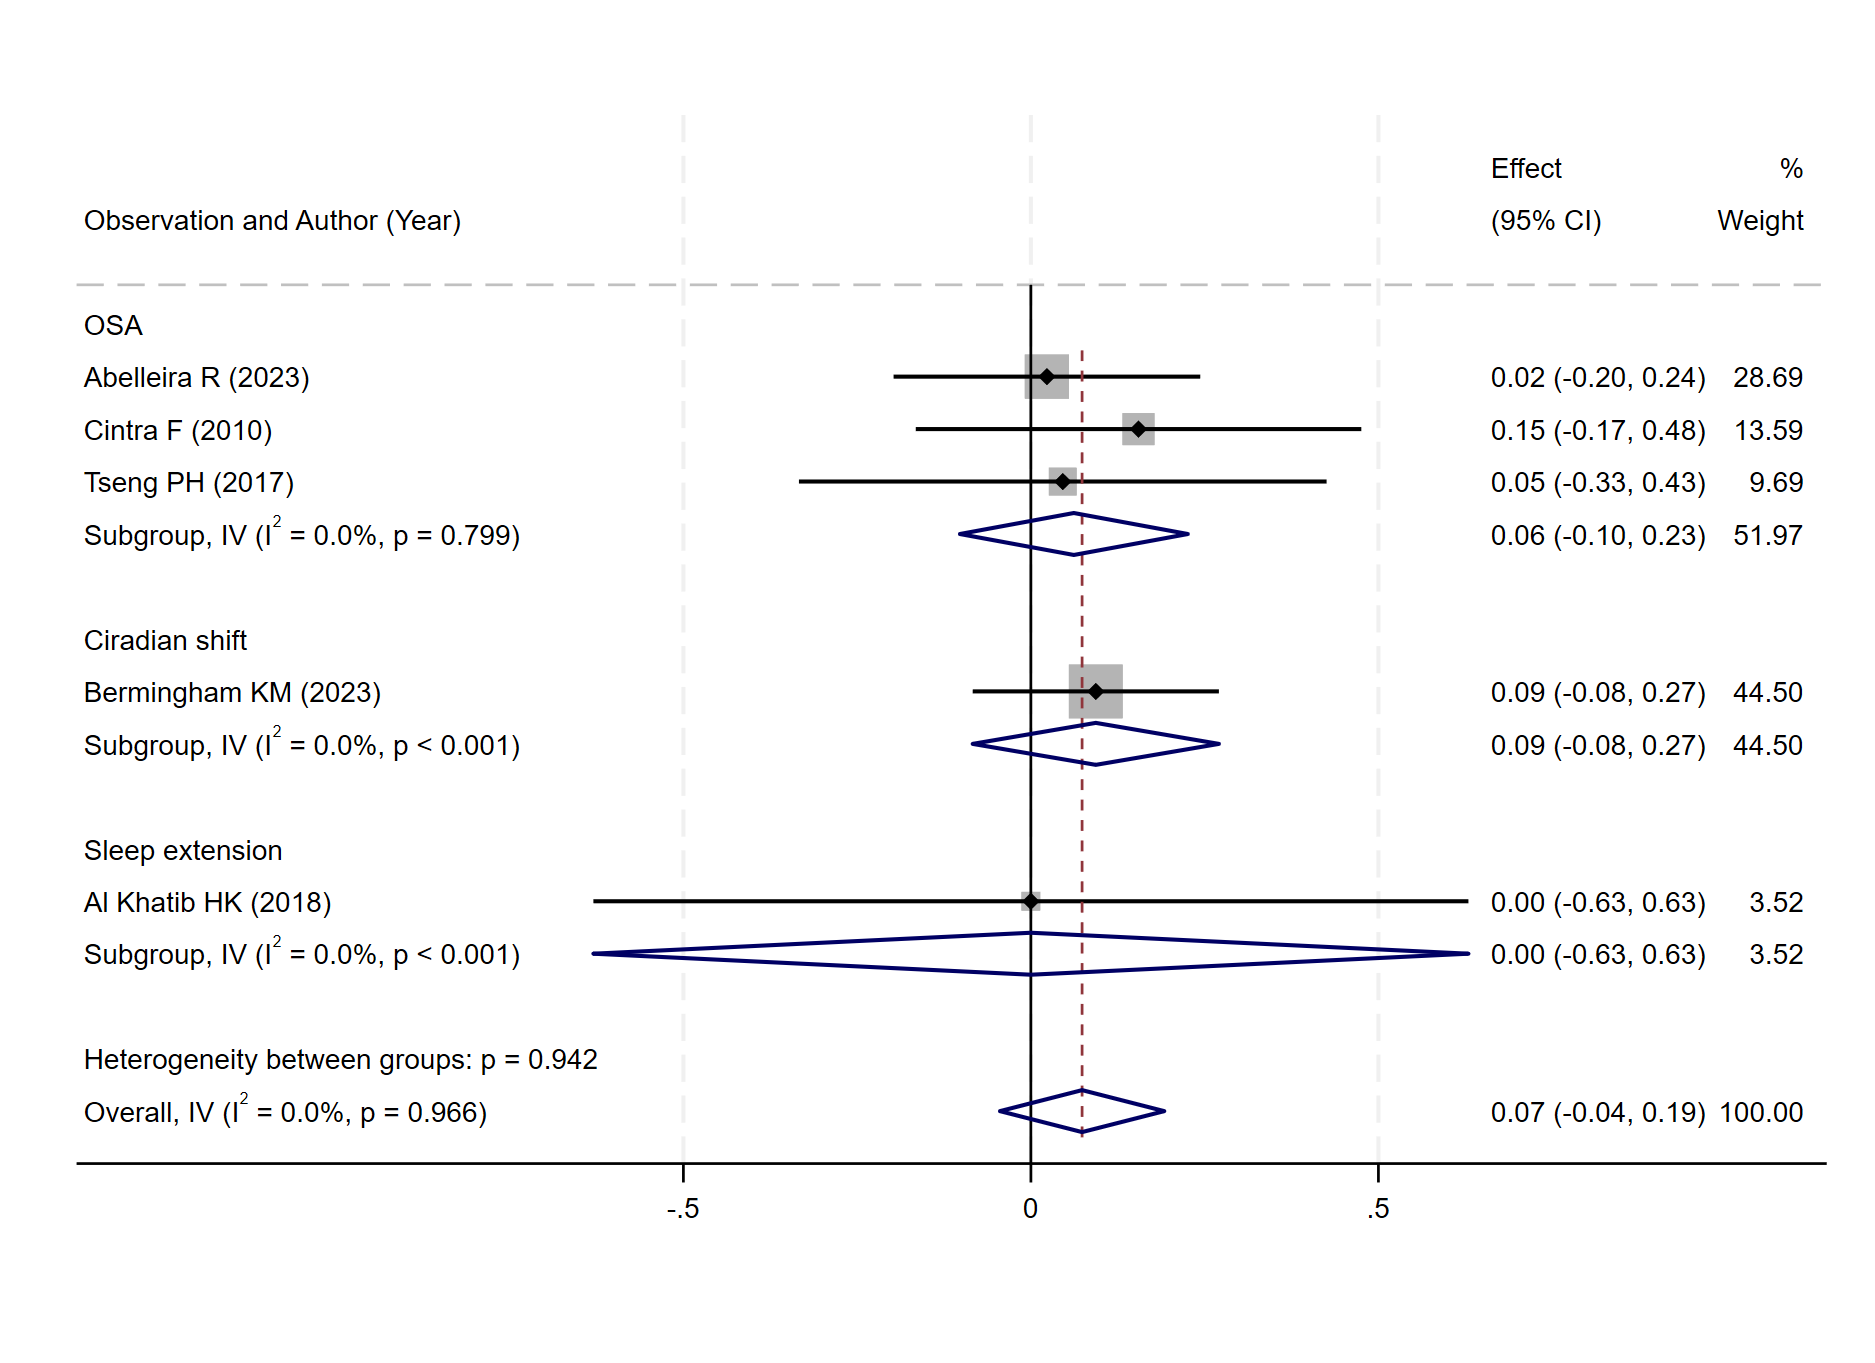


- - 1. By region, fixed effects model


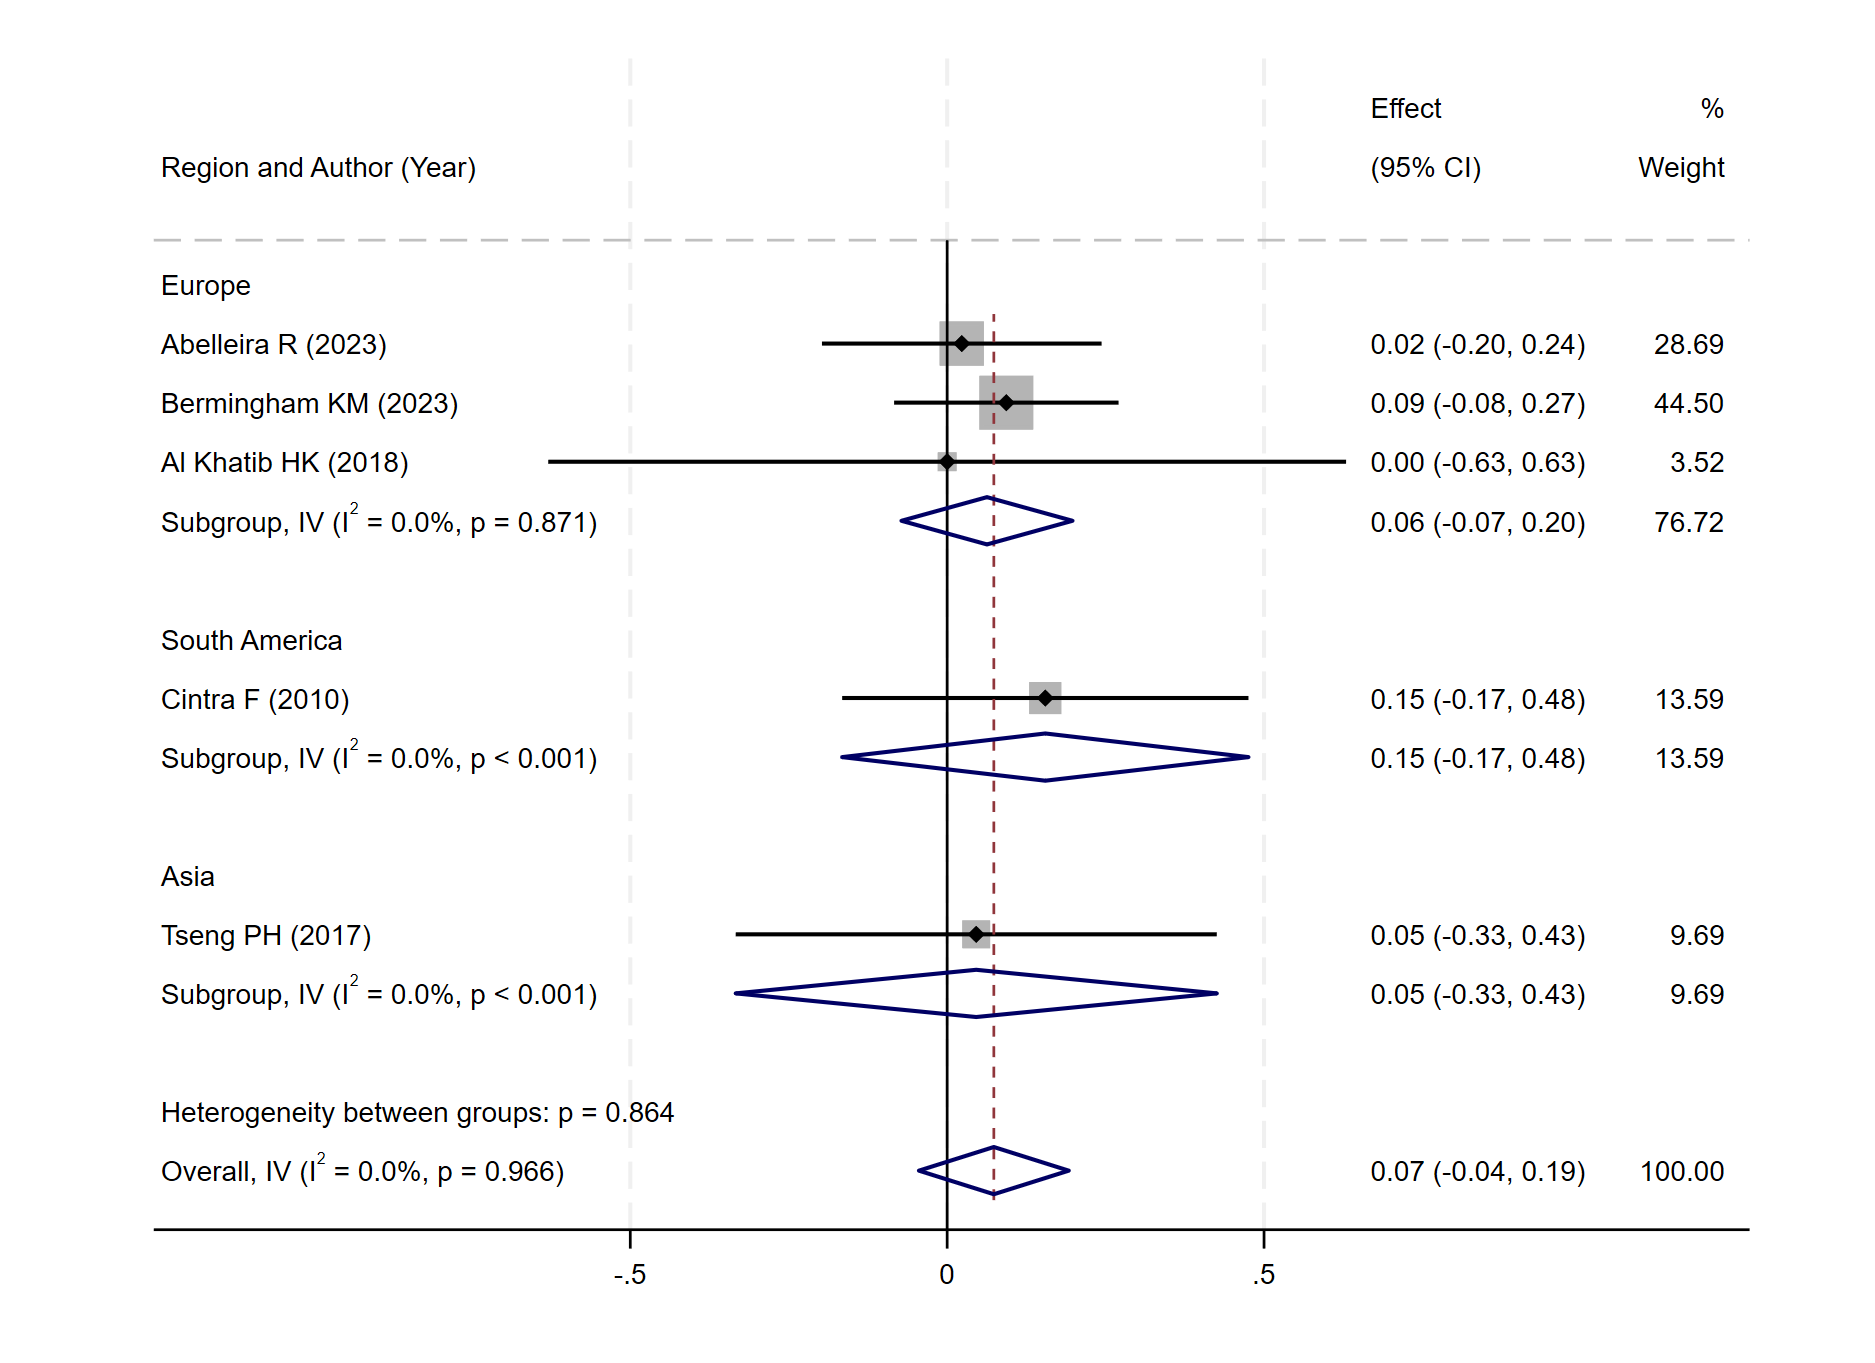


- - 1. By gender ratio (N(male)/N(female) > 1.5 = 1, ≤ 1.5 = 0), fixed effects model


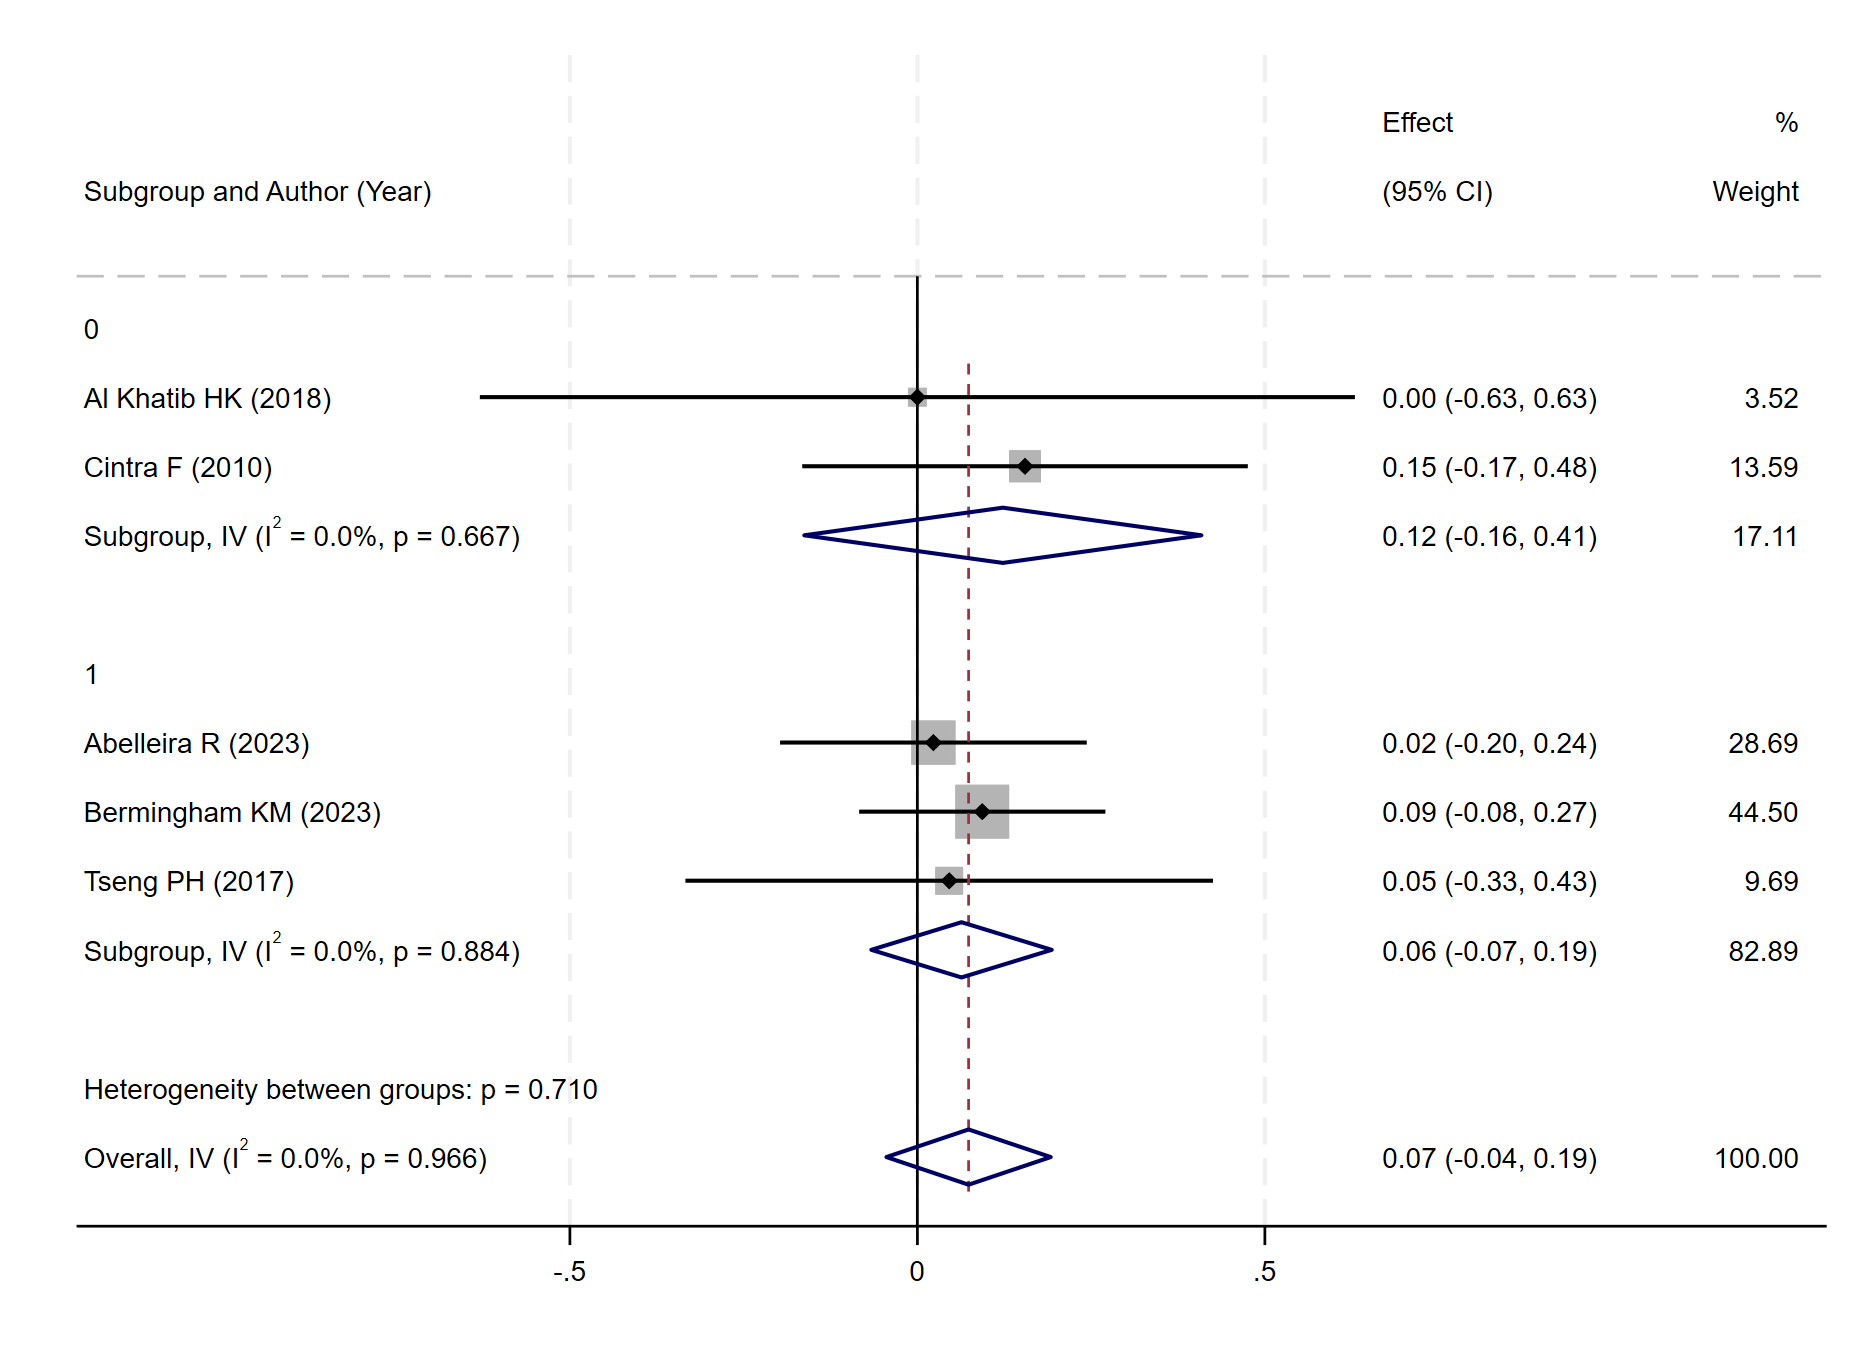


- - 1. By age range (mean value ≤ 30 = 0, mean > 30 = 1), fixed effects model


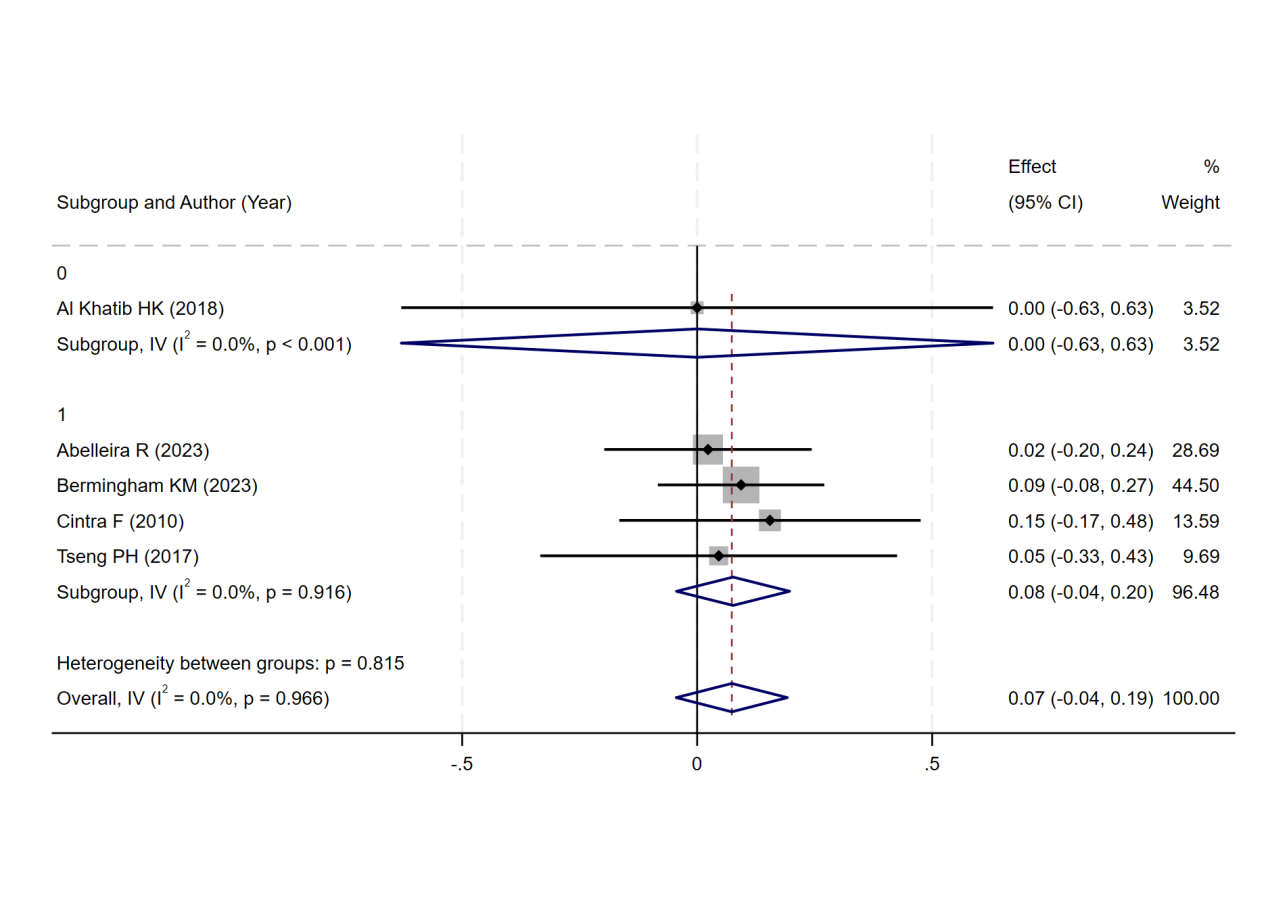


- 1. Leptin
     1. By observation, random effects model


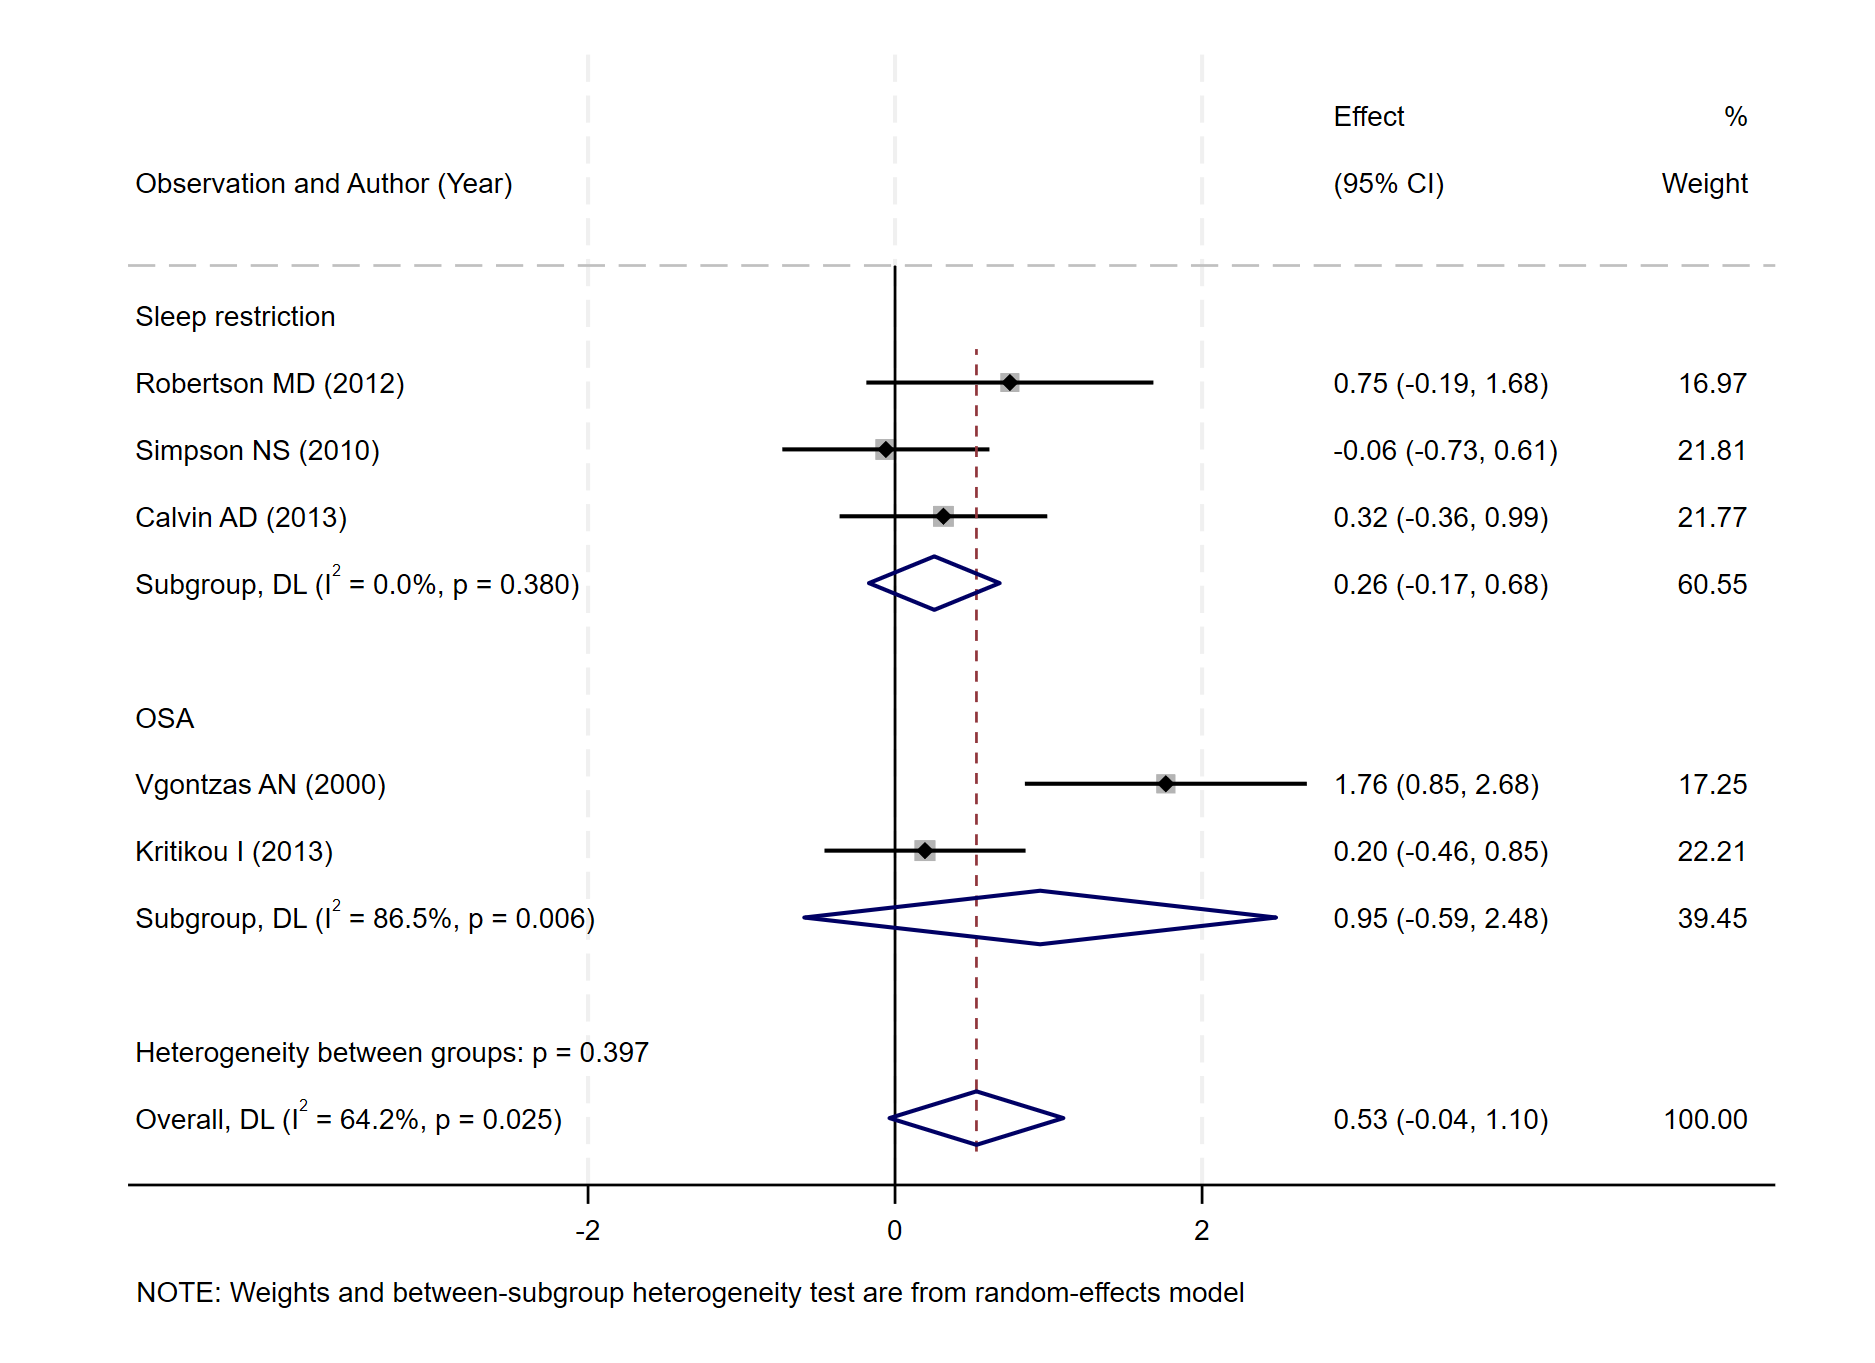


By observation - Sleep restriction, fixed effects model

**
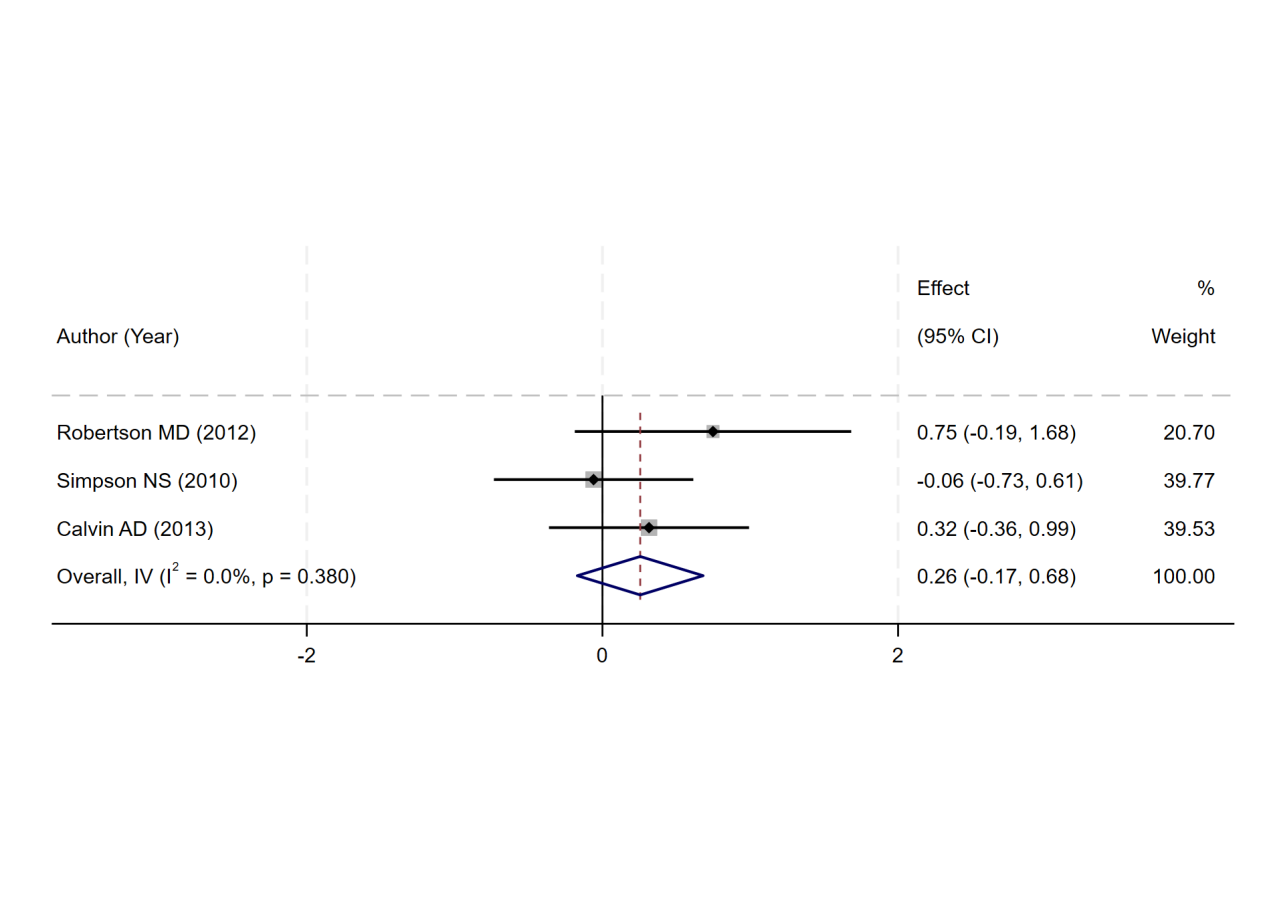
**

- - 1. By region, random effects model

**
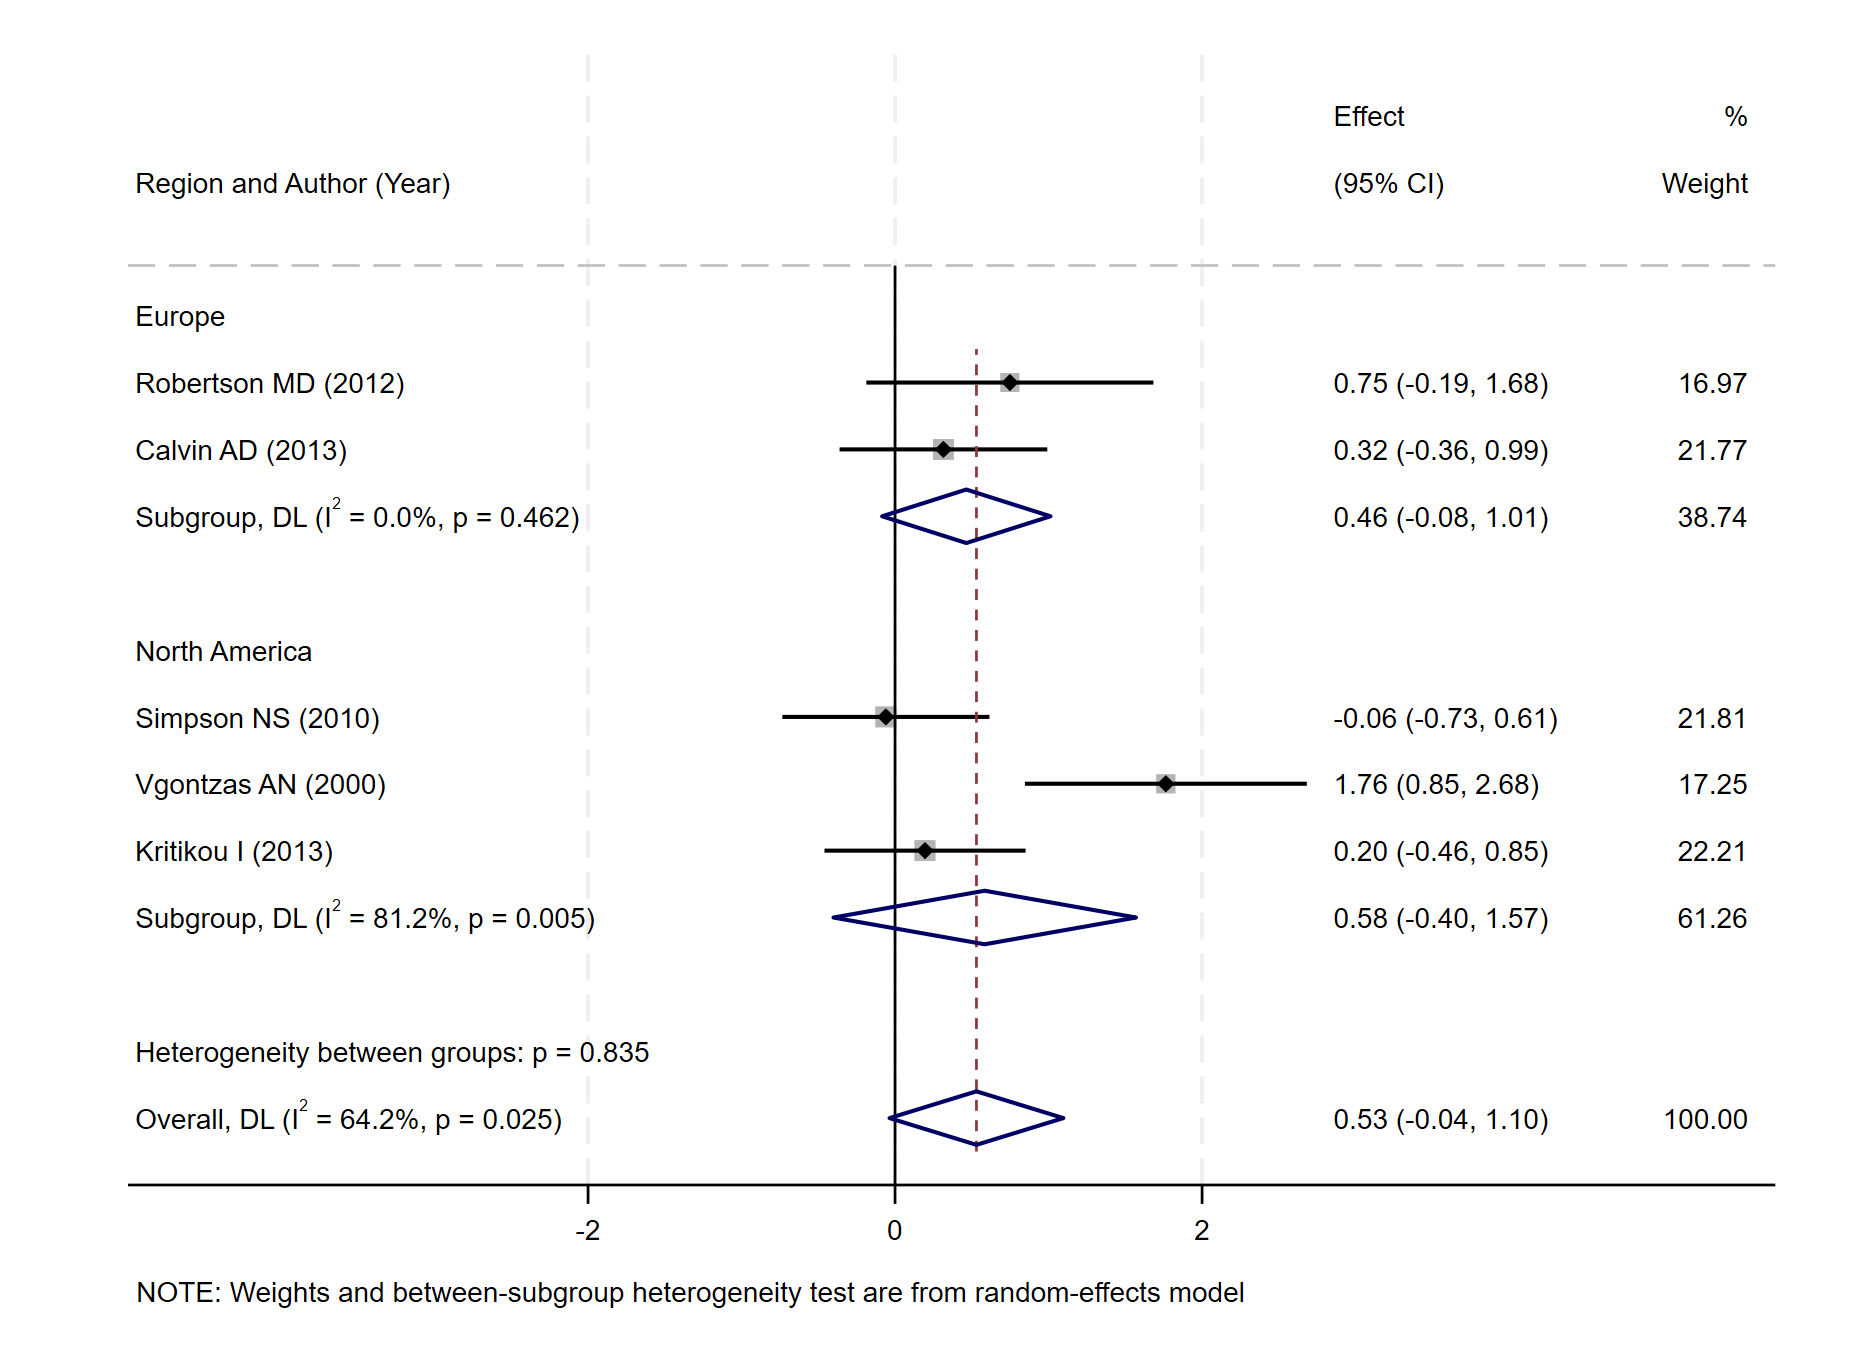
**

By region - Europe, fixed effects model


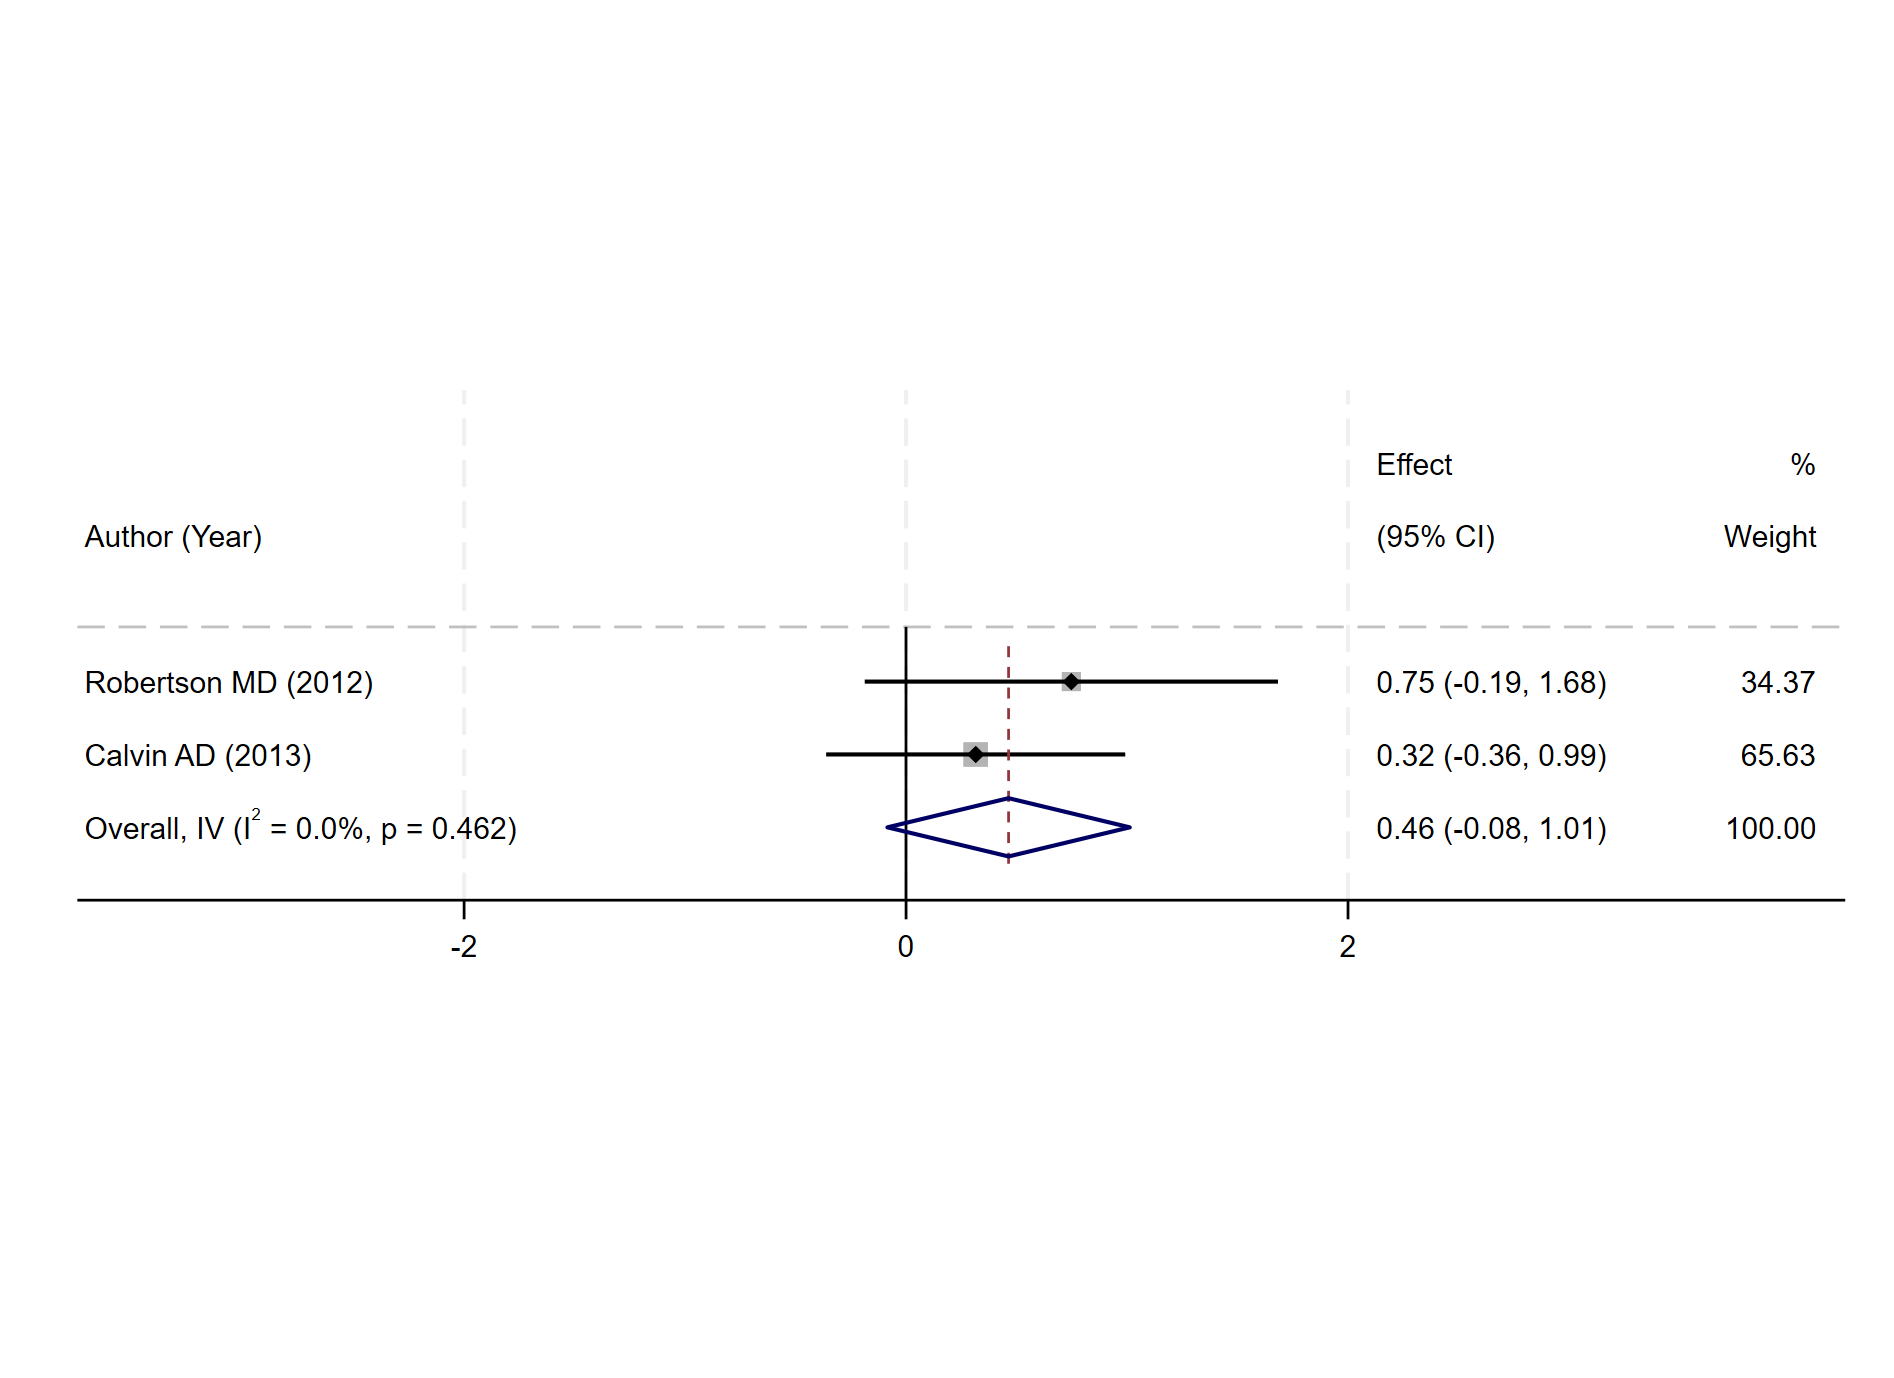


- - 1. By gender ratio (N(male)/N(female) > 1.5 = 1, ≤ 1.5 = 0), random effects model


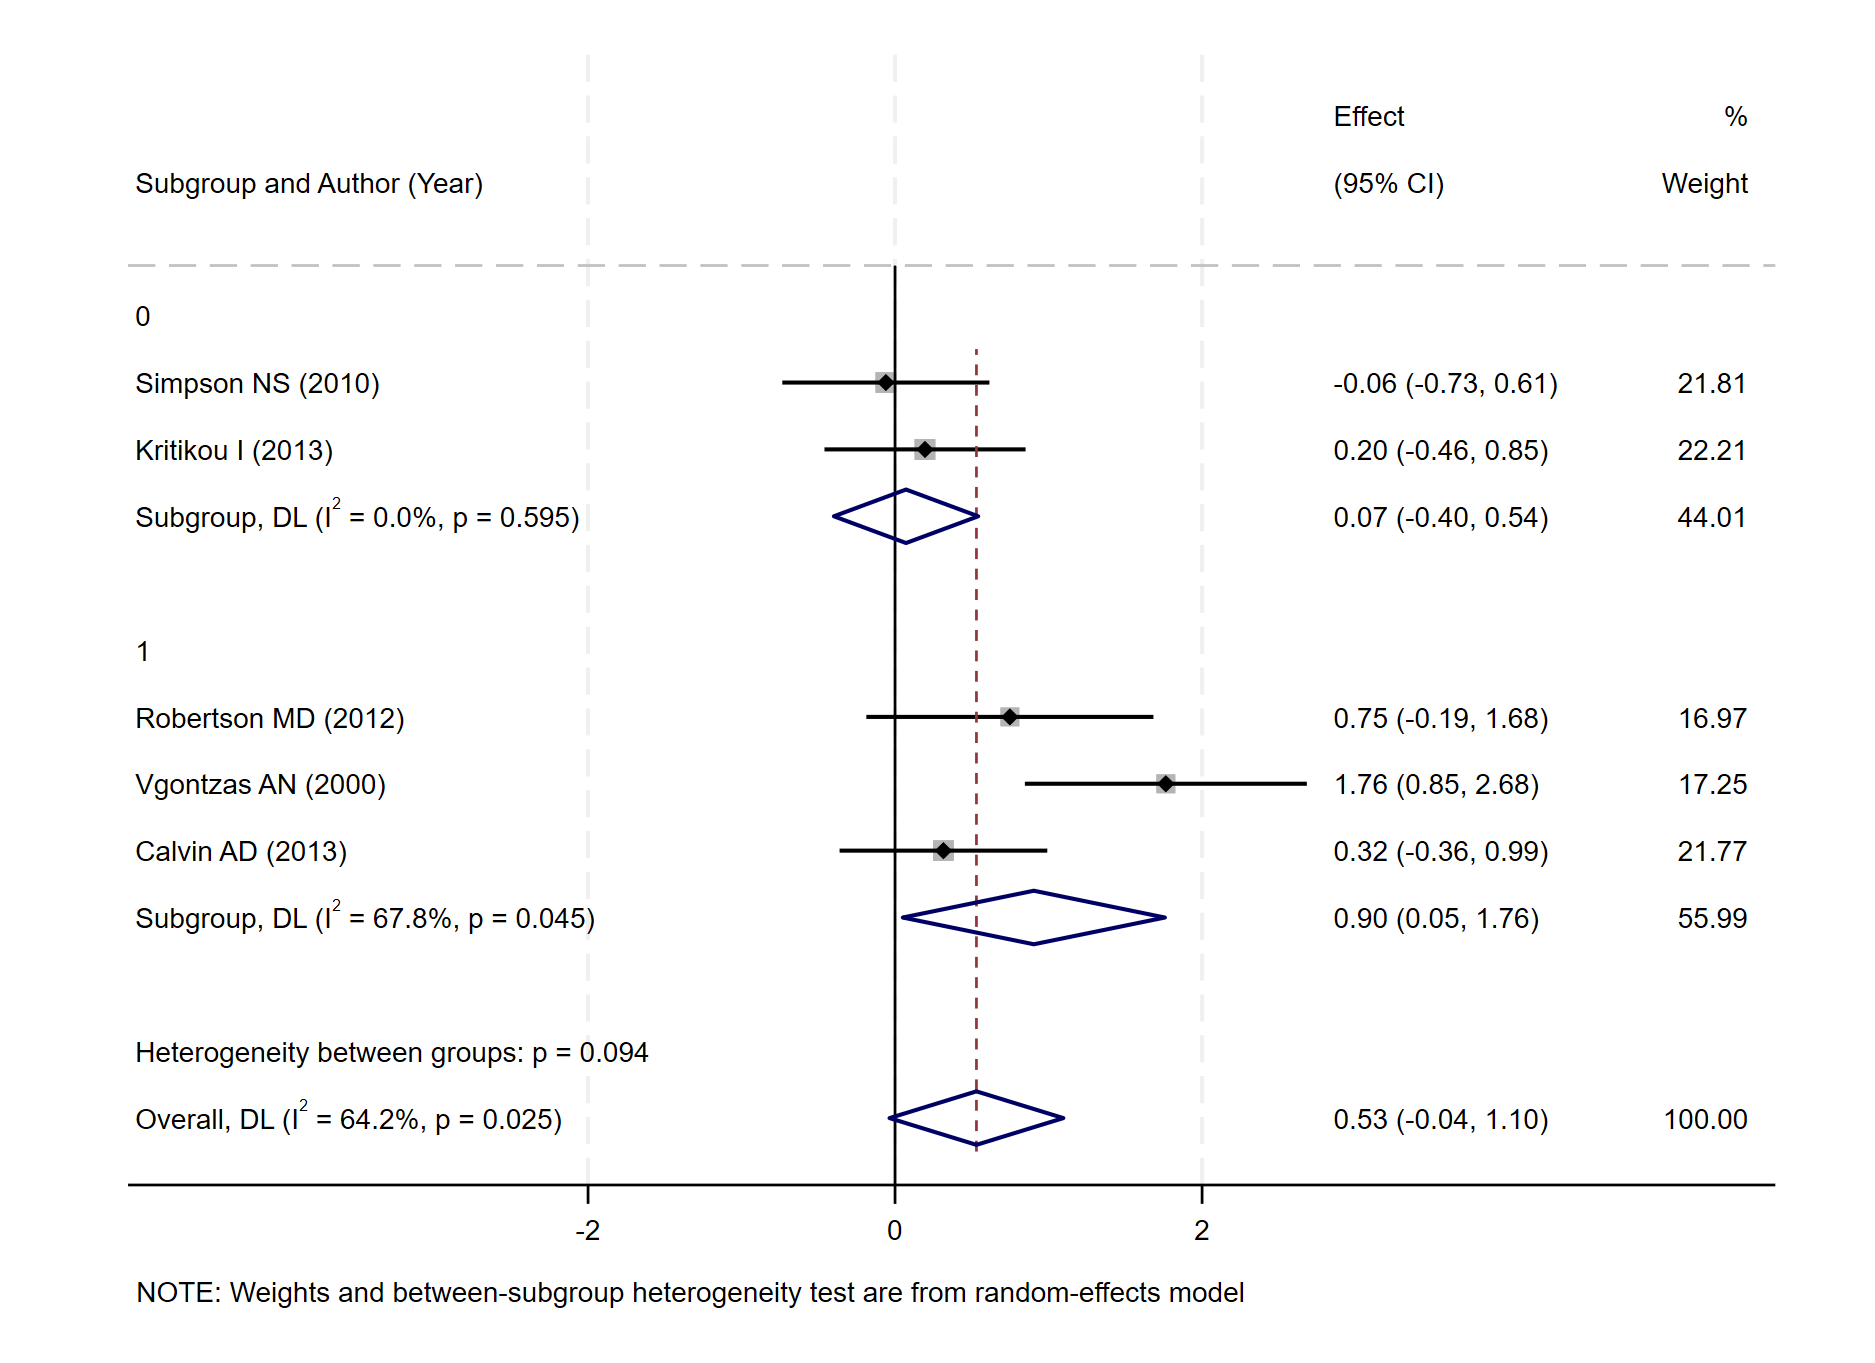


By gender ratio - N(male)/N(female) ≤ 1.5, fixed effect model


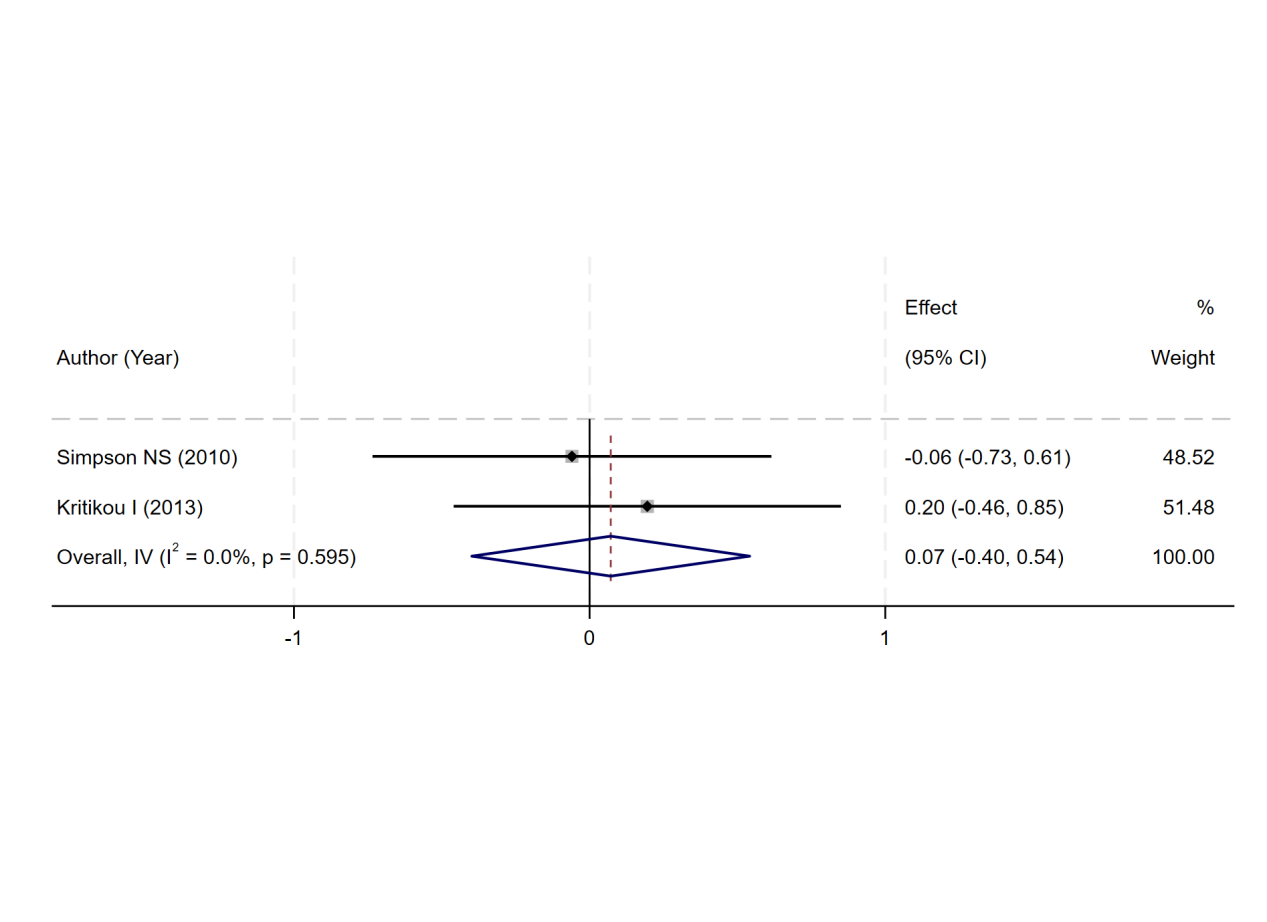


- - 1. By age range (mean value ≤ 30 = 0, mean > 30 = 1), random effects model


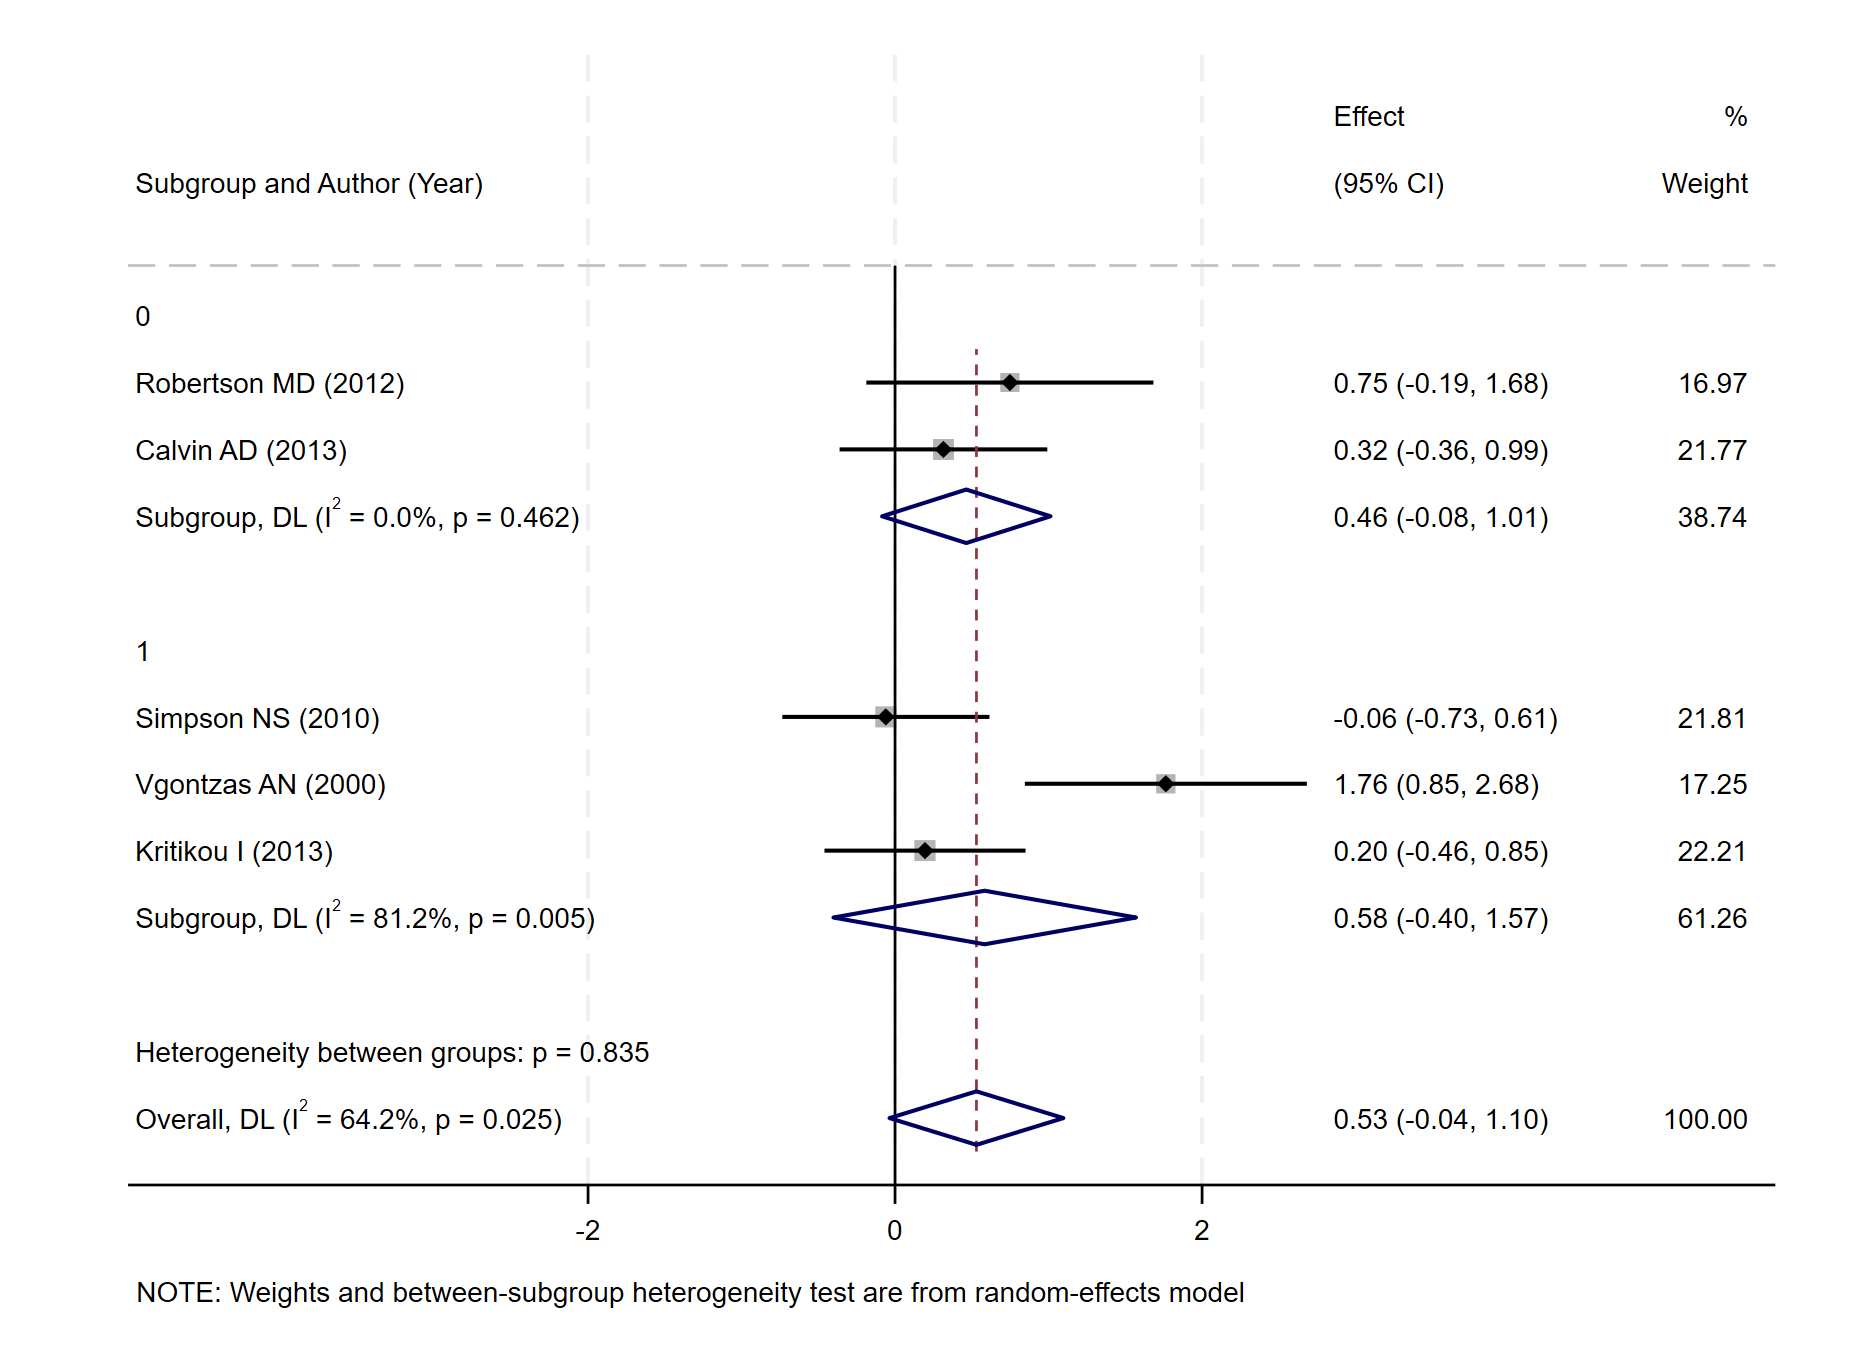


By age range - mean value ≤ 30, fixed effects model


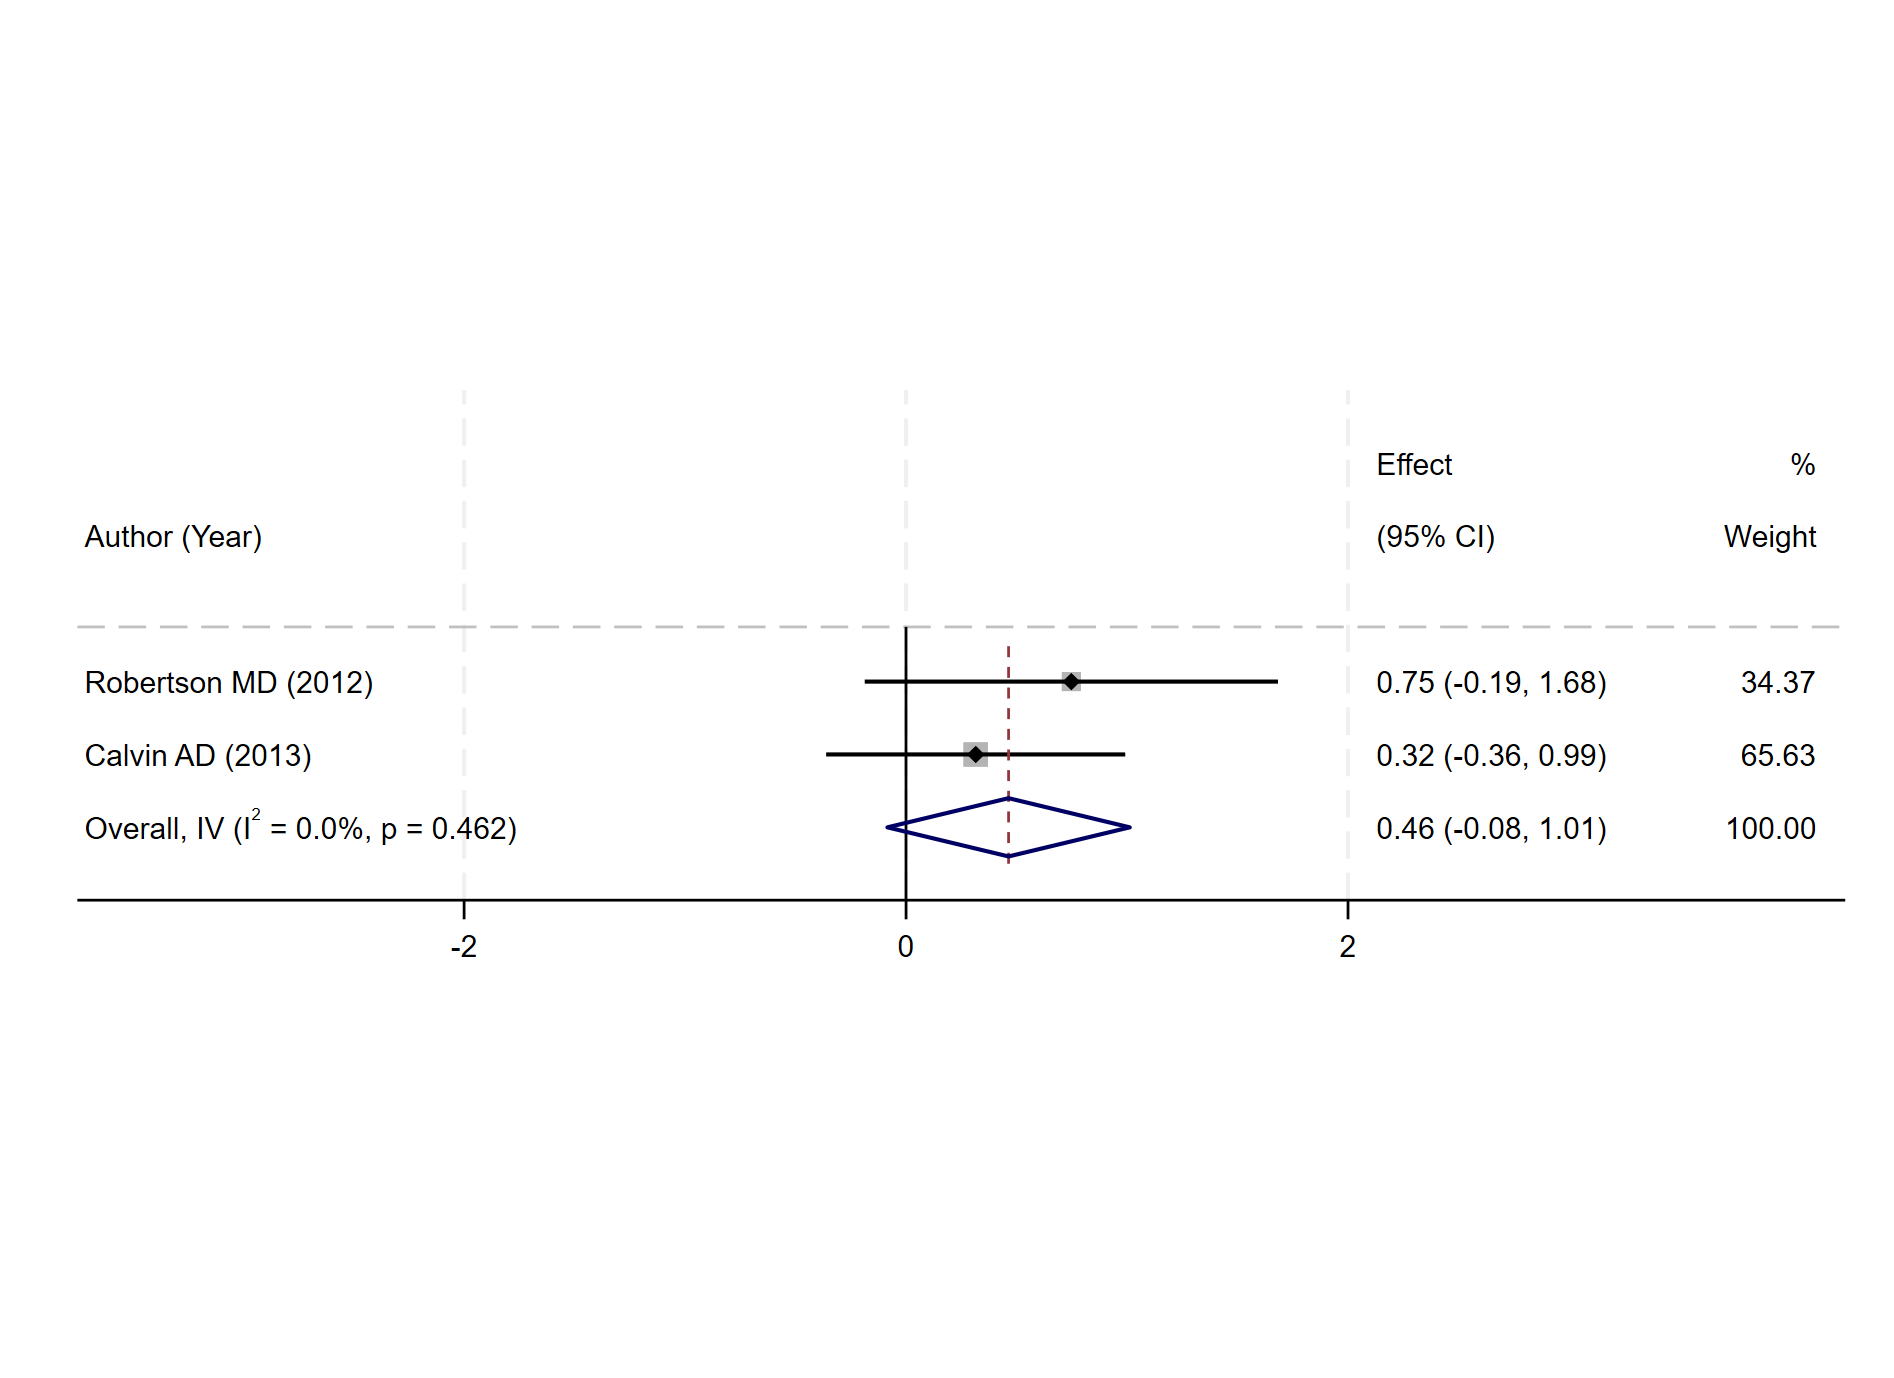


1. Crossover designed studies
   1. Weight
      1. By observation, fixed effects model


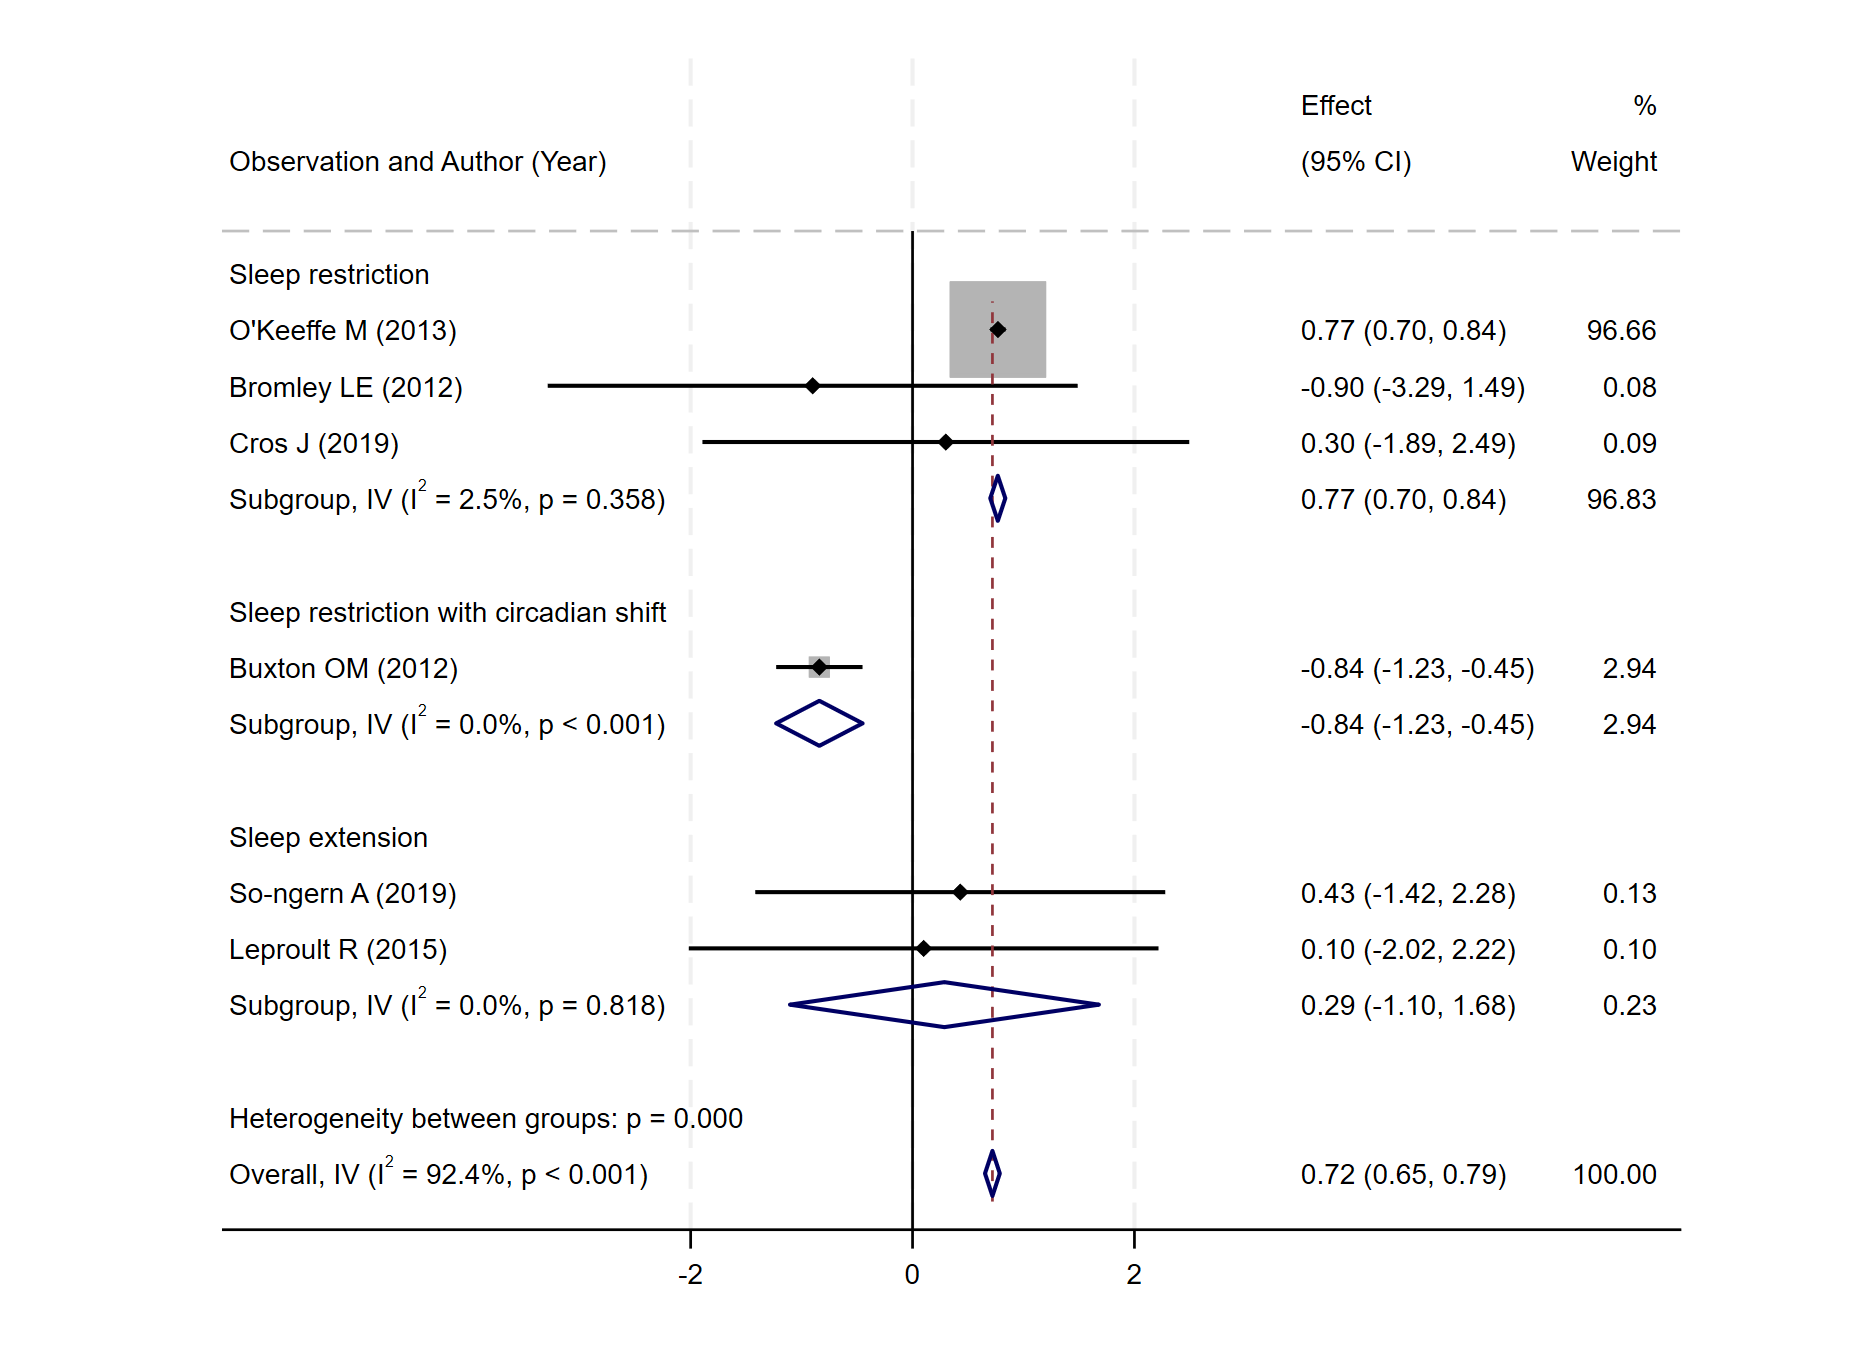


- - 1. By region, random effects model


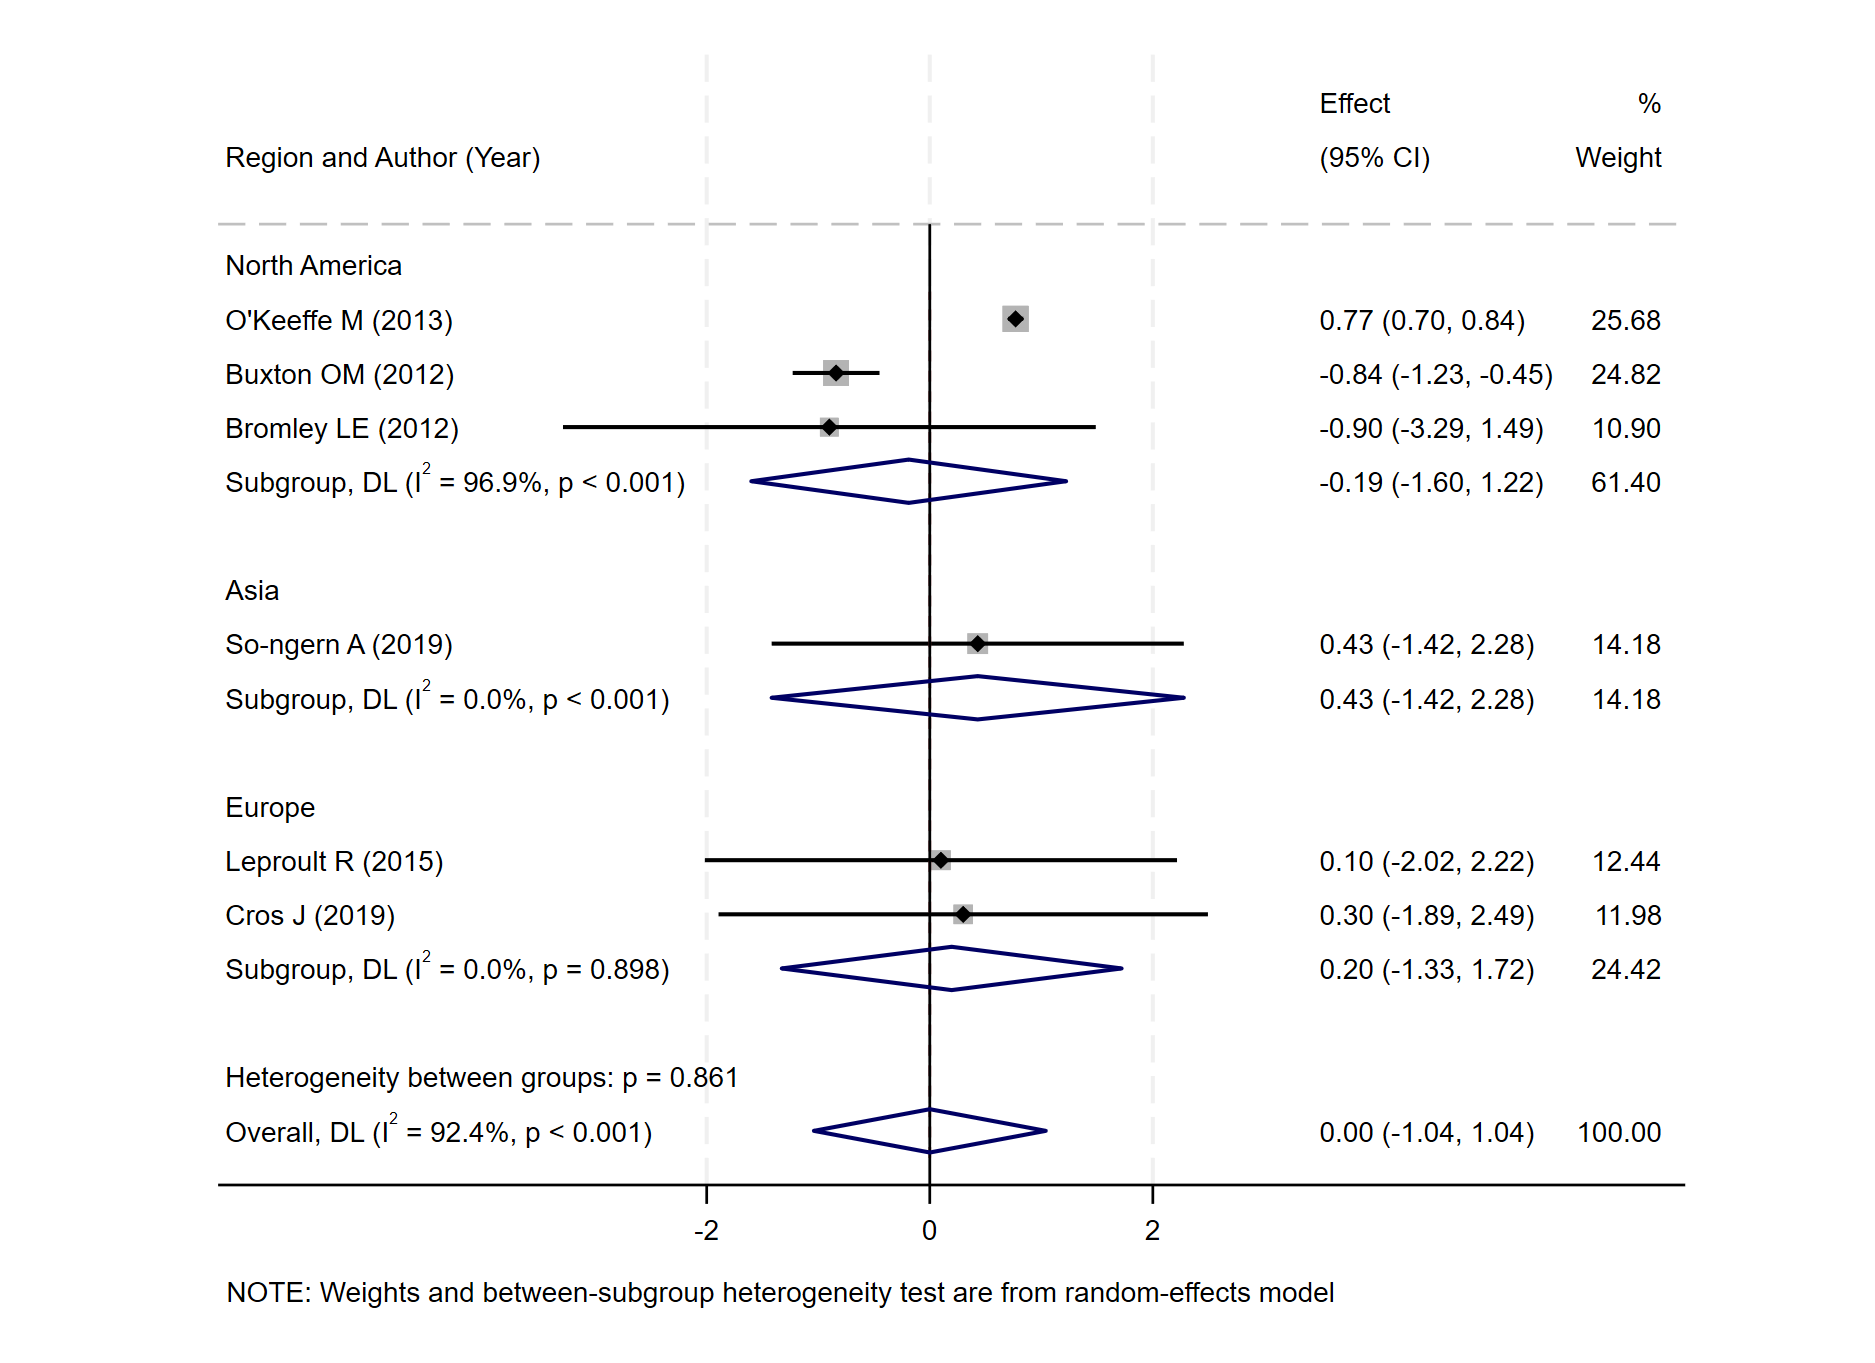


By region - Europe, fixed effect model


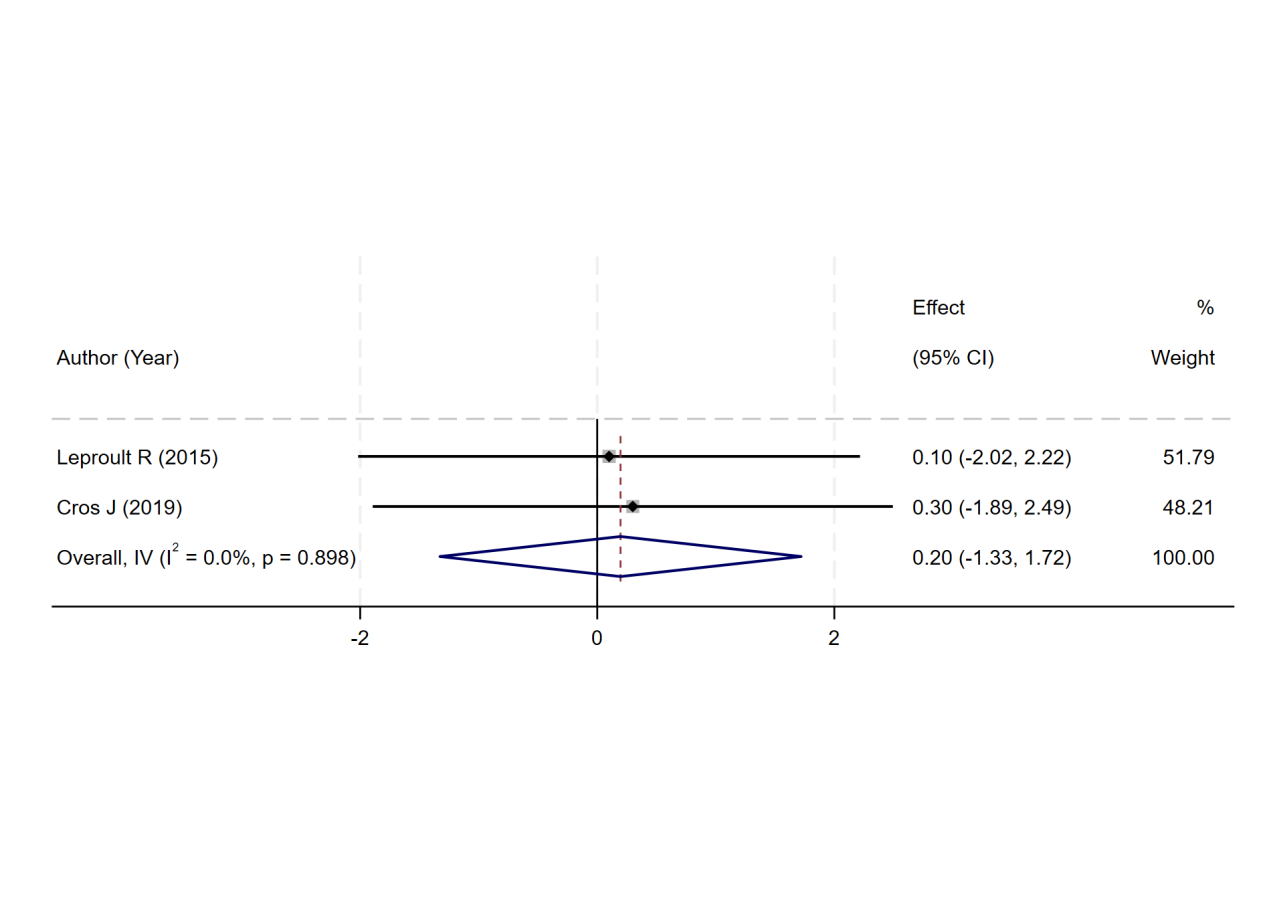


- - 1. By age range (mean value ≤ 30 = 0, mean > 30 = 1), fixed effects model


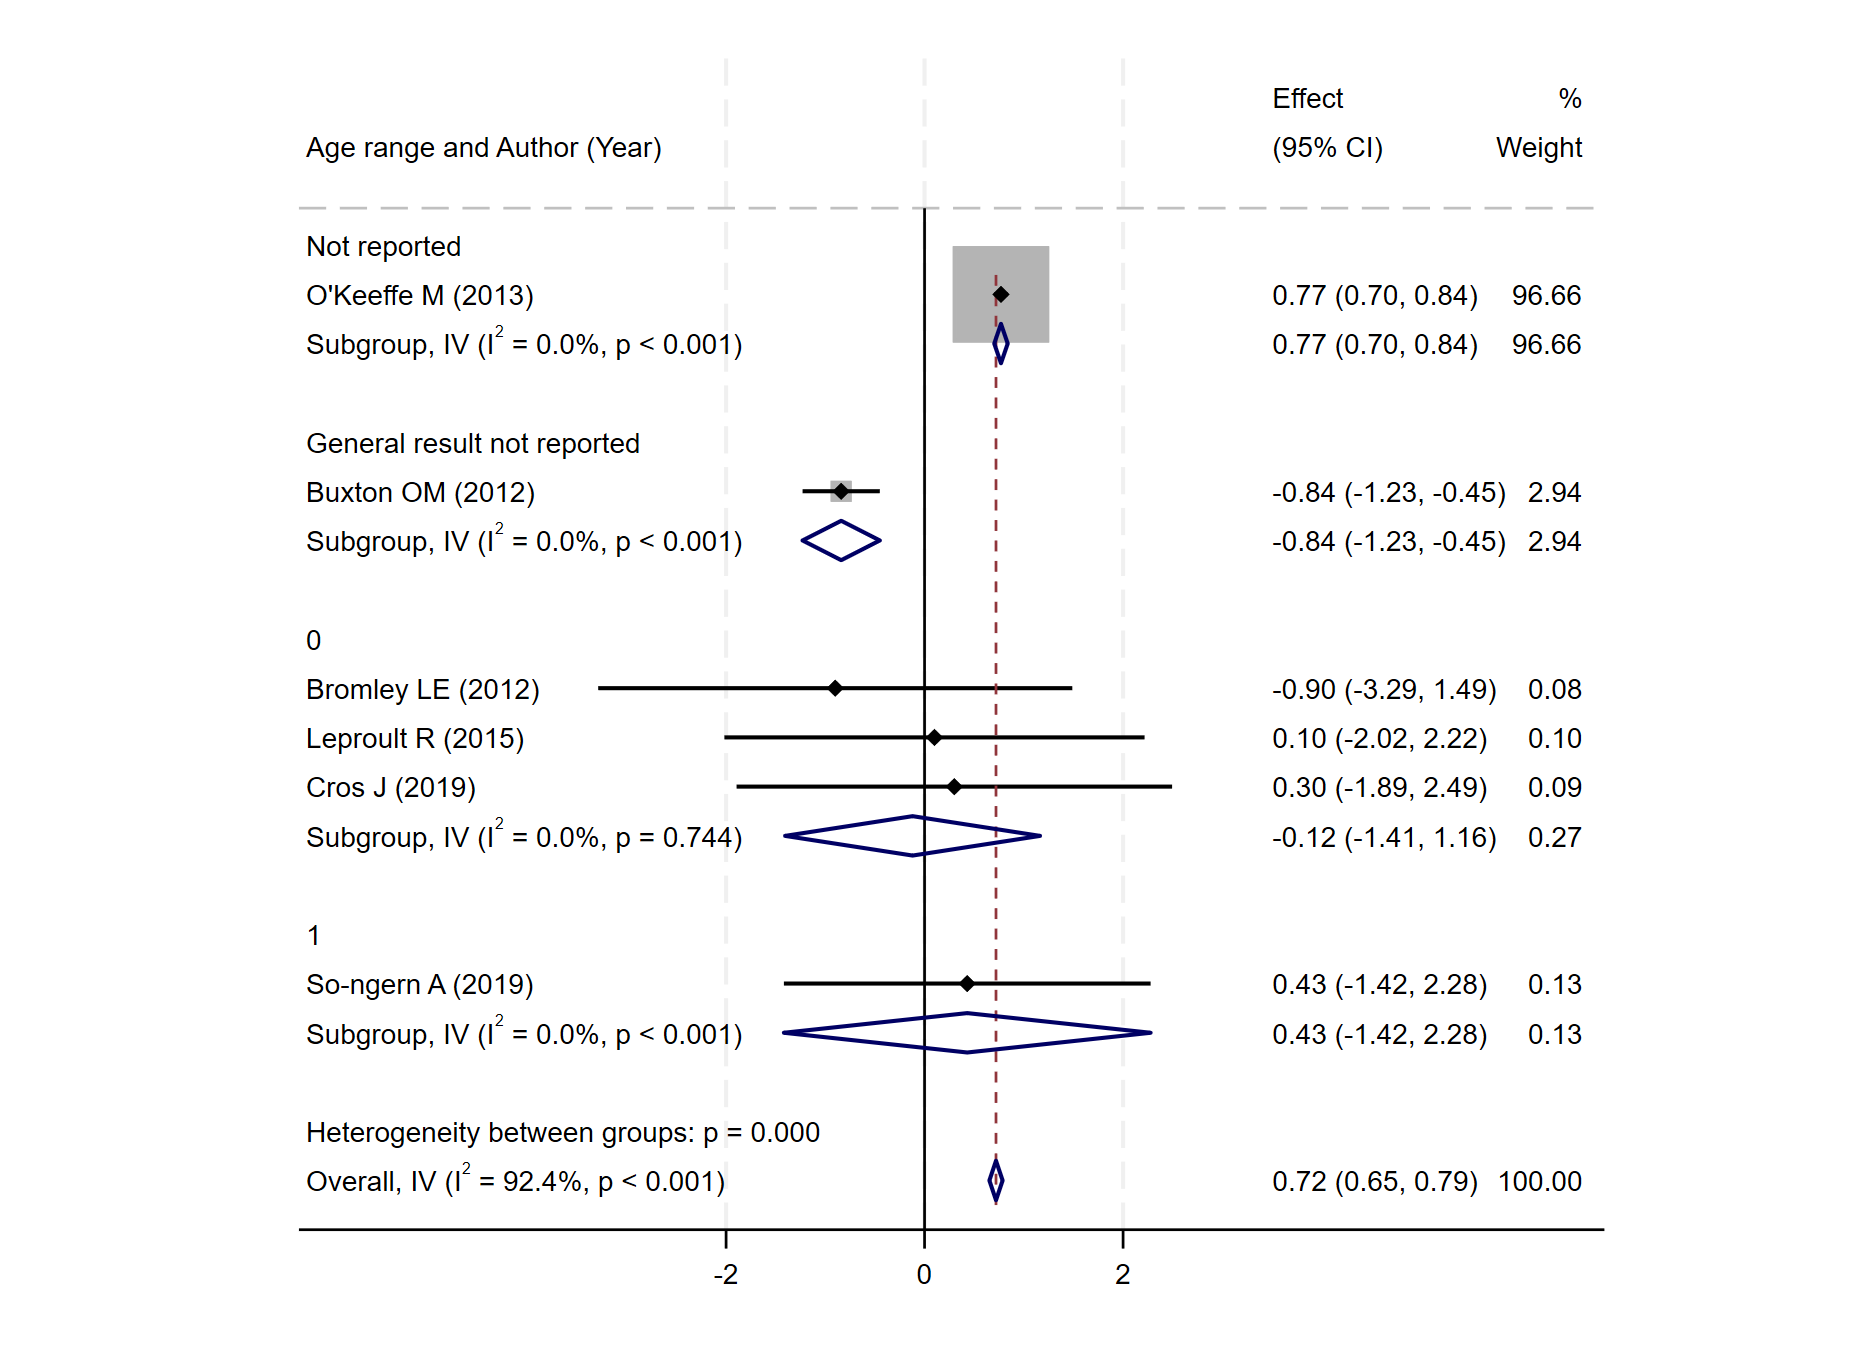


- 1. Fasting glucose
     1. By observation, random effects model


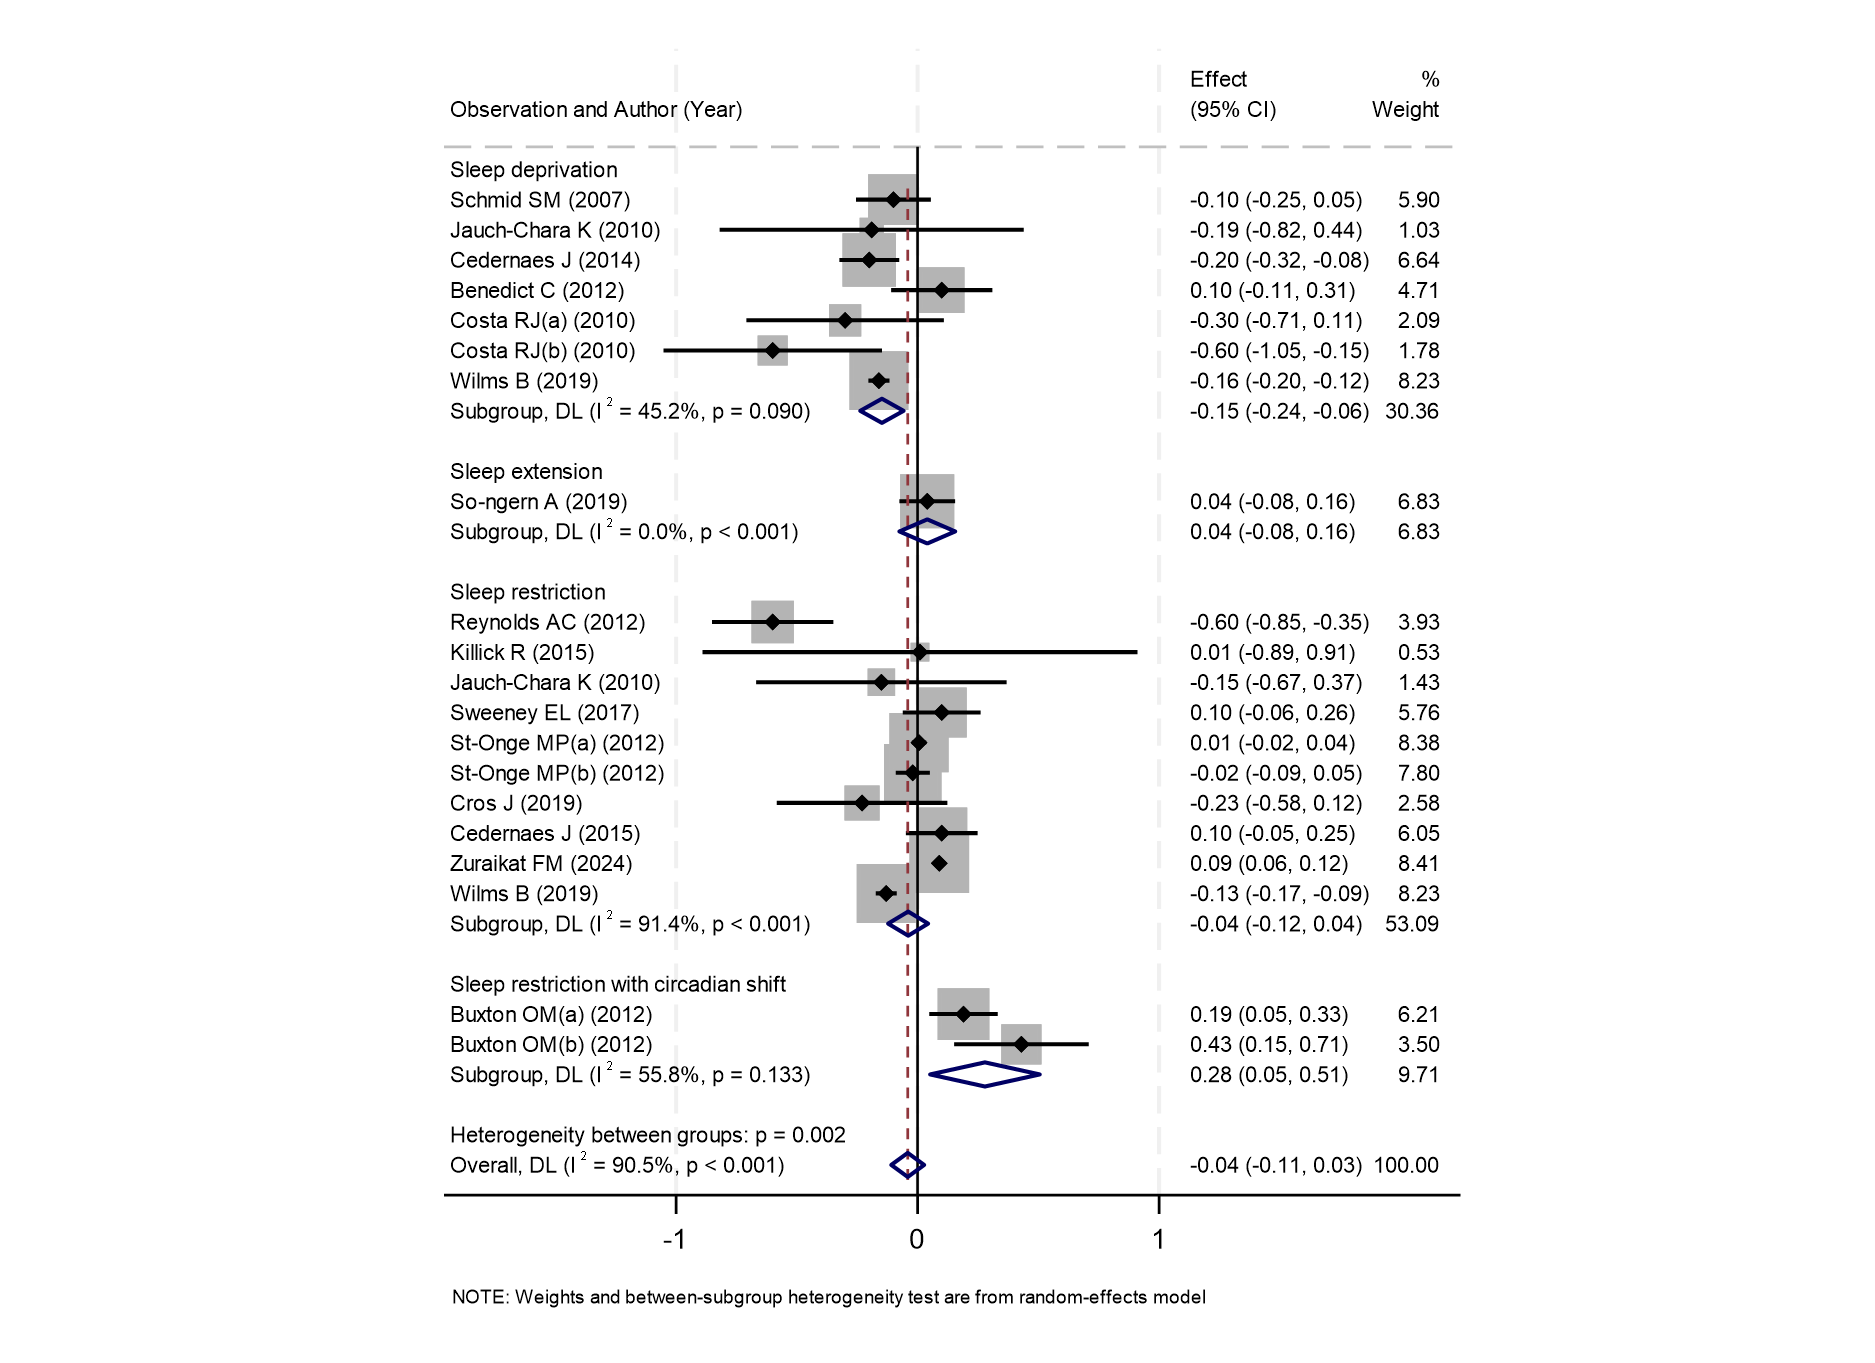


- - 1. By region, random effects model


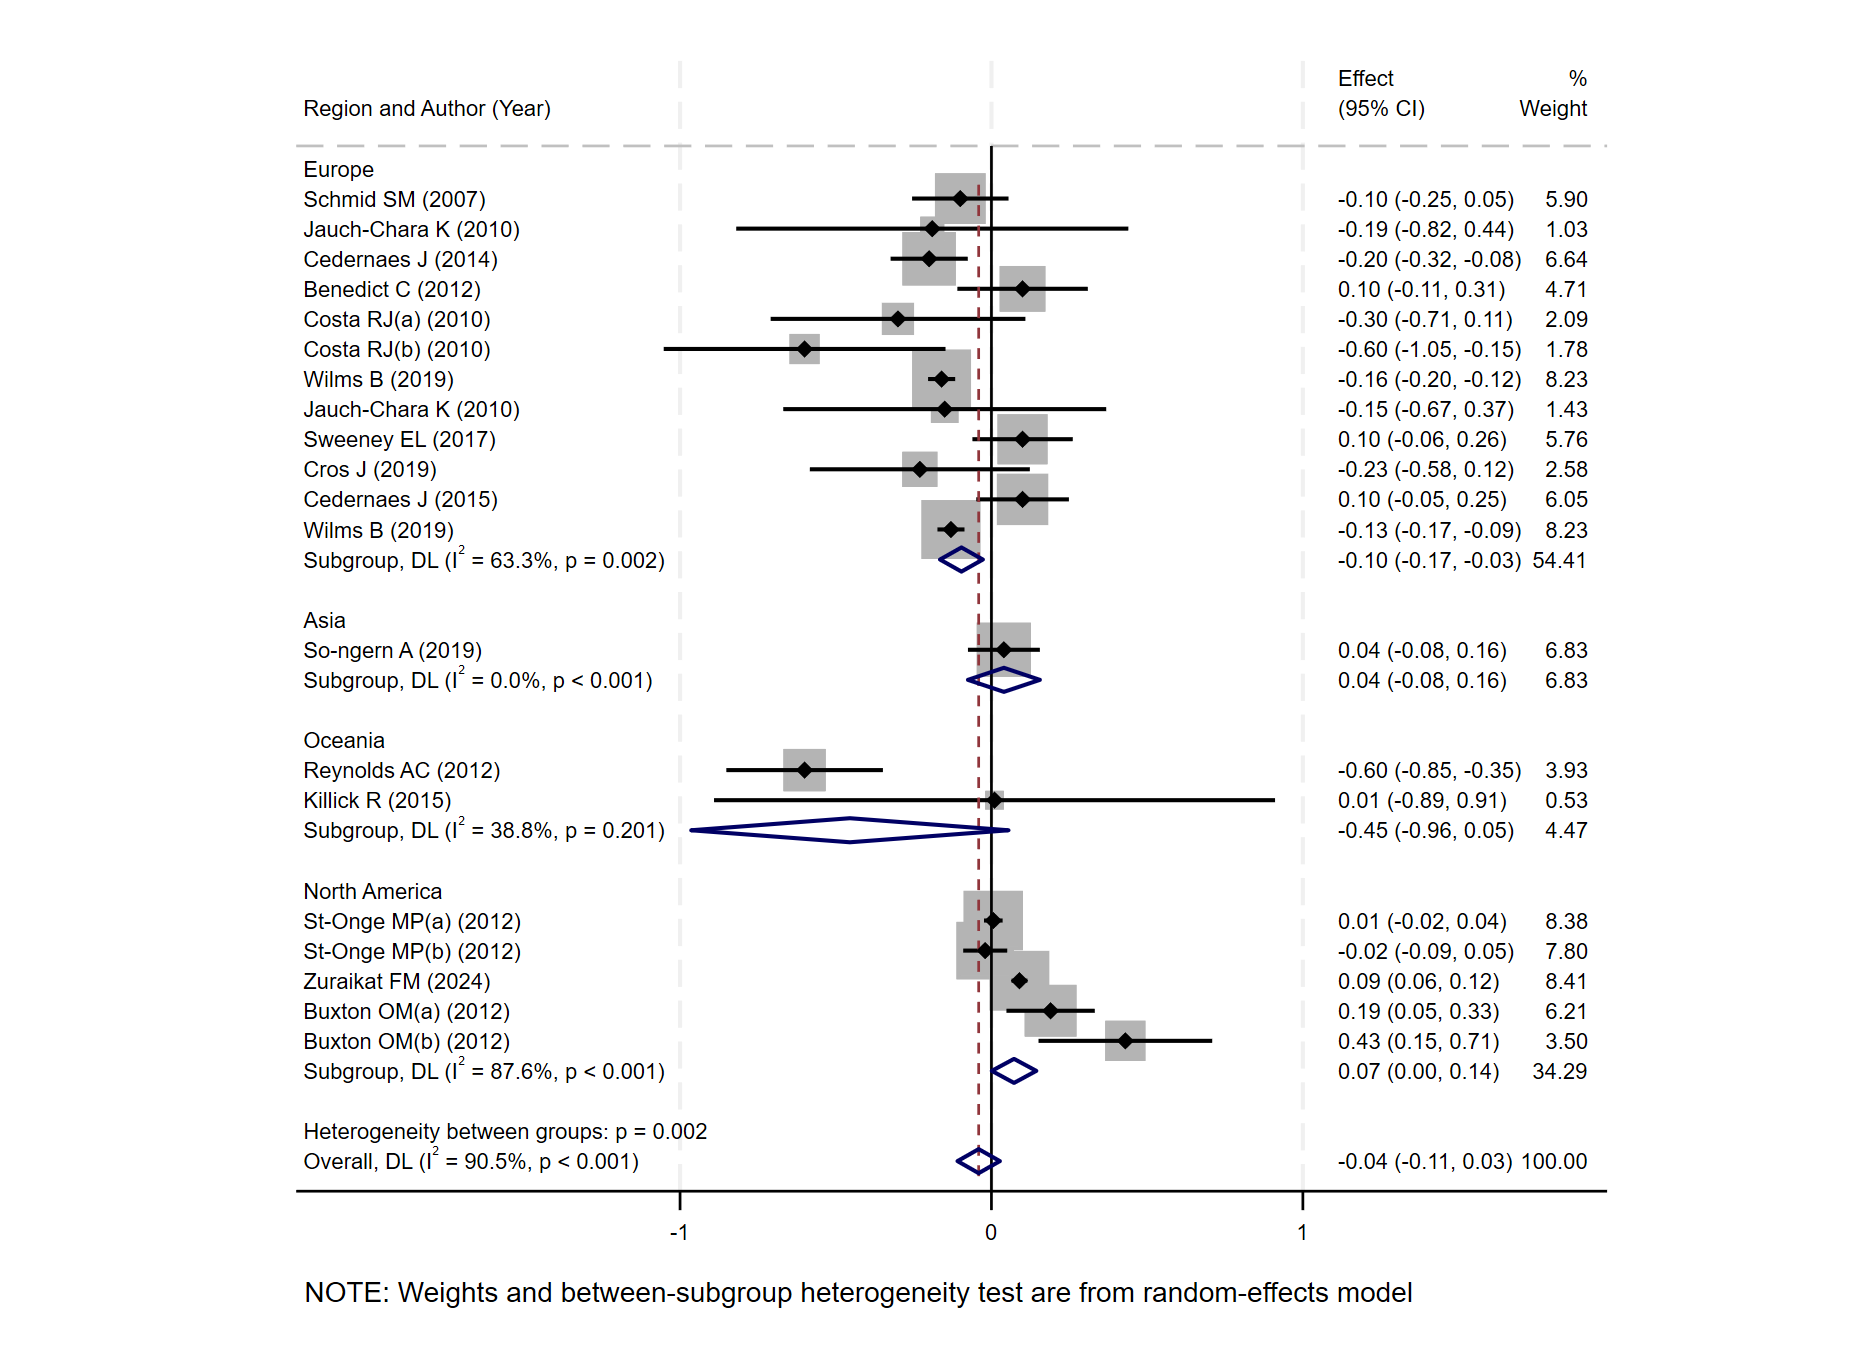


- - 1. By gender ratio (N(male)/N(female) > 1.5 = 1, ≤ 1.5 = 0), random effects model


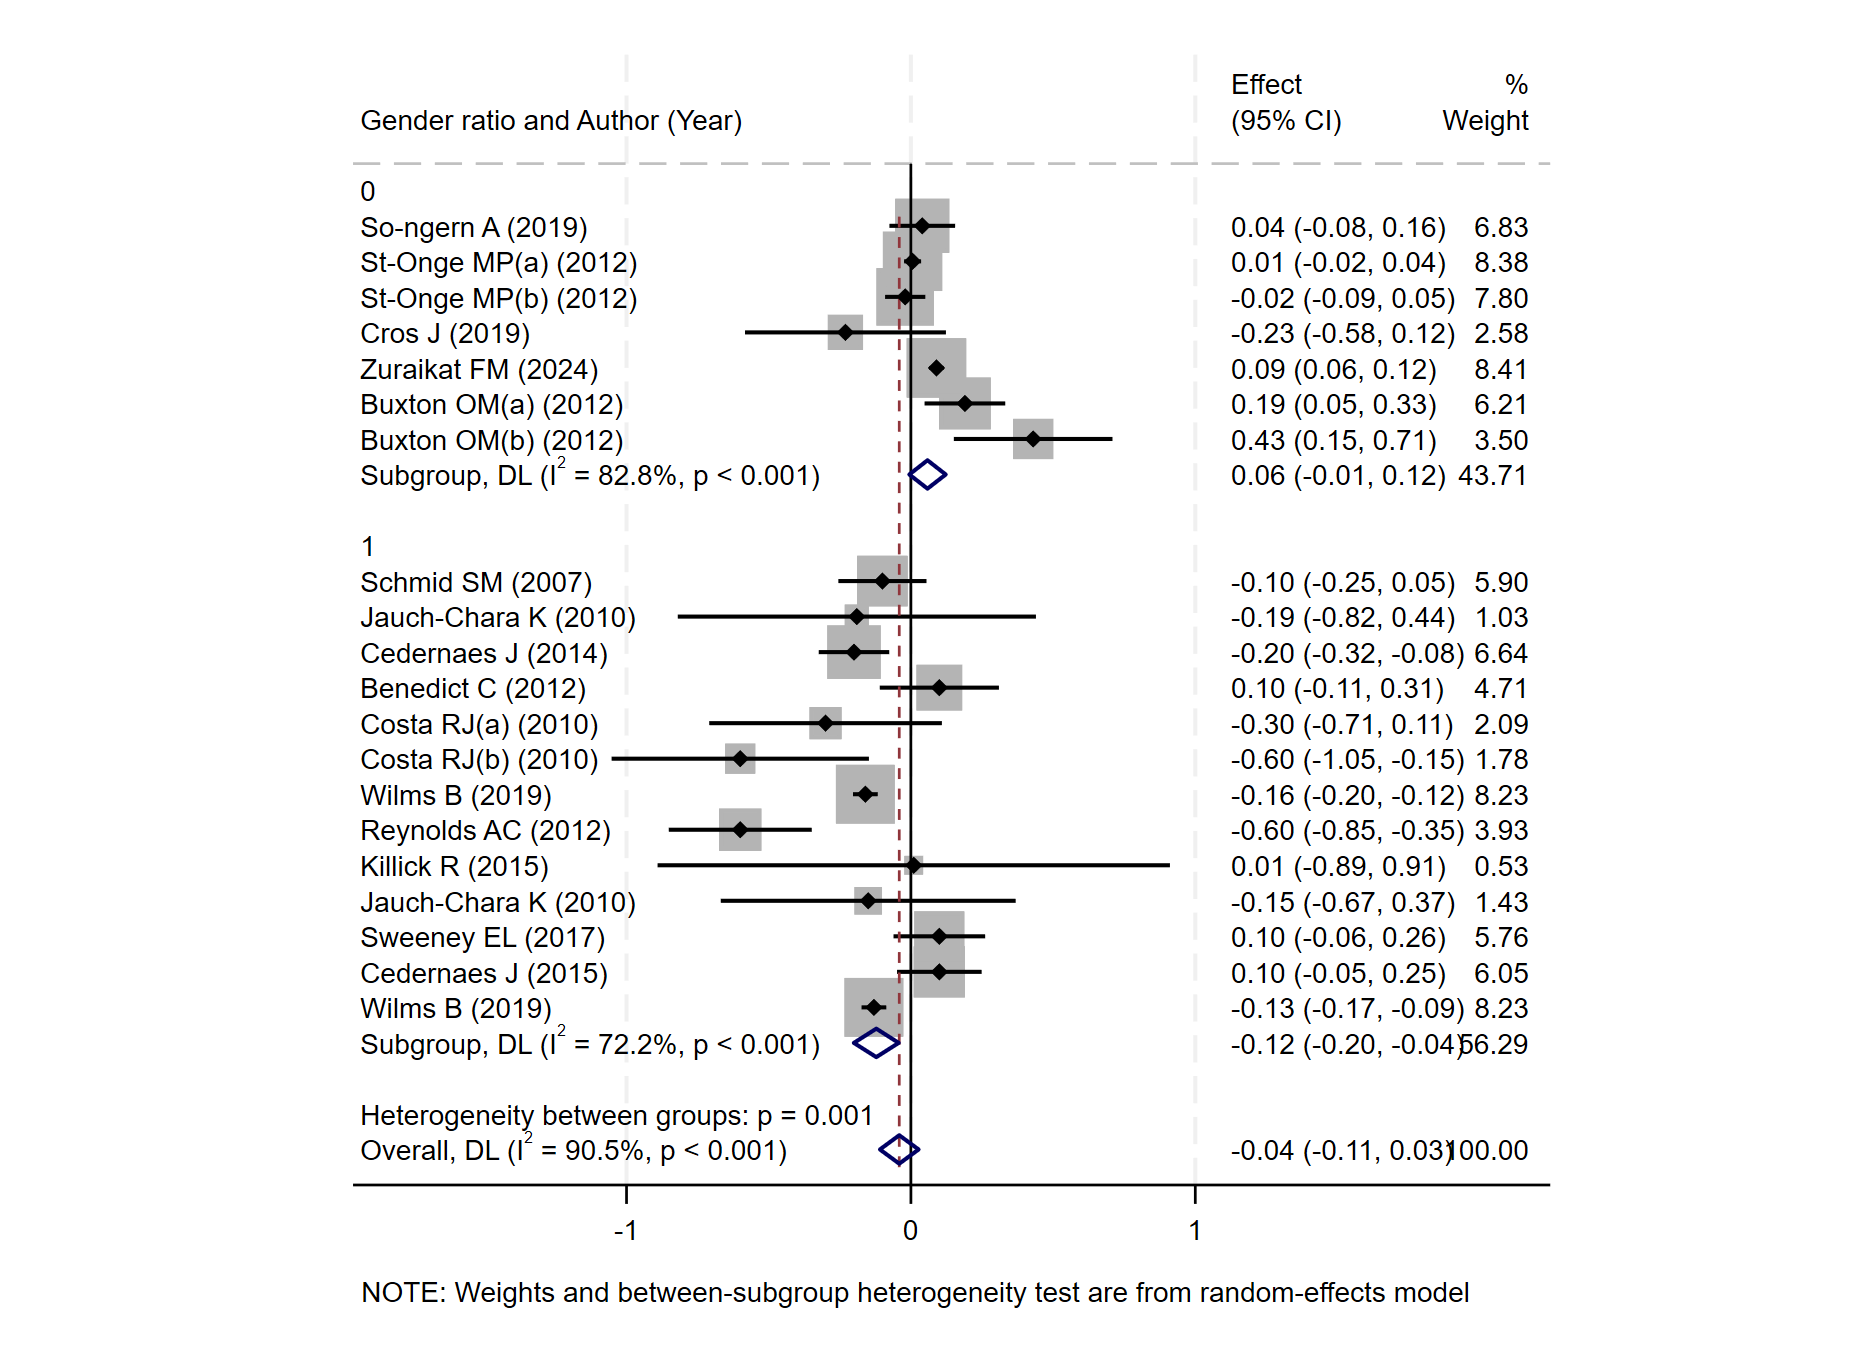


- - 1. By age range (mean value ≤ 30 = 0, mean > 30 = 1), random effects model


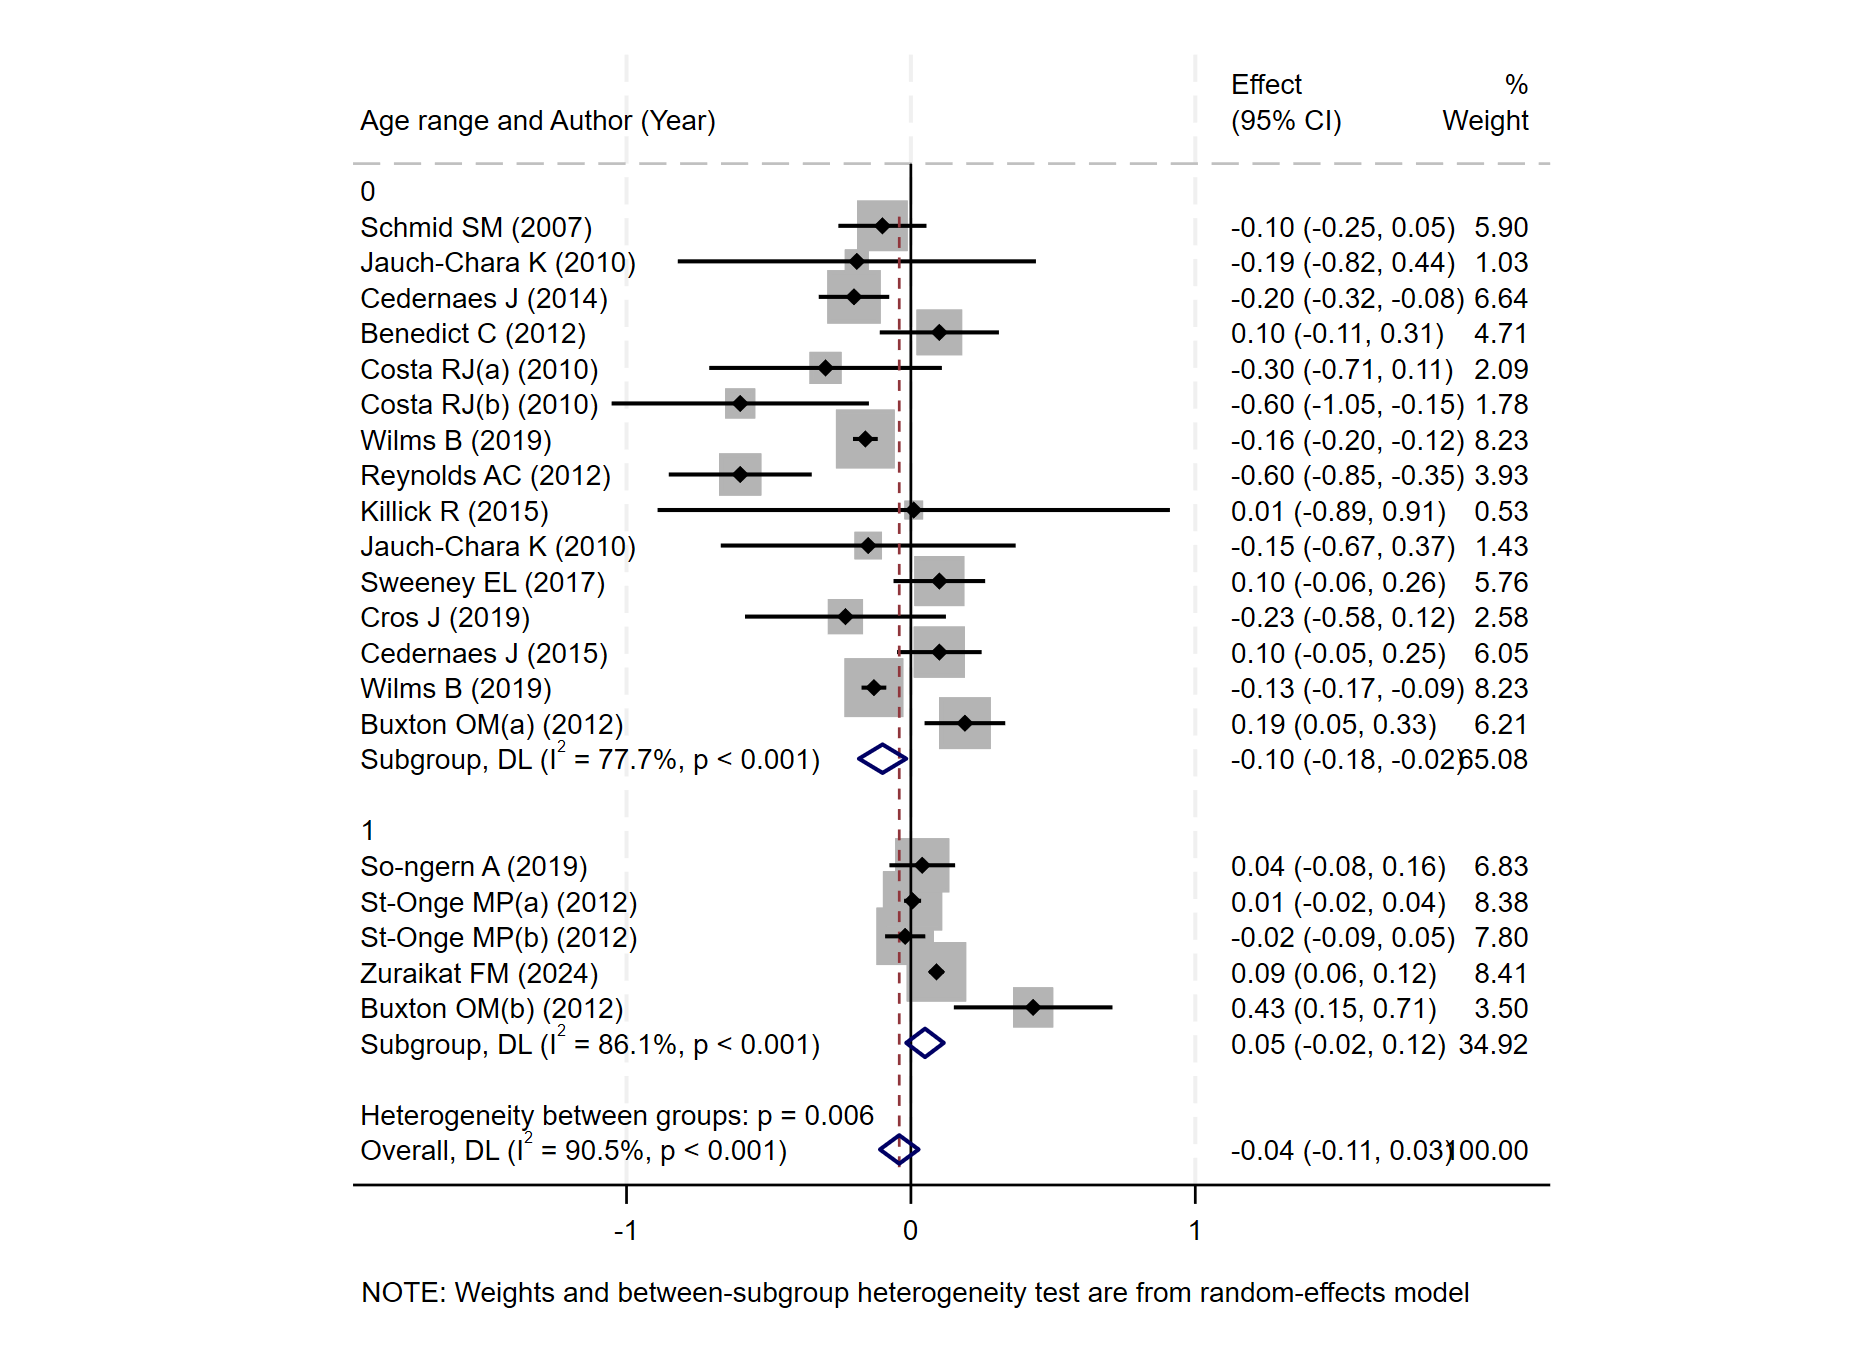


- 1. Fasting insulin
     1. By observation, random effects model


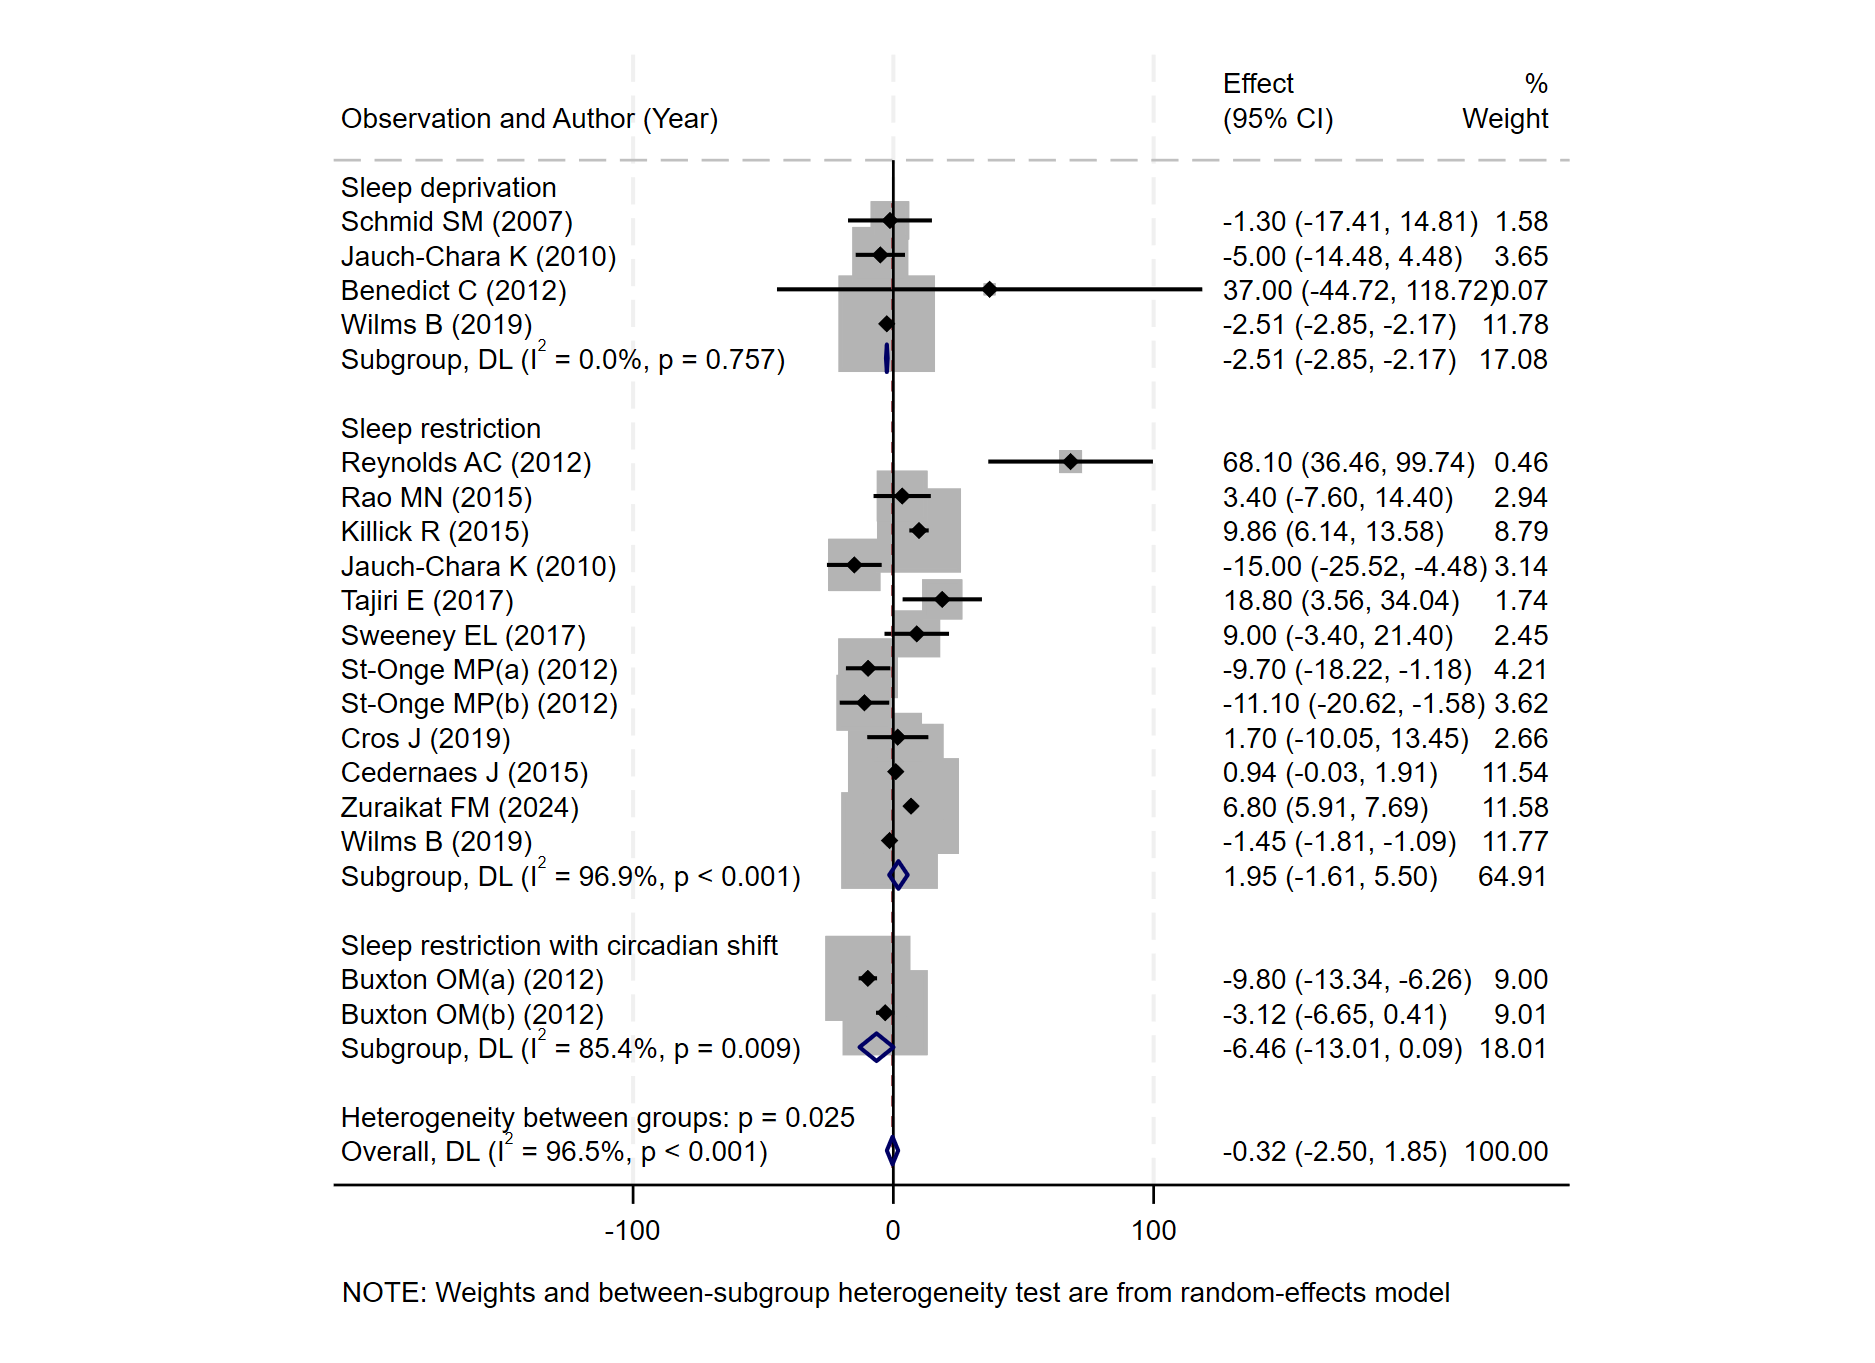


By observation - Sleep deprivation, fixed effects model


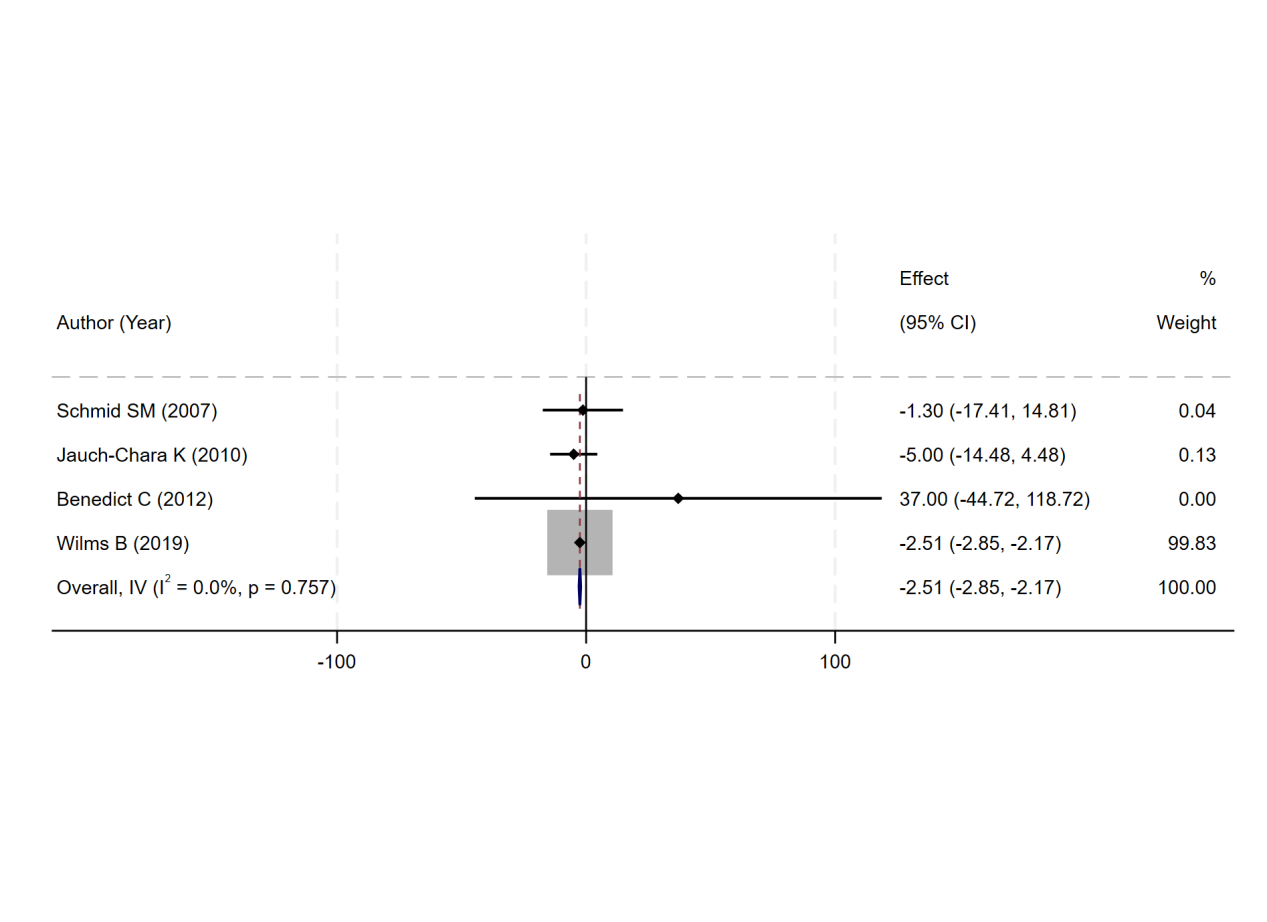


- - 1. By region, random effects model


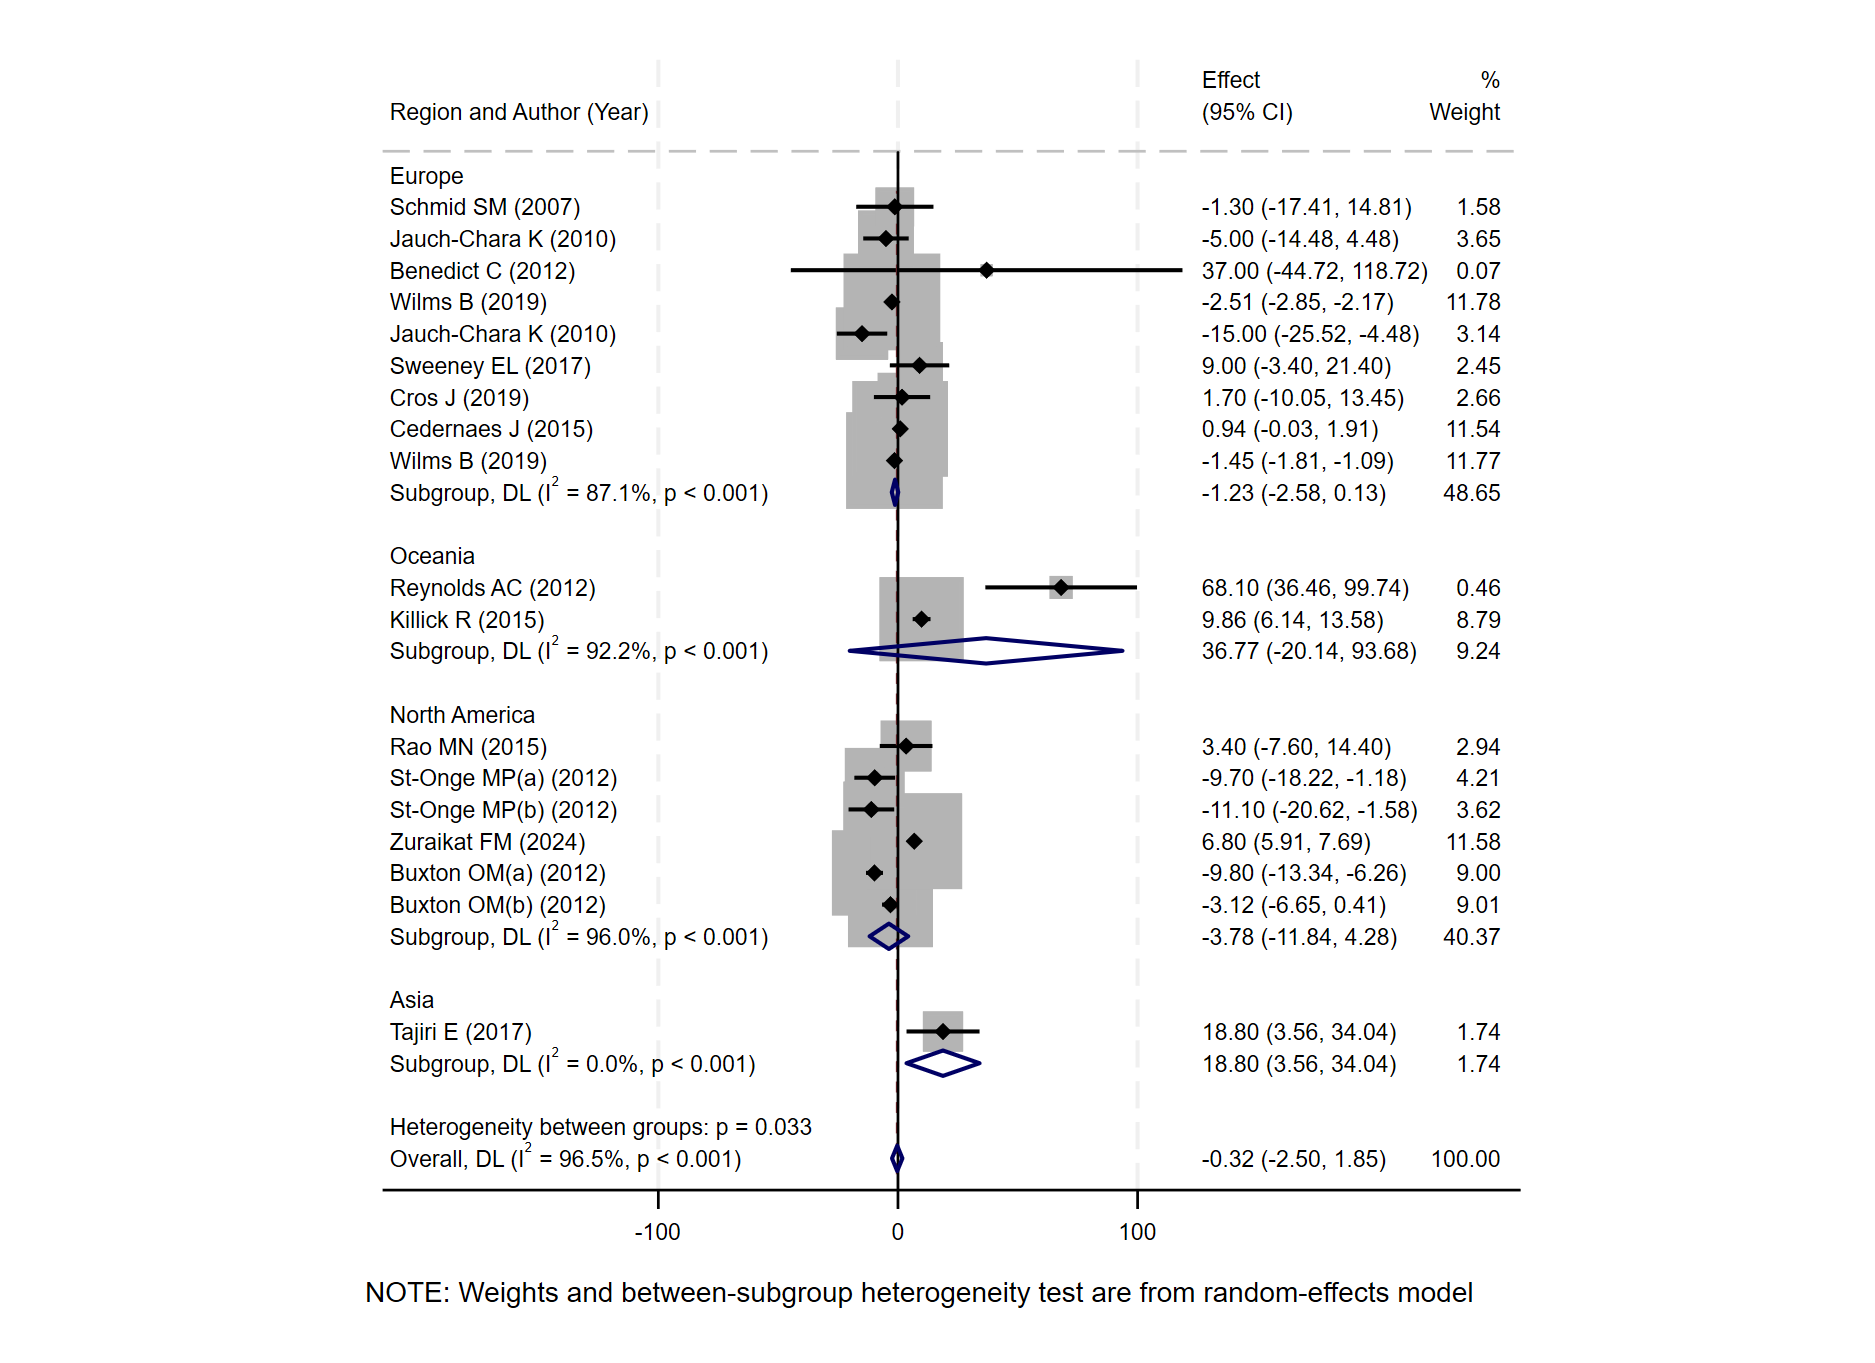


- - 1. By gender ratio (N(male)/N(female) > 1.5 = 1, ≤ 1.5 = 0), random effects model


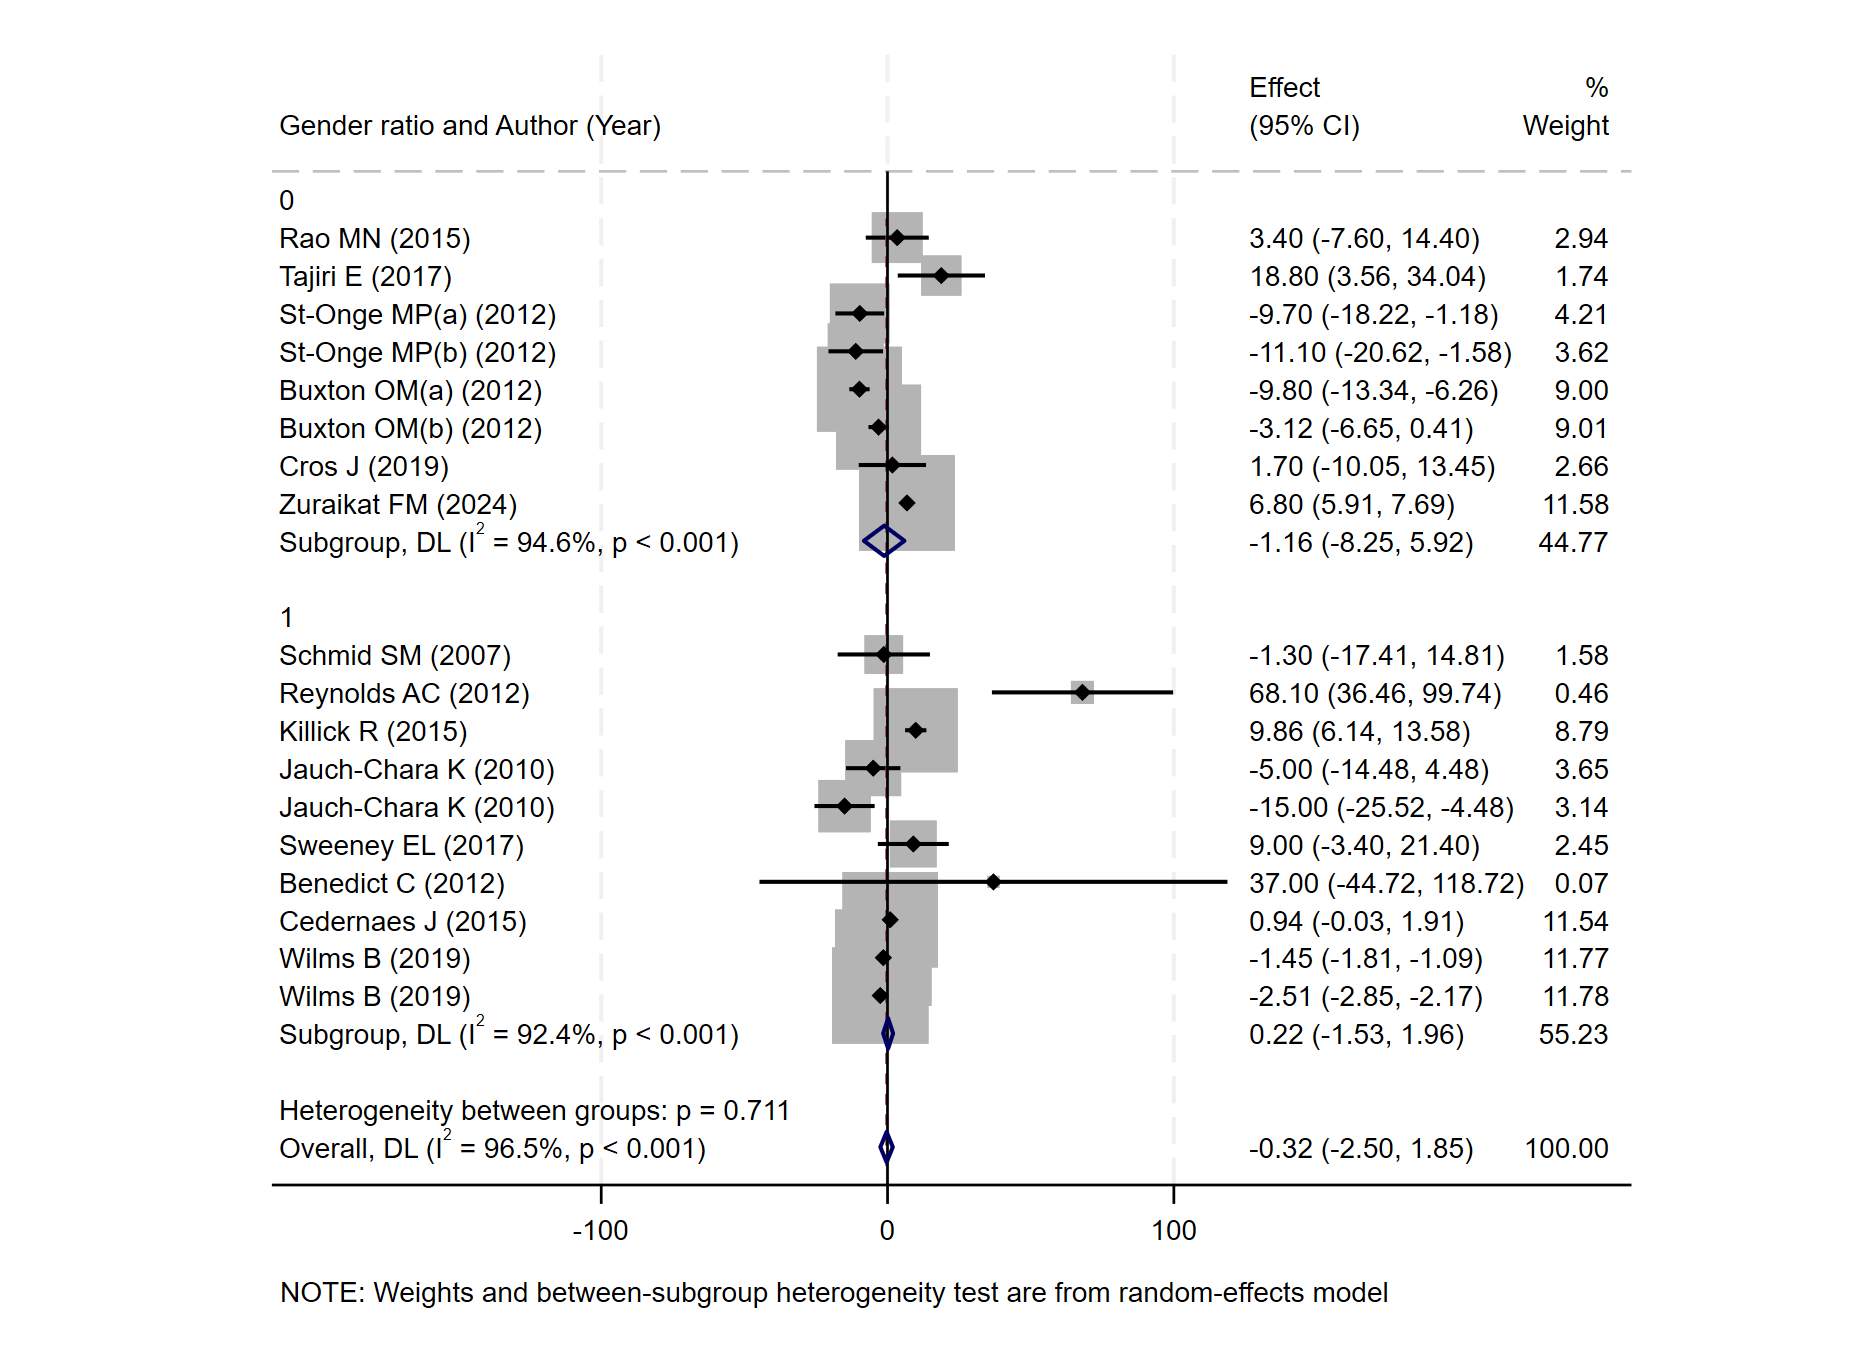


- - 1. By age range (mean value ≤ 30 = 0, mean > 30 = 1), random effects model


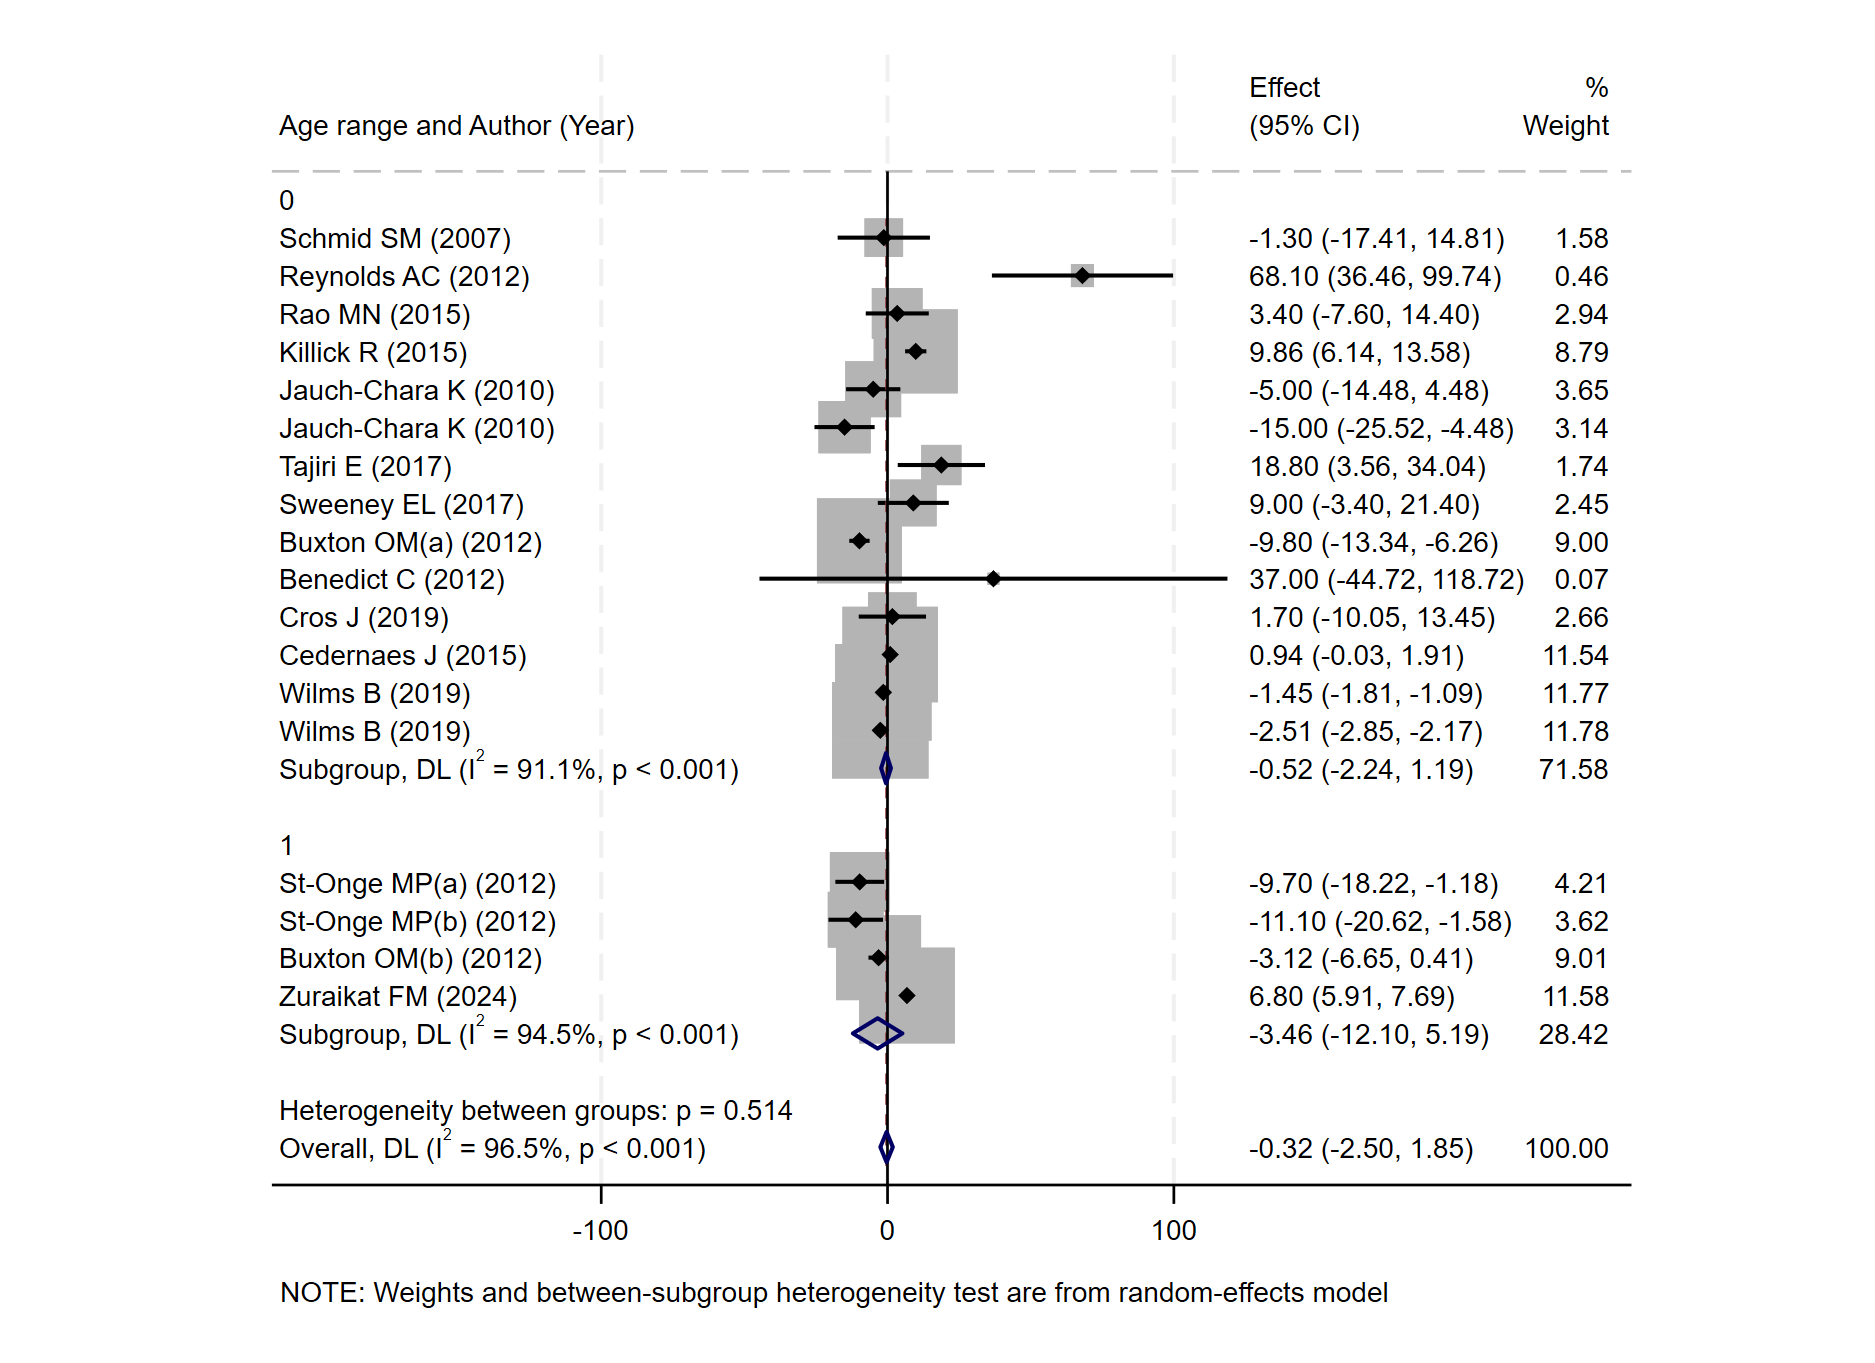


- 1. Total triglycerides
     1. By region, fixed effects model


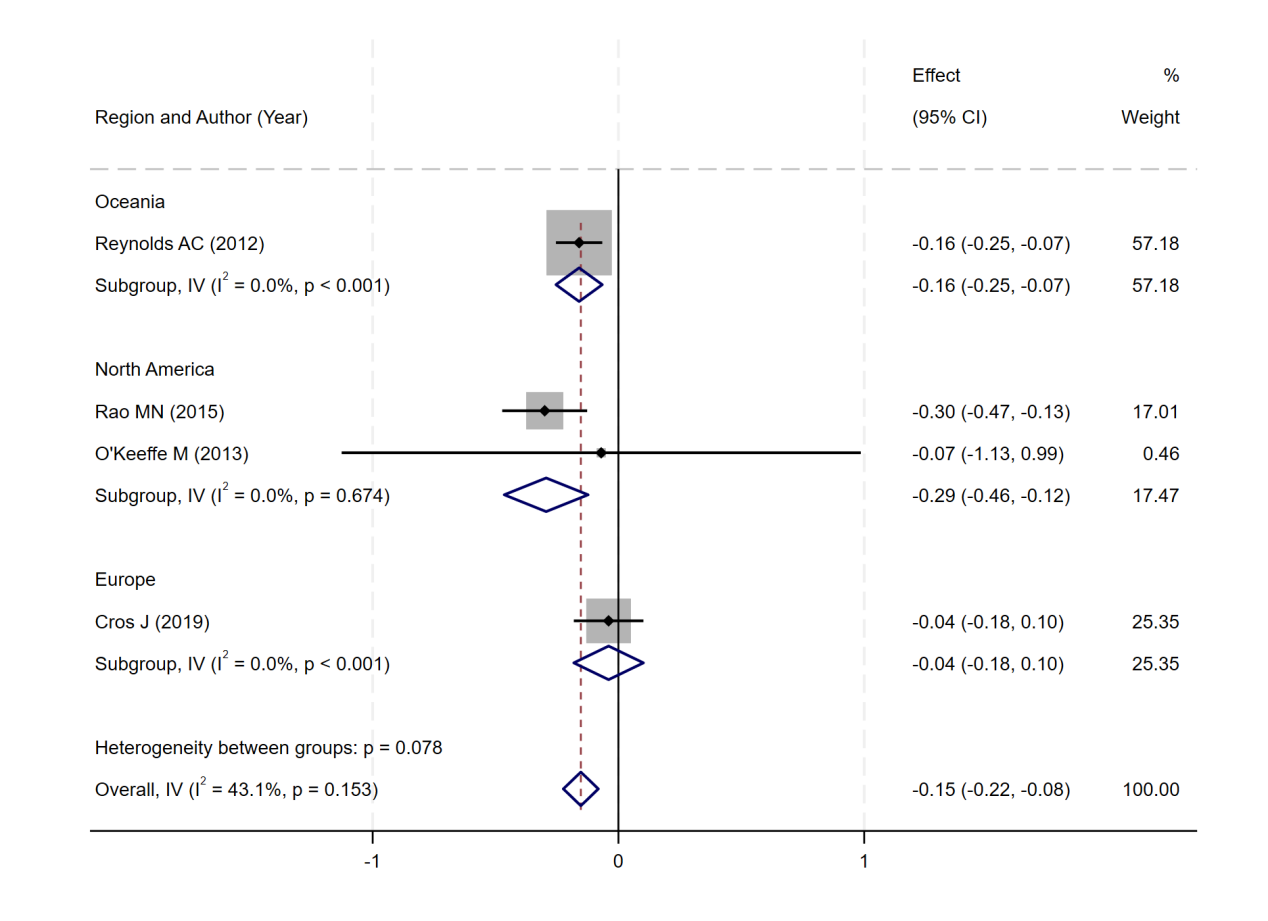


- - 1. By gender ratio (N(male)/N(female) > 1.5 = 1, ≤ 1.5 = 0), random effects model


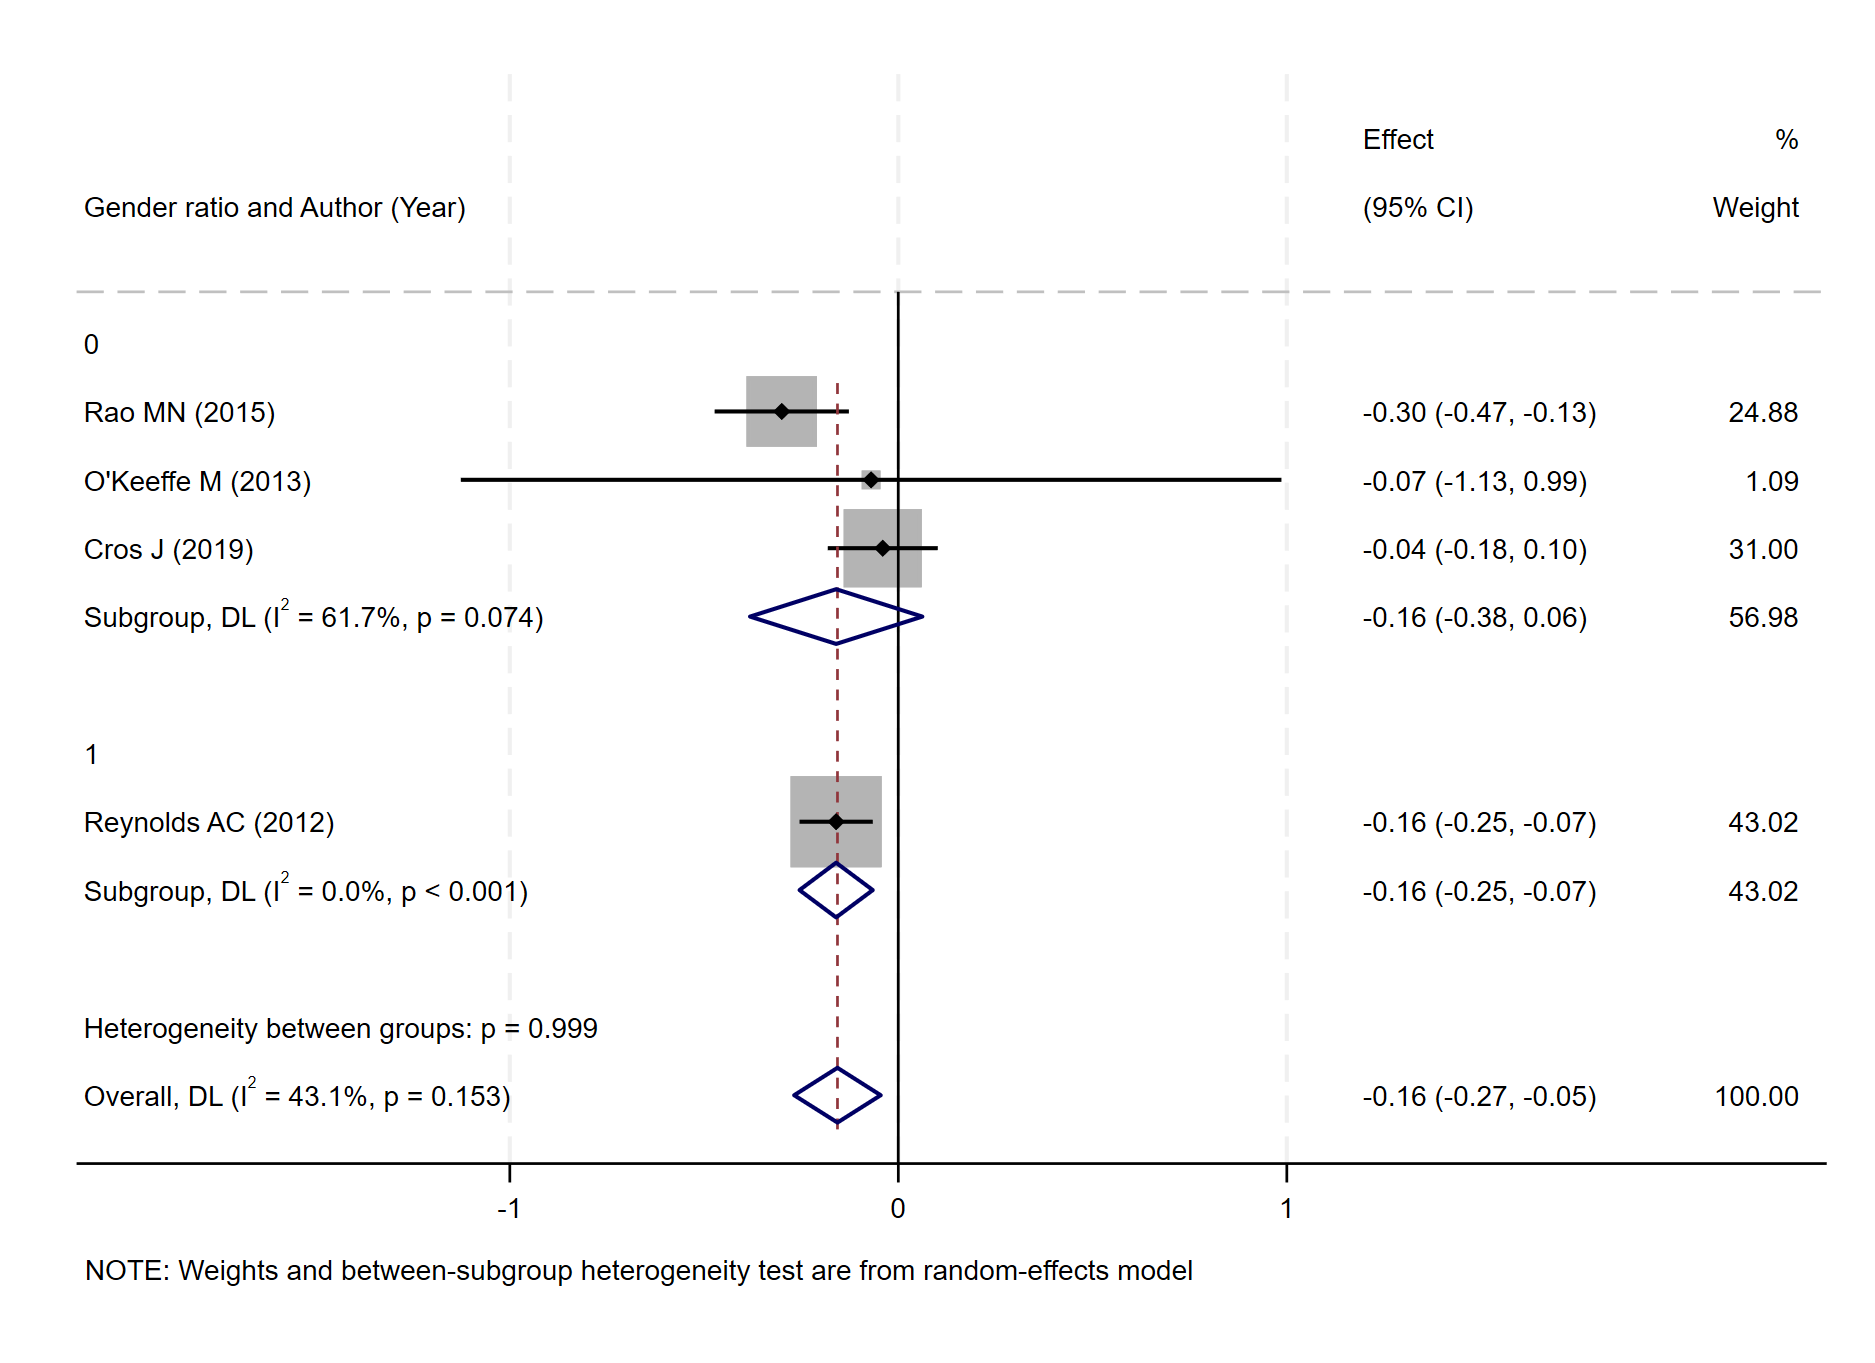


- - 1. By age range (mean value ≤ 30 = 0, mean > 30 = 1), random effects model


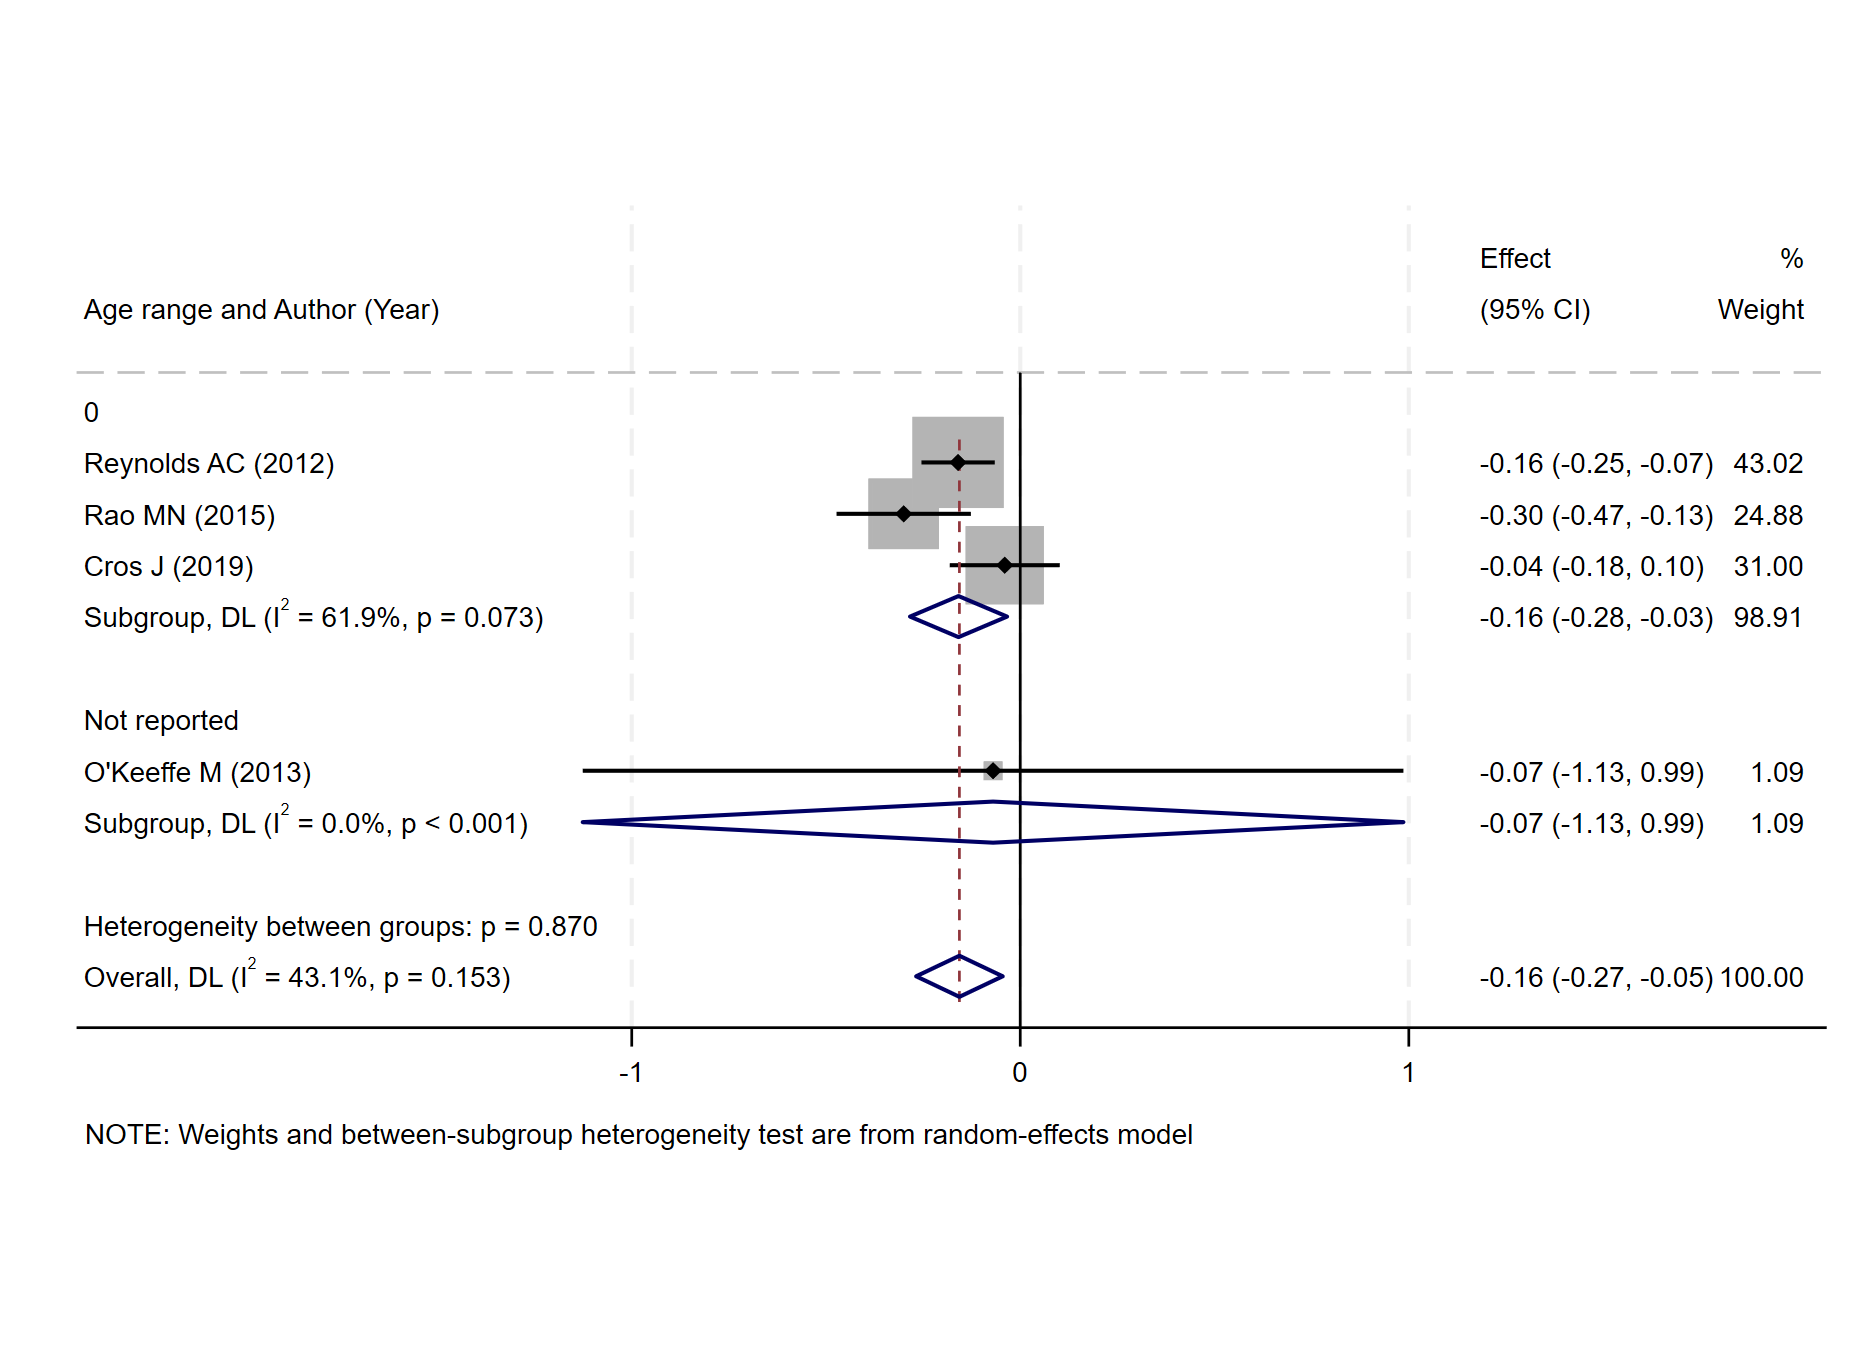


- 1. Fasting ghrelin
     1. By observation, random effects model


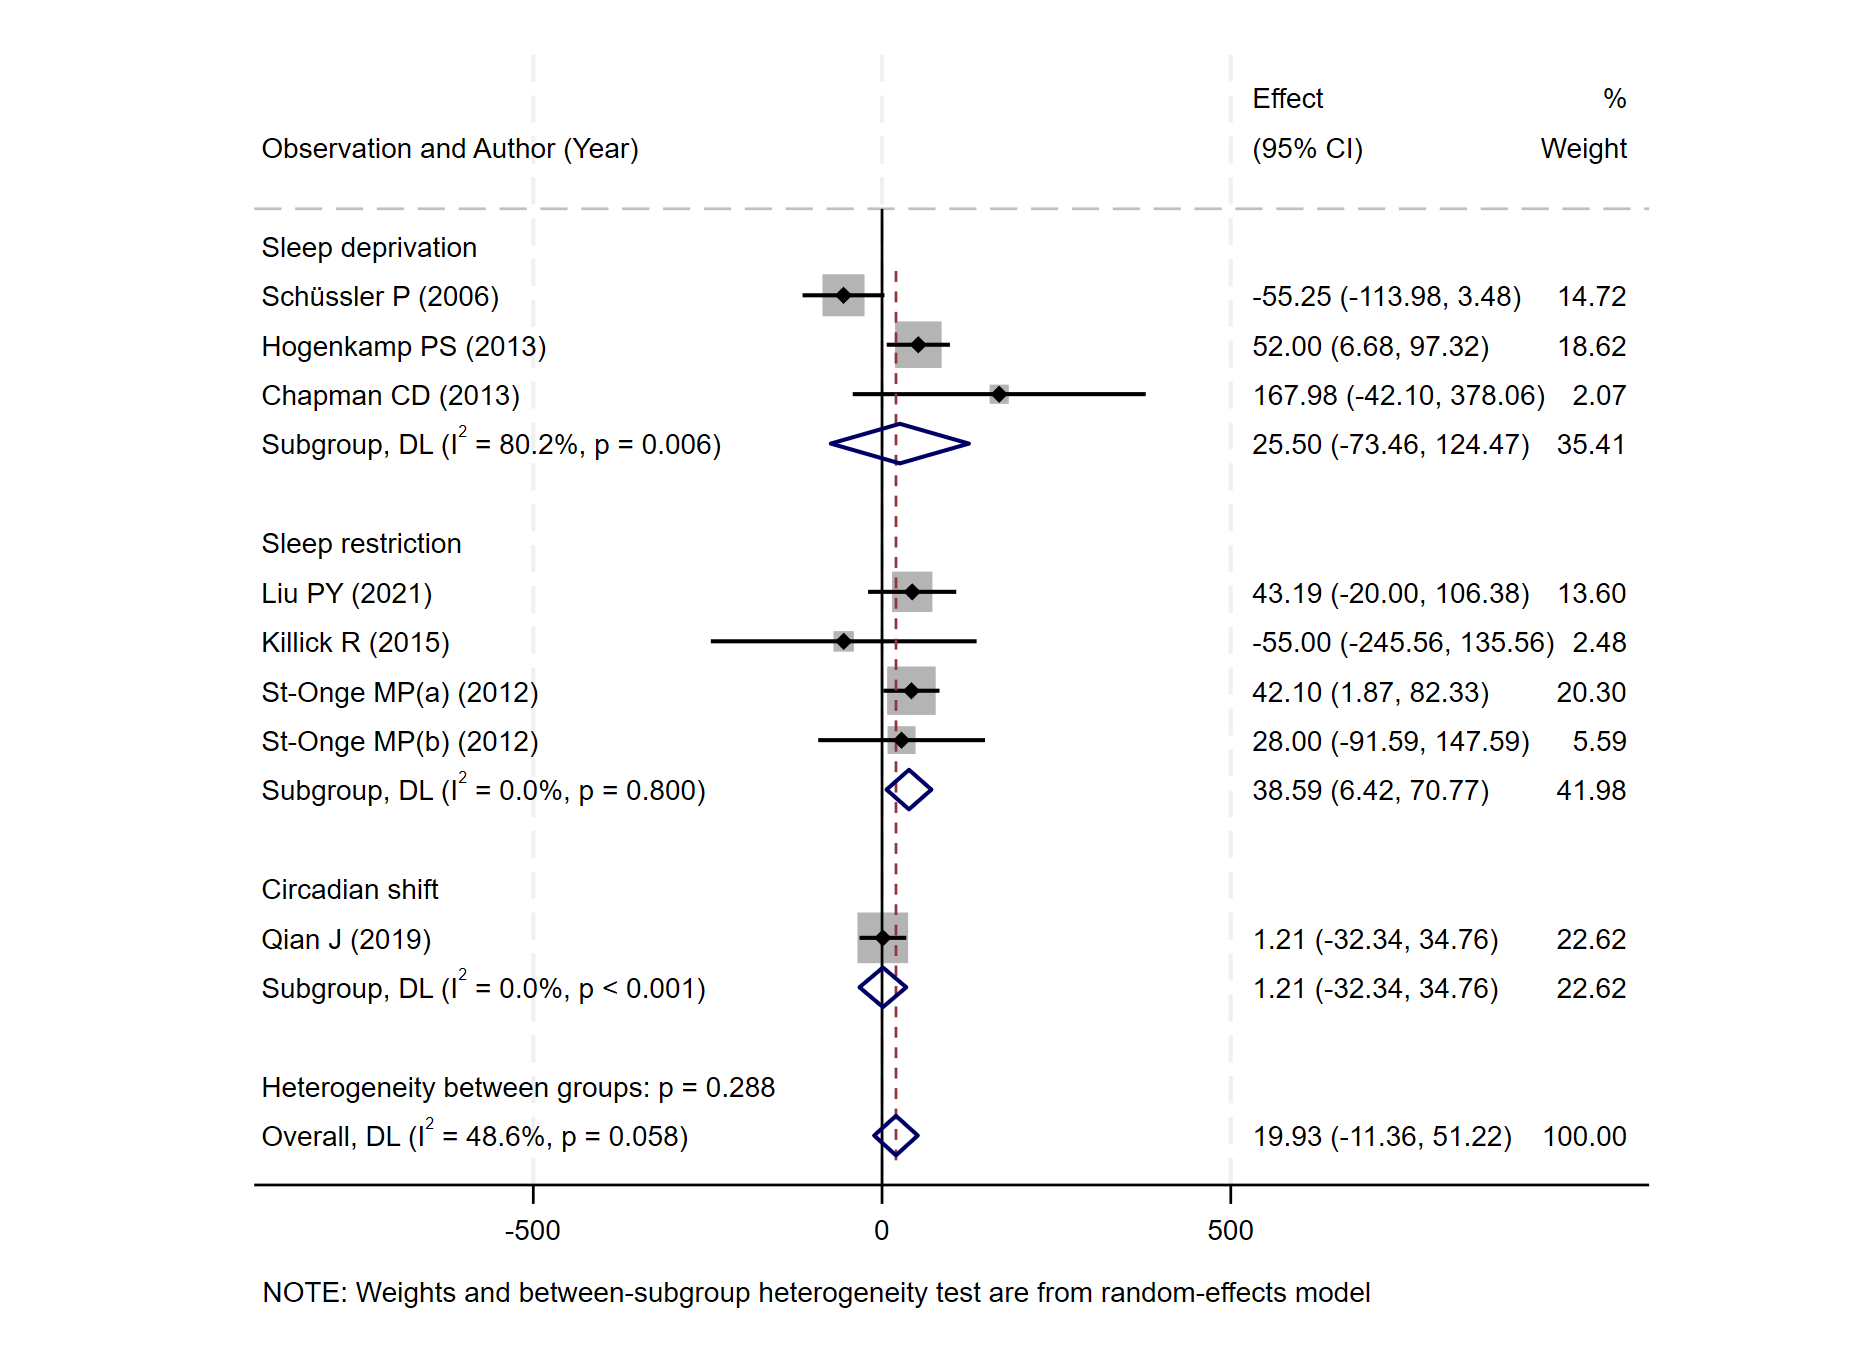


By observation - Sleep restriction, fixed effects model


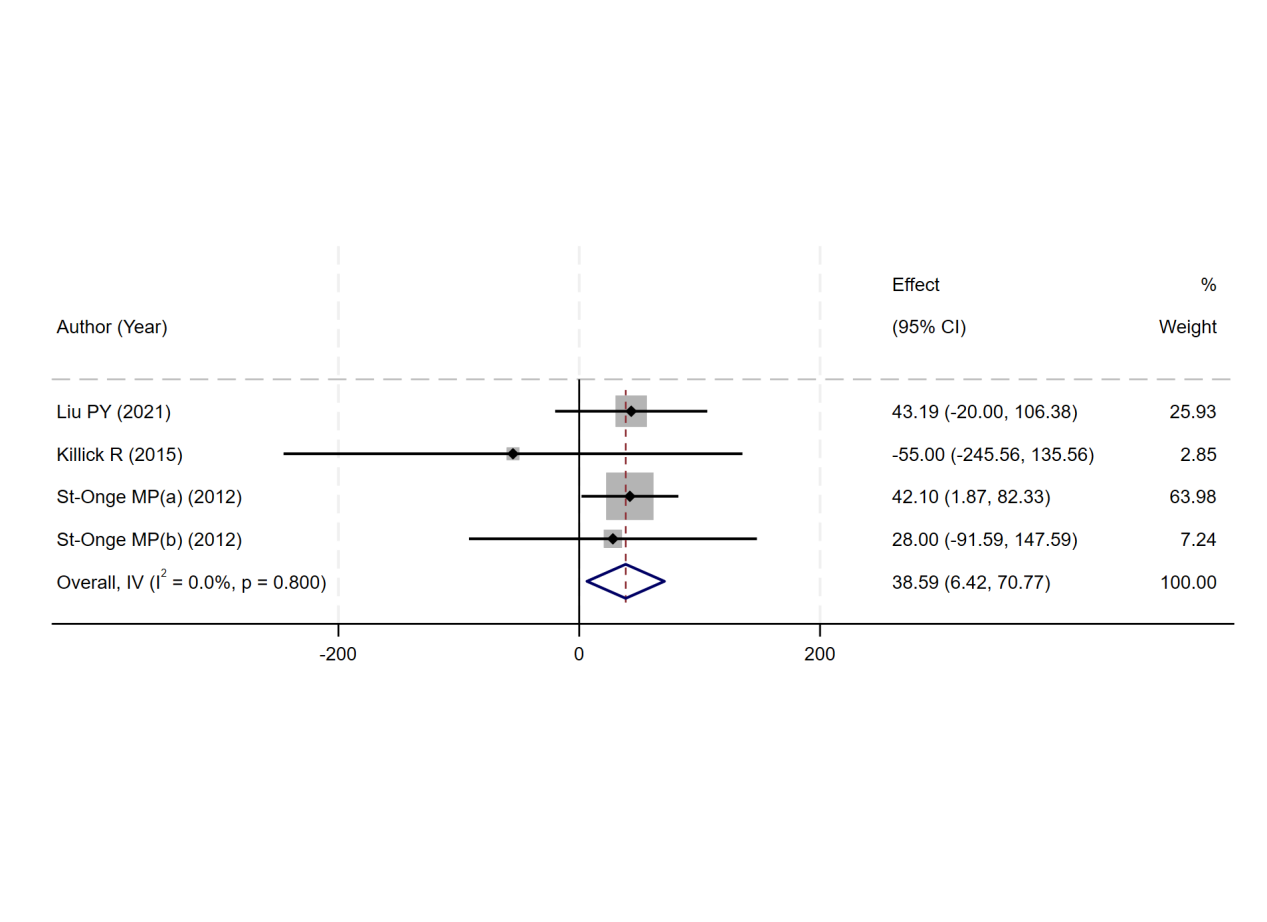


- - 1. By region, random effects model


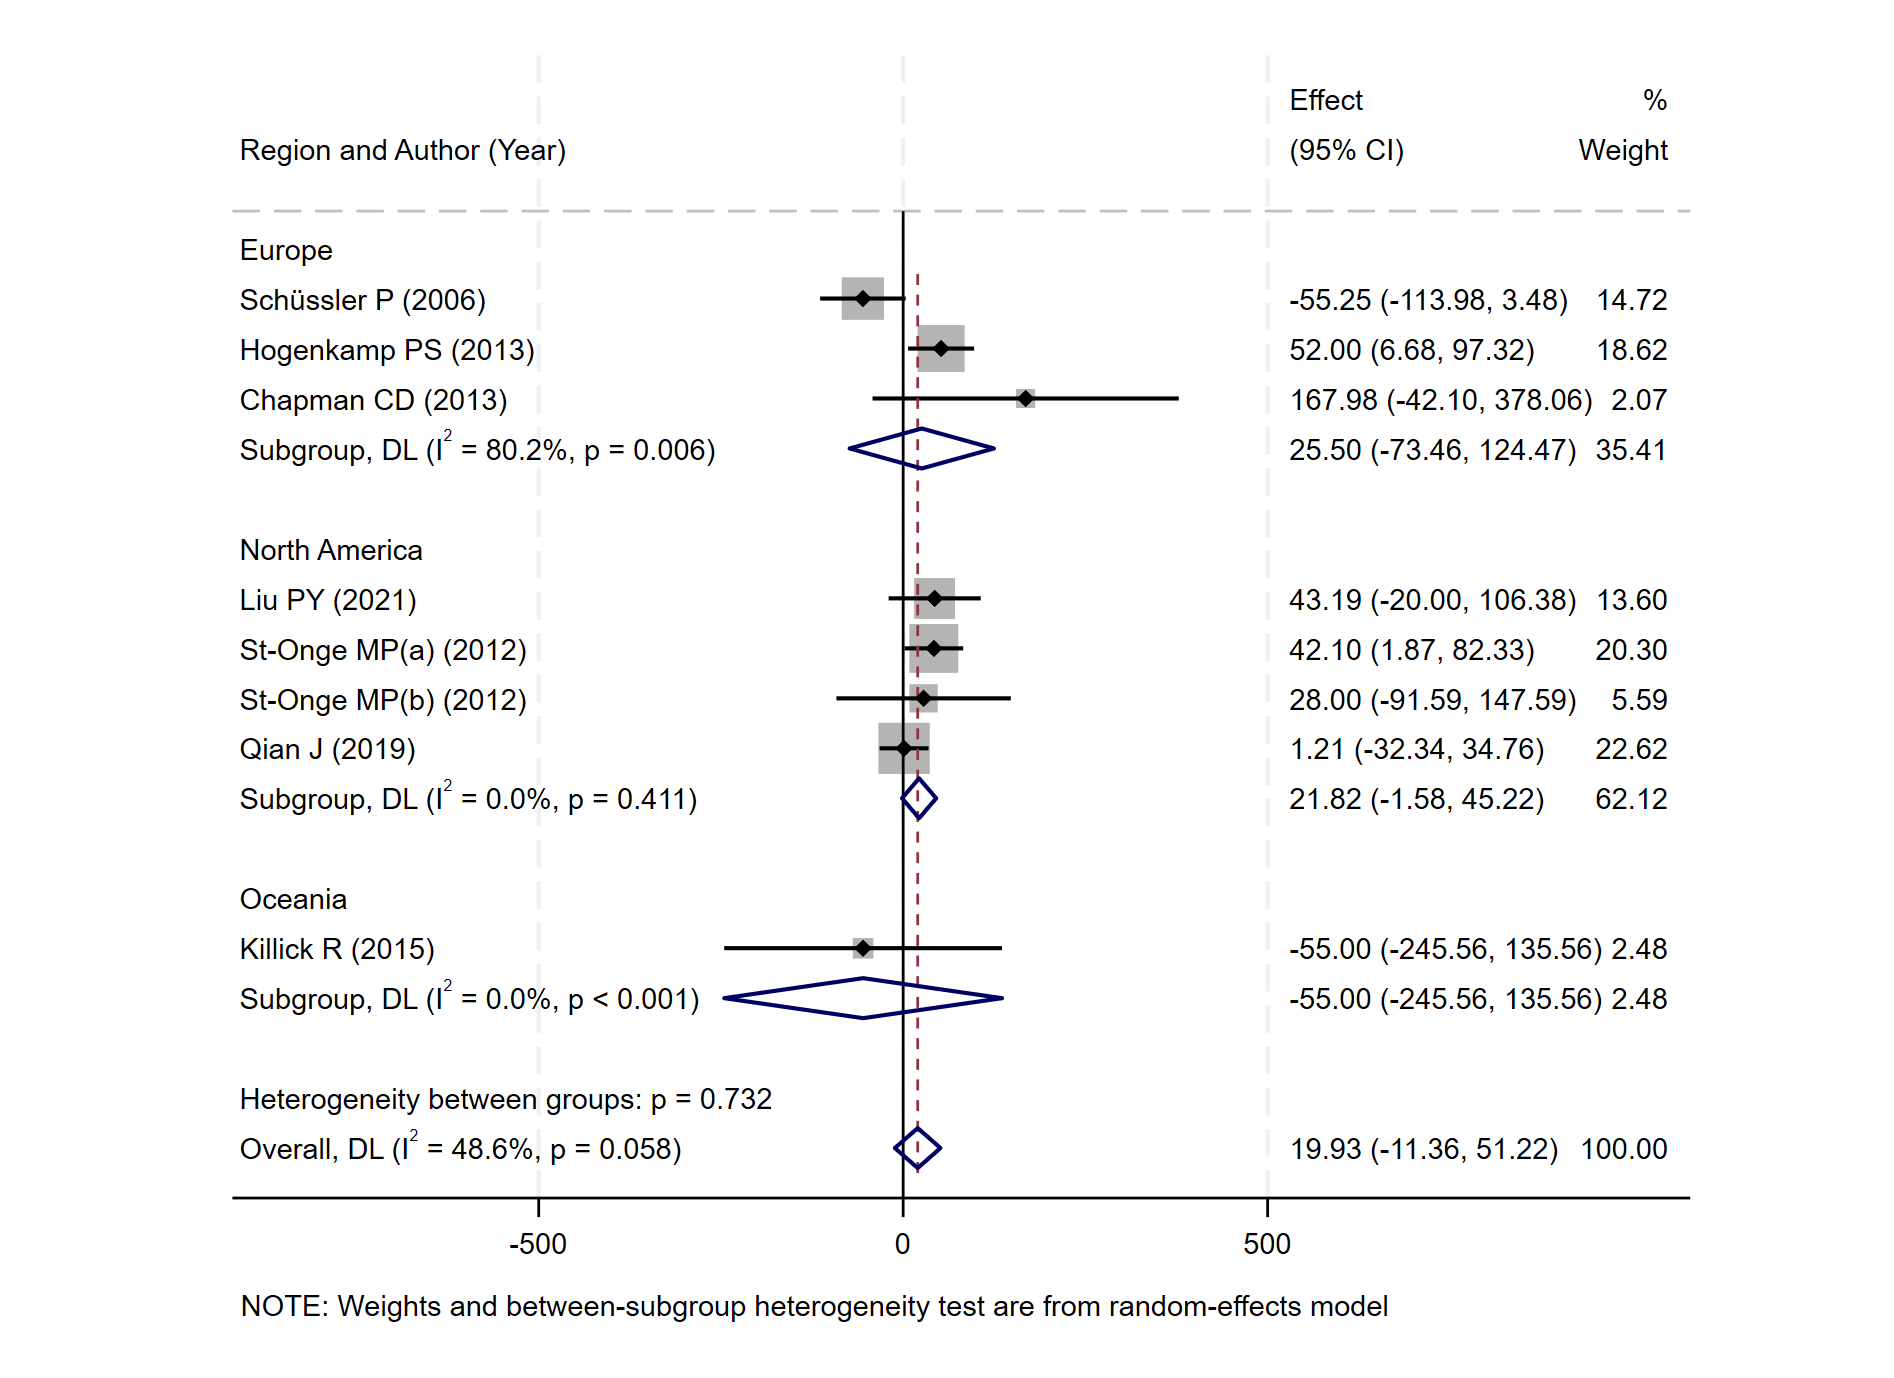


By region - North America, fixed effects model


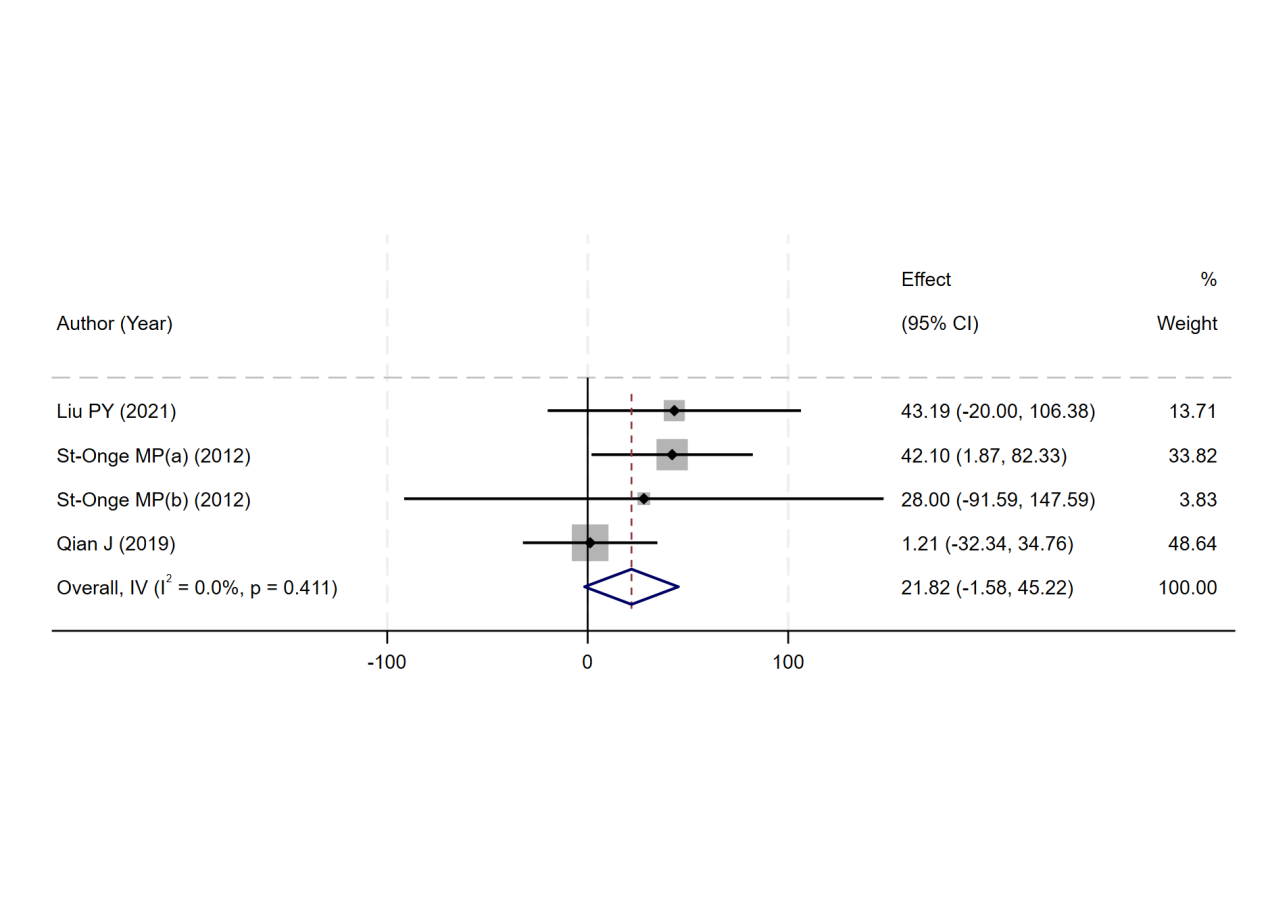


- - 1. By gender ratio (N(male)/N(female) > 1.5 = 1, ≤ 1.5 = 0), random effects model


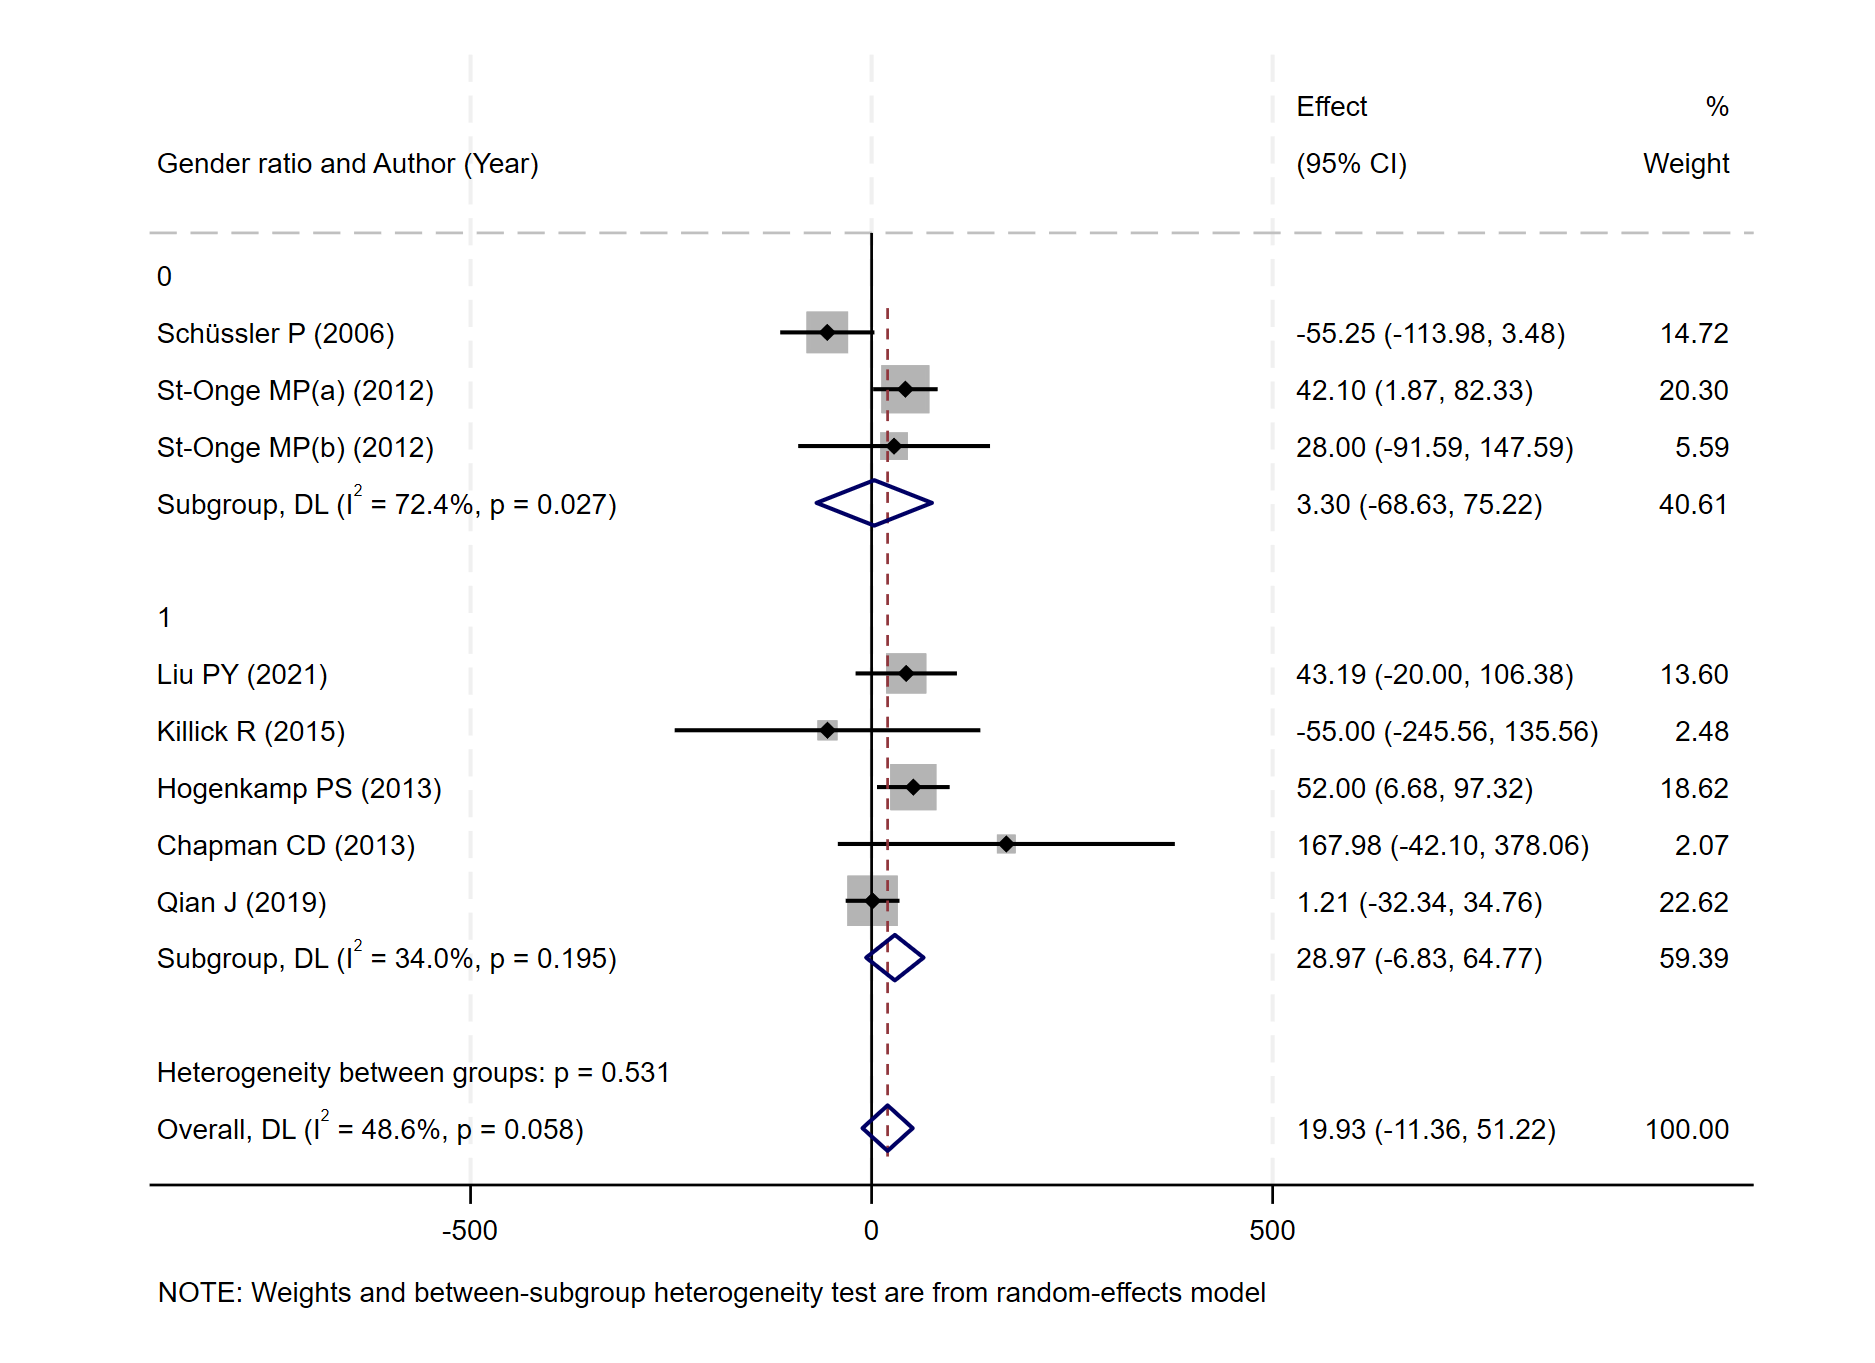


- - 1. By age range (mean value ≤ 30 = 0, mean > 30 = 1), random effects model


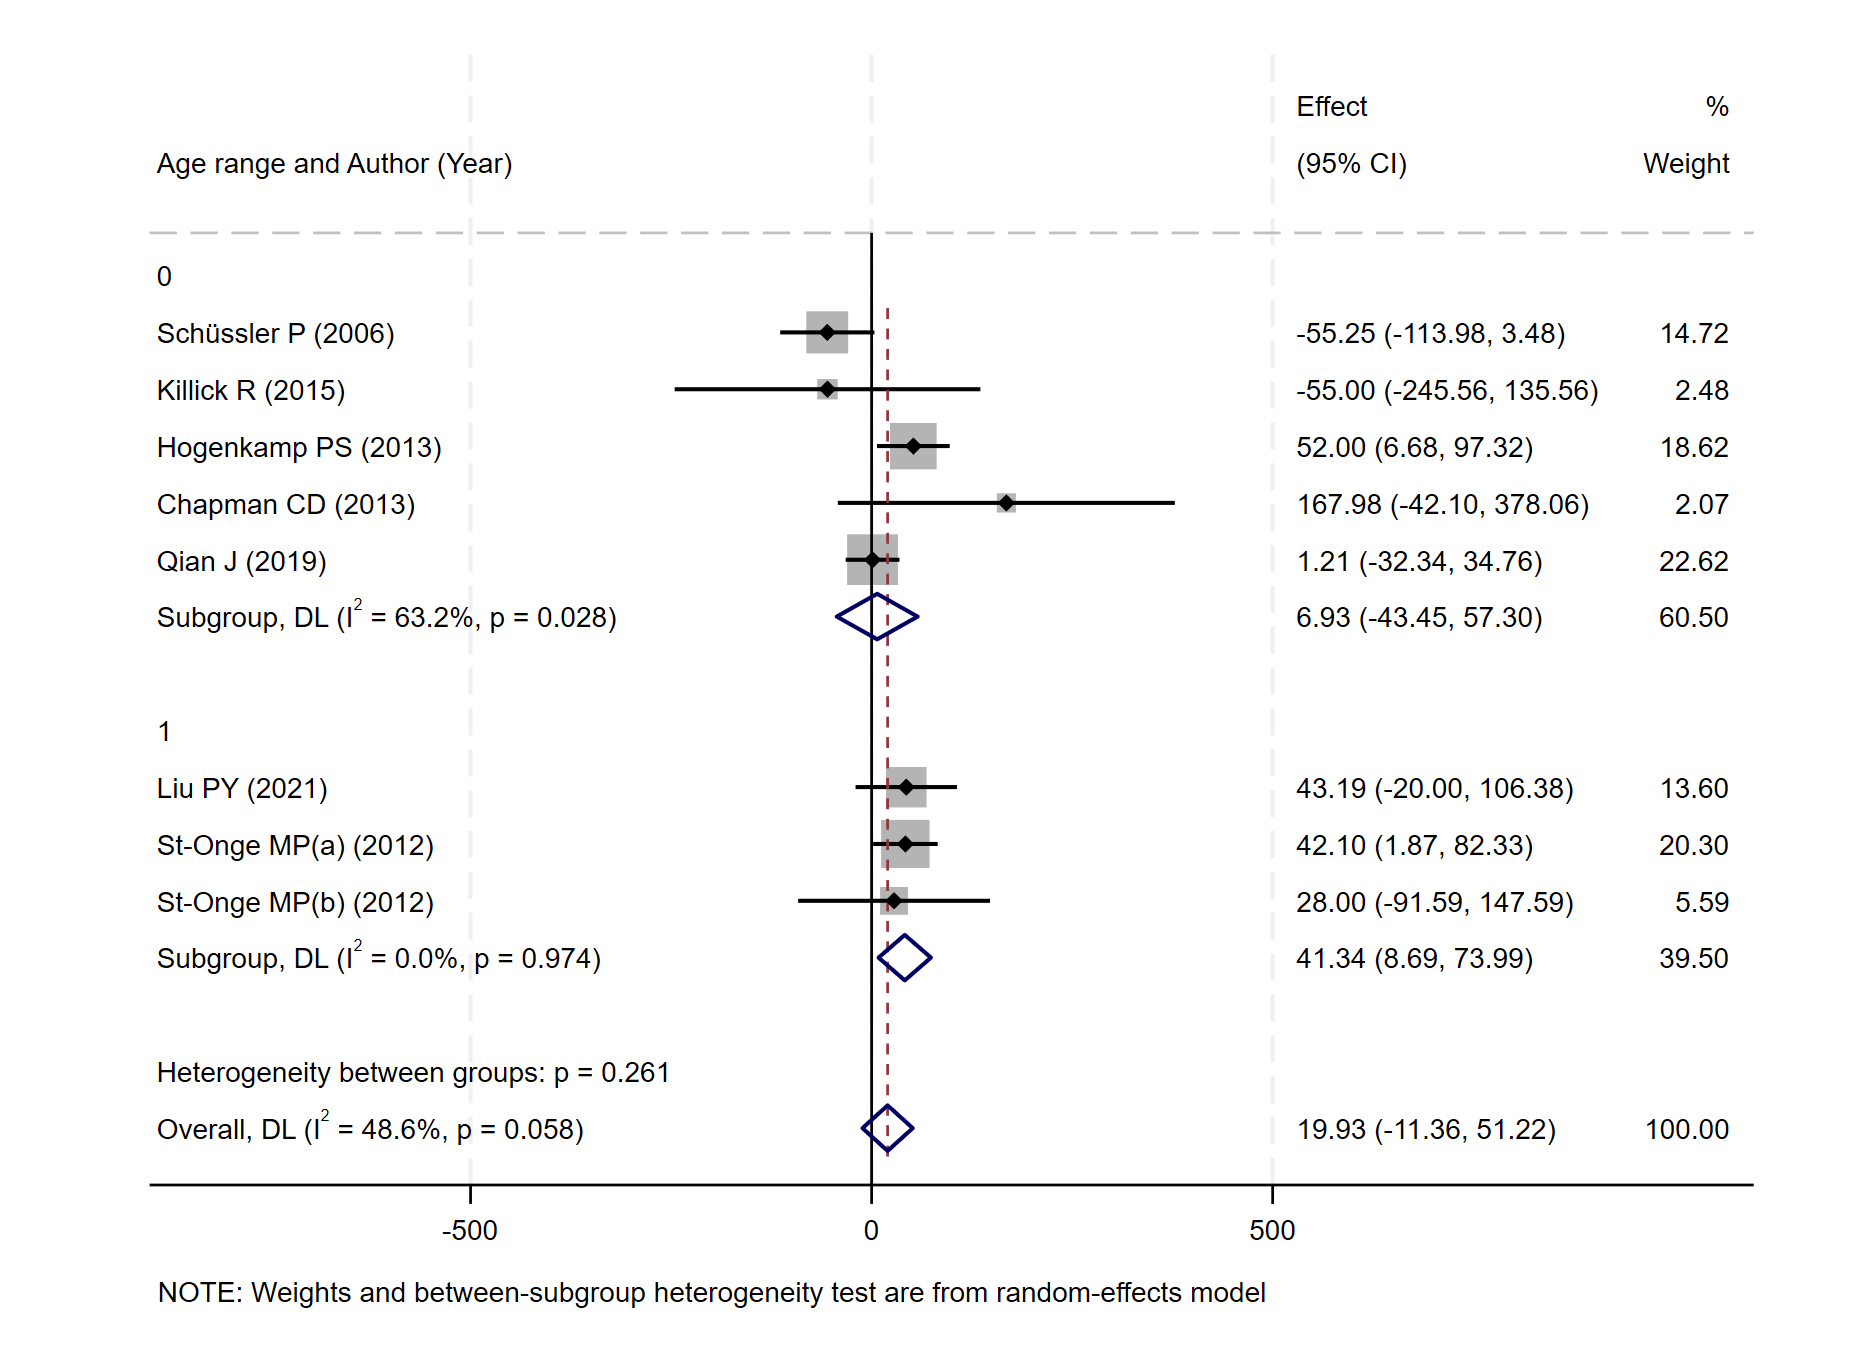


By age range - mean > 30, fixed effects model


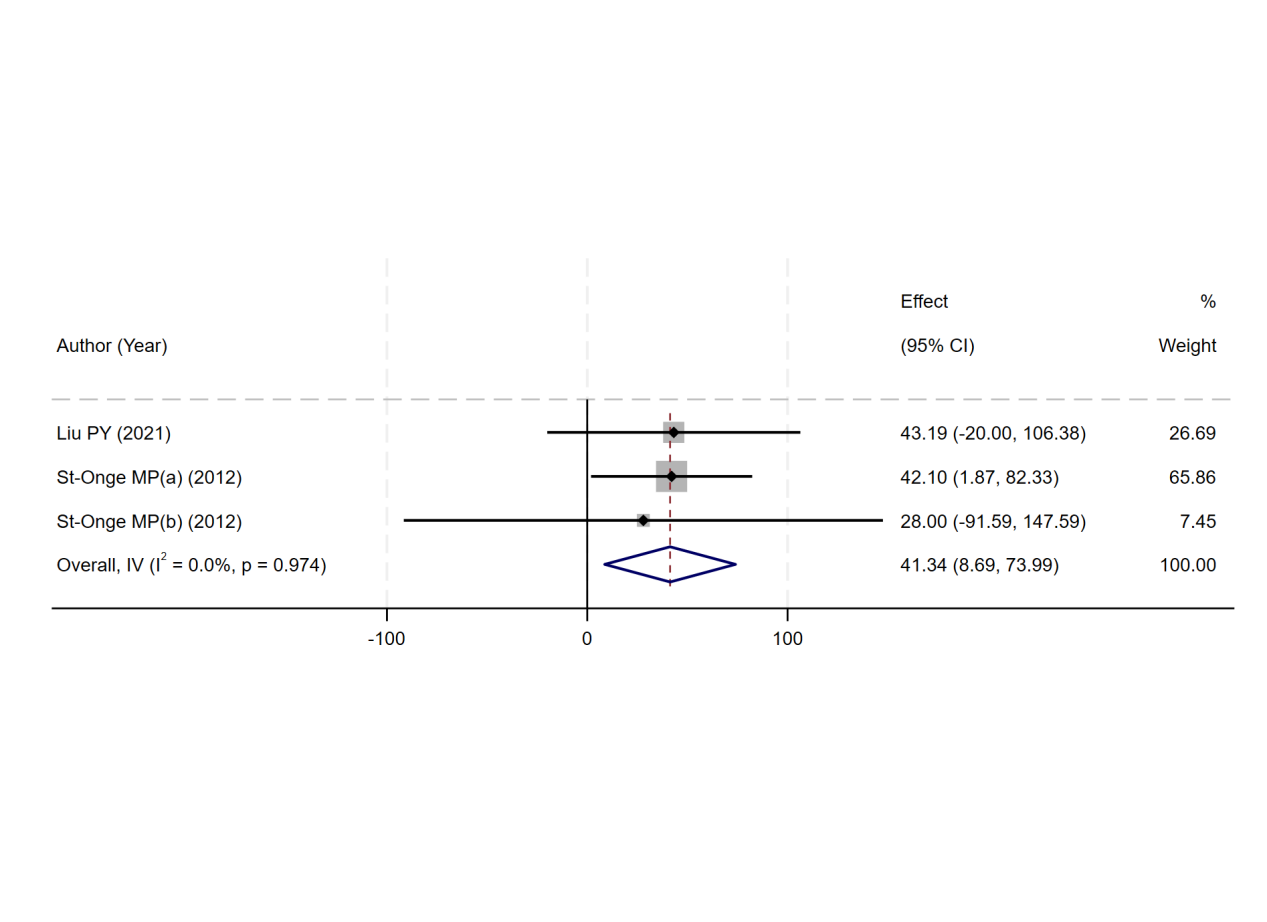


- 1. Fasting leptin
     1. By observation, random effects model


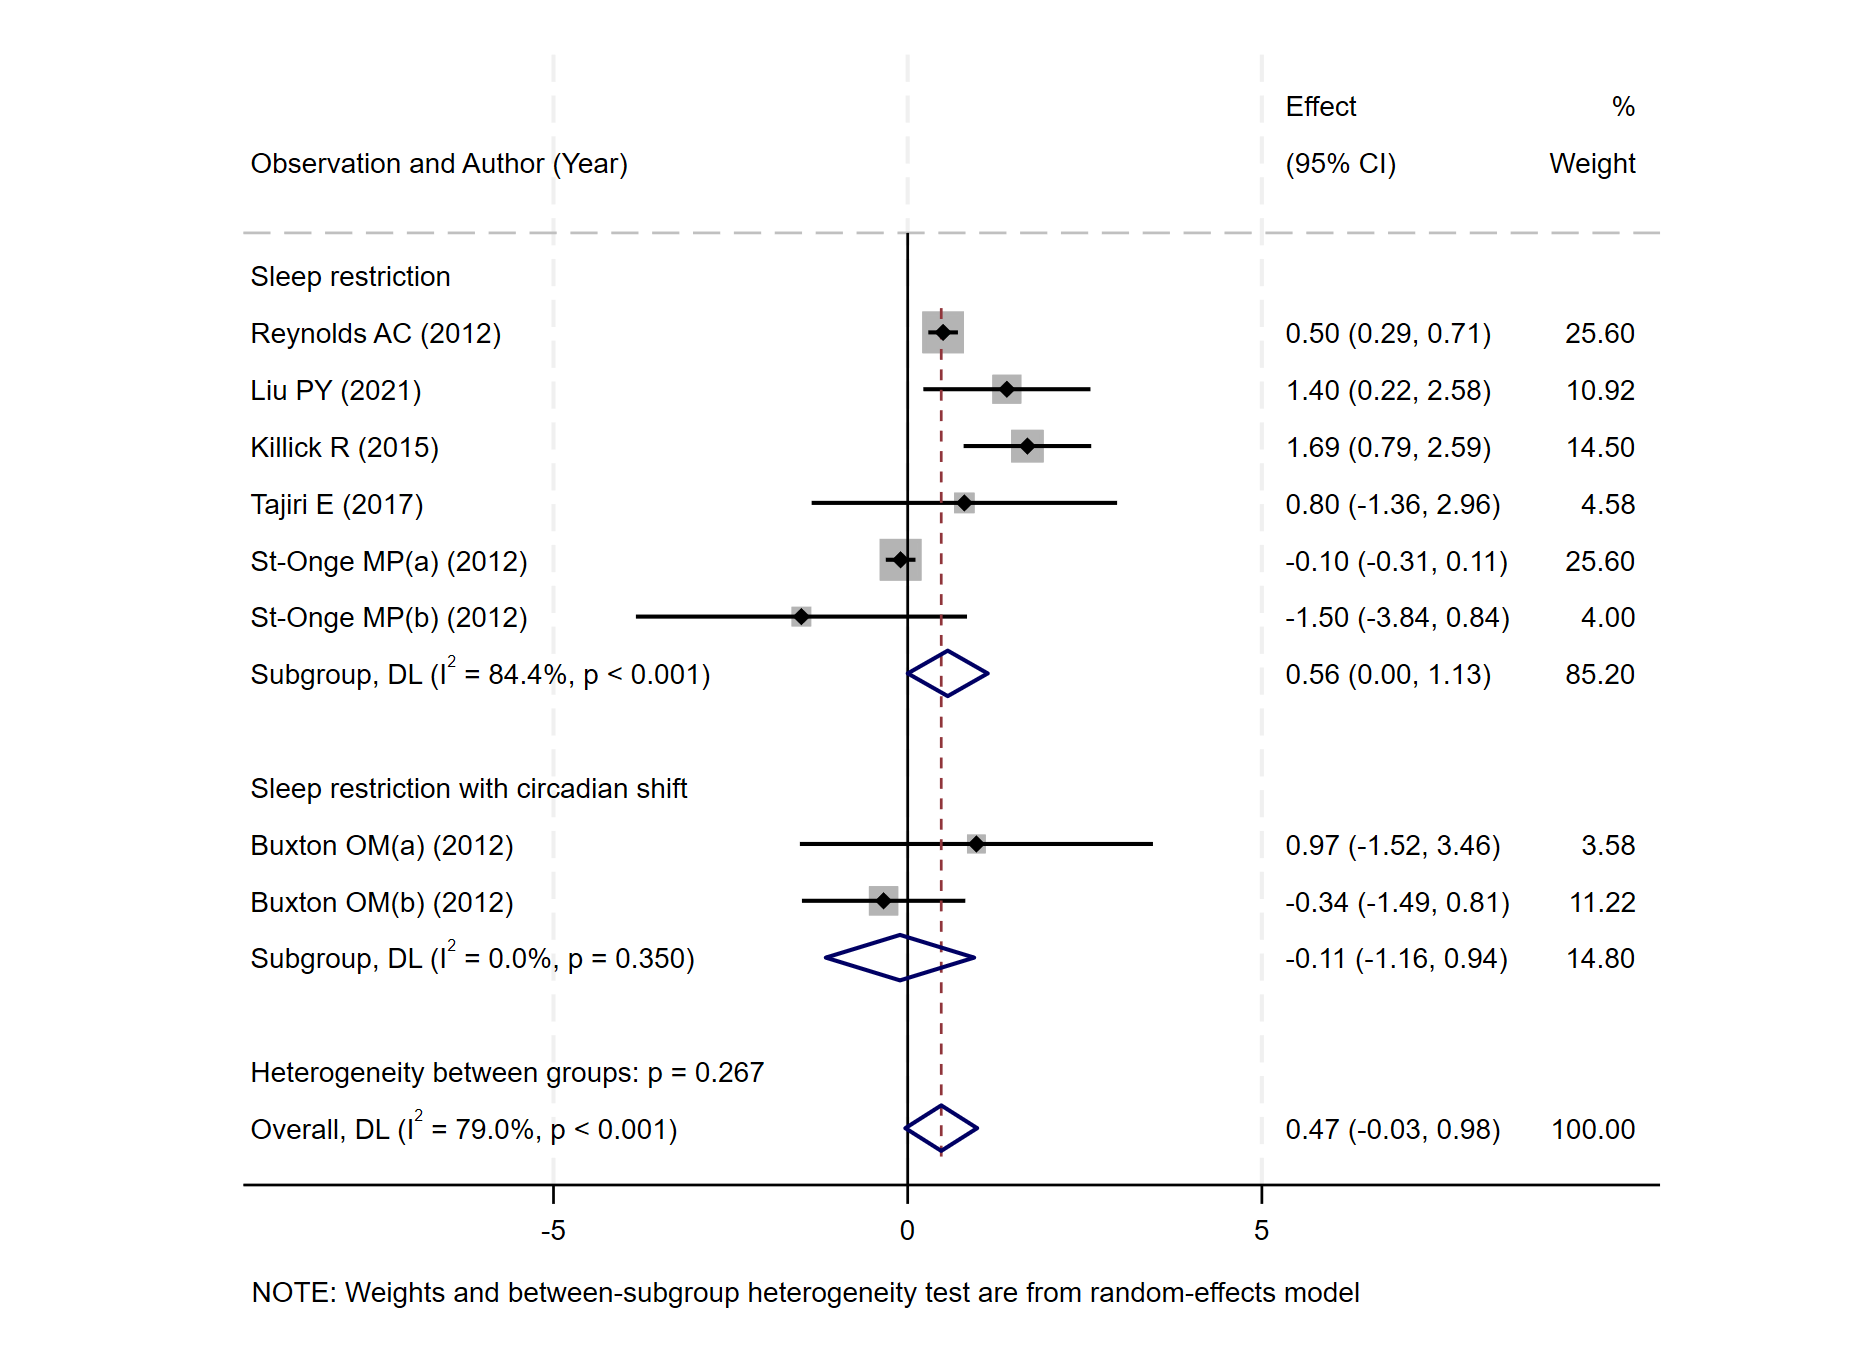


By observation - Sleep restriction with circadian shift, fixed effects model


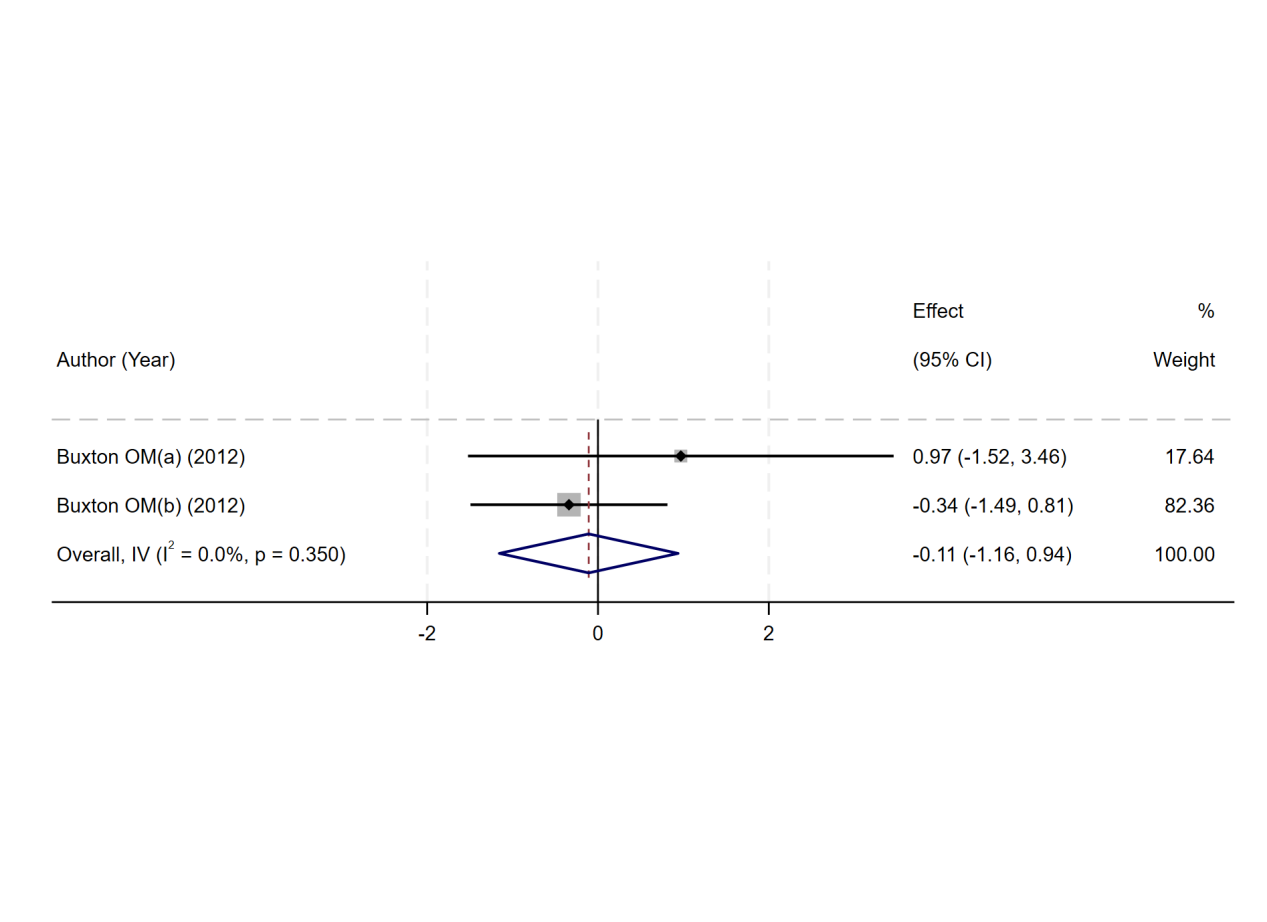


- - 1. By region, random effects model


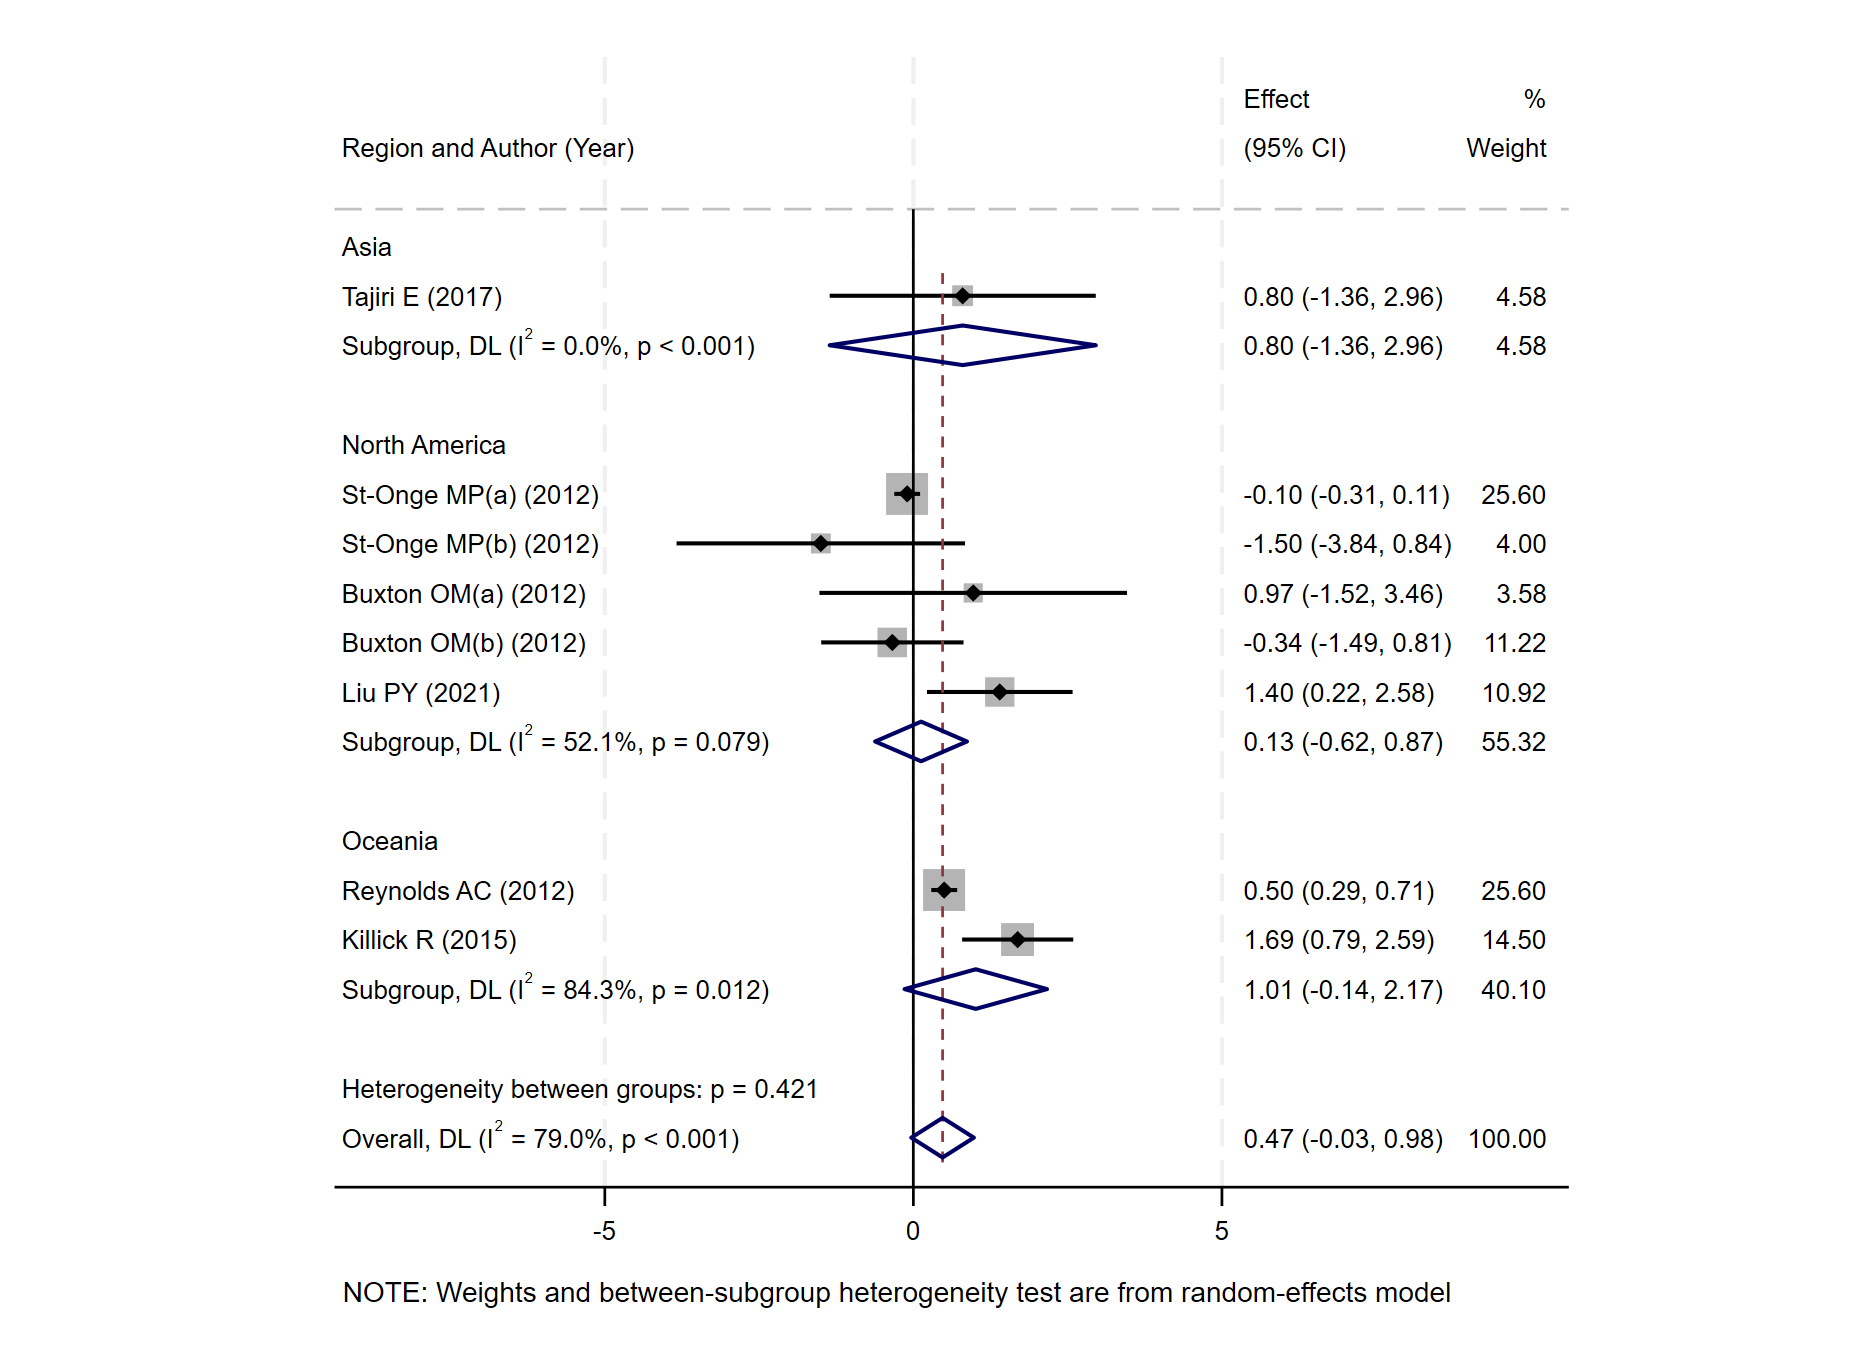


- - 1. By gender ratio (N(male)/N(female) > 1.5 = 1, ≤ 1.5 = 0), random effects model


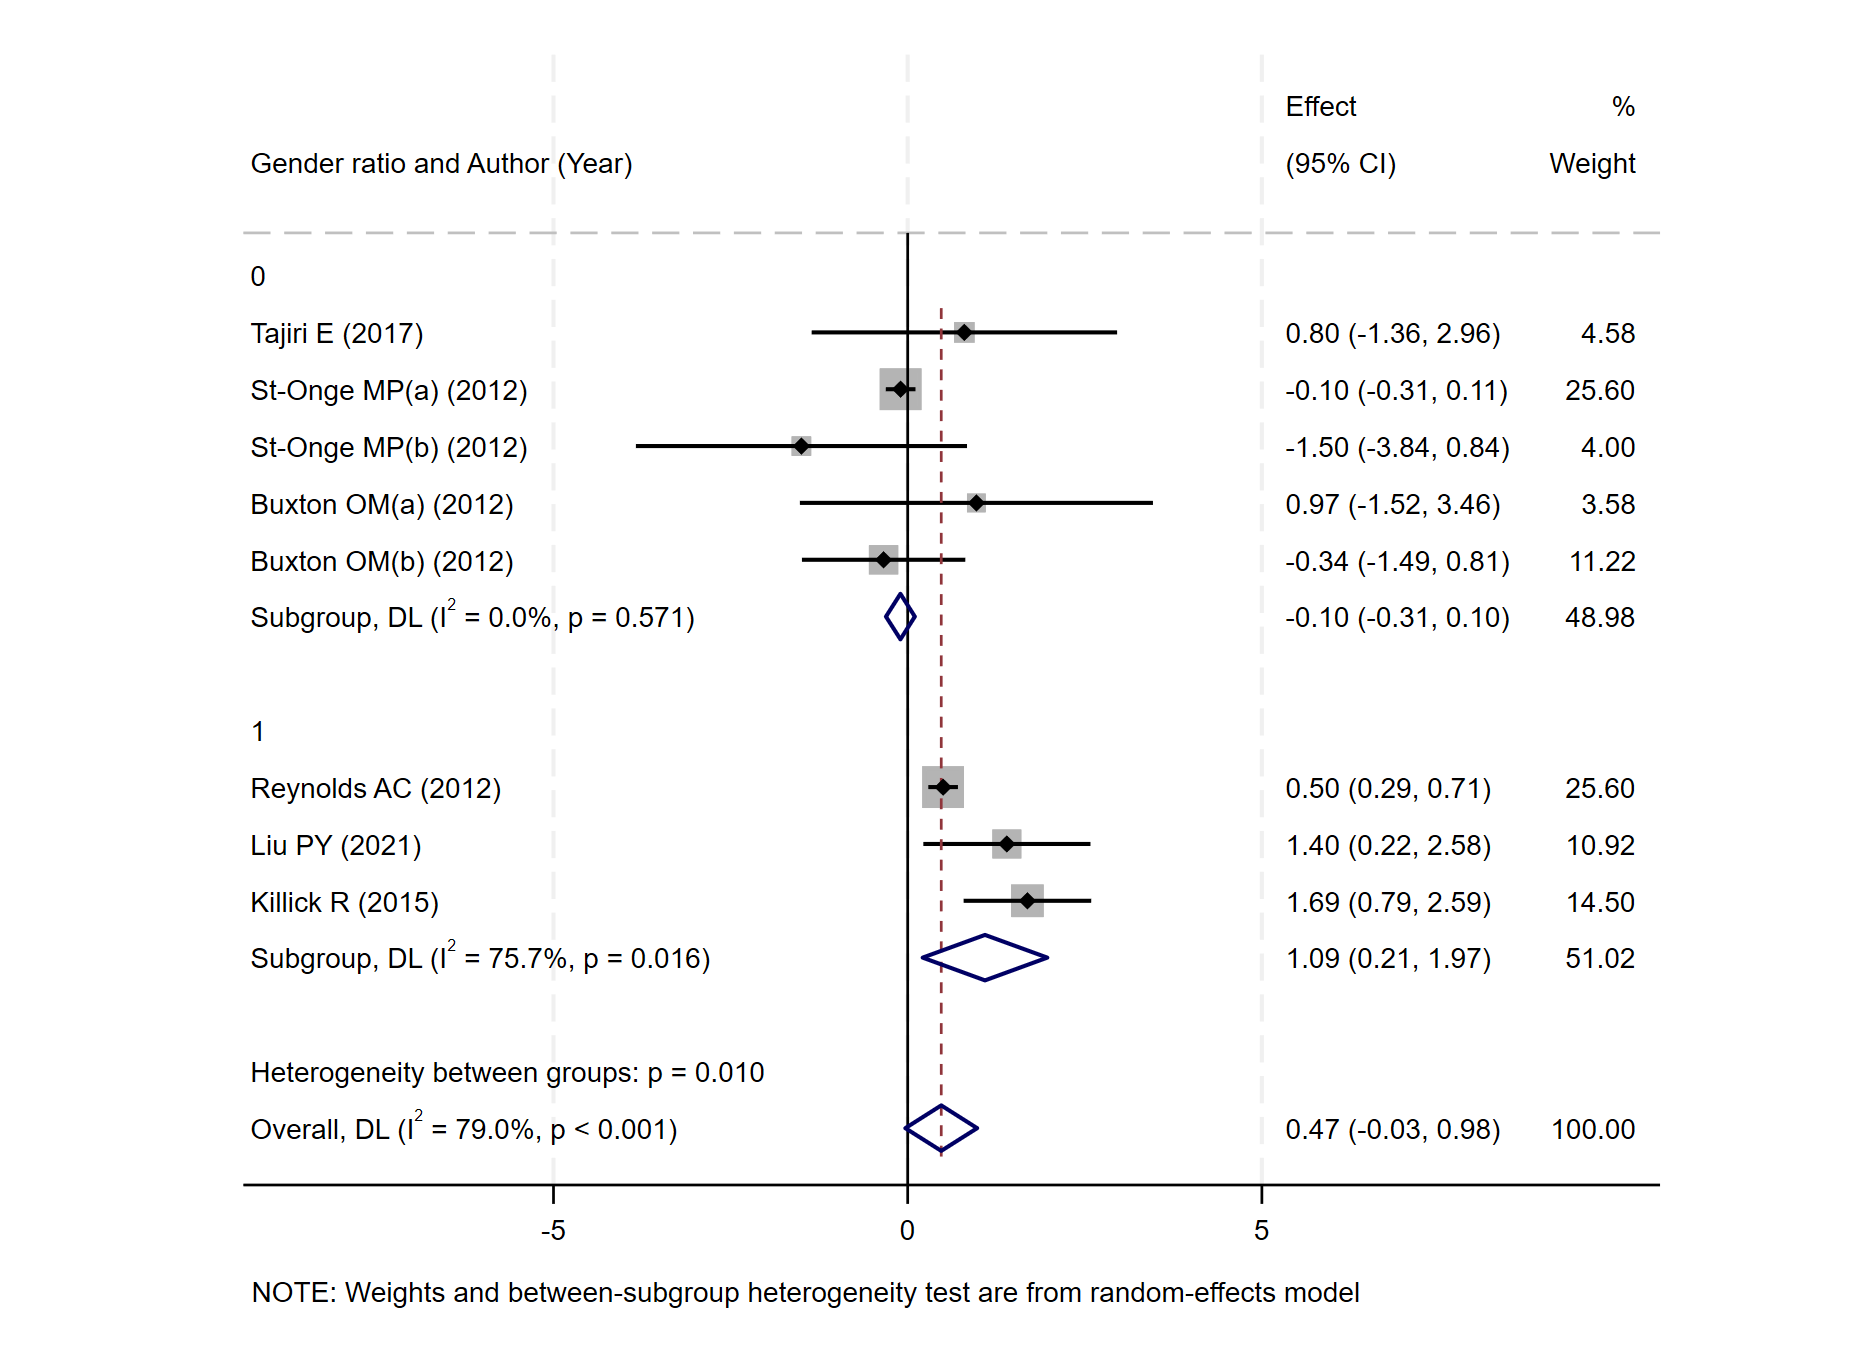


By gender ratio - N(male)/N(female) ≤ 1.5, fixed effects model


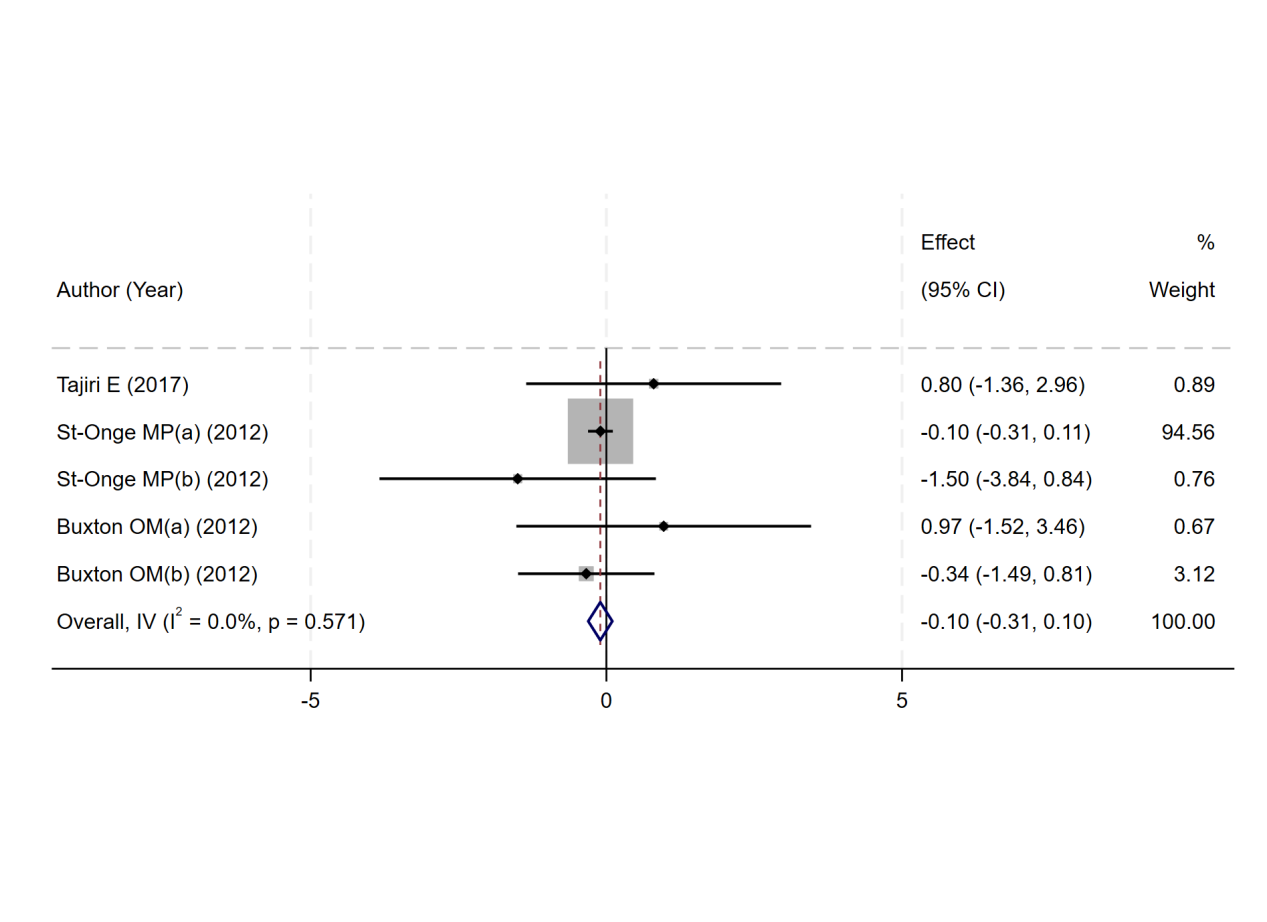


- - 1. By age range (mean value ≤ 30 = 0, mean > 30 = 1), random effects model


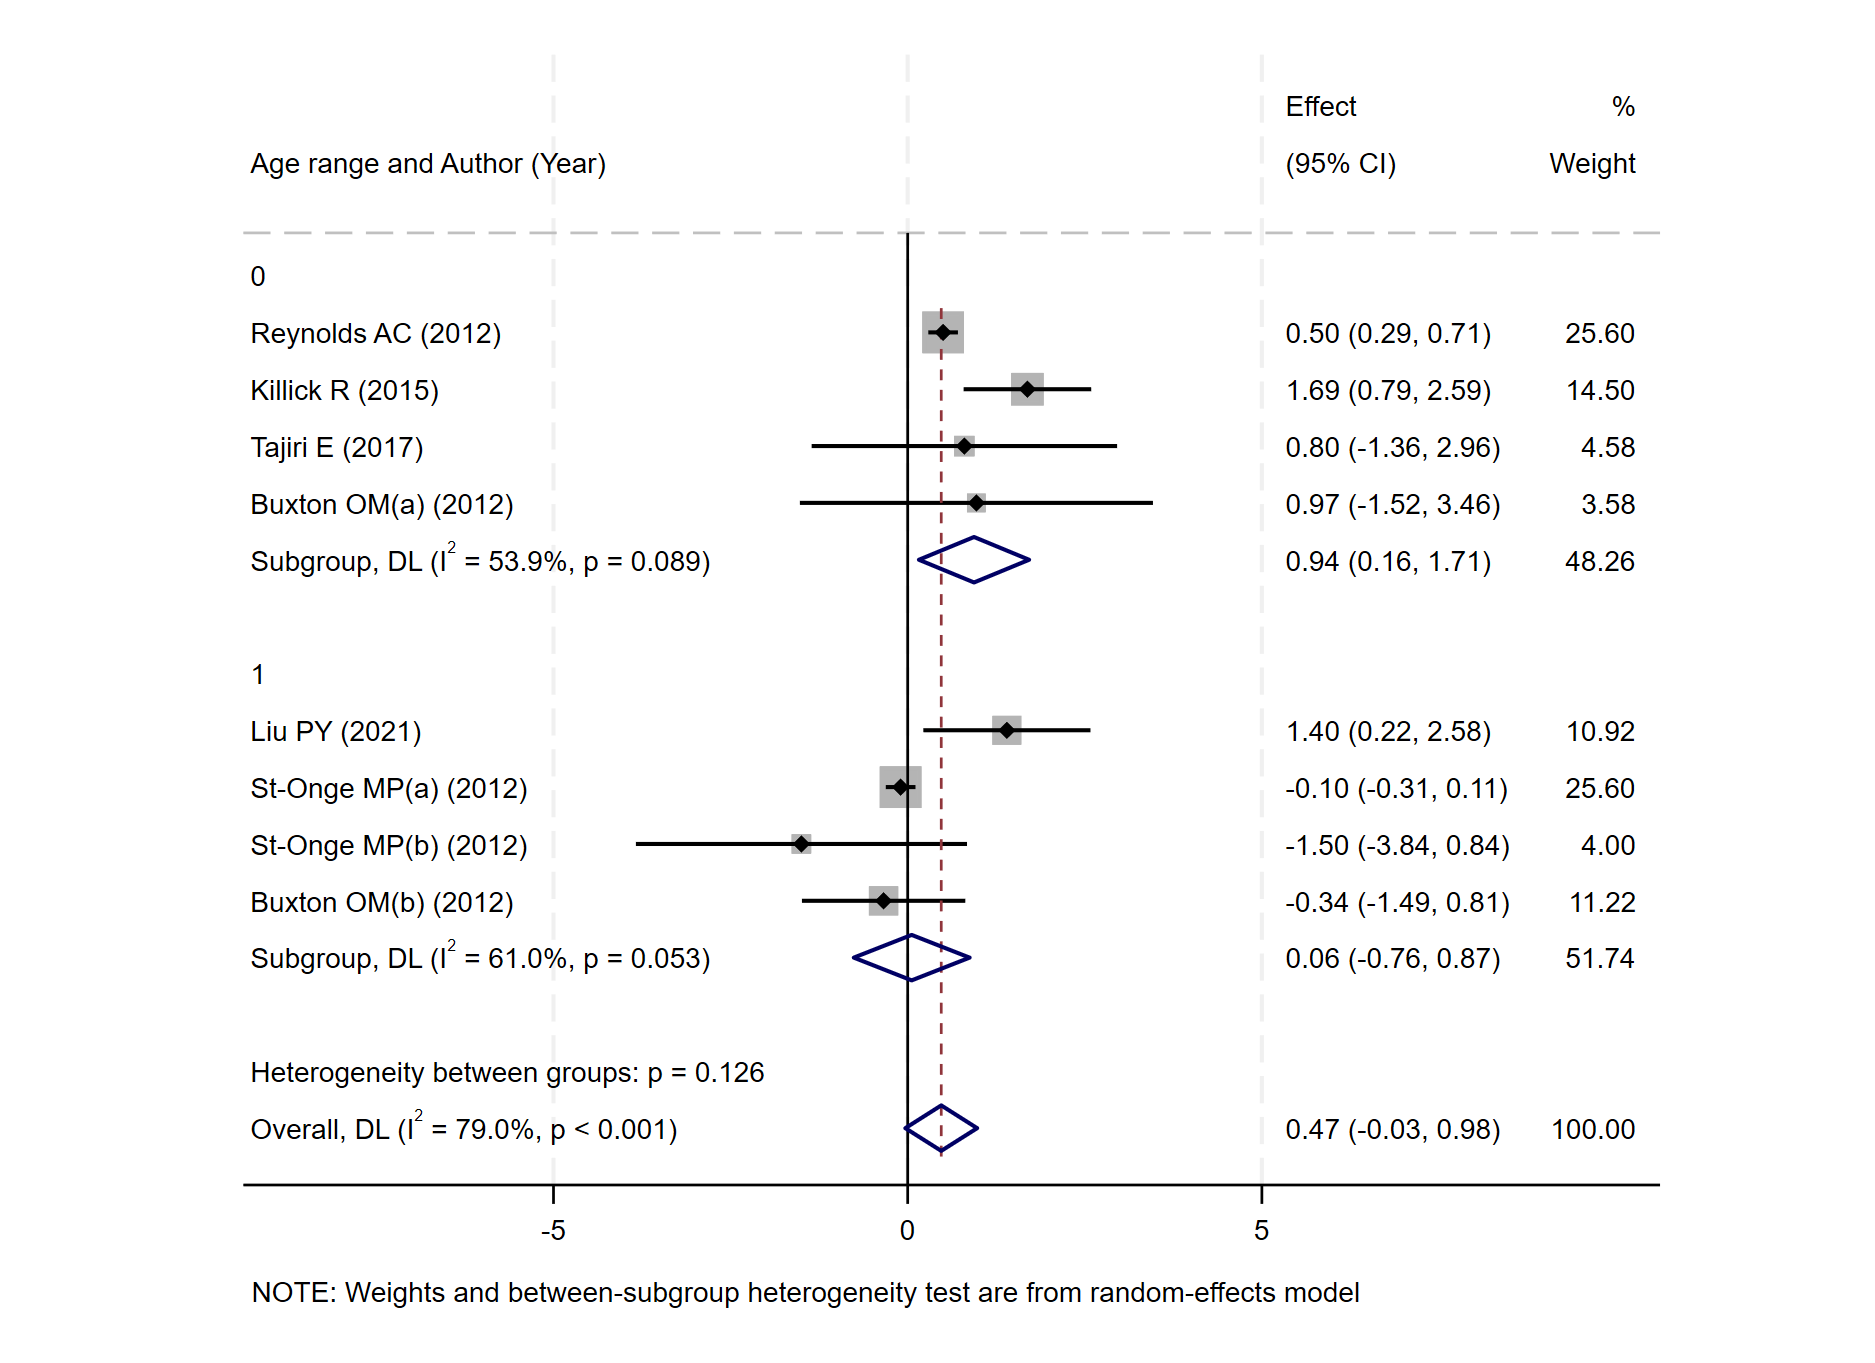


- 1. 24h average leptin
     1. By observation, random effects model


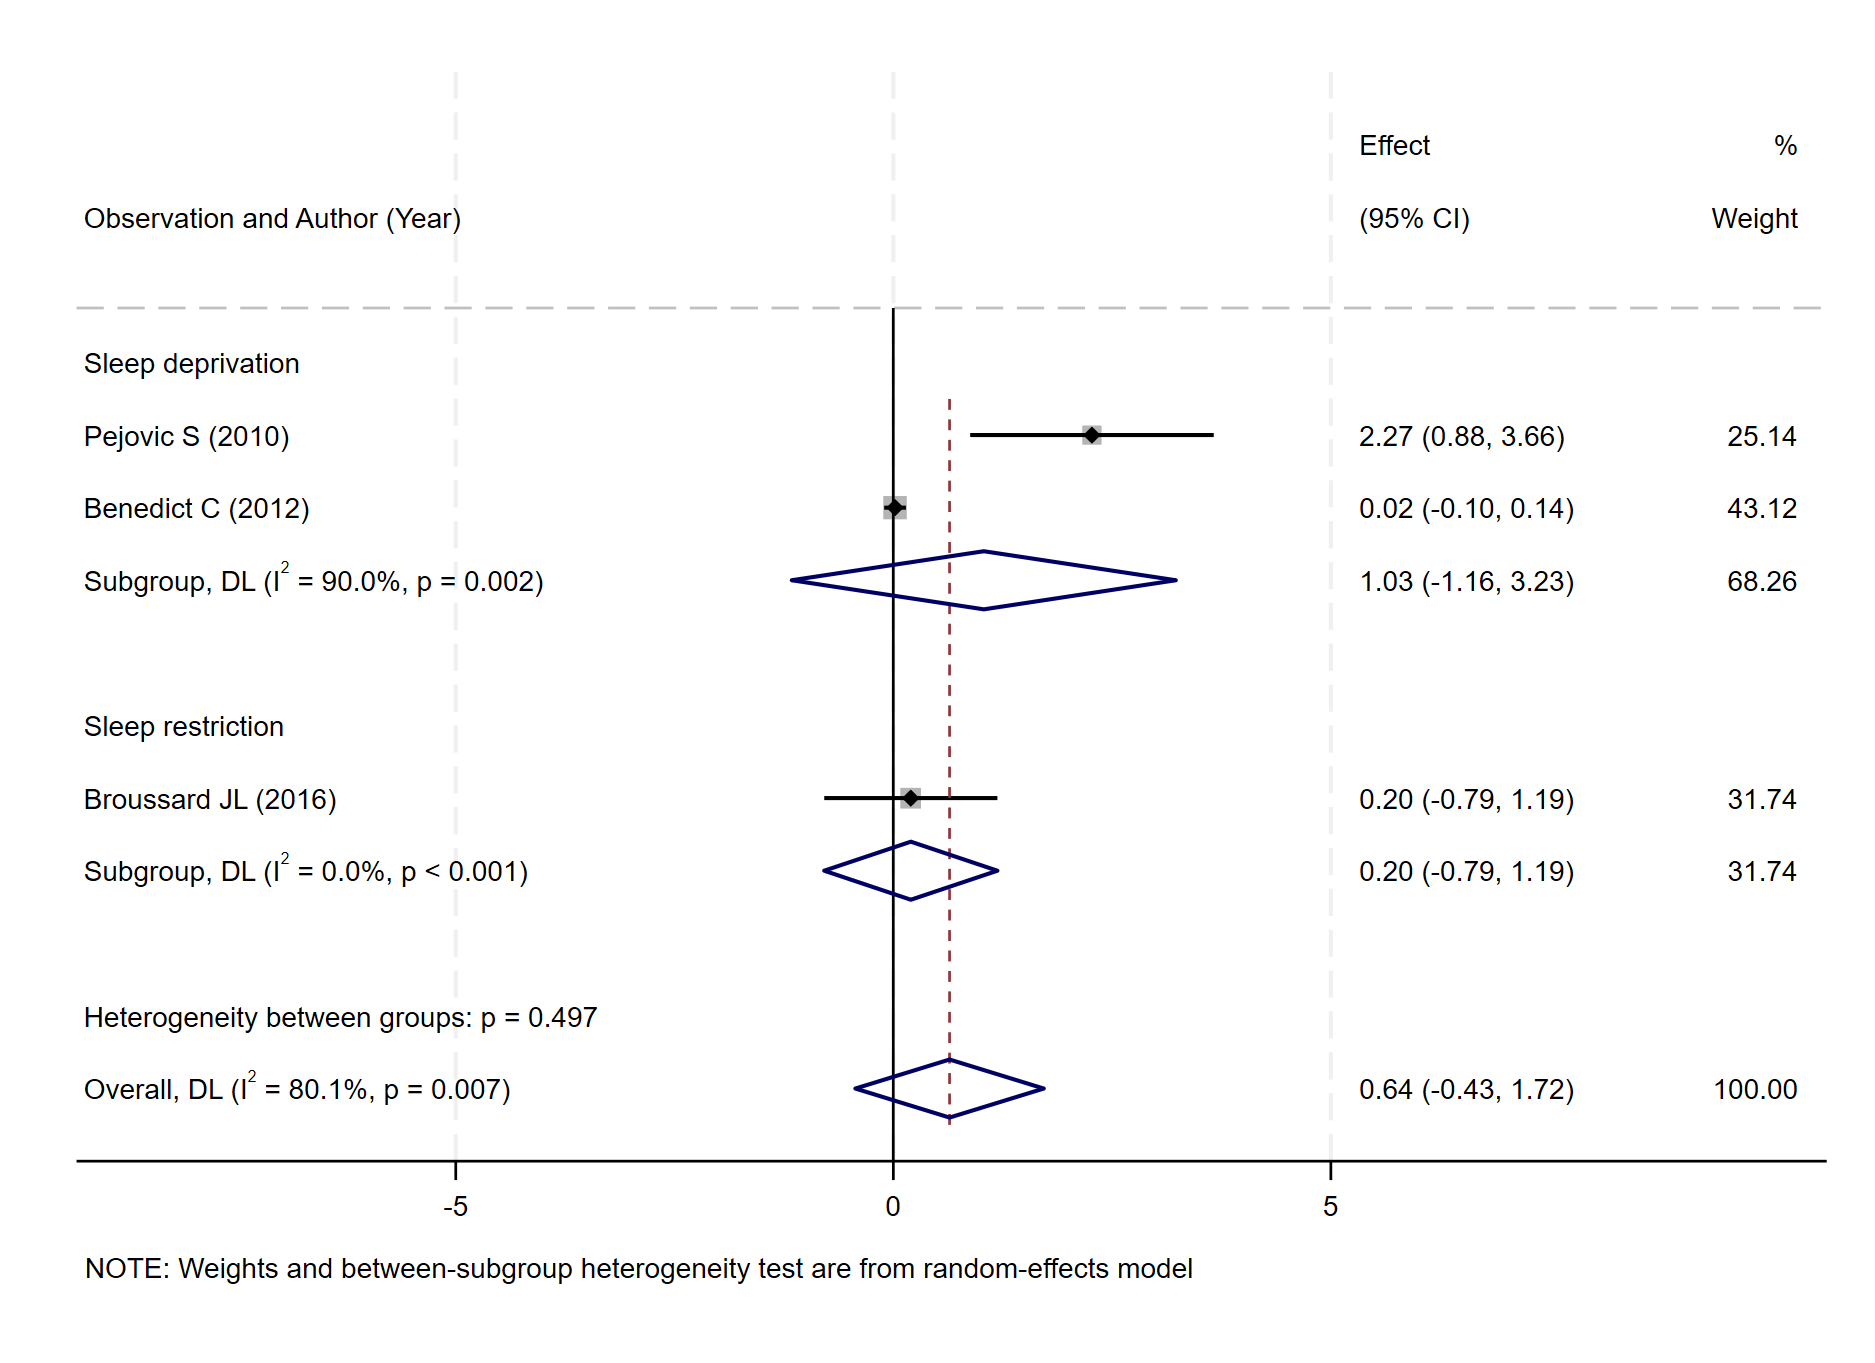


- - 1. By region, random effects model


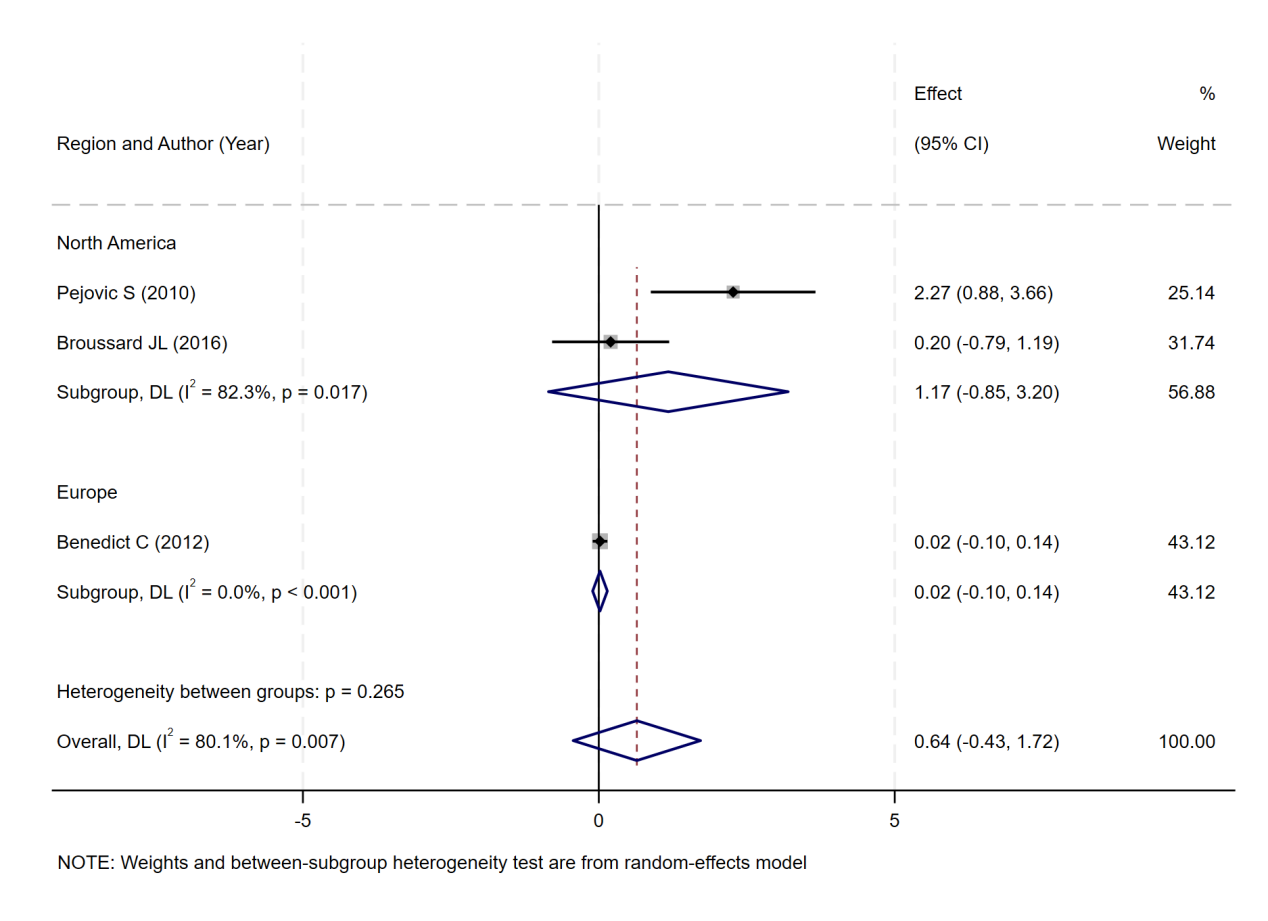


- - 1. By gender ratio (N(male)/N(female) > 1.5 = 1, ≤ 1.5 = 0), fixed effects model


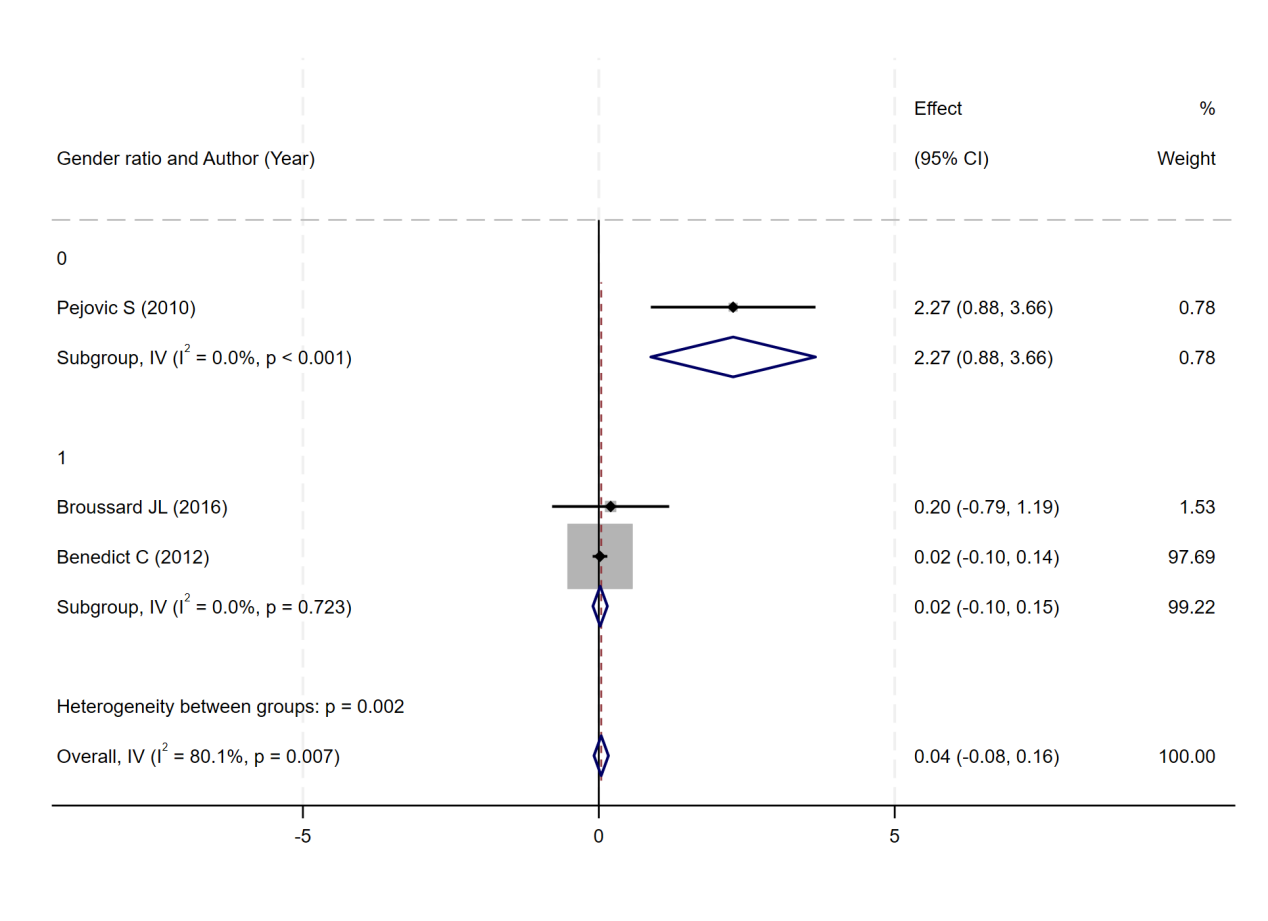


- 1. Fasting cortisol
     1. By observation, random effects model


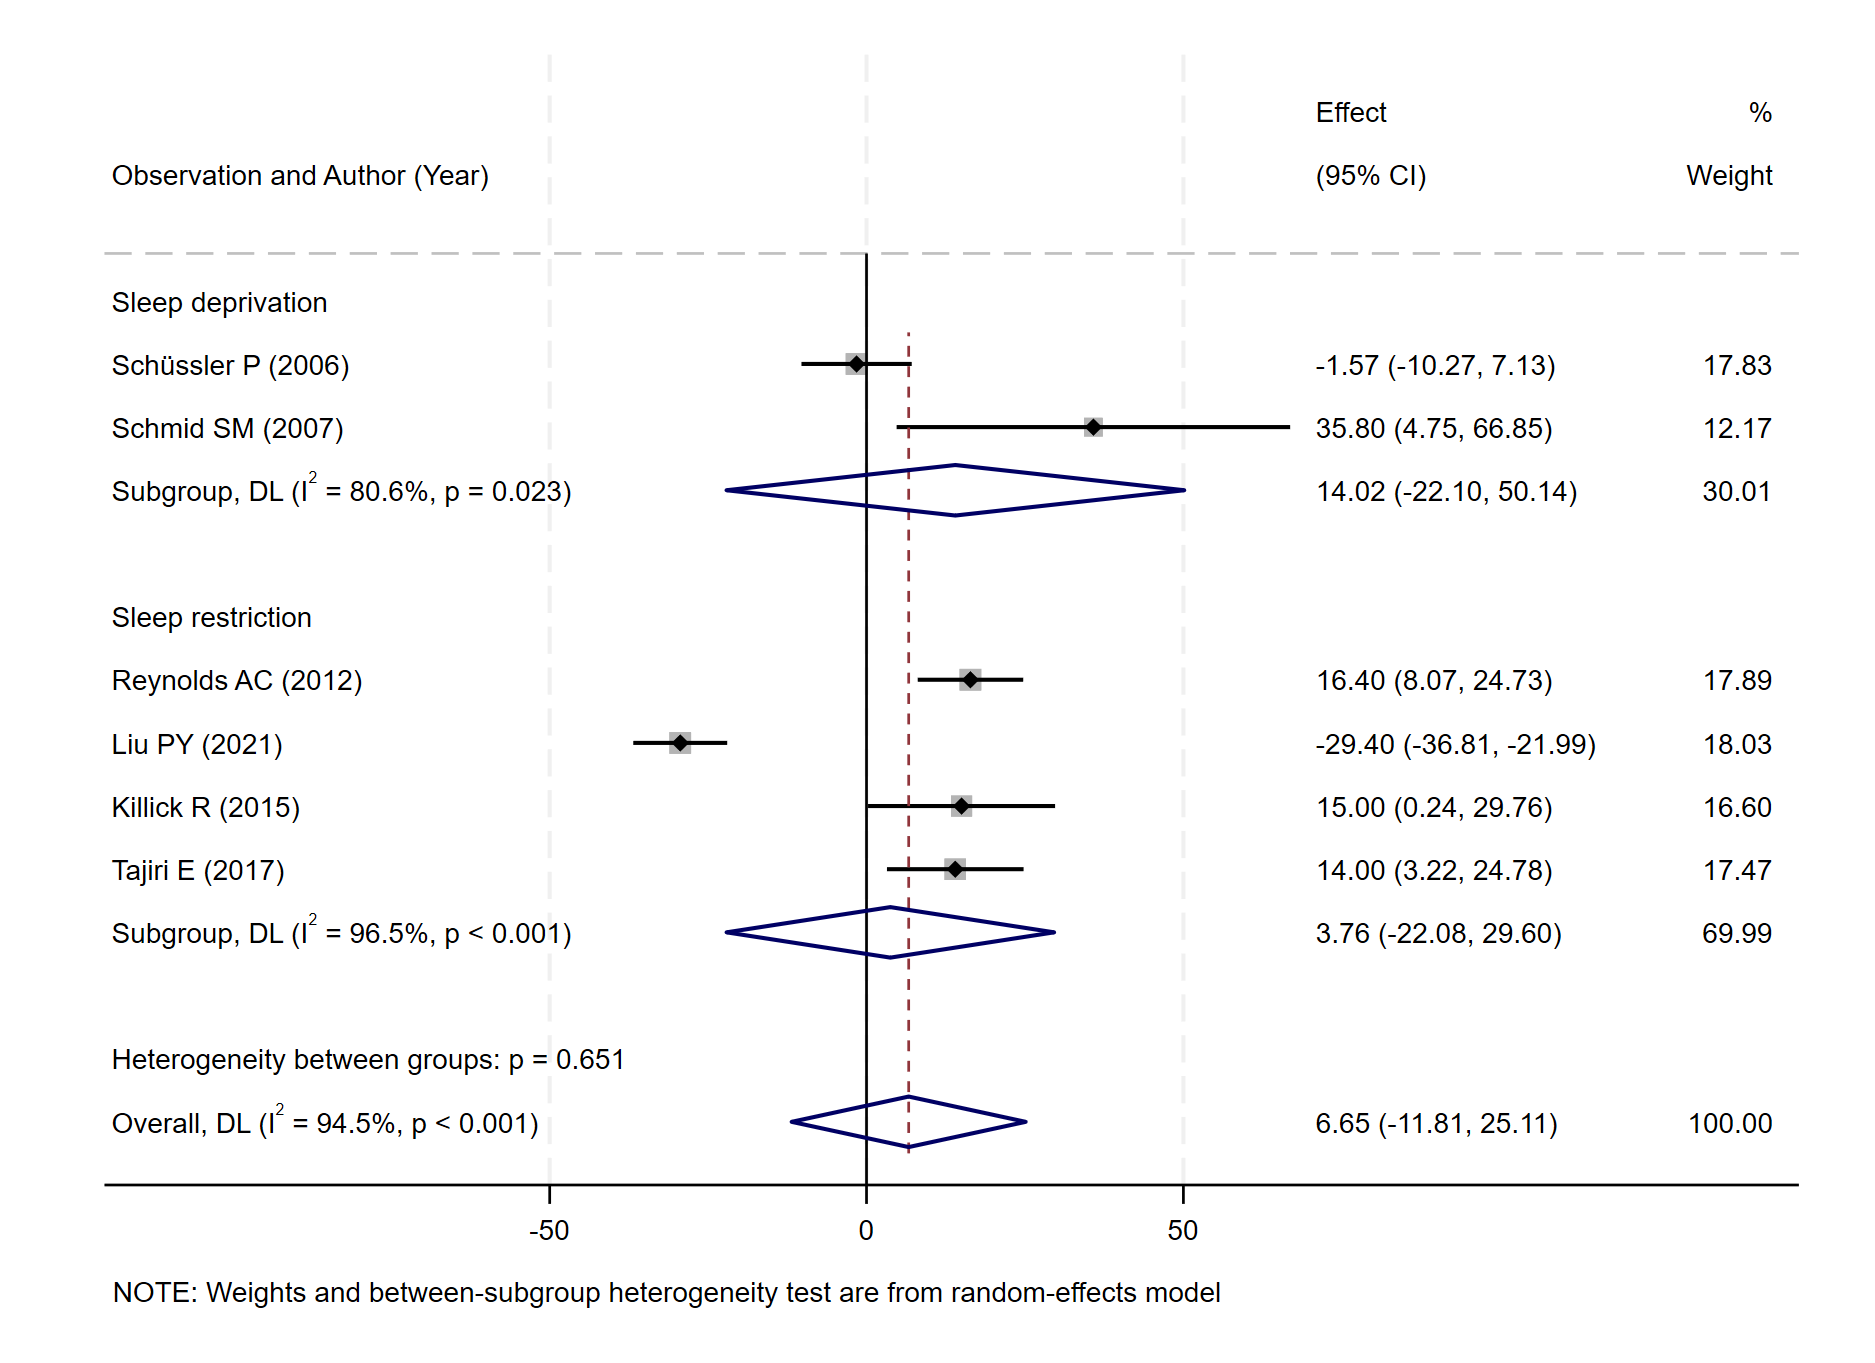


- - 1. By region, random effects model


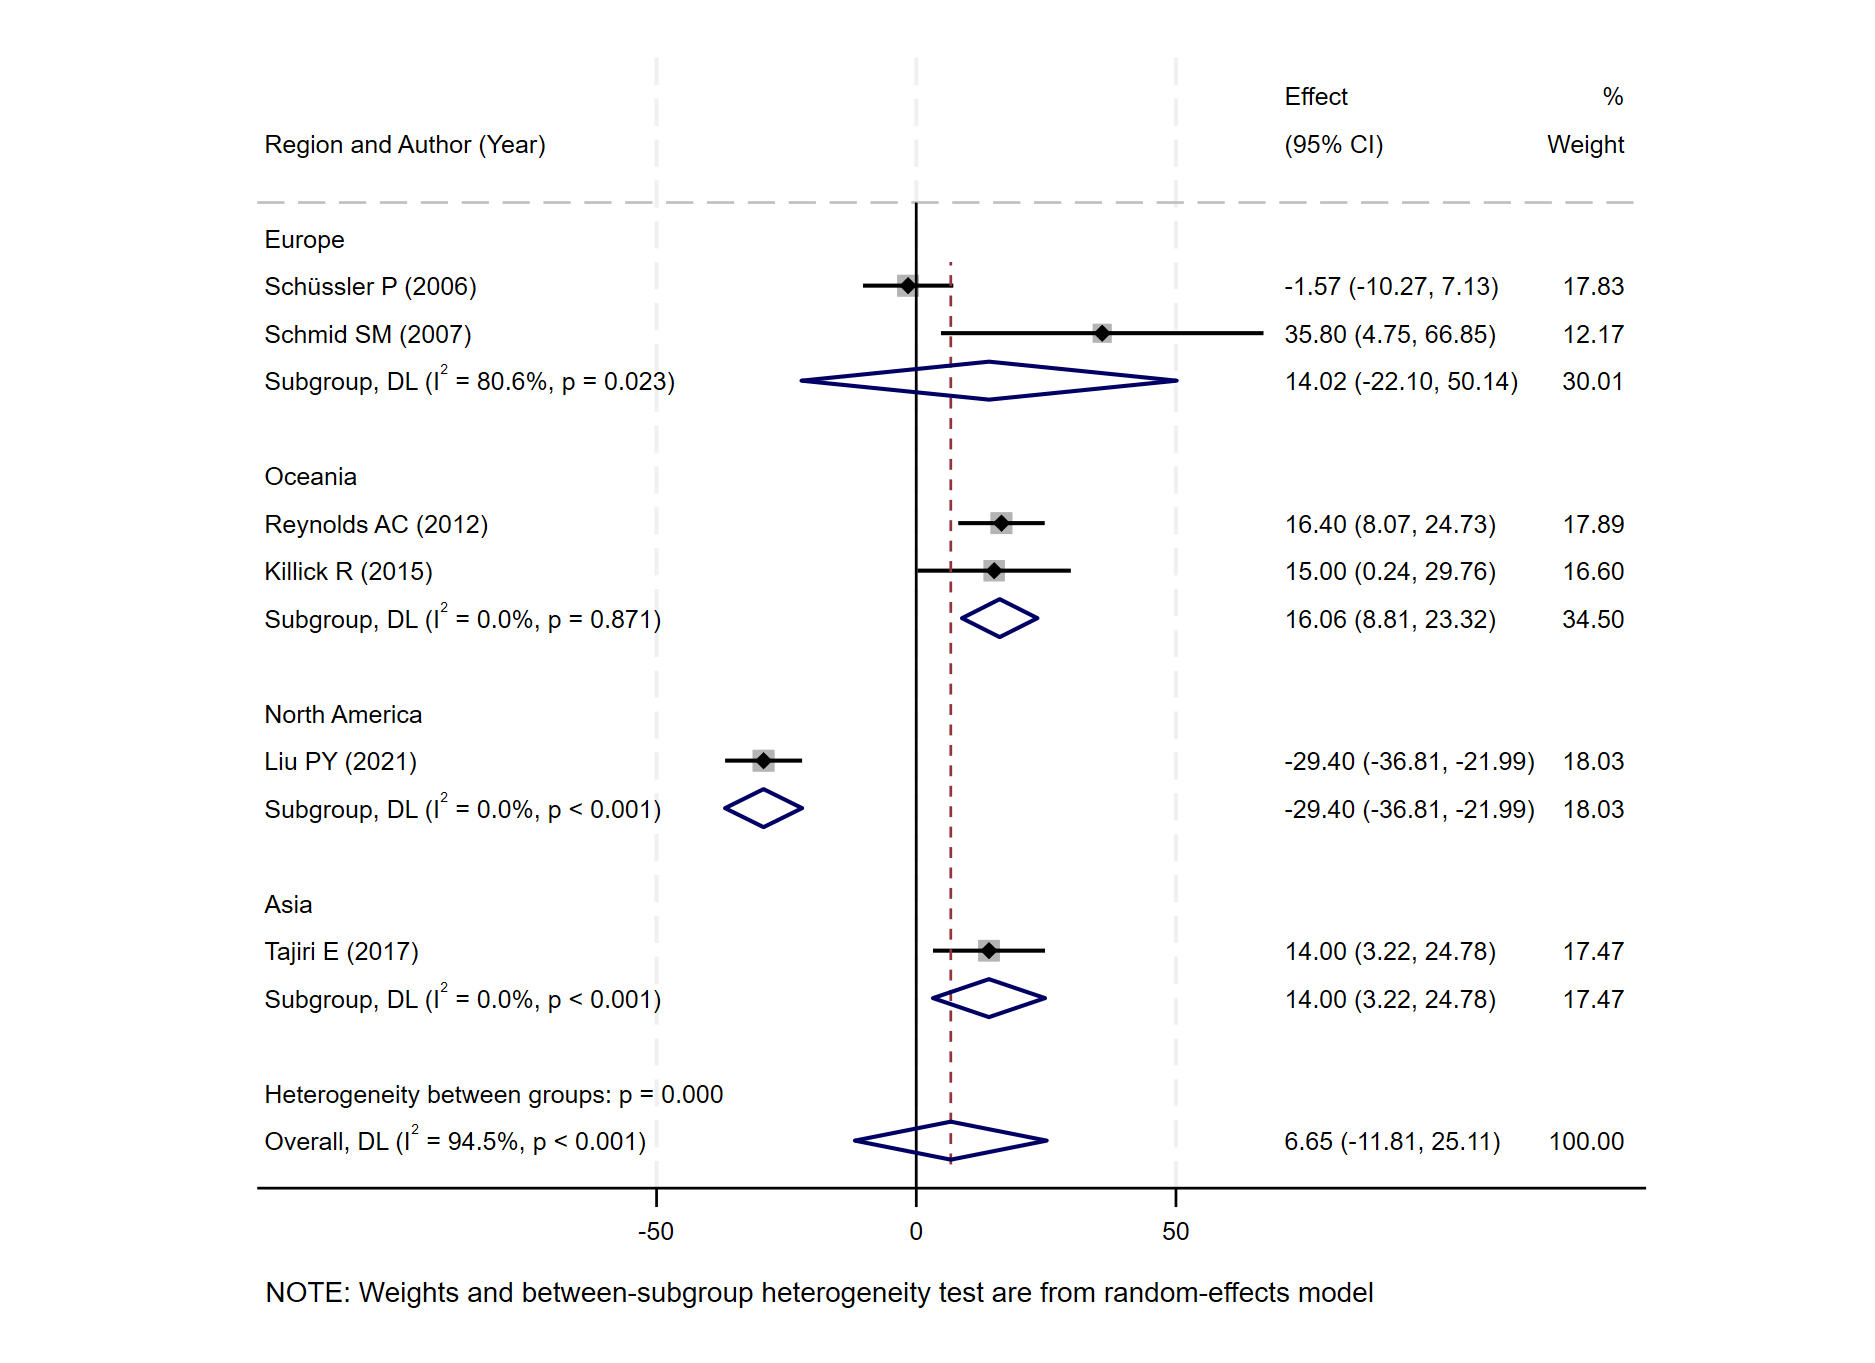


- - 1. By gender ratio (N(male)/N(female) > 1.5 = 1, ≤ 1.5 = 0), random effects model


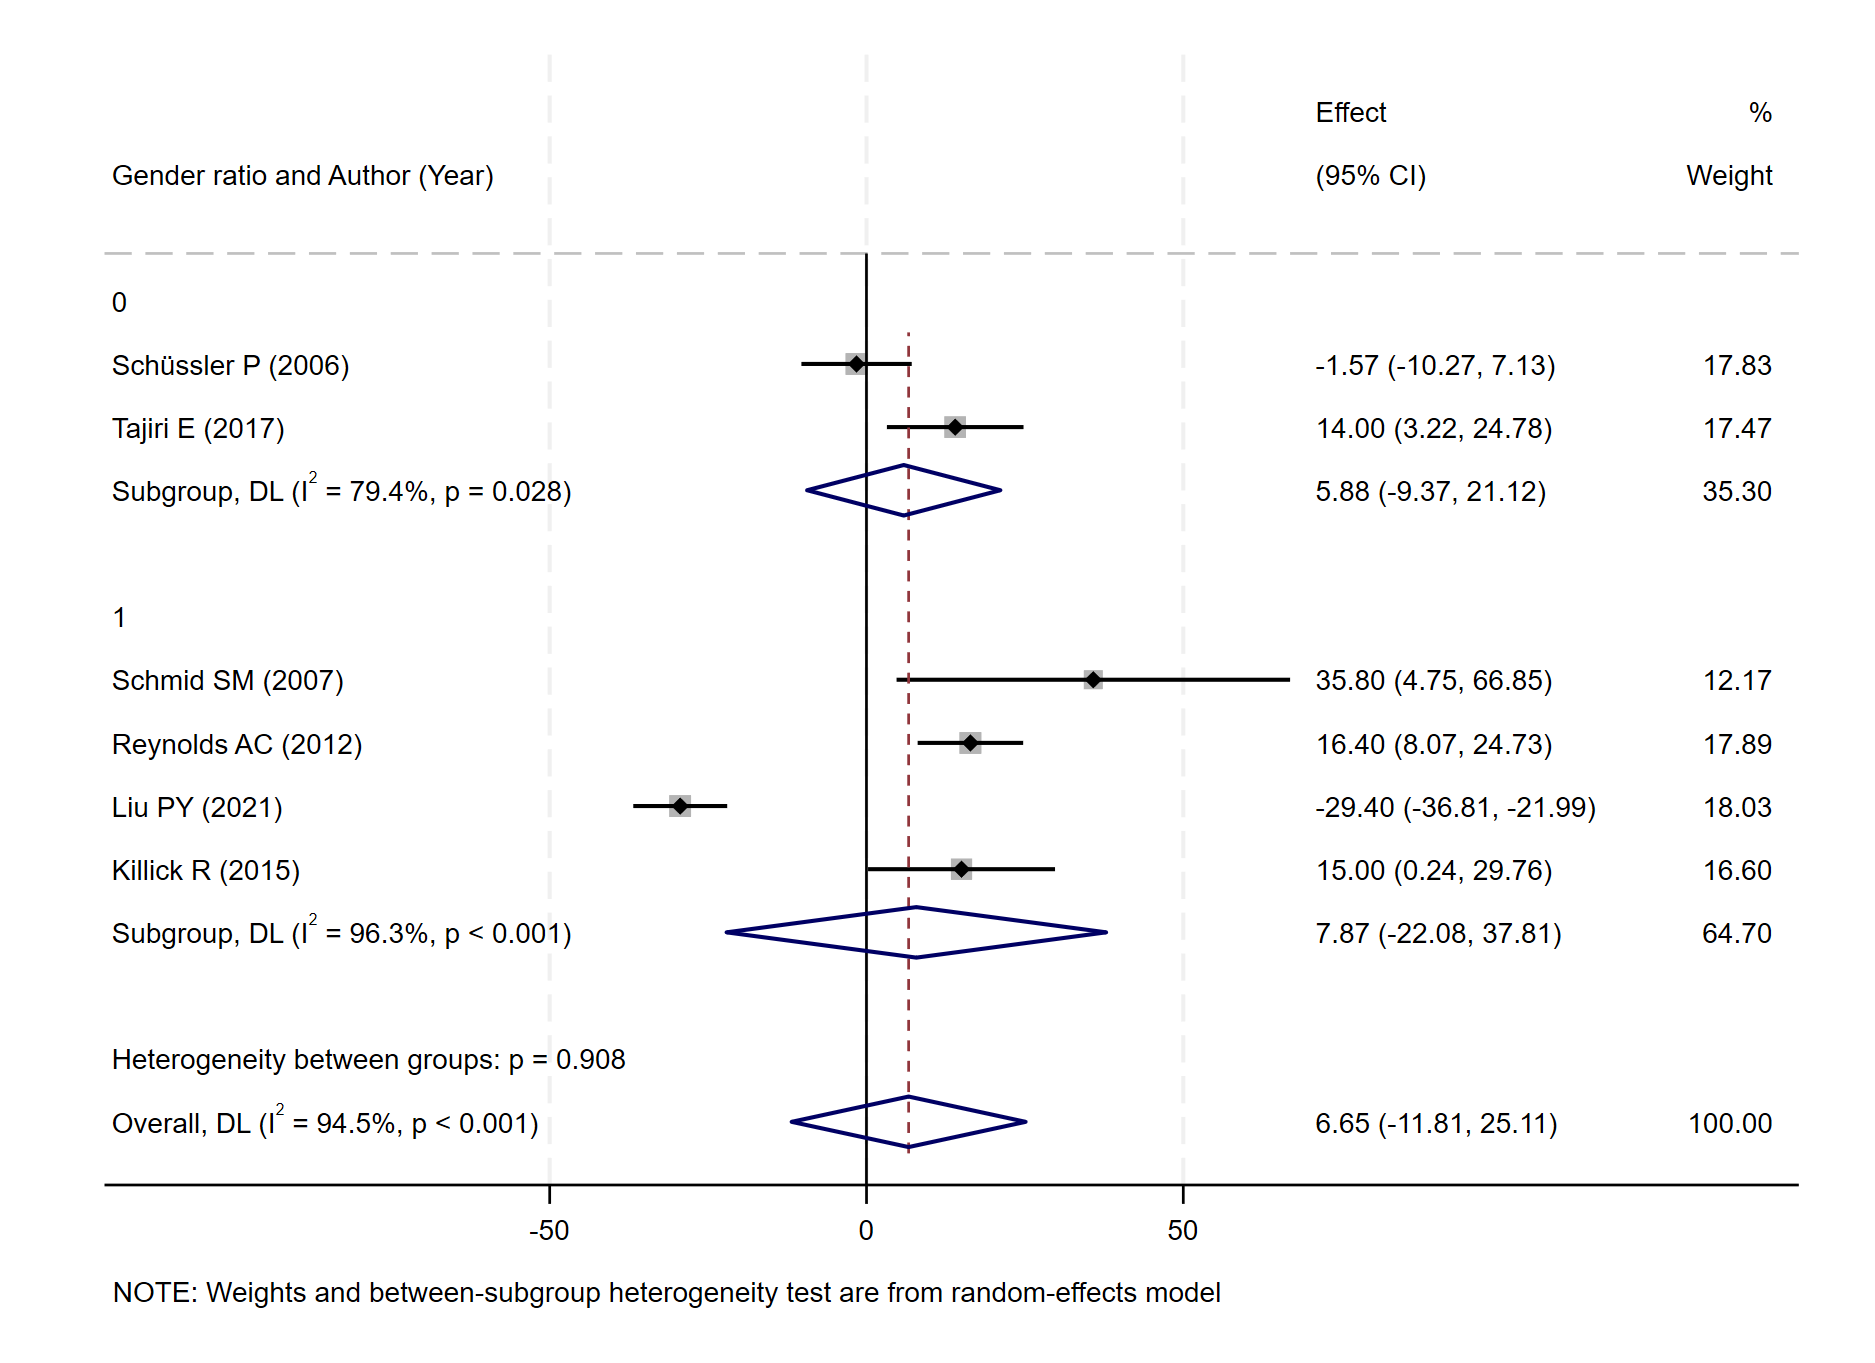


- - 1. By age range (mean value ≤ 30 = 0, mean > 30 = 1), random effects model


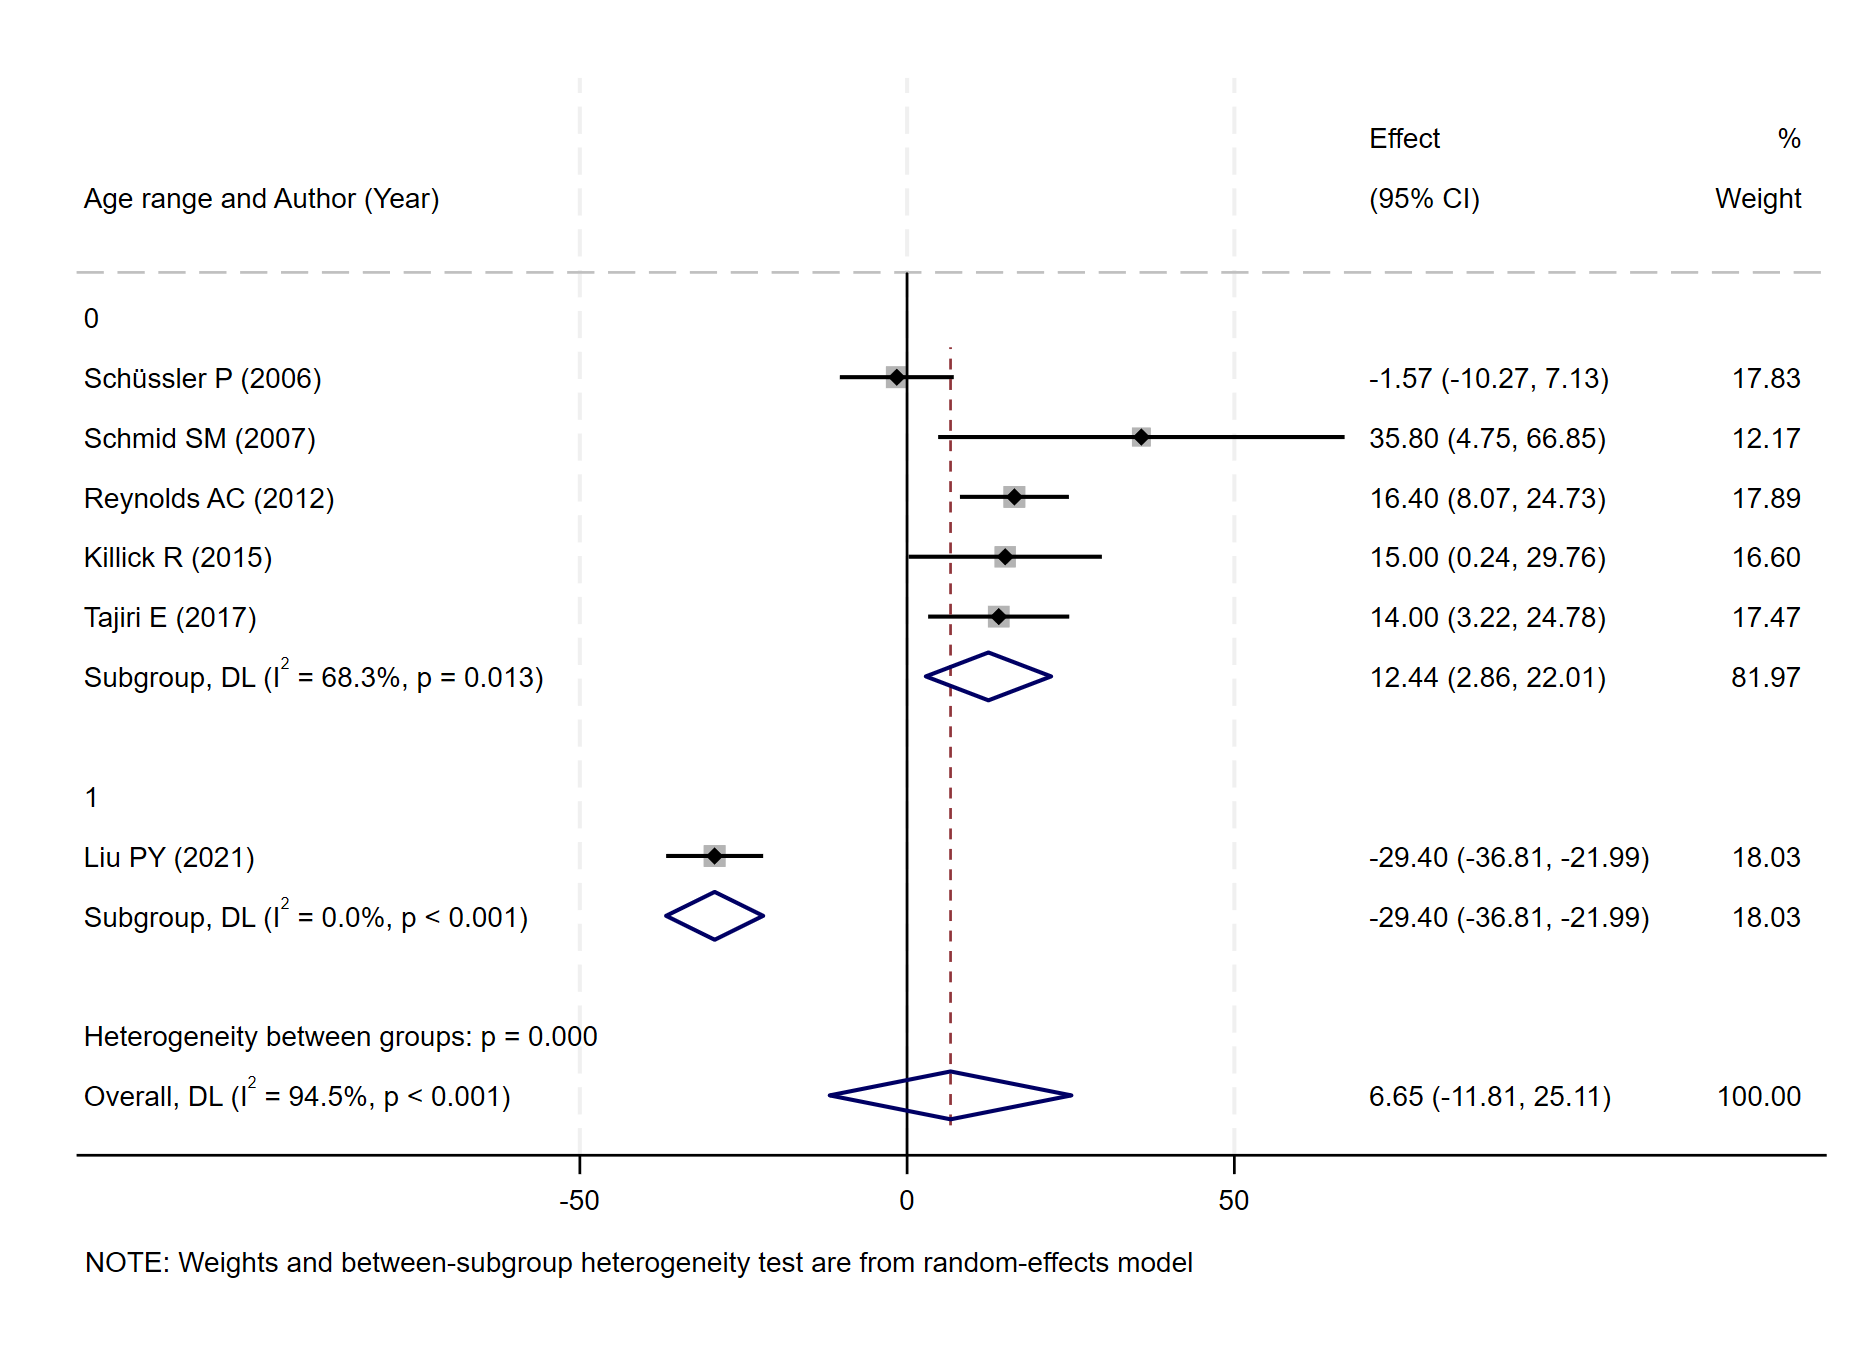


- 1. 24h average cortisol
     1. By region, fixed effects model


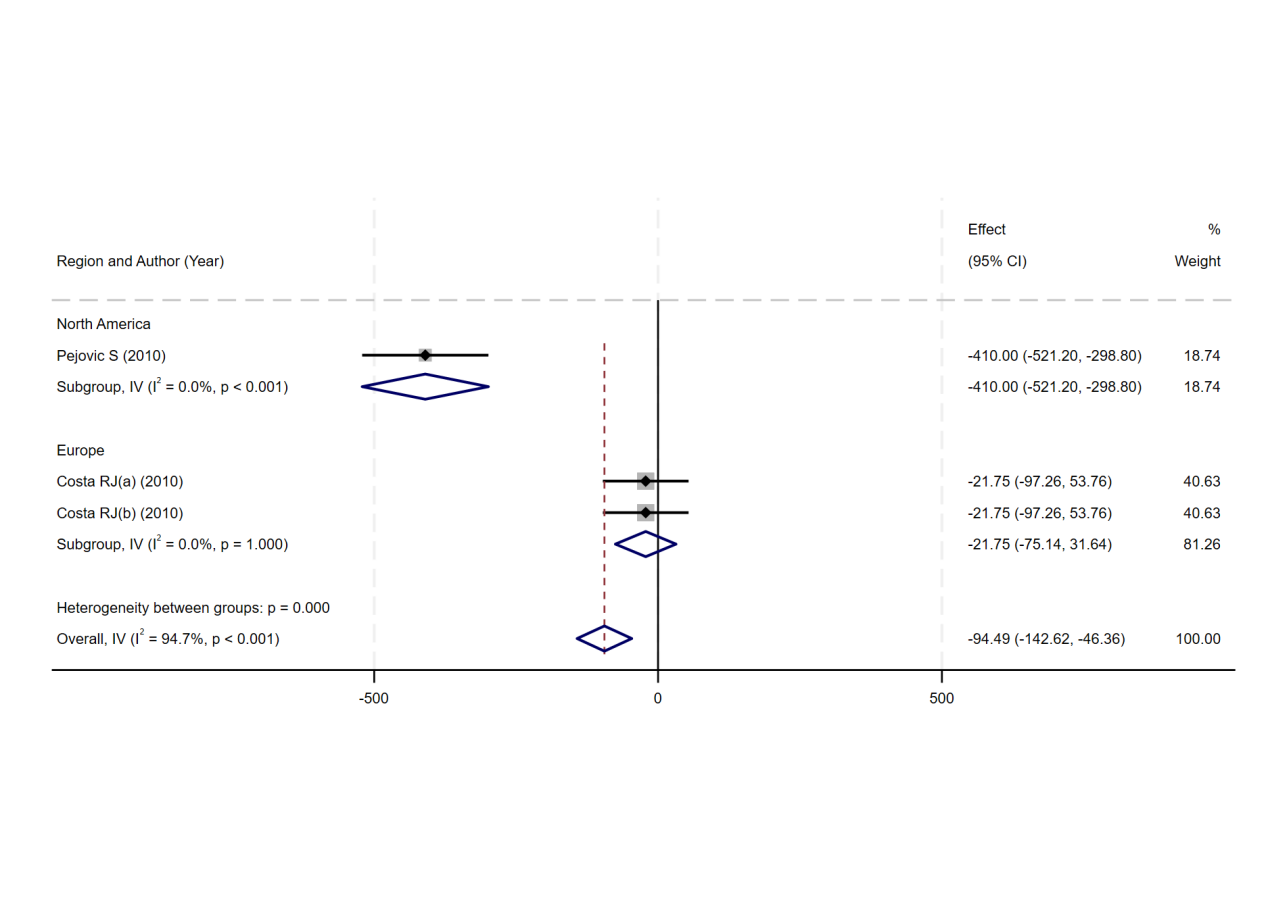


- - 1. By gender ratio (N(male)/N(female) > 1.5 = 1, ≤ 1.5 = 0), fixed effects model


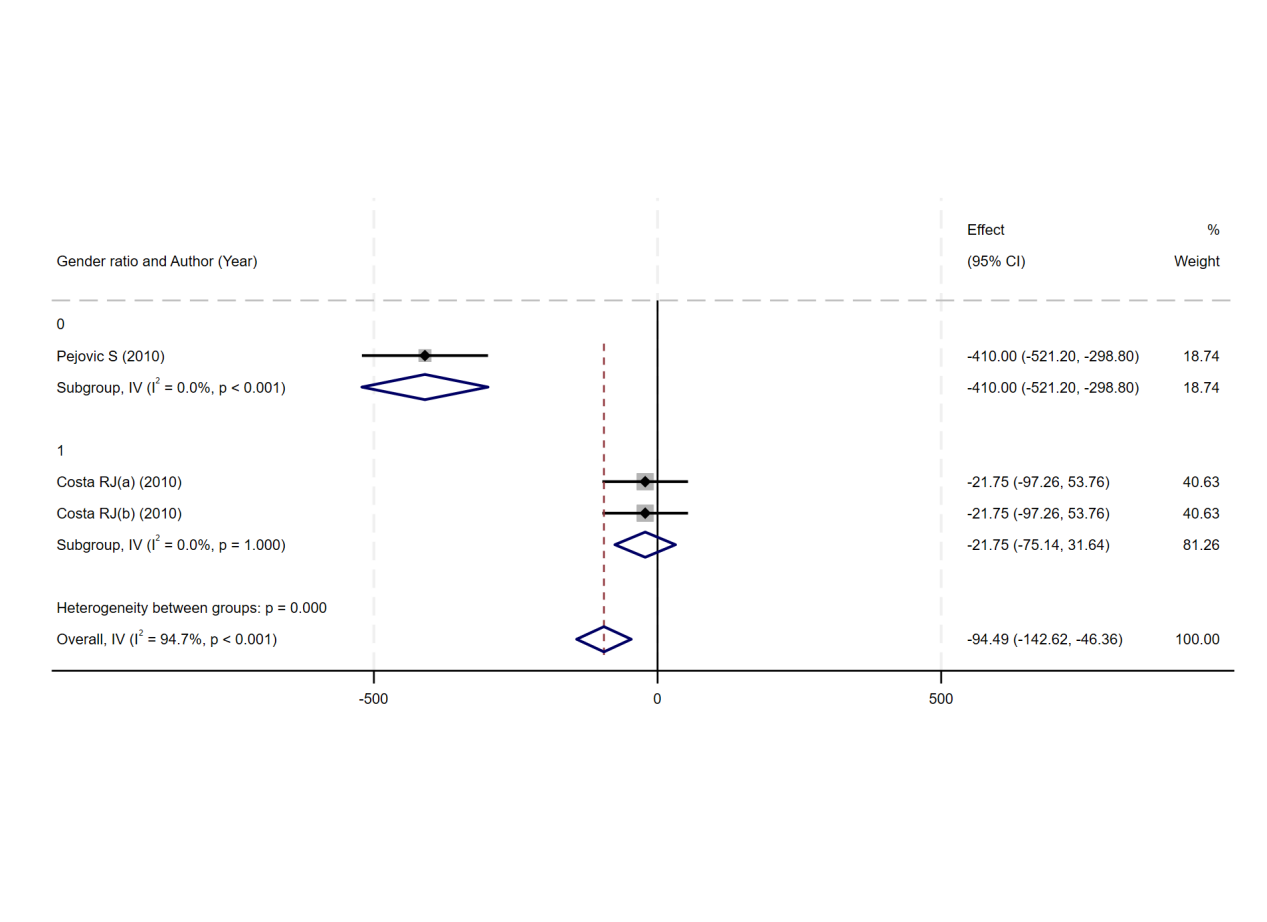

Supplement: Supplementary file 5 [file 8fbe6445b5f10978a33ce8be.doc]
