# Supplementary material
Source: Research Square preprint supplement (doi:10.21203/rs.3.rs-9056648/v1)

**Supplementary Appendix 3**

**Additional Figures and legends of General Analyses**

Abbreviations: TC: total cholesterol; HDL: high density lipoprotein cholesterol; LDL: low density lipoprotein cholesterol; TG: total triglyceride; HbA1c: hemoglobin A1c; BMI: body mass index; CI: credible interval.

**Legends (universal)**

Network maps: Mean difference and 95% CI of every individual intervention compared with every other are presented in this figure. The network maps present all interventions with direct comparisons. Size of the blue dots is in accord with the number of participants, and the width of the black line refers to the number of direct comparisons.

Funnel plots: The funnel plots display the effect estimate on the x-axis against a measure of its precision, that is, the standard error, on the inverted y-axis. Under the null of no bias the cloud should resemble a symmetric inverted funnel, whereas visible asymmetry - missing corners, a skewed tail, or a hollow base - suggests small-study effects such as, and especially, publication bias. Formal tests such as Egger’s test which was used in this combined meta-analysis, can quantify the degree of this departure from symmetry, thus helping judge the robustness of the pooled meta-analytic estimate.

SUCRA graphs: The SUCRA graph shows the probability that each intervention is the best option in a network meta-analysis. The SUCRA plot translates the result of a network-meta-analysis (value presented in league tables) into a single 0-1 curve for each intervention. The higher the surface under its curve, the greater the probability that the treatment is the best, second-best, etc., among all competing options, thereby ranking every therapy simultaneously while accounting for the uncertainty in the evidence.

League tables: The league tables present all head-to-head results of the network meta-analysis, in which some comparisons were highlighted. In the lower triangles, comparisons with statistical significance were marked blue. Comparisons of no significance with a positive mean were marked orange, and those with a negative mean were marked green. In the upper triangles, direct comparisons were marked red, of which pairs with statistical significance were marked yellow.

Forest plots: The forest plots present mean value, 95% CI, and weight for each included study, while the pooled effect size and heterogeneity (I2) were also generated. Size of the black diamonds is proportional to the observed effect size, the gray squares represent weight of the trial, and the black lines show the 95% CI. The dark blue hollow diamonds at the bottom of each subgroup represent the polled effect. In this combined meta-analysis, both random effects model and fixed effects model were applied for each analyzing group and sub-group, while only results based on random effects model were presented in forest plots.

NOTE: Only results using random effects model (Doz-Lewbel method, in details, using the inter-group variance matrix of leave-one-out to set the GLS weights, treating "individual heterogeneity" as a random effect, and allowing the treatment and individual intercepts to be correlated, this approach solves the endogeneity problem of traditional RE) were presented in forest plots. Results using fixed effects model (Instrumental-Variable method, in details, perform the within transformation on the panel data to remove individual means and then use an exogenous instrumental variable to conduct 2SLS on the transformed endogenous variable) were also conducted, the results of which have been presented in table performs in Supplementary Appendix 4.

1. Case-control designed studies
   1. Weight
      1. Network map


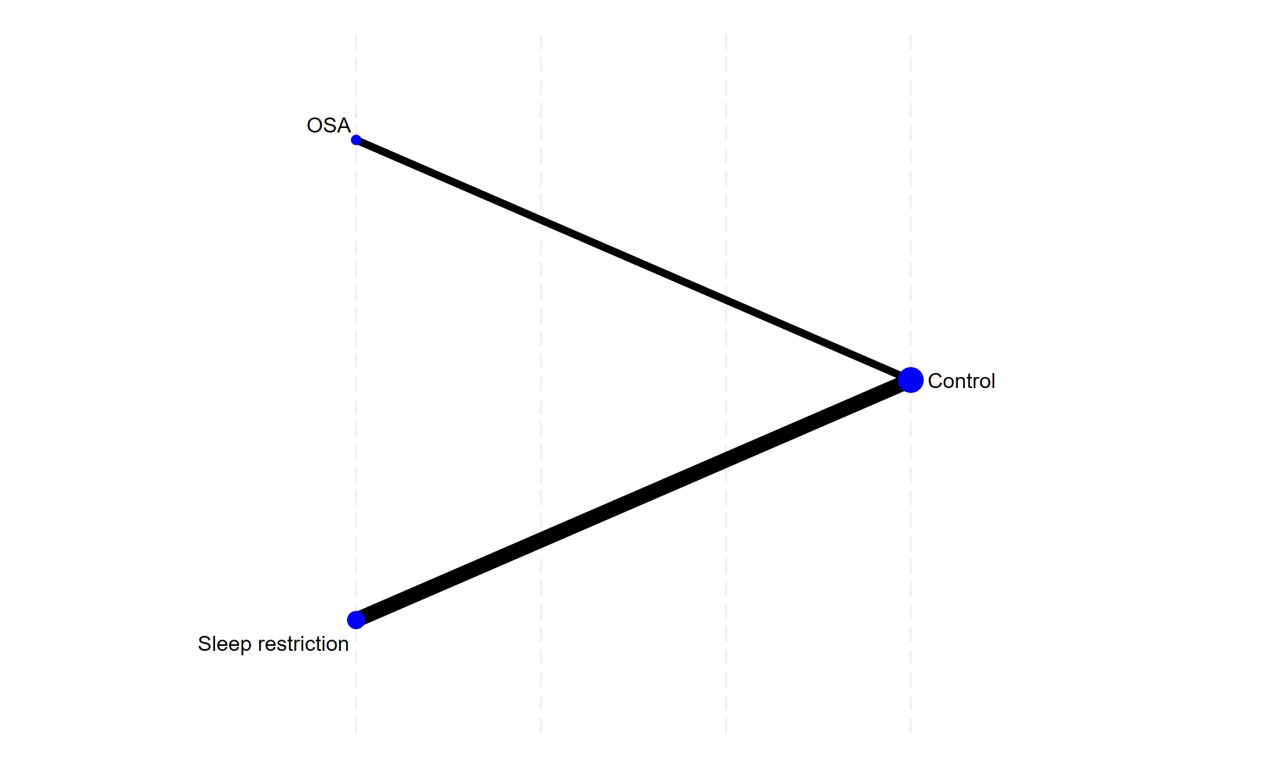


- - 1. Funnel plot


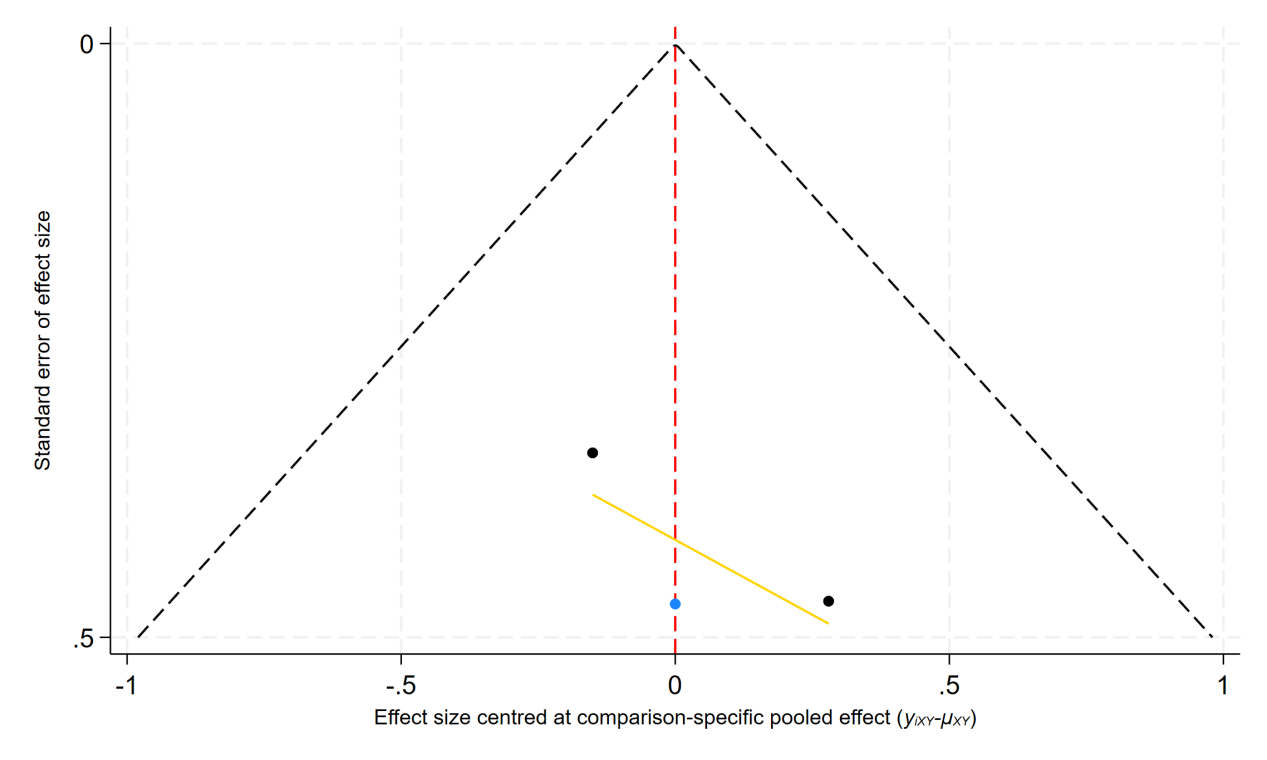


- - 1. SUCRA graph


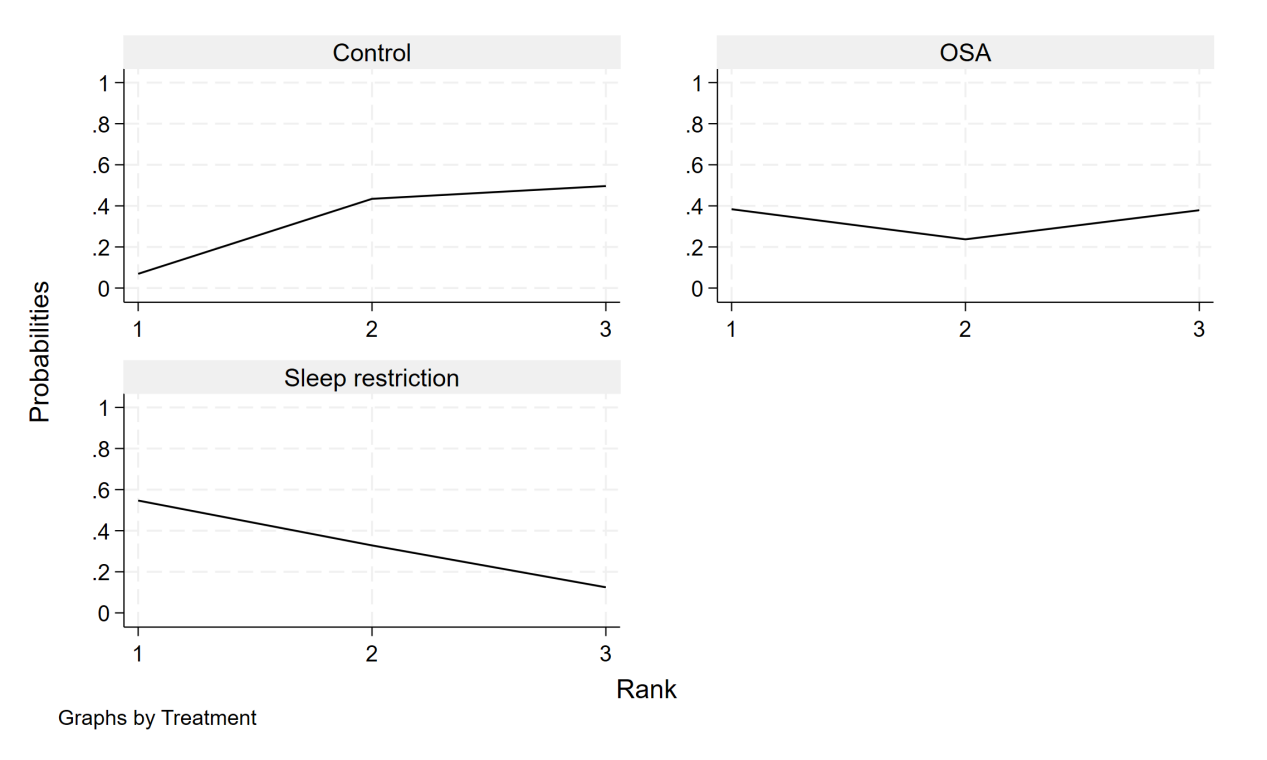


- - 1. League table


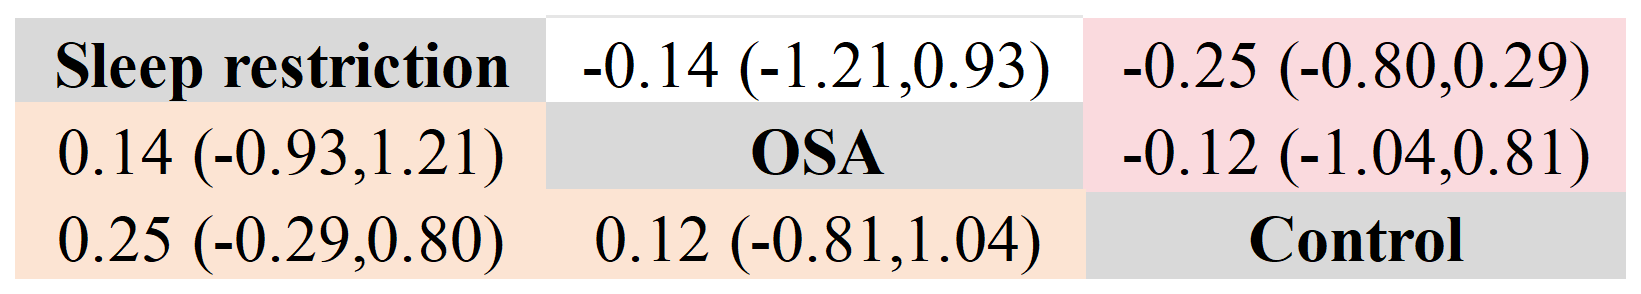


- - 1. Forest plot


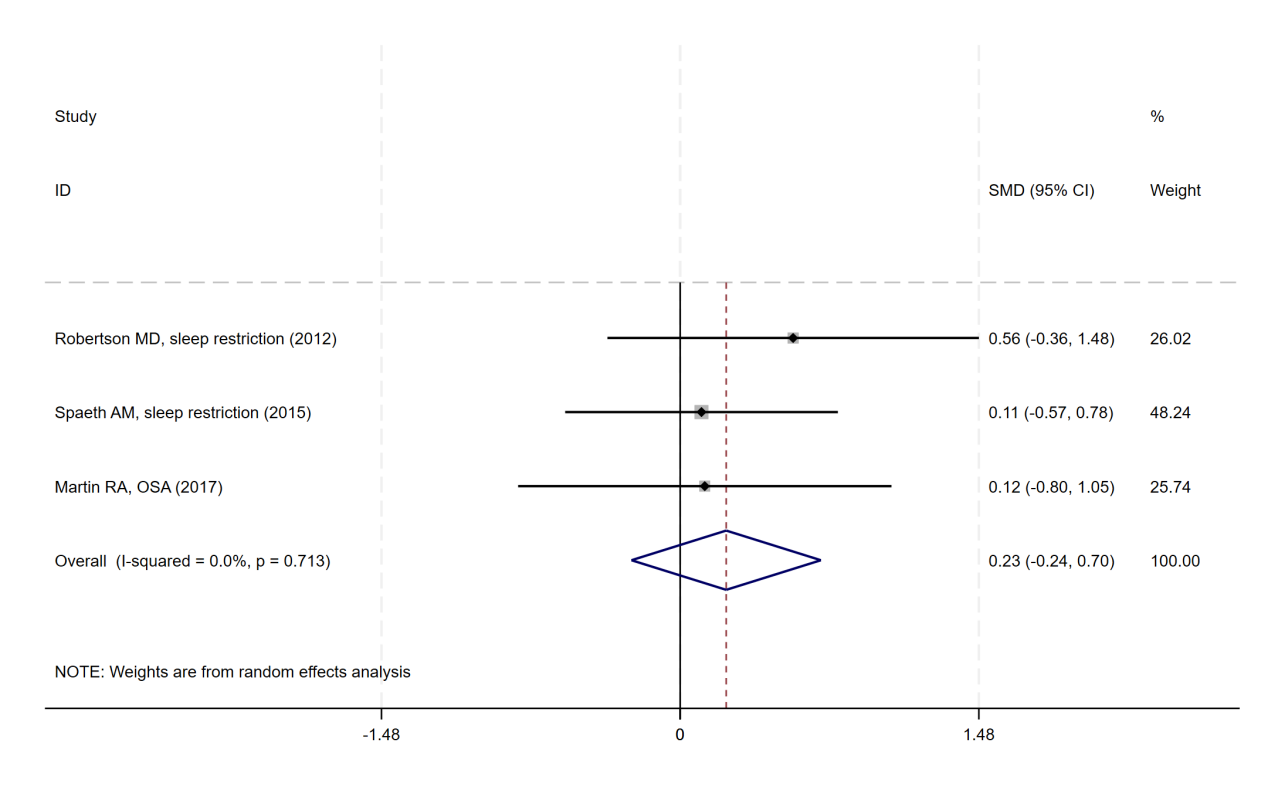


- 1. BMI (after elimination)
     1. Network map


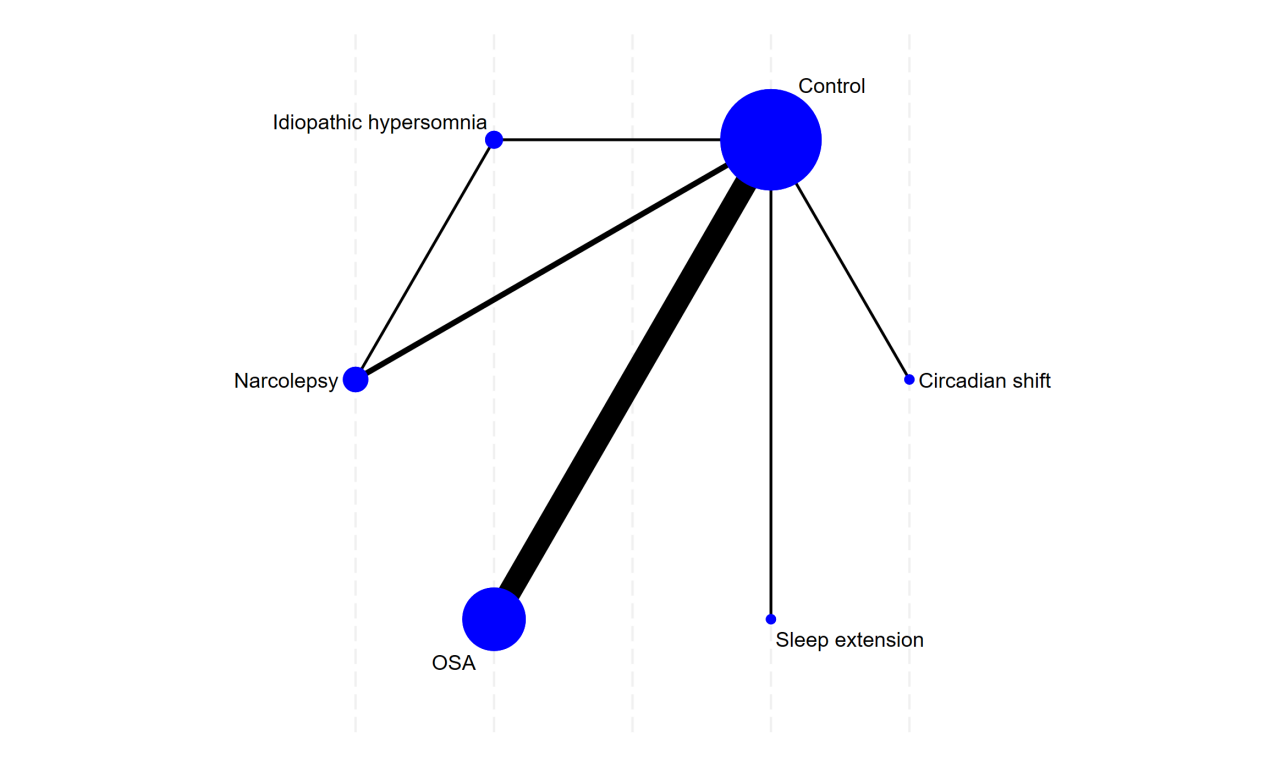


- - 1. Funnel plot


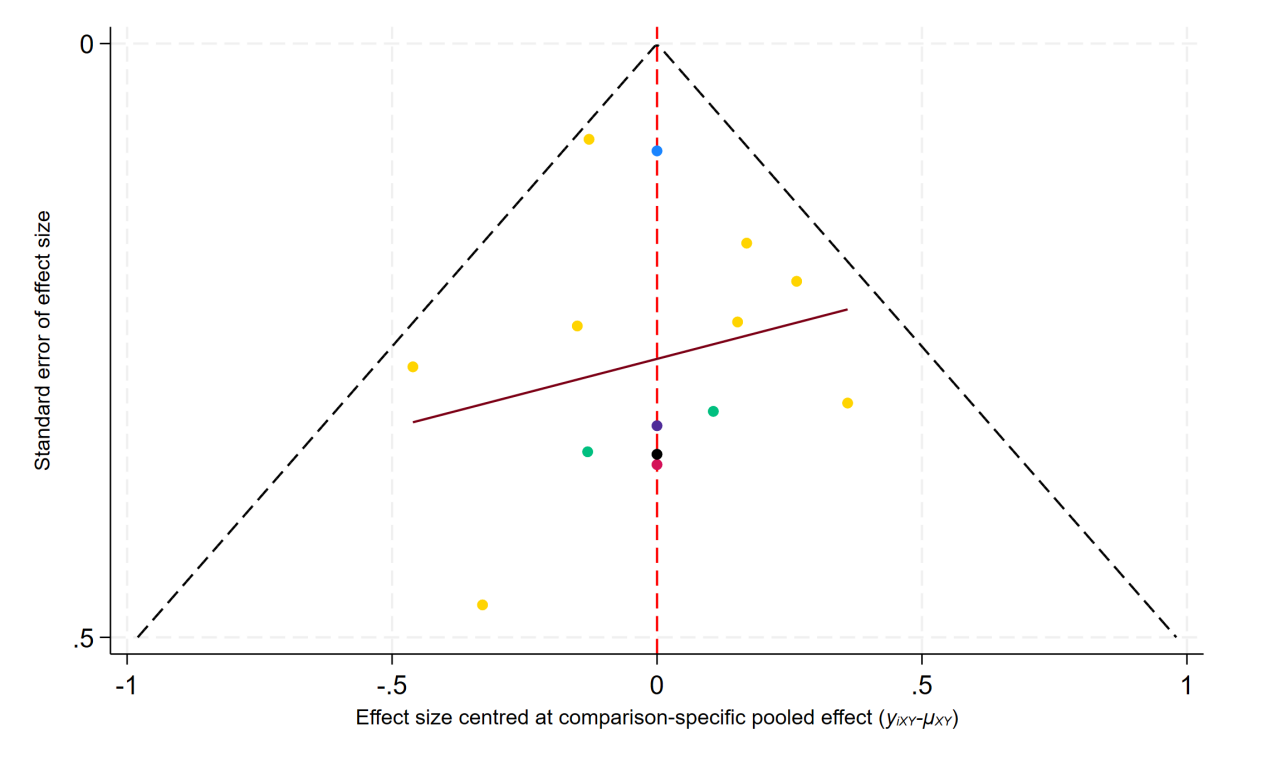


- - 1. SUCRA graph


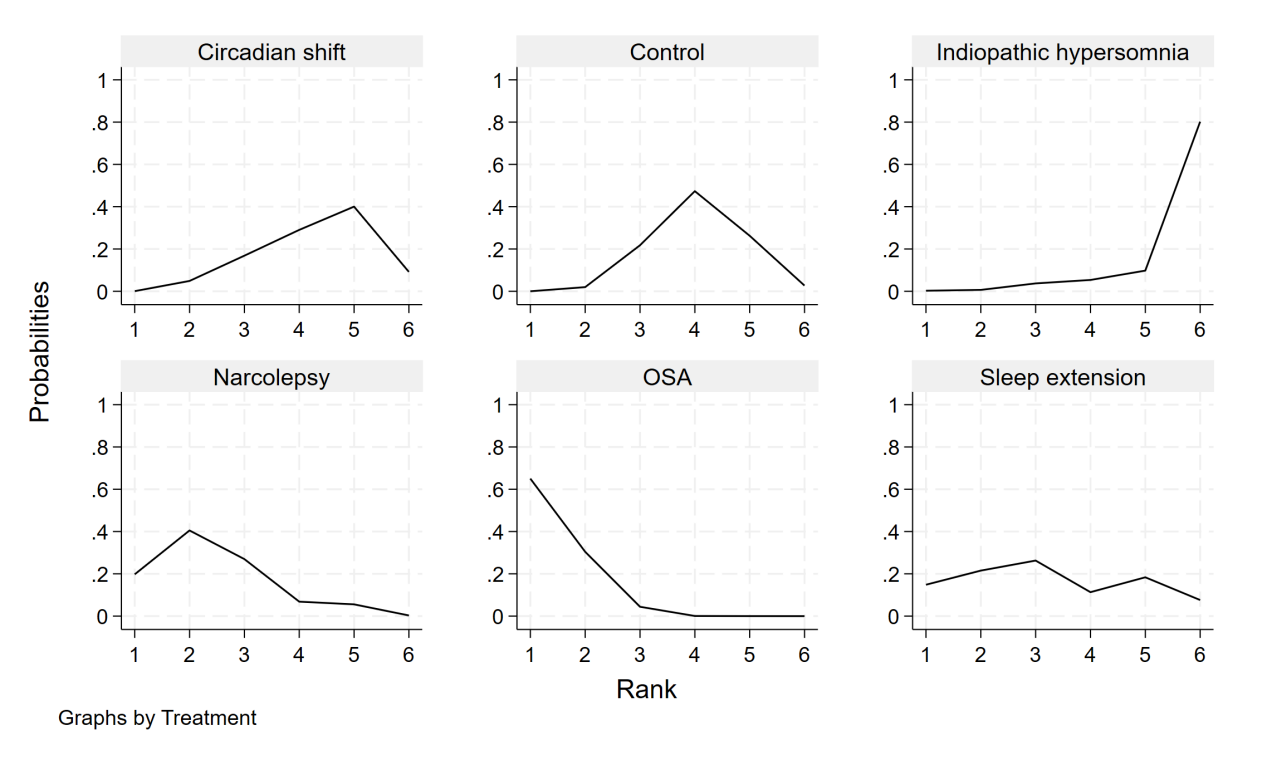


- - 1. League table


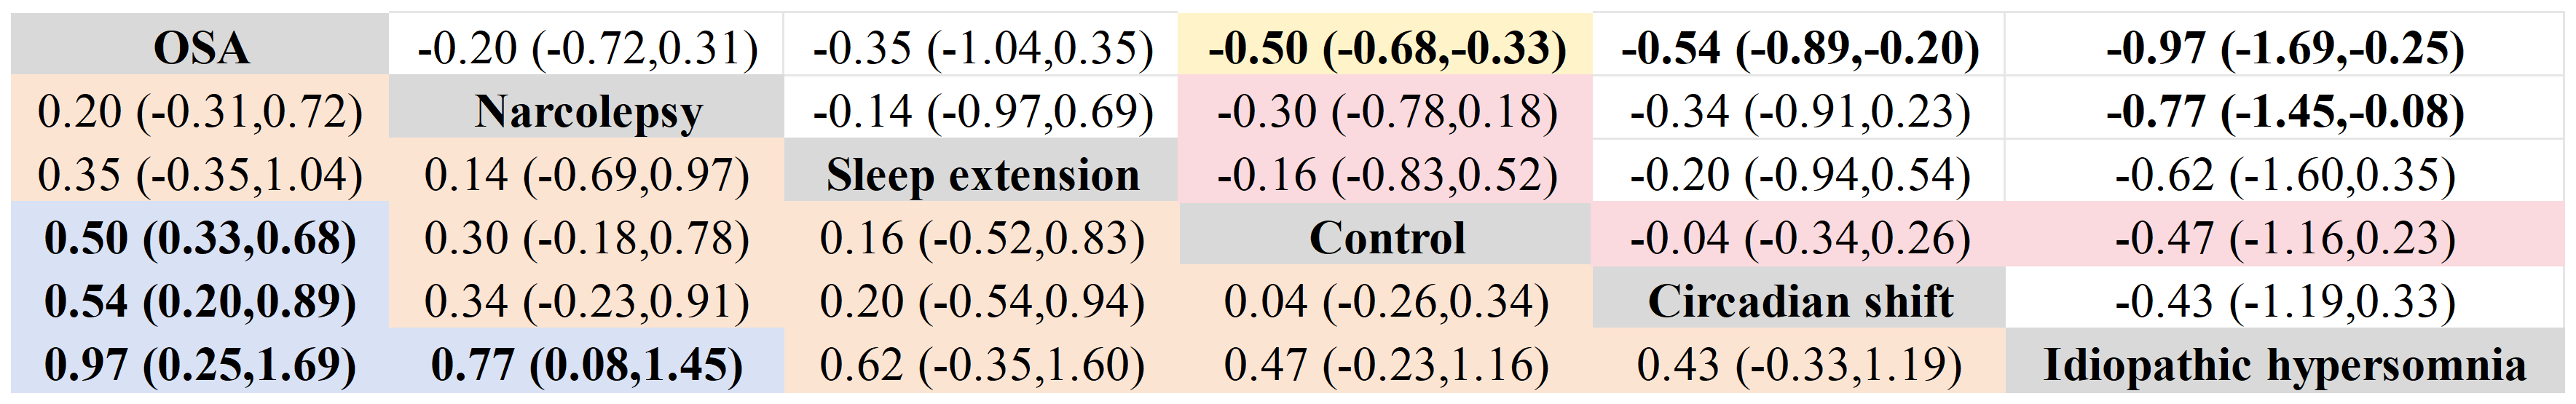


- - 1. Forest plot


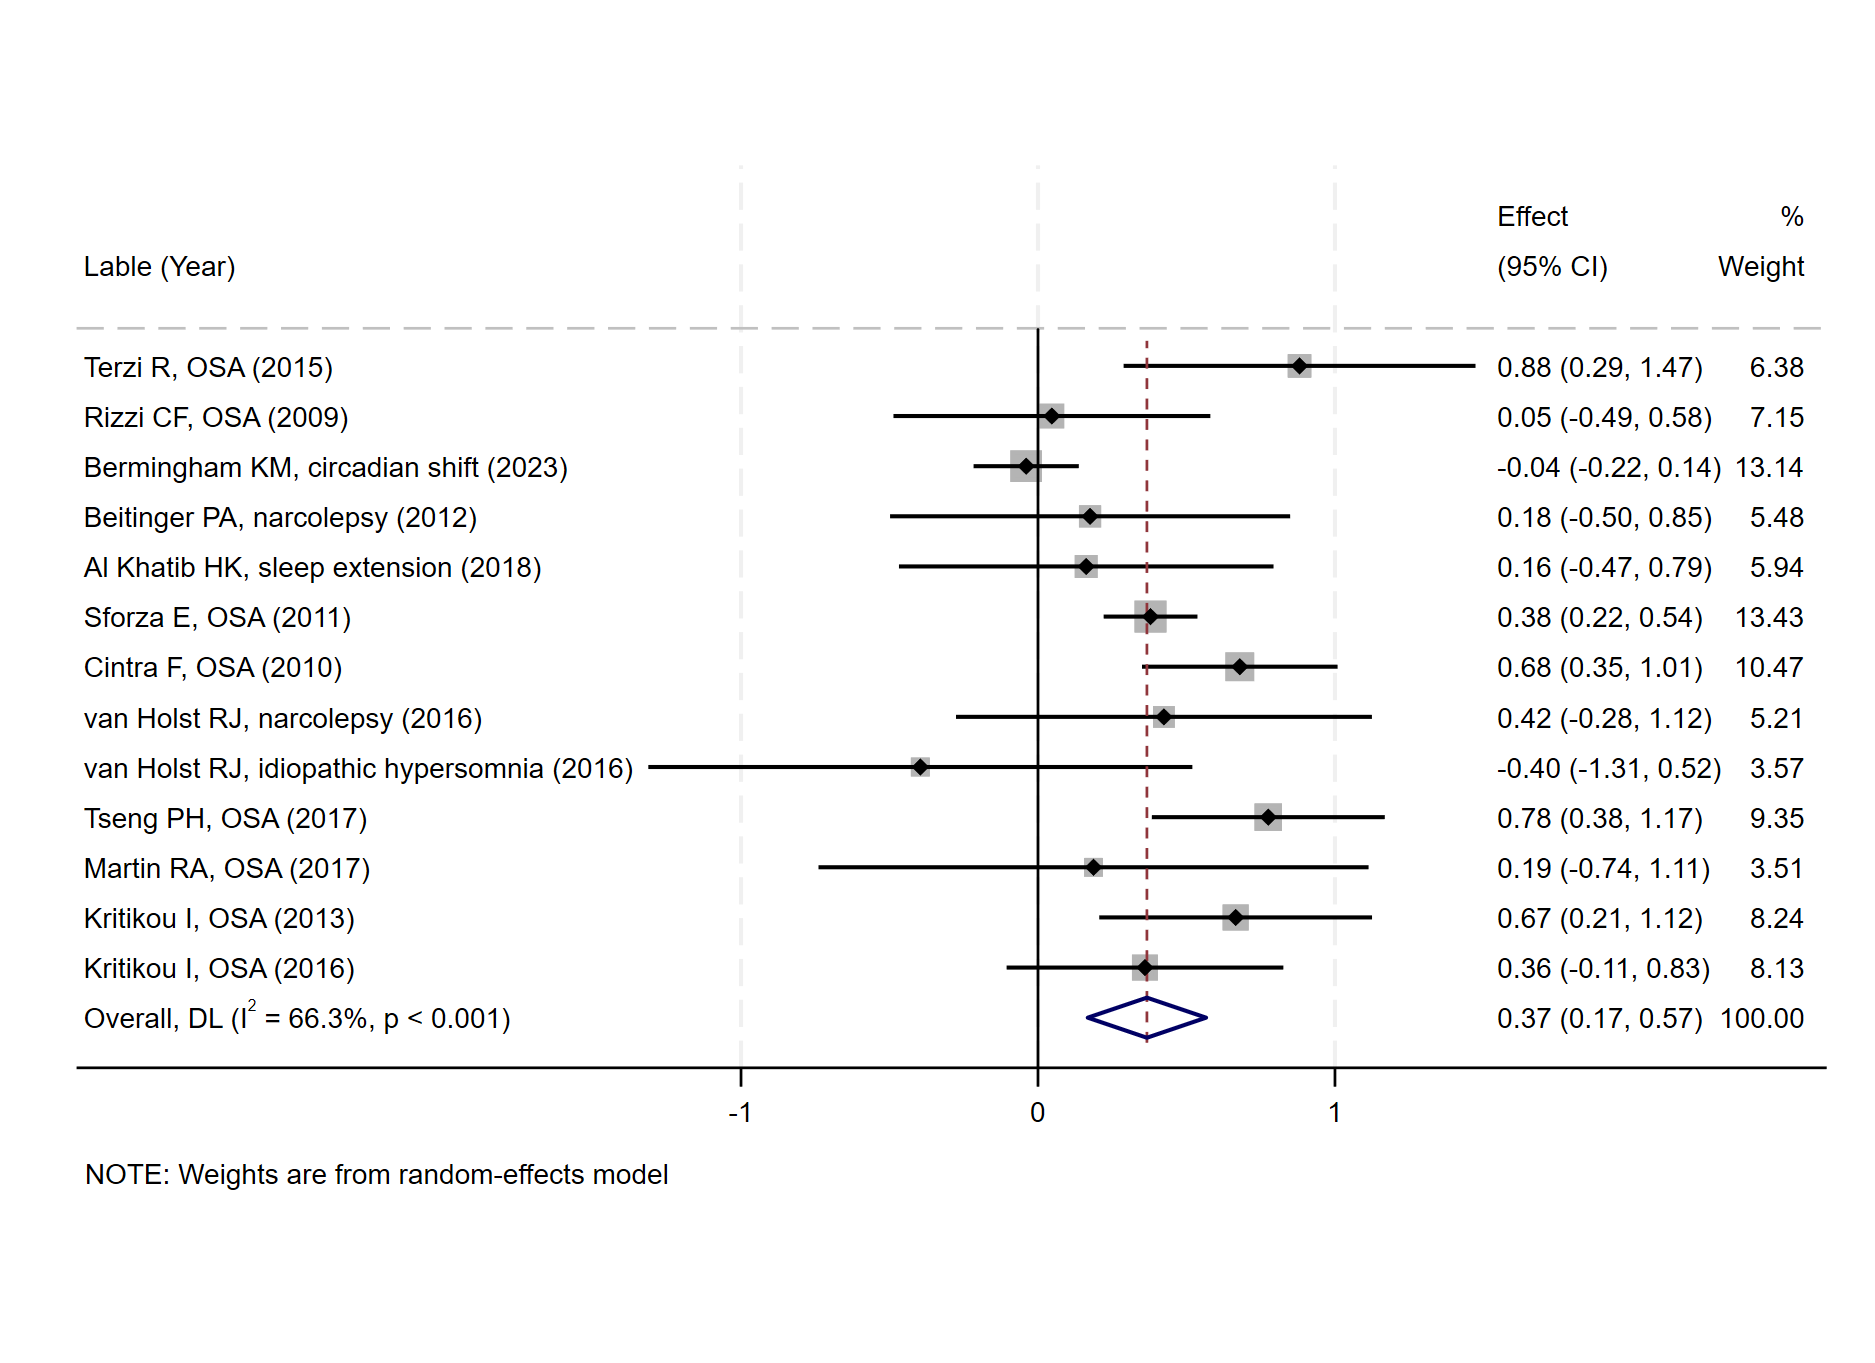


- 1. Waist circumference (Only OSA was included in the sleep disorder type, therefore network meta-analysis is not applicable)
     1. Funnel plot


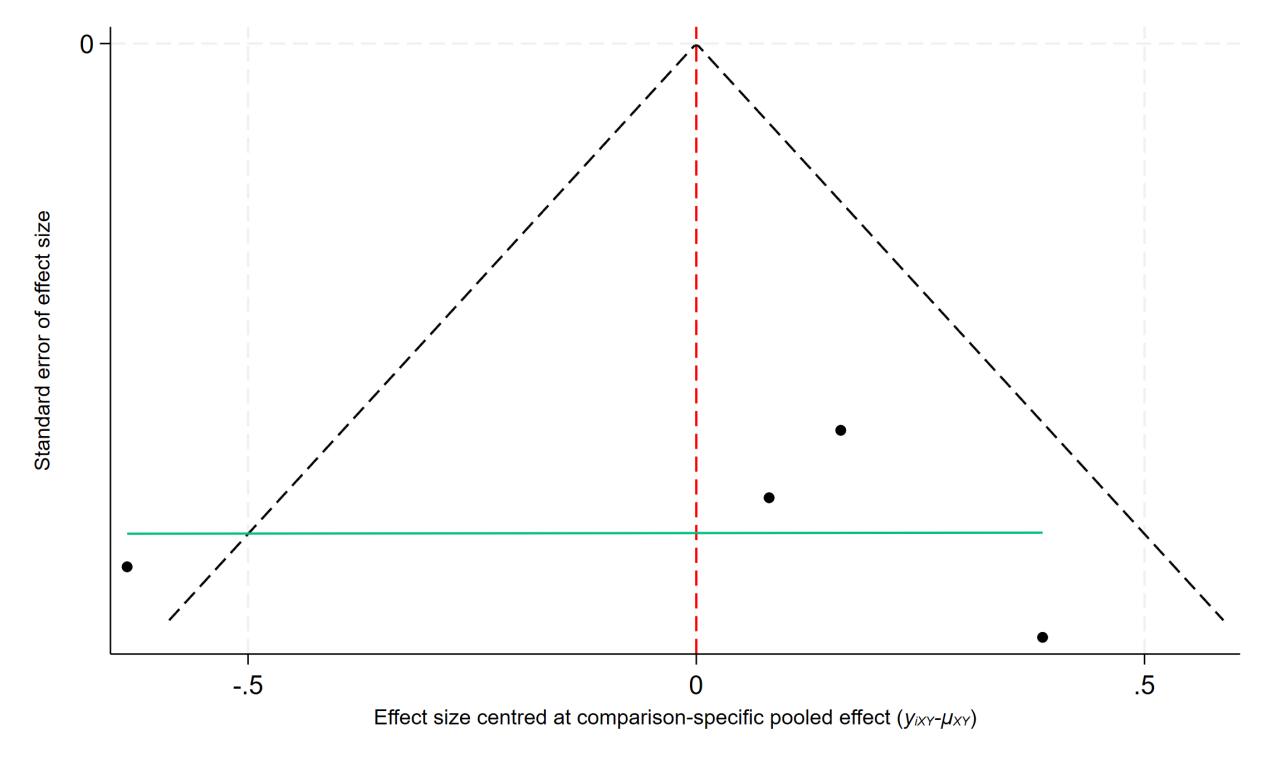


- - 1. Forest plot


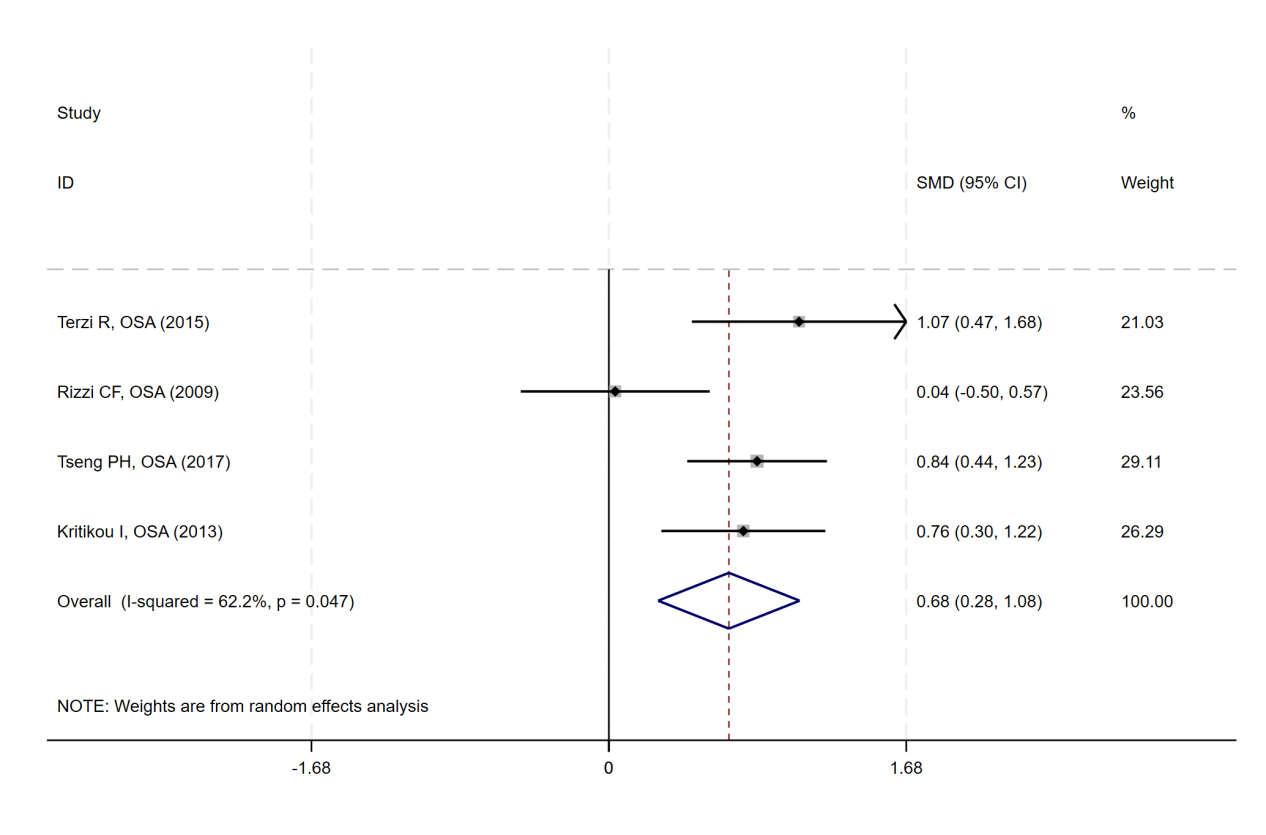


- 1. Neck circumference (Only OSA was included in the sleep disorder type, therefore network meta-analysis is not applicable)
     1. Funnel plot


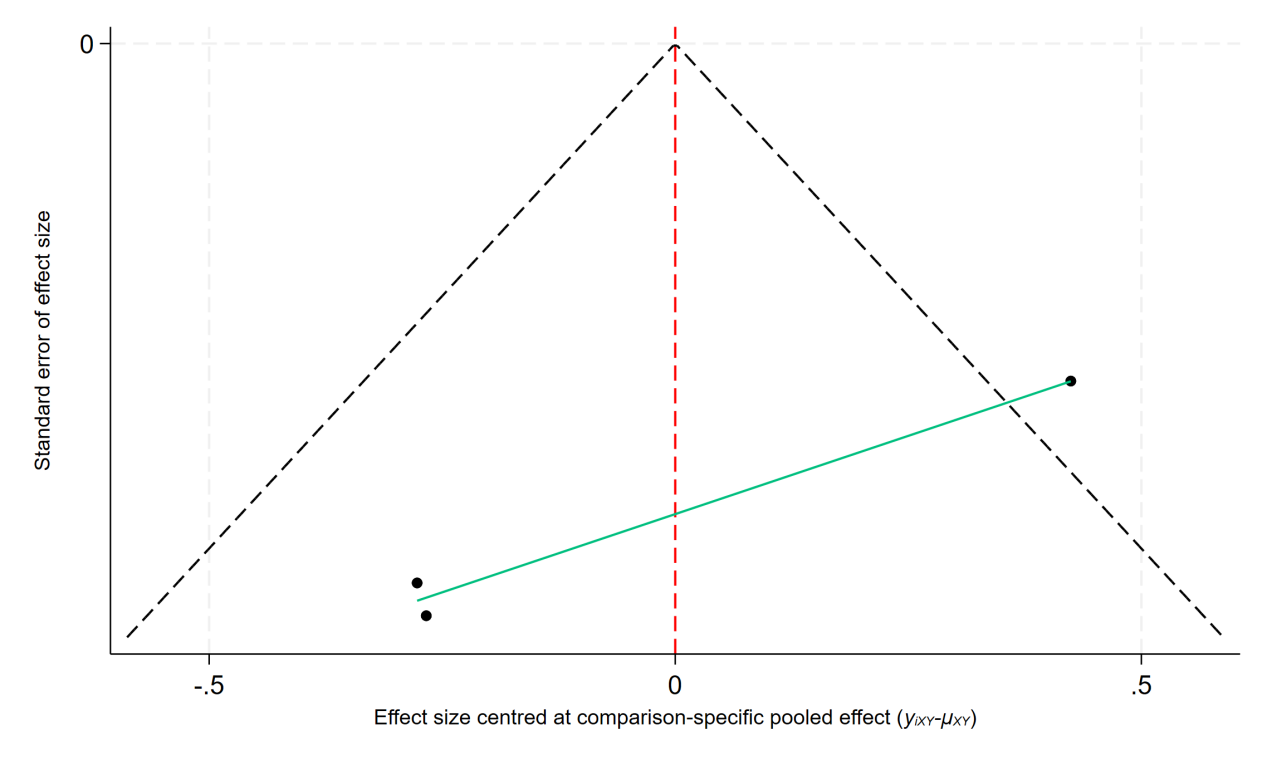


- - 1. Forest plot


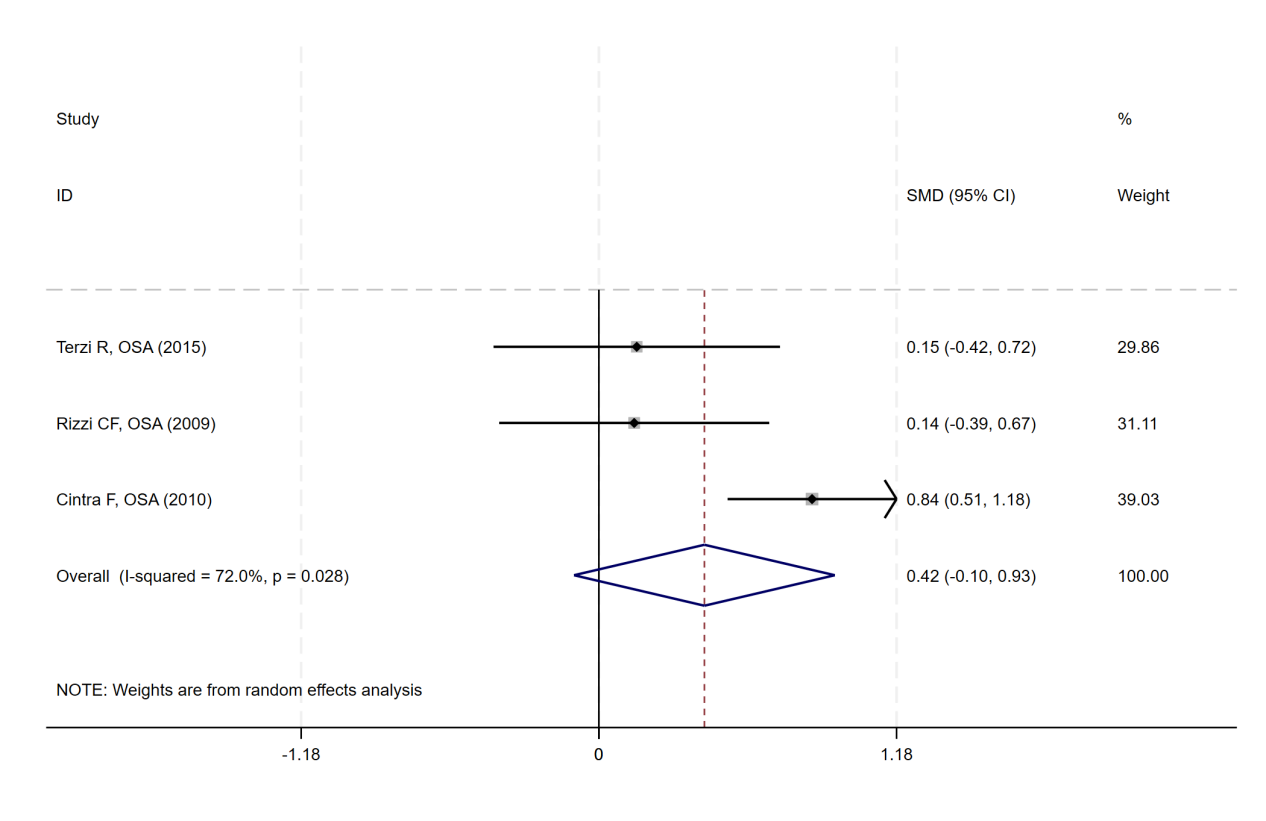


- 1. Body fat (Only sleep deprivation was included in the sleep disorder type, therefore network meta-analysis is not applicable.)
     1. Funnel plot


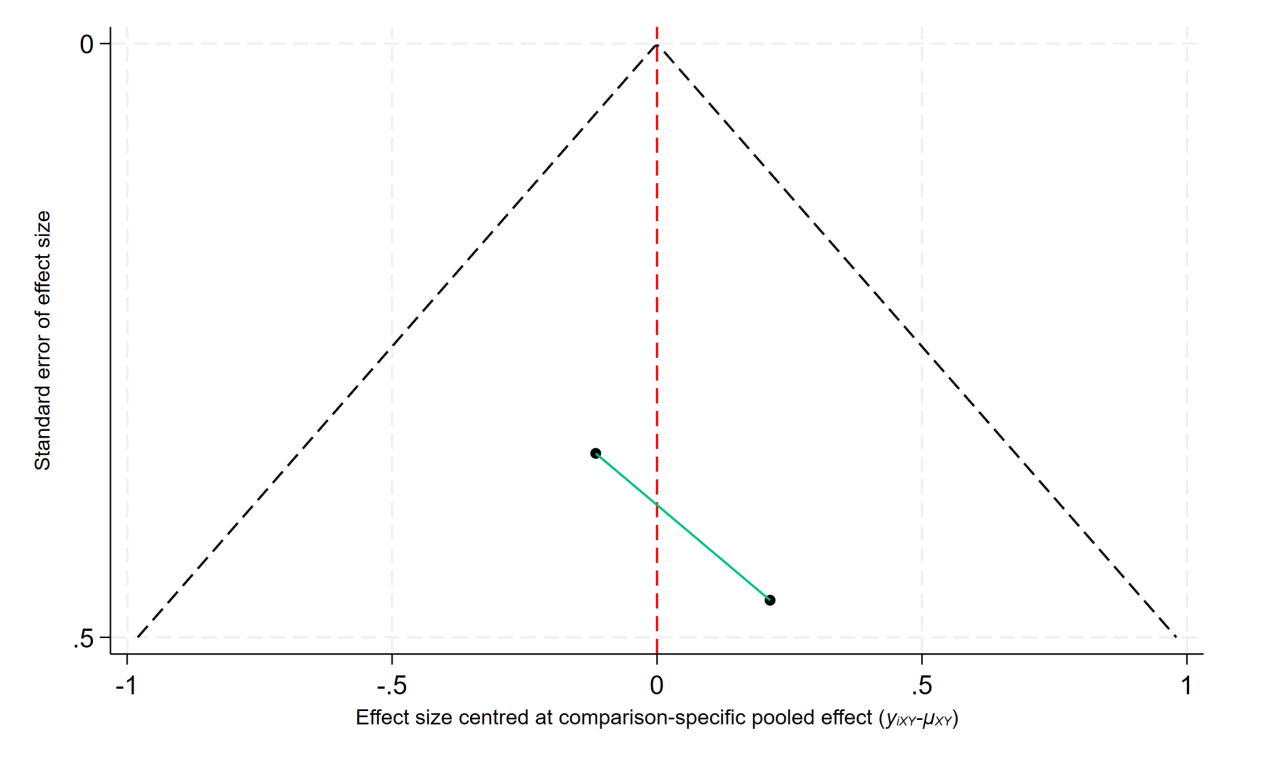


- - 1. Forest plot


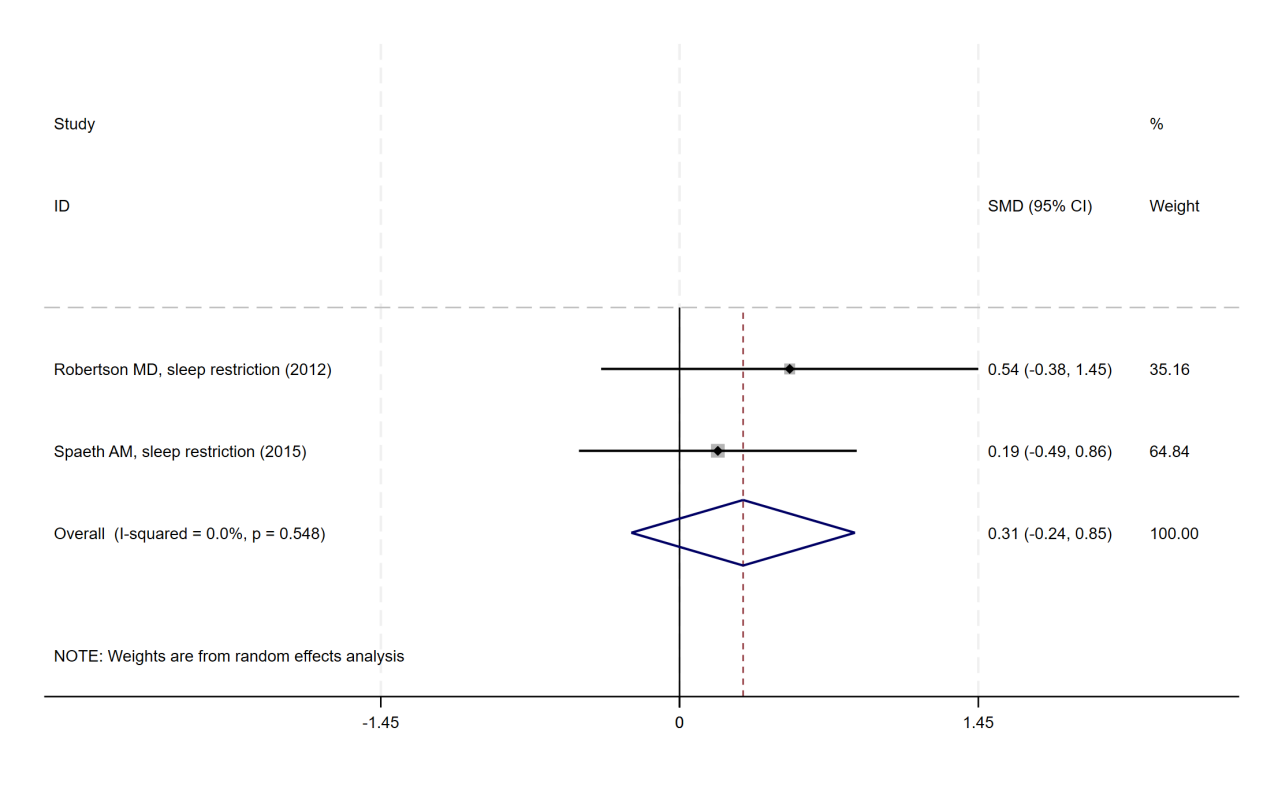


- 1. Fasting glucose (after elimination)
     1. Network map


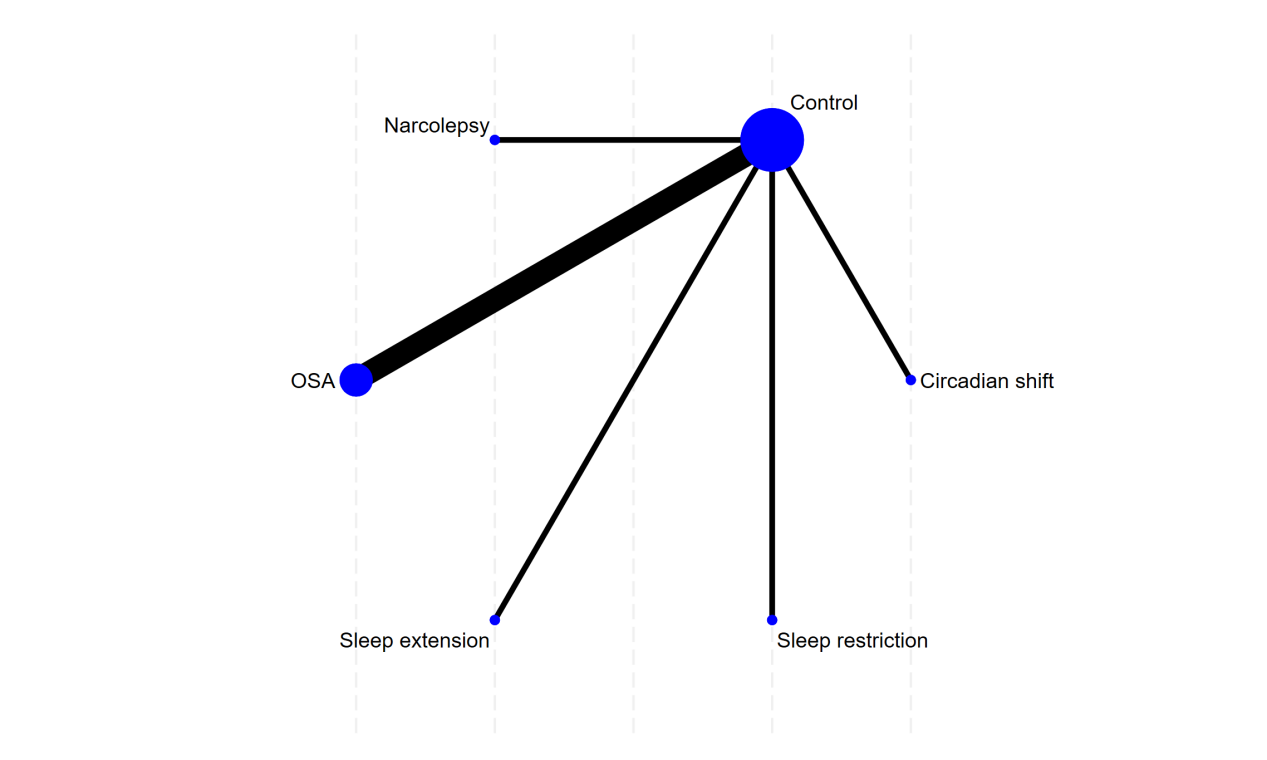


- - 1. Funnel plot


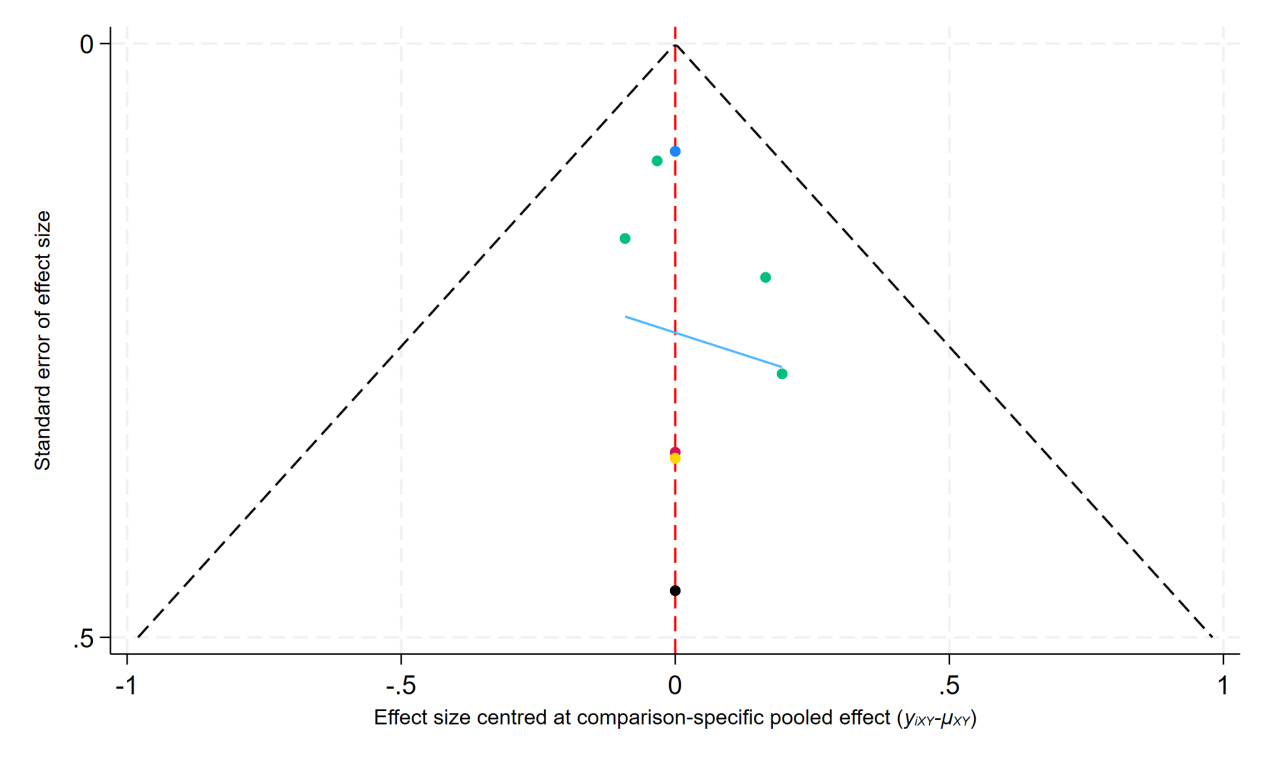


- - 1. SUCRA graph


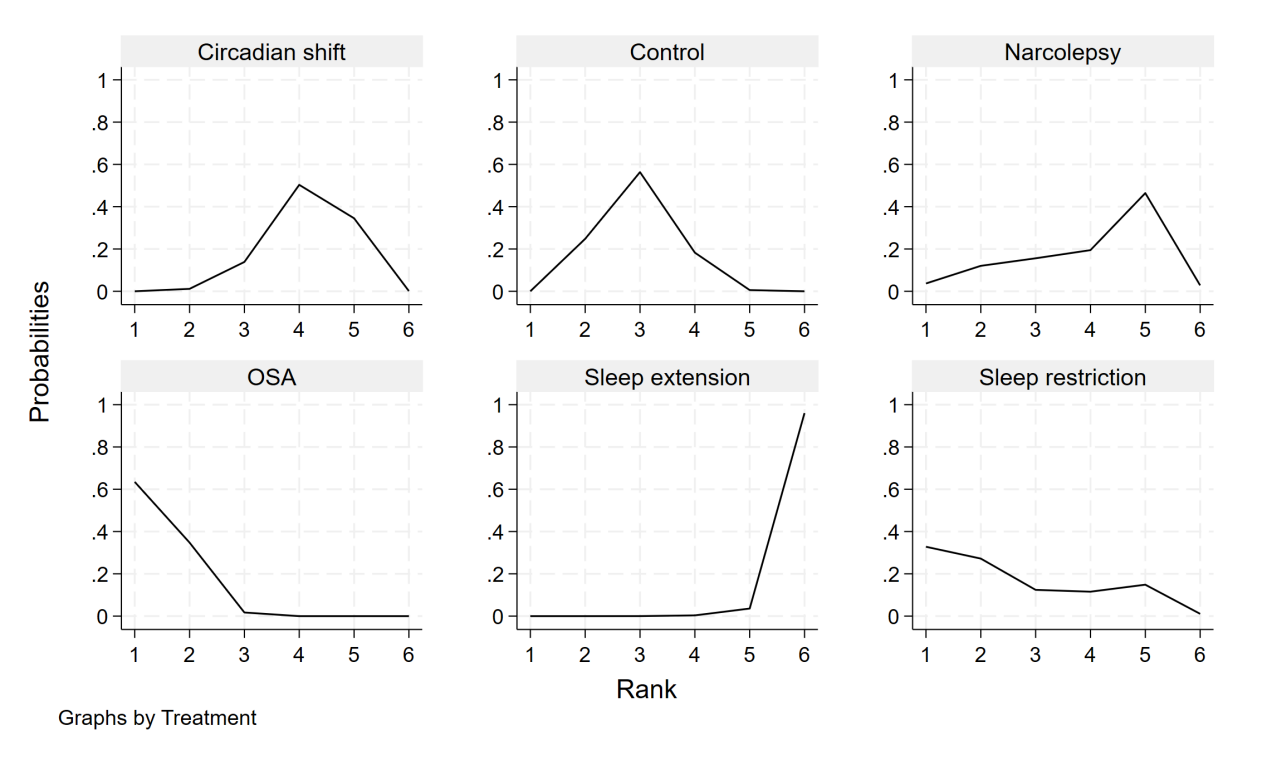


- - 1. League table


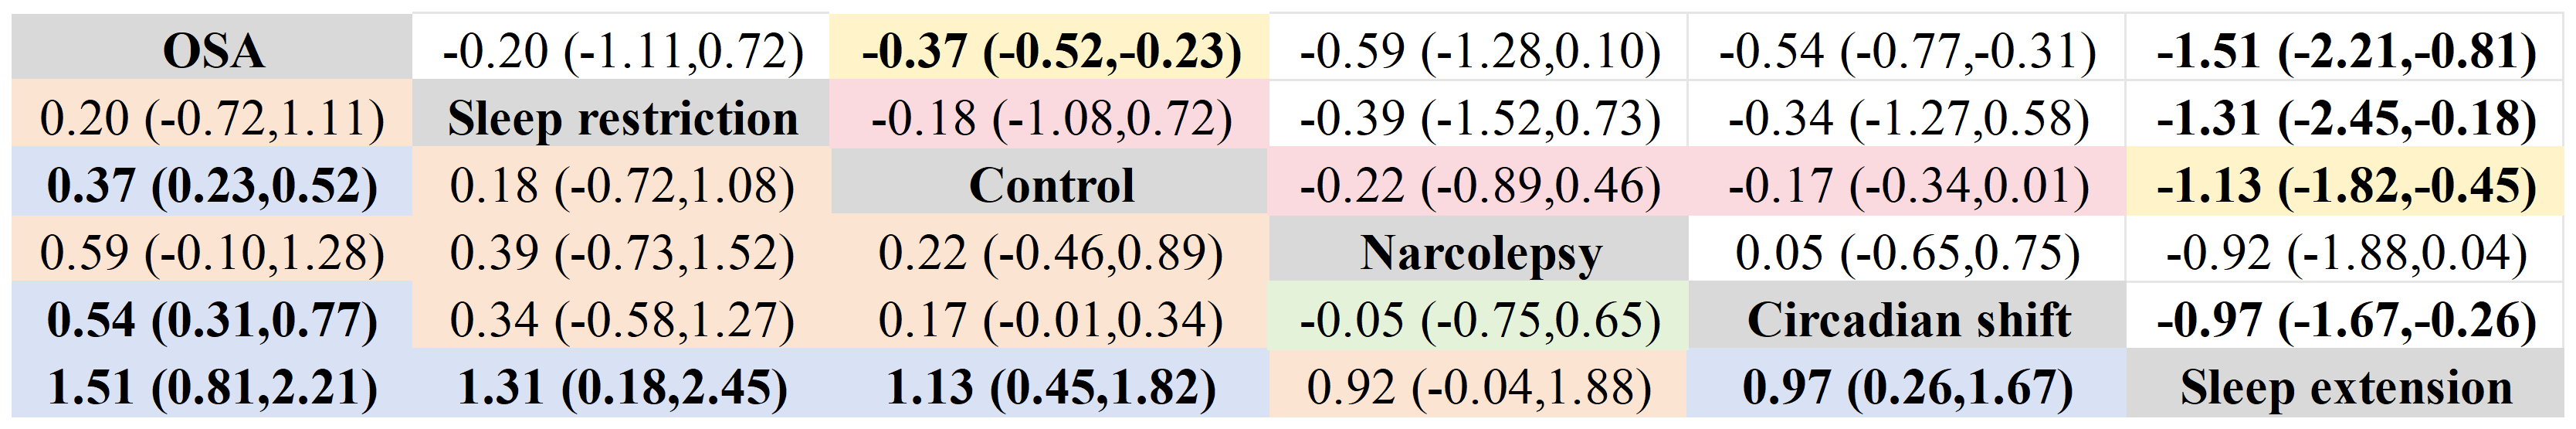


- - 1. Forest plot


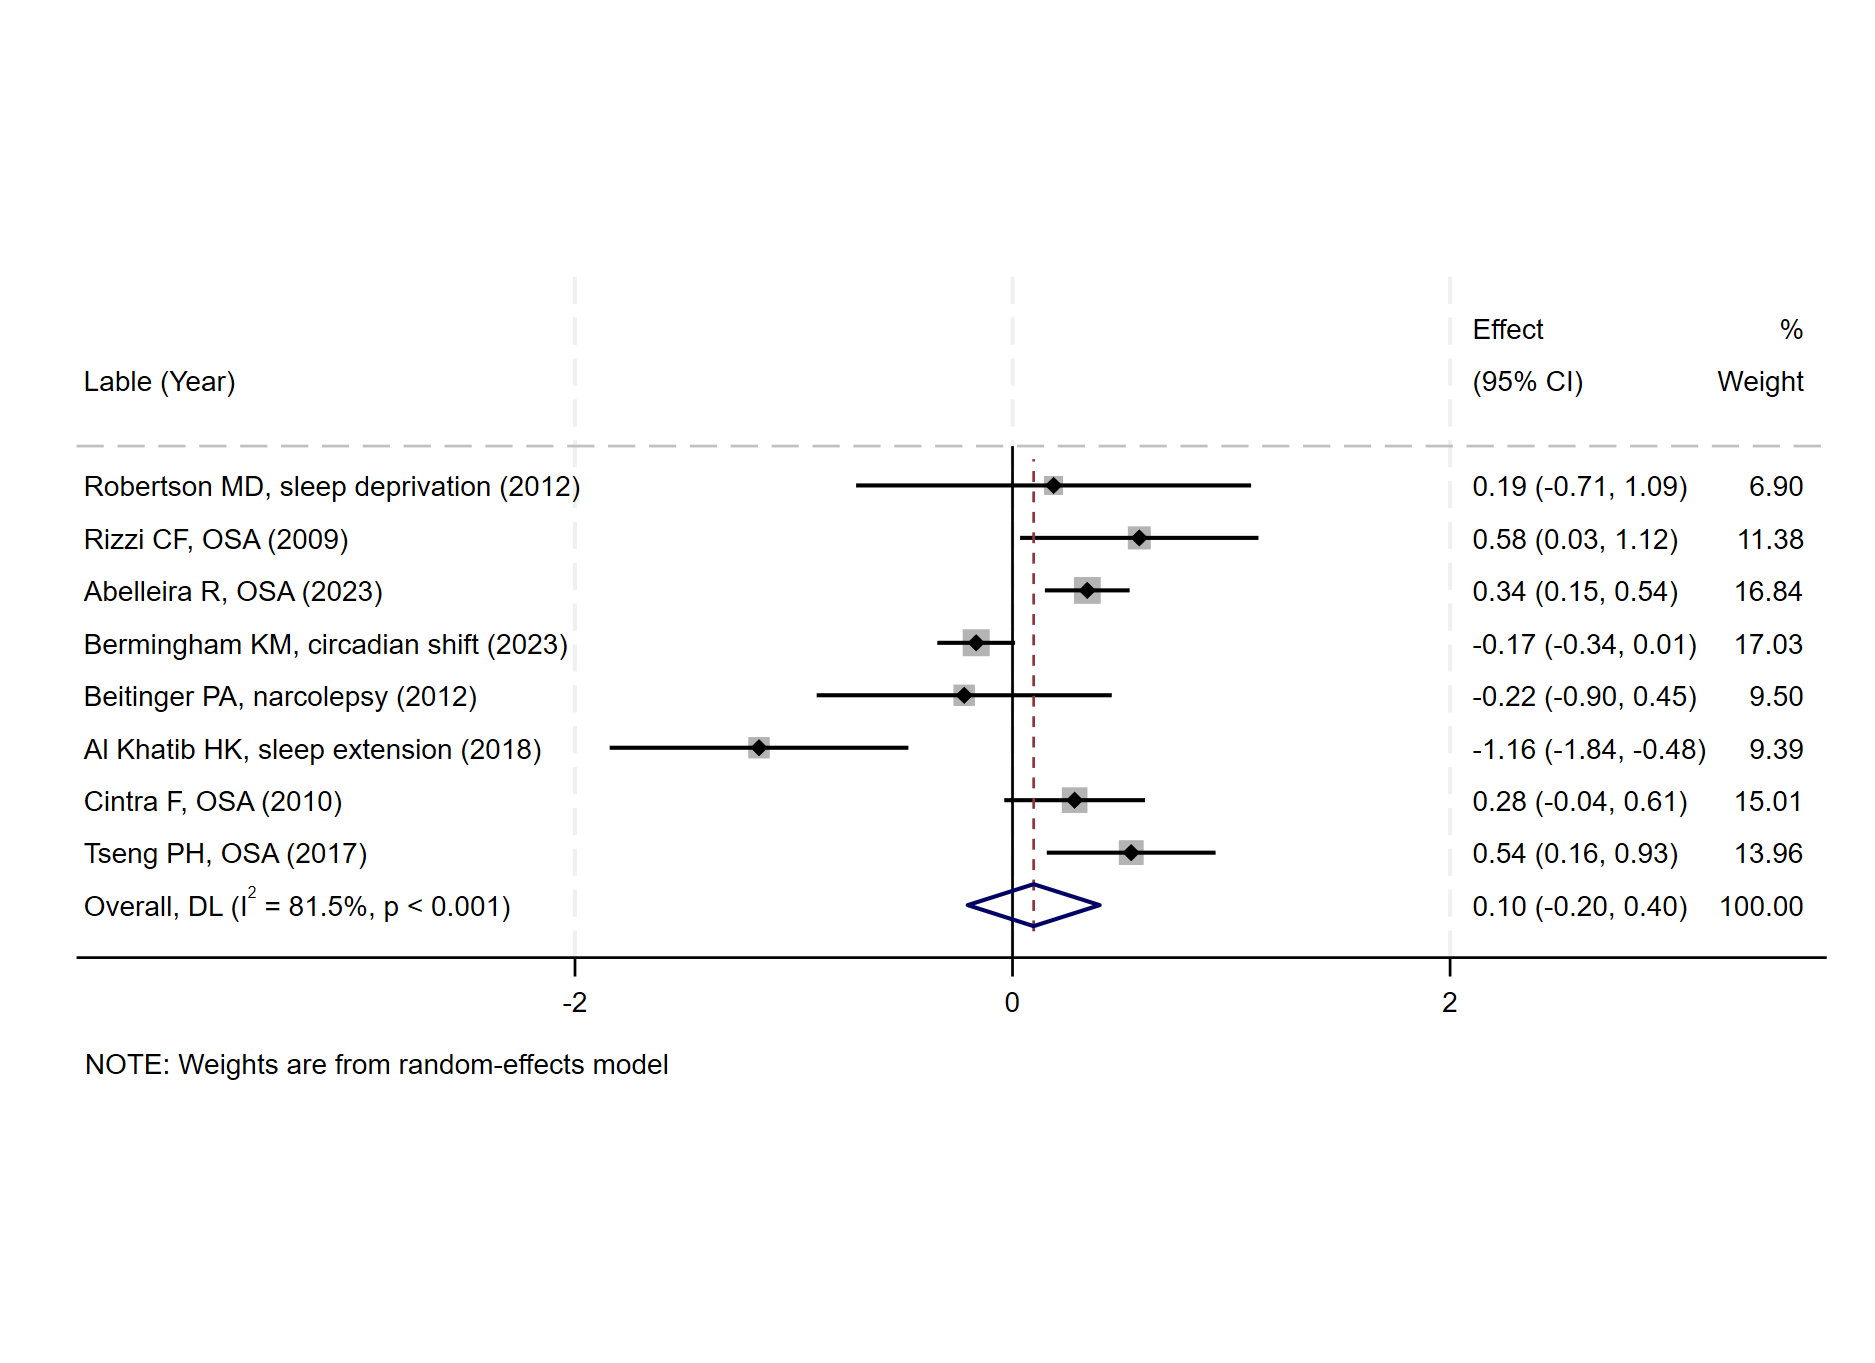


- 1. Fasting insulin (Only one study of OSA and one study of circadian shift was included in the sleep disorder type, therefore there is no source of heterogeneity for network meta-analysis)
     1. Funnel plot


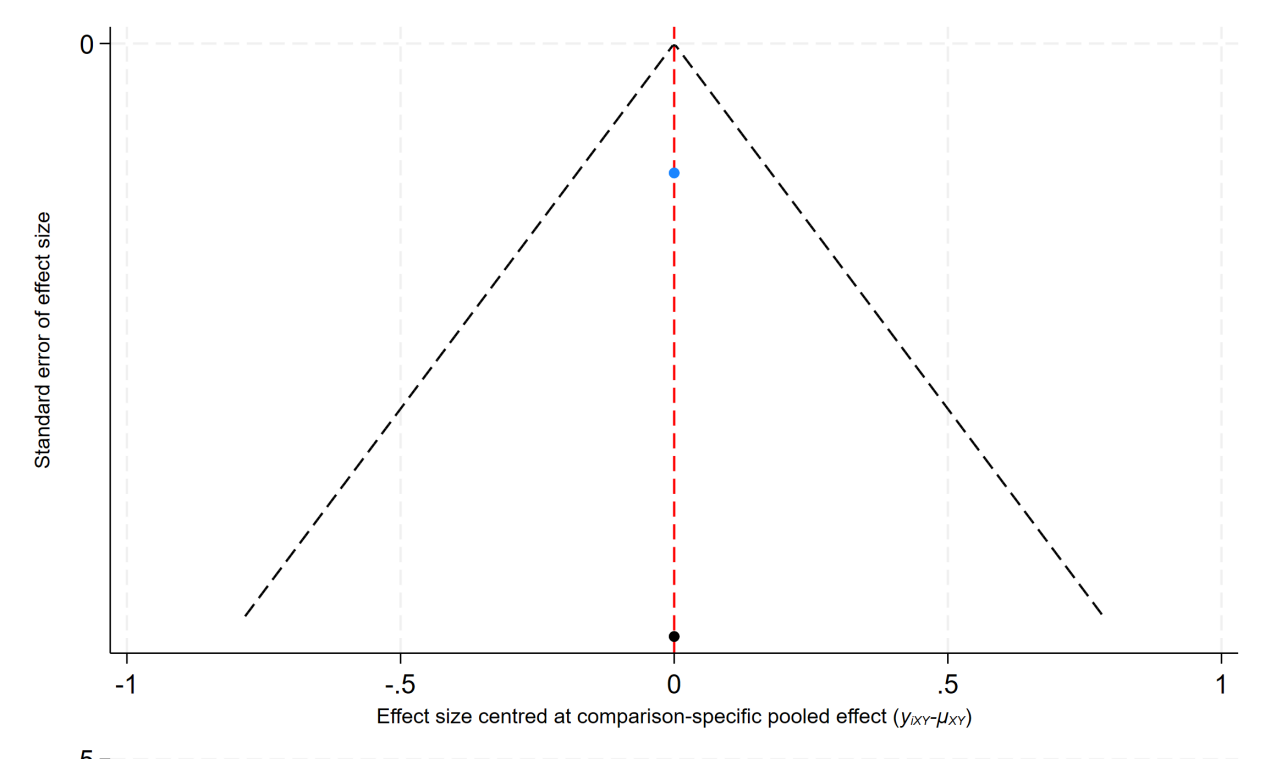


- - 1. Forest plot


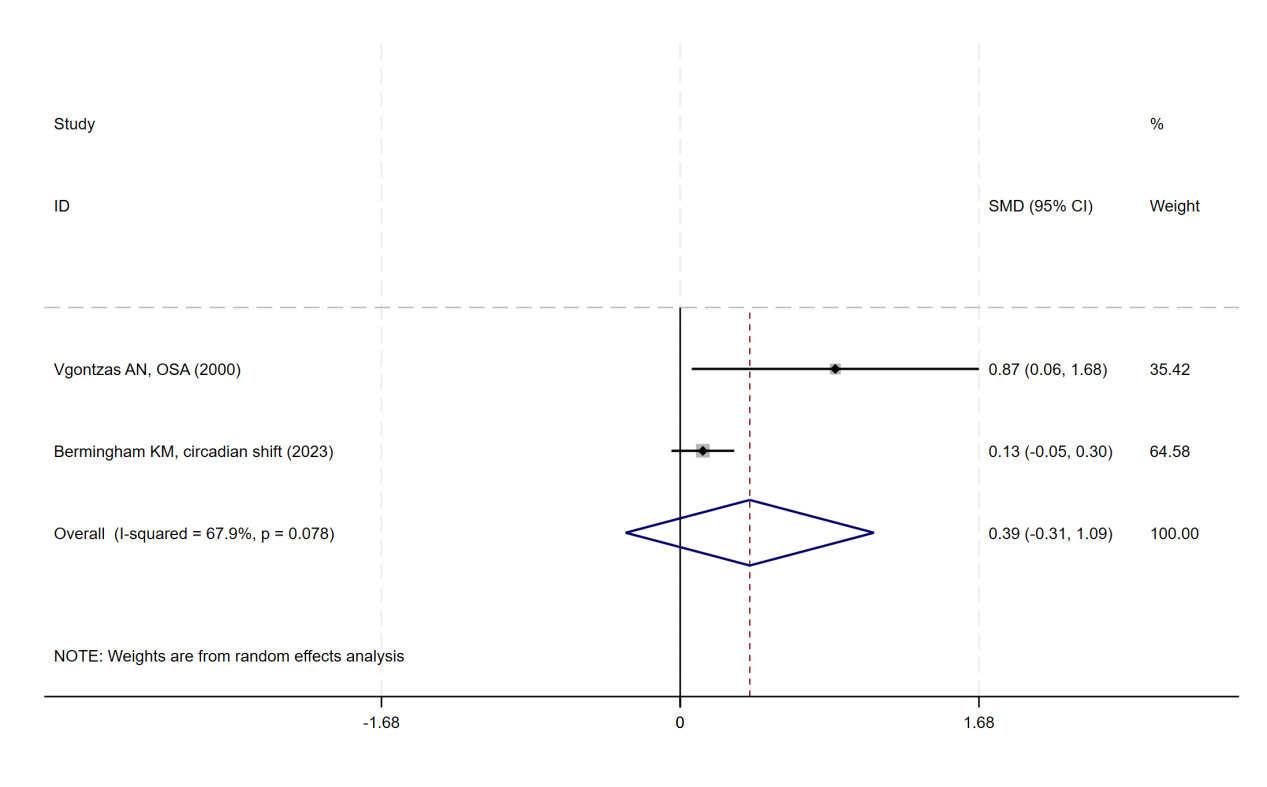


- 1. HbA1c
     1. Network map


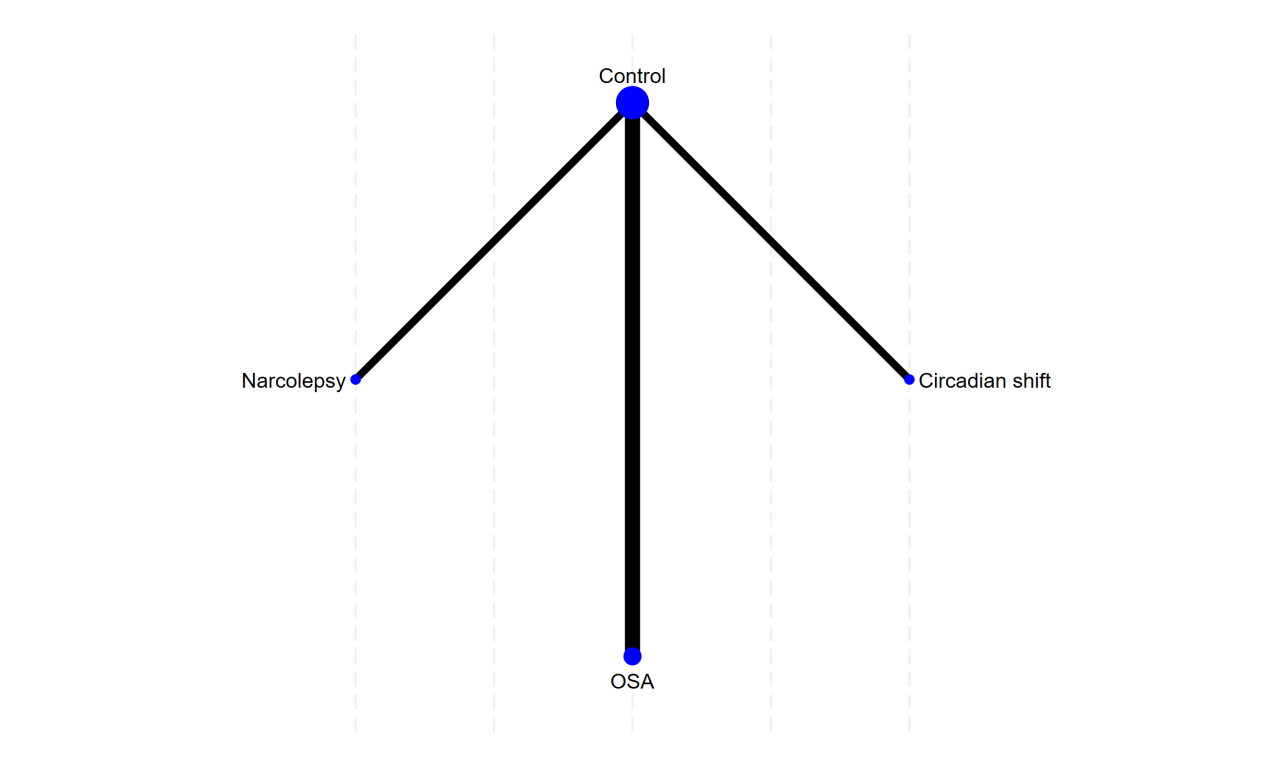


- - 1. Funnel plot


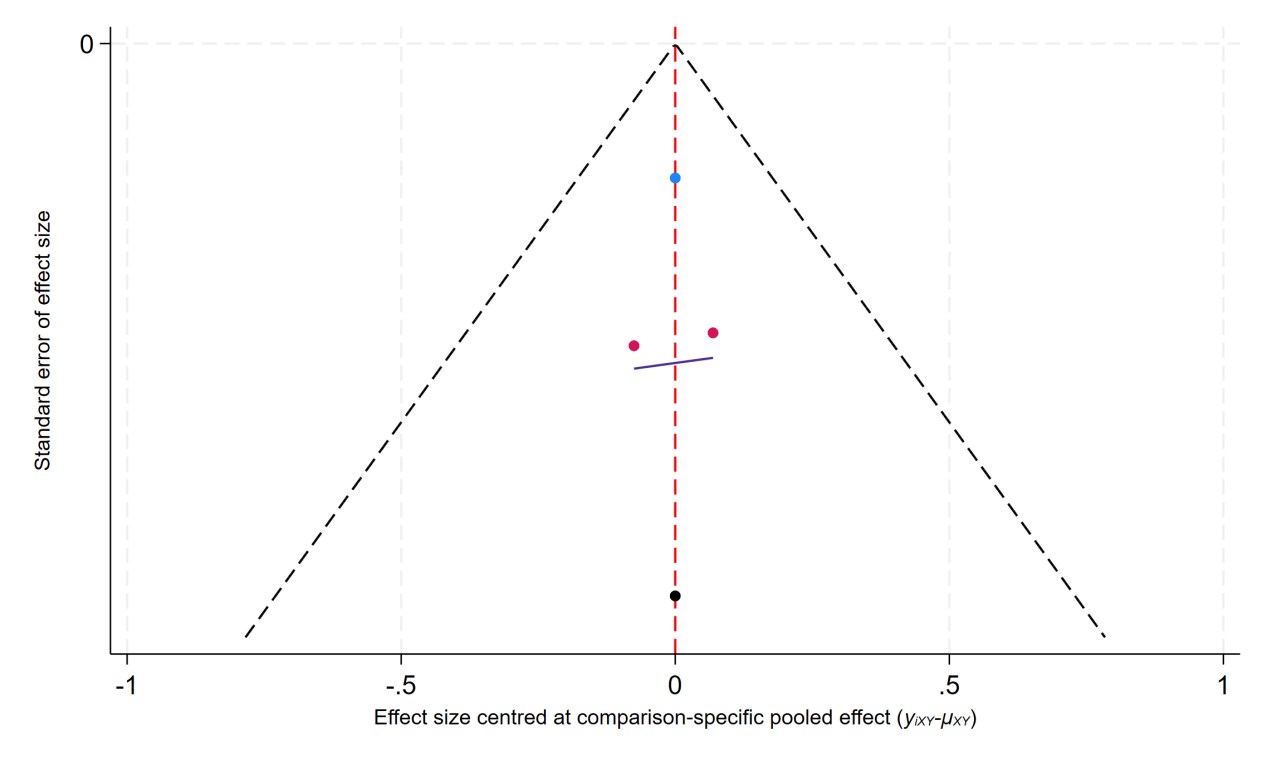


- - 1. SUCRA graph


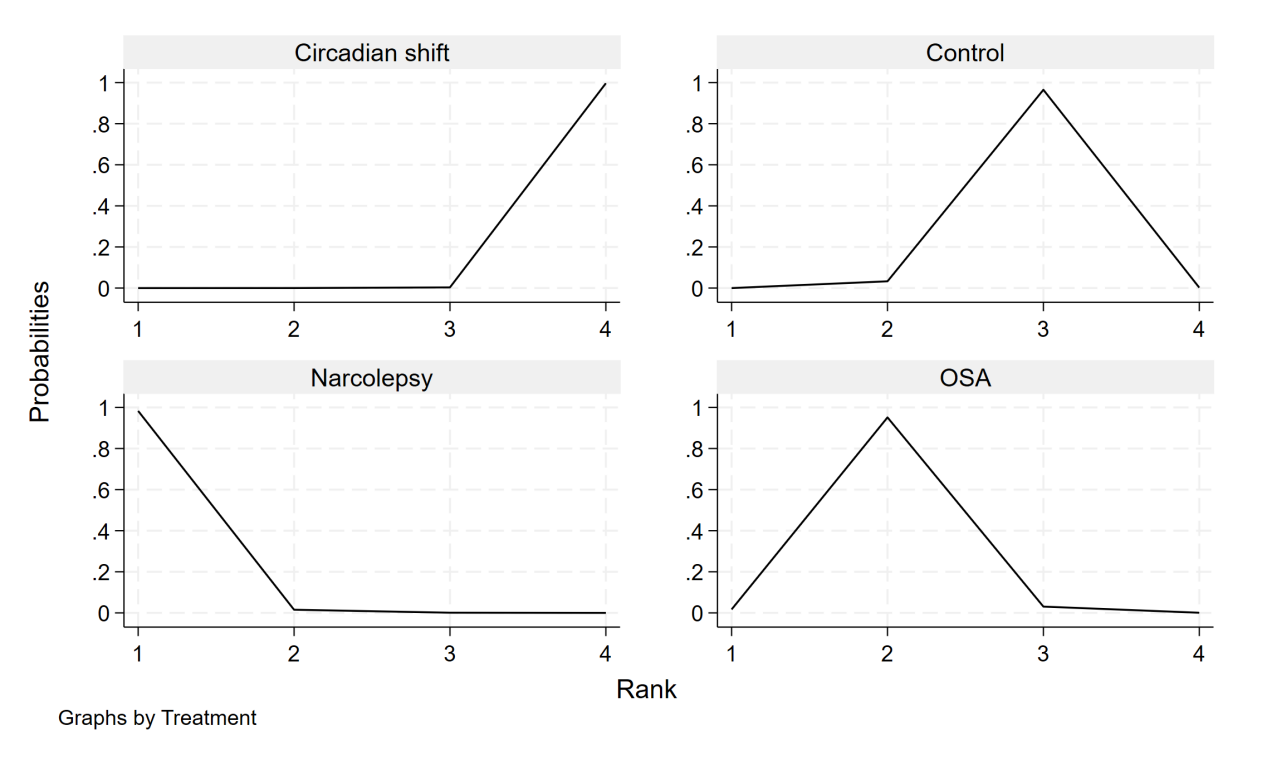


- - 1. League table (before eliminating the sensitive publication)


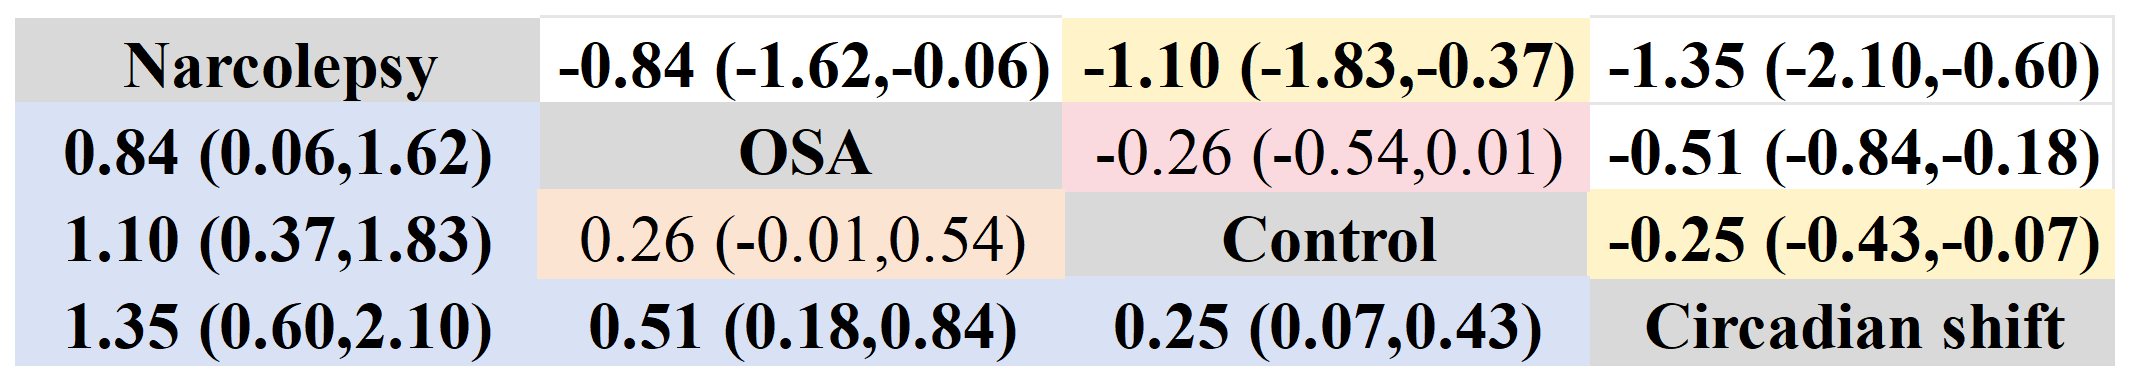


- - 1. League table (after eliminating the sensitive publication)


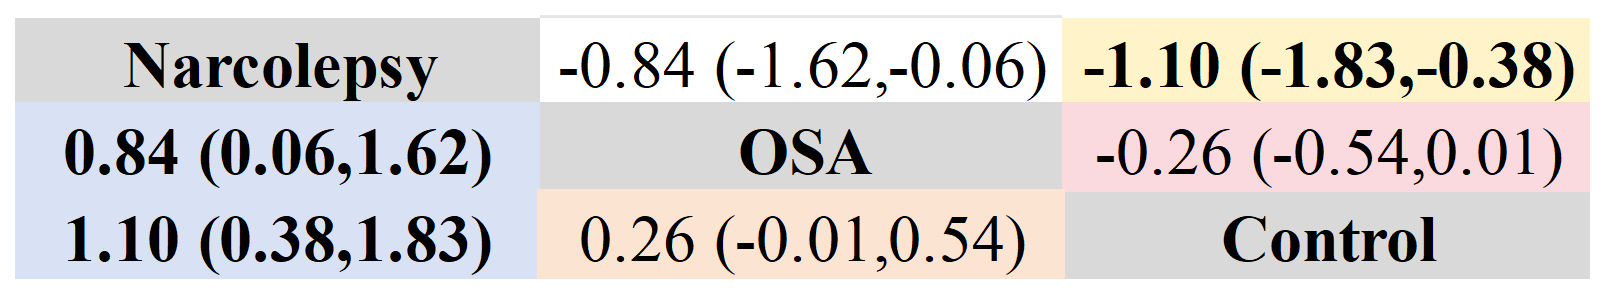


- - 1. Forest plot


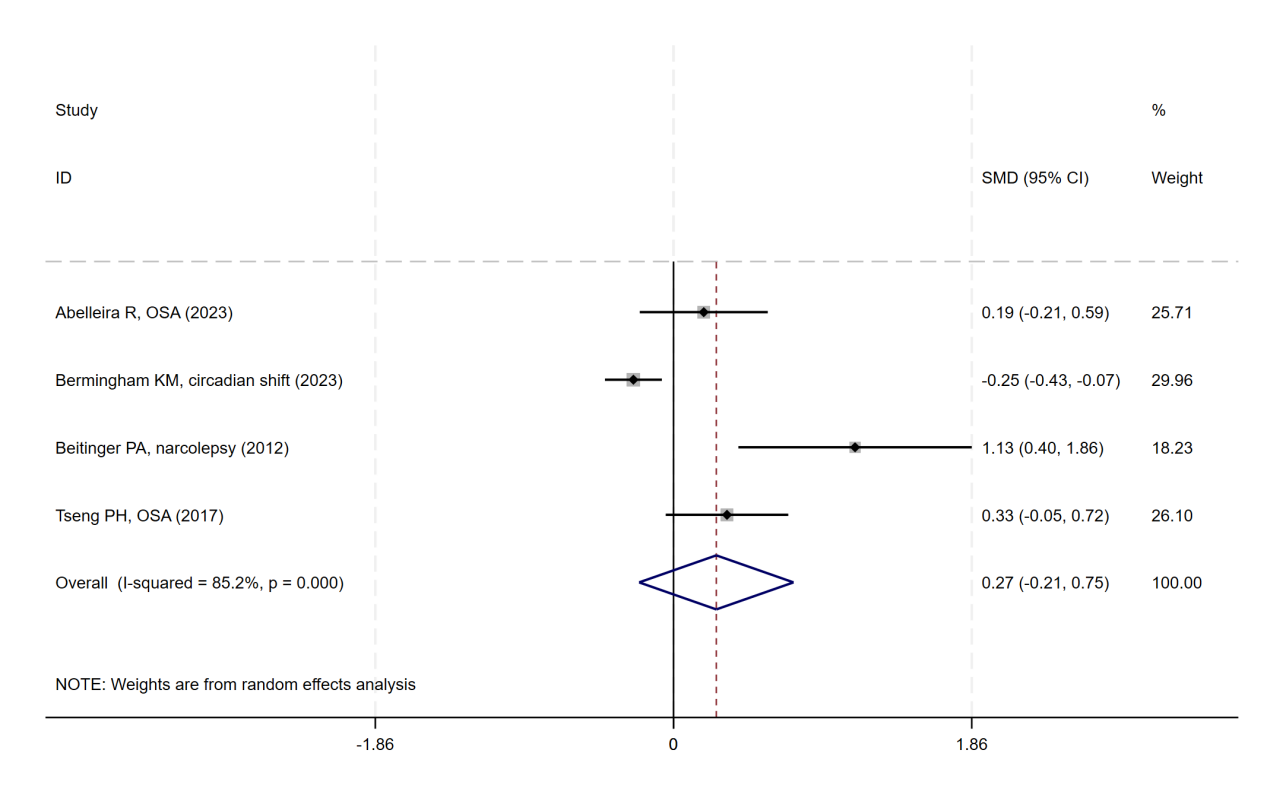


- 1. LDL
     1. Network map


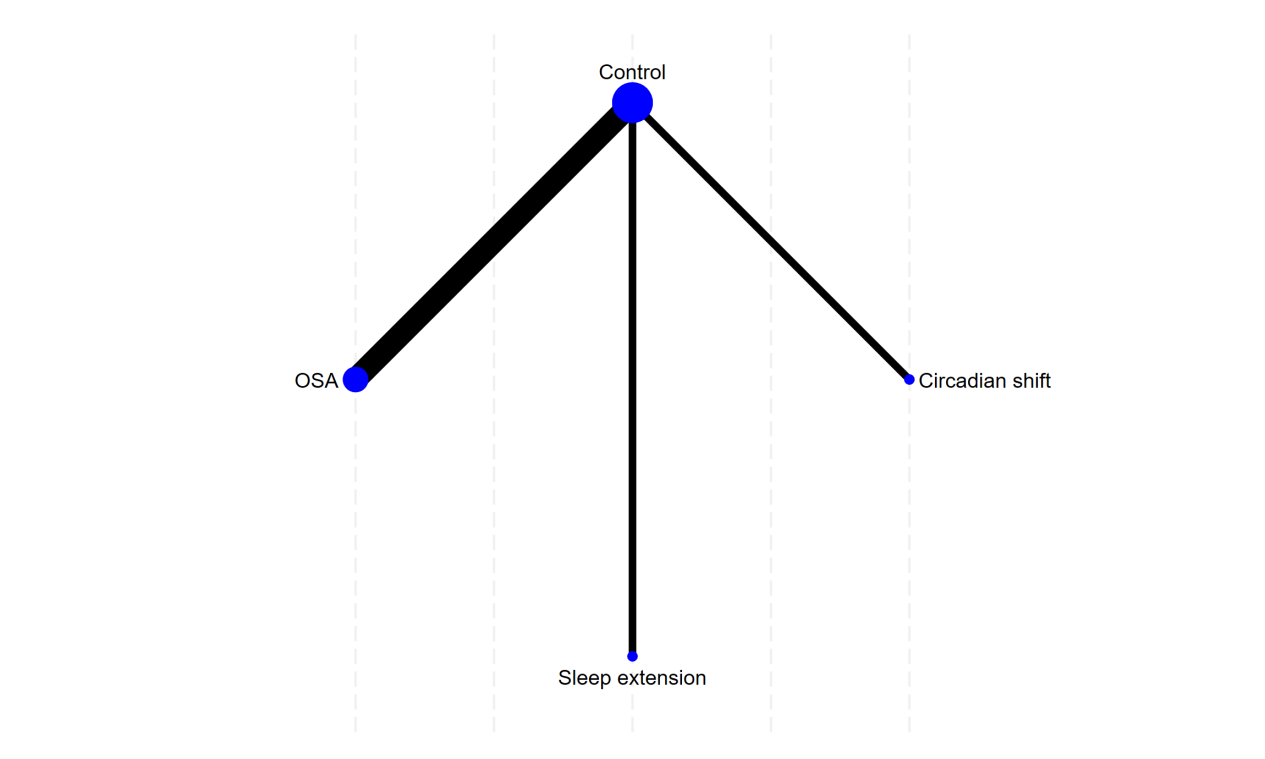


- - 1. Funnel plot


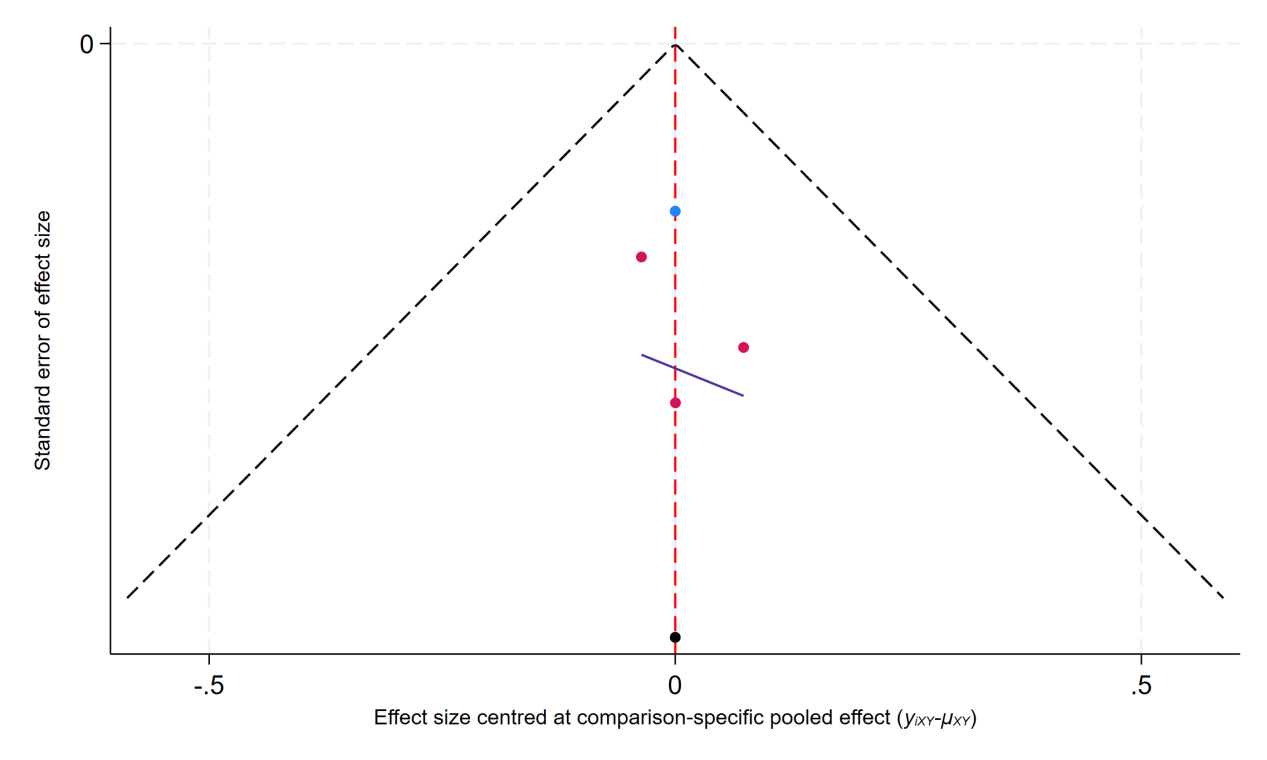


- - 1. SUCRA graph


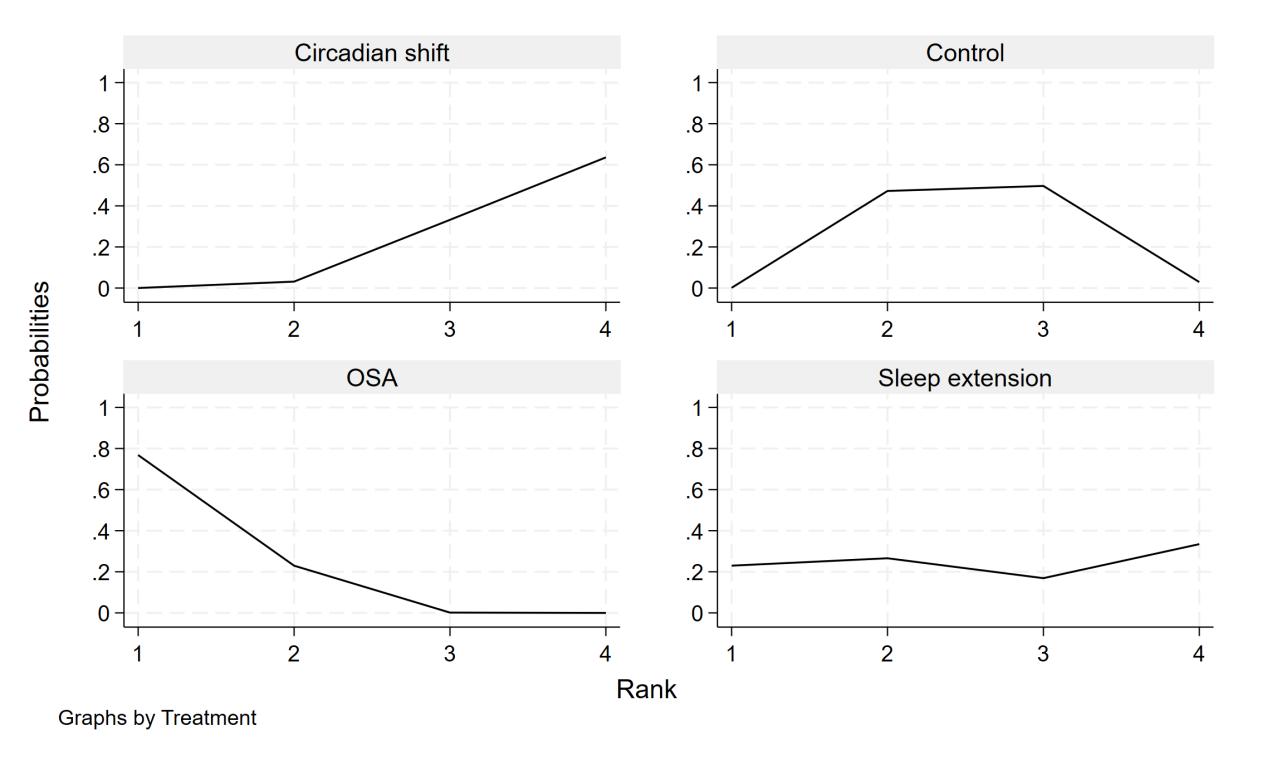


- - 1. League table


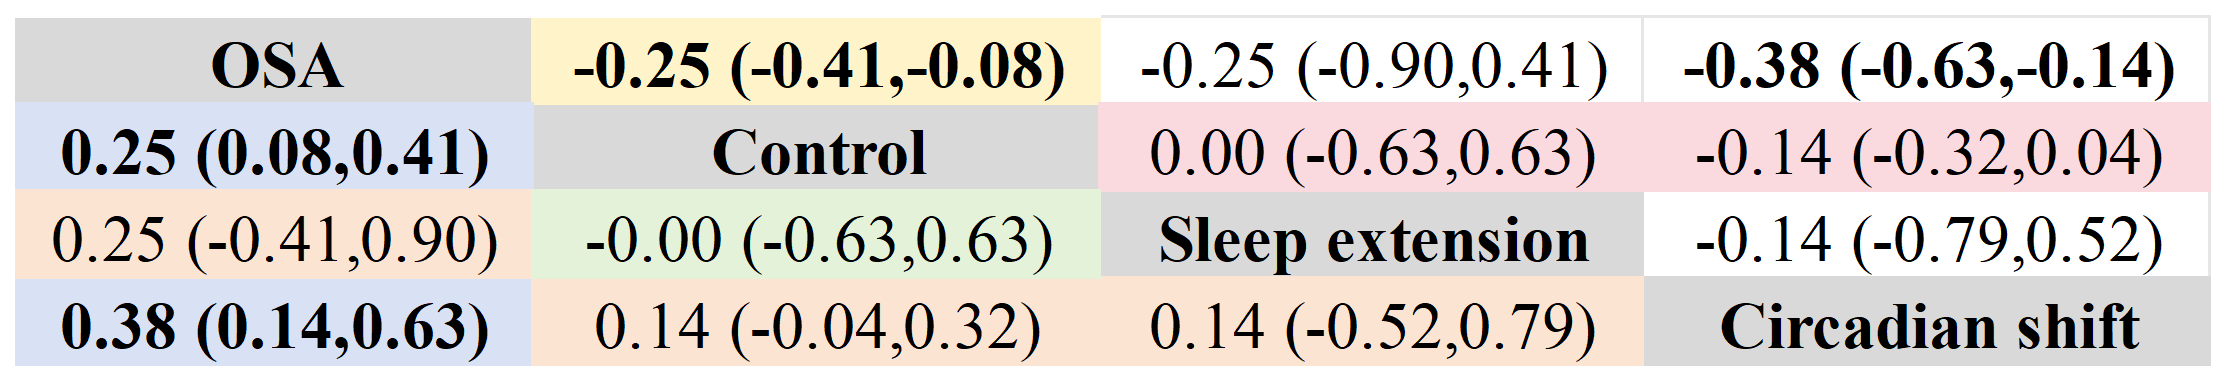


- - 1. Forest plot


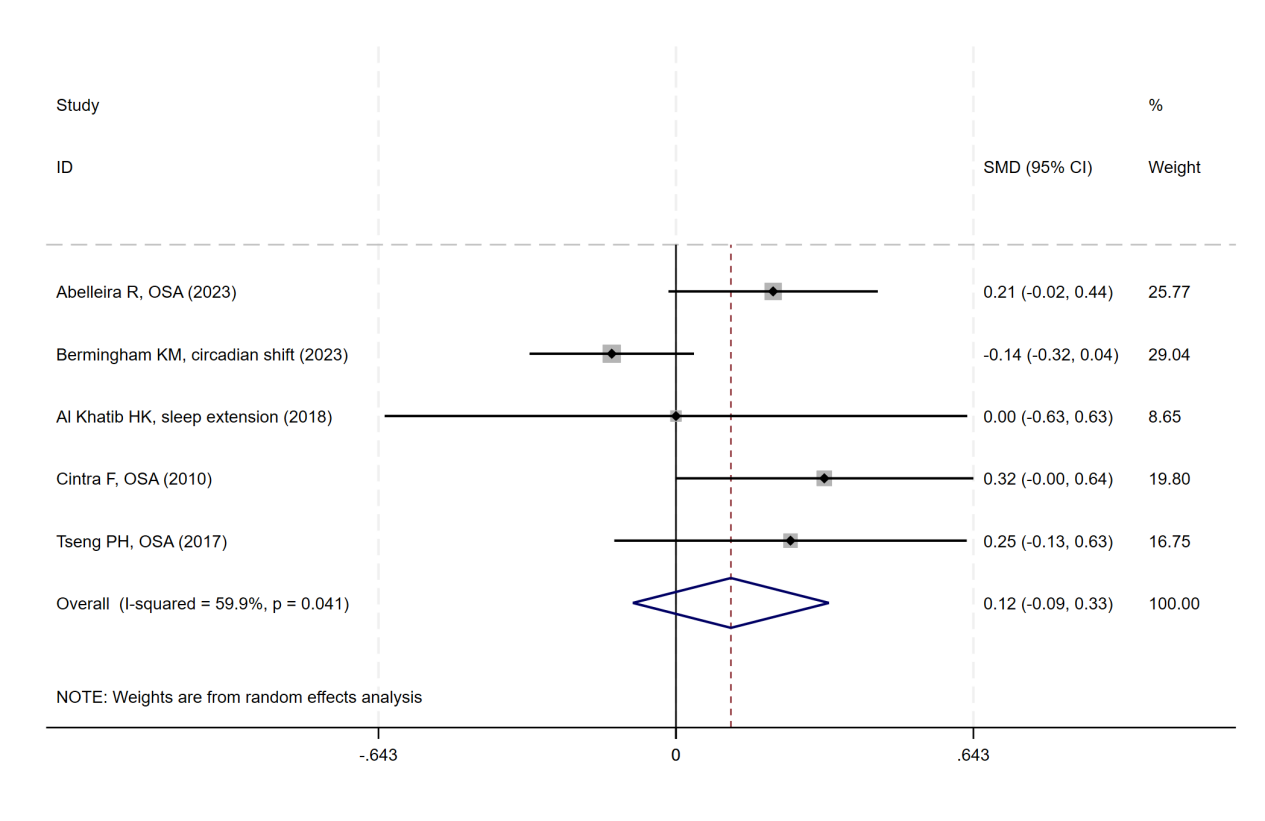


- 1. HDL
     1. Network map


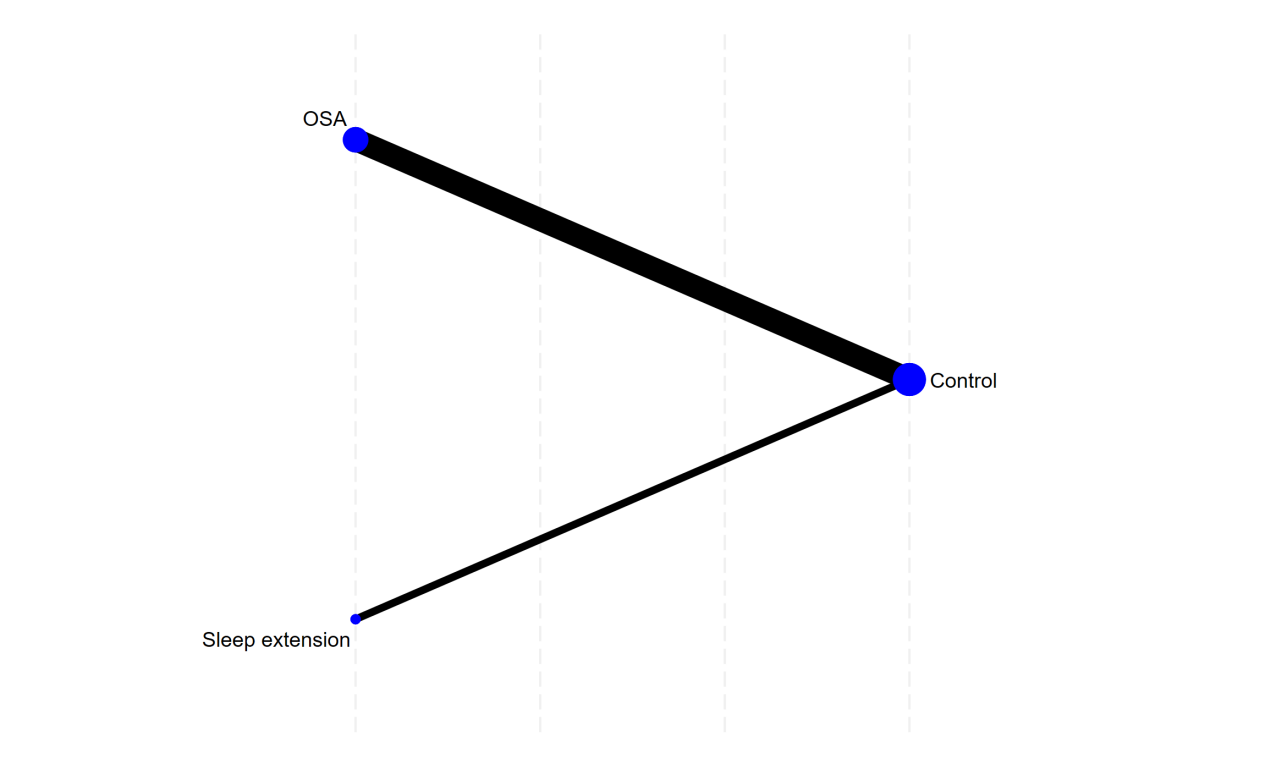


- - 1. Funnel plot


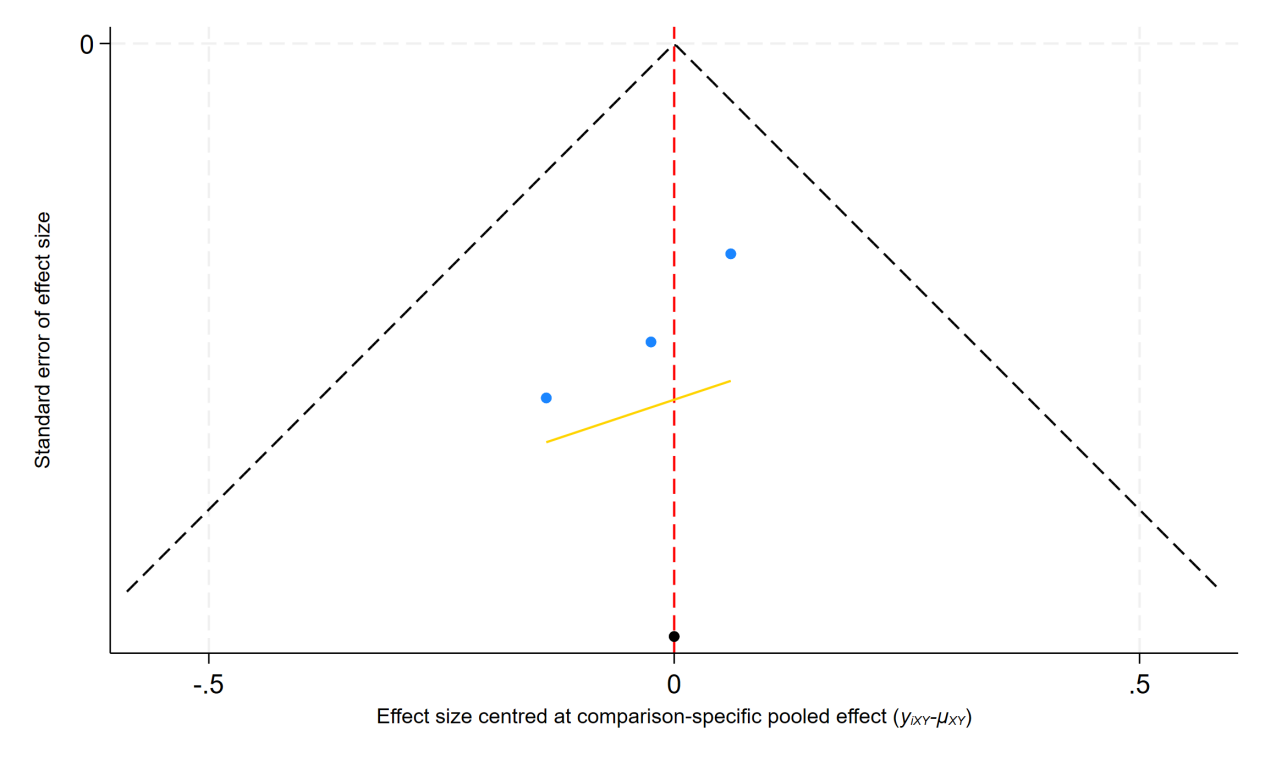


- - 1. SUCRA graph


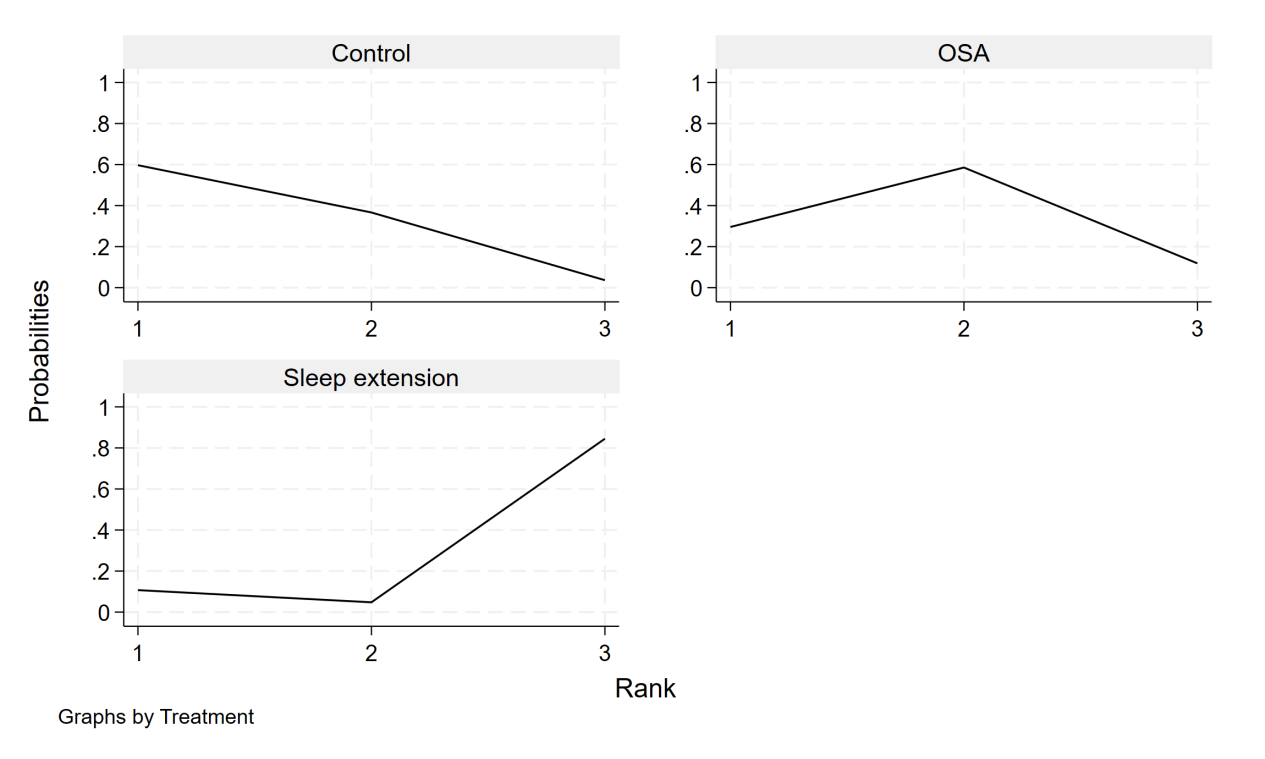


- - 1. League table (before eliminating the sensitive publication)


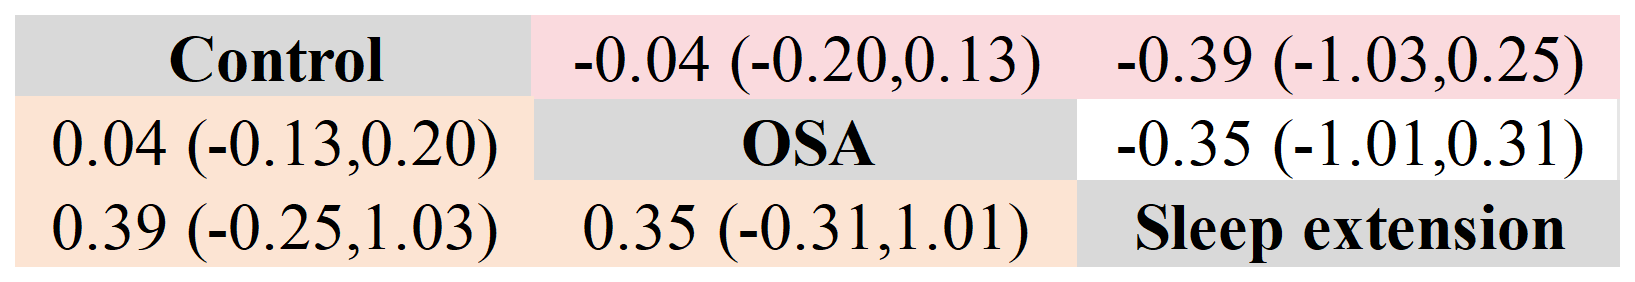


- - 1. League table (after eliminating the sensitive publication)


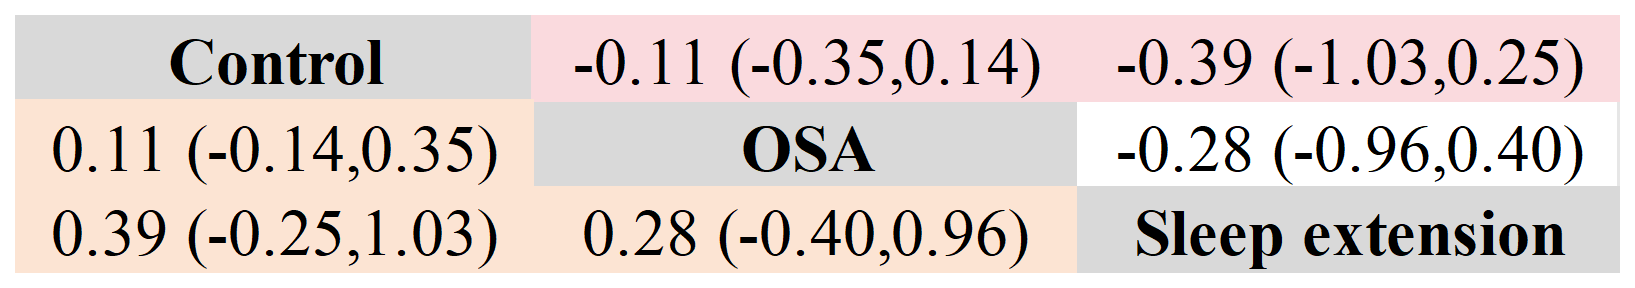


- - 1. Forest plot


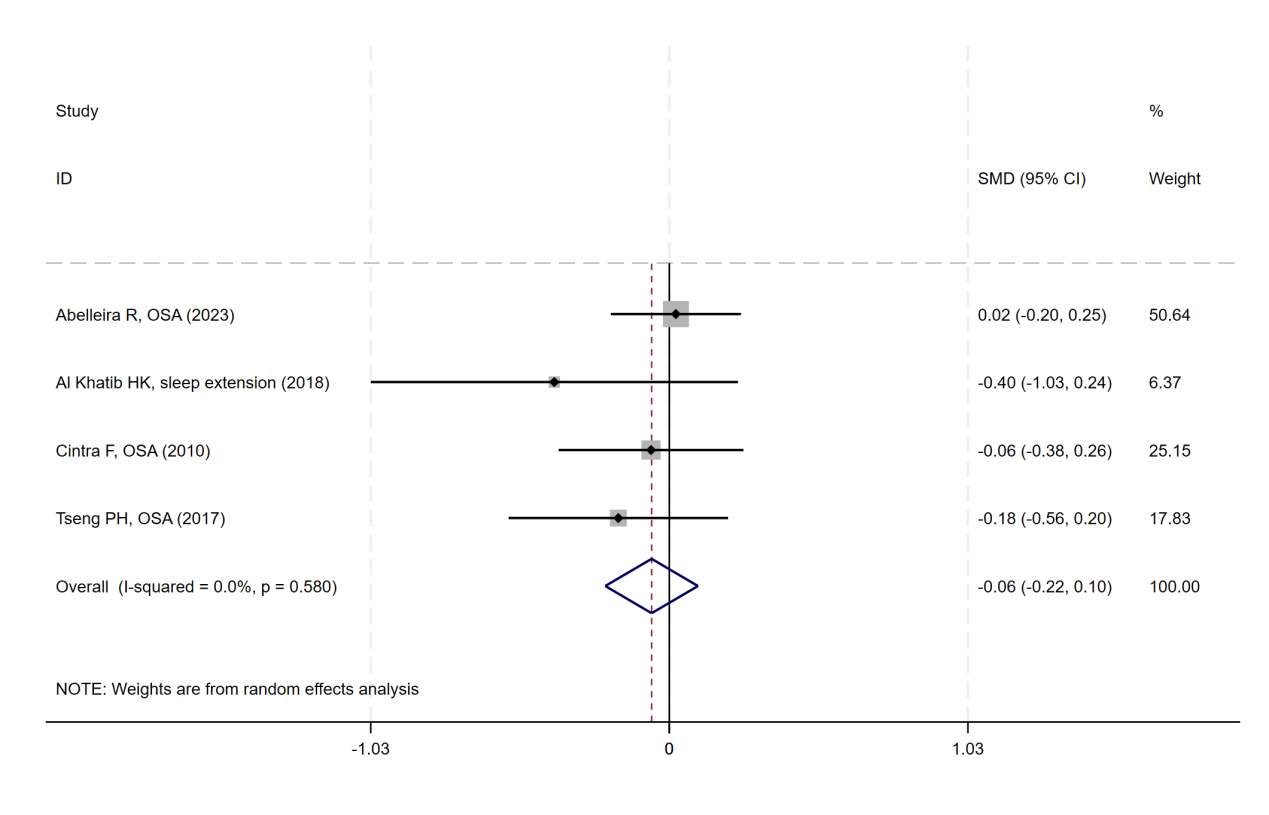


- 1. Leptin
     1. Network map


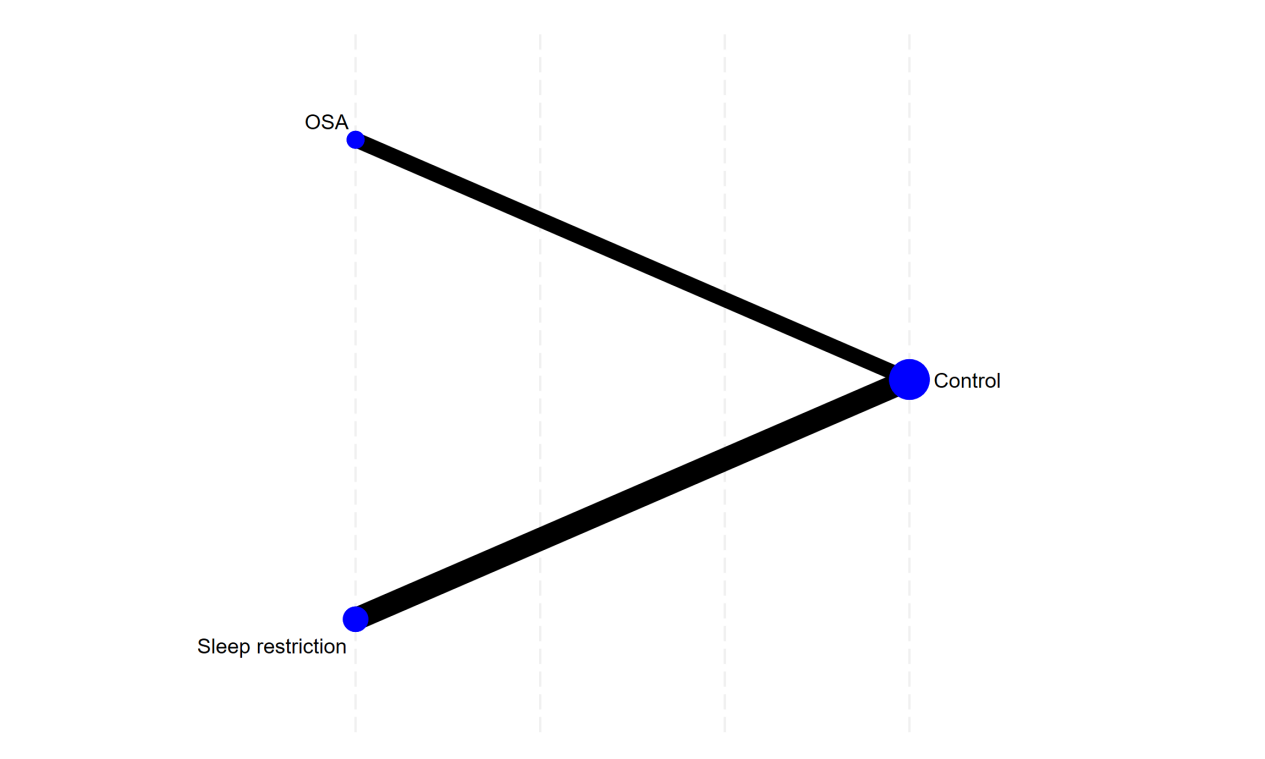


- - 1. Funnel plot


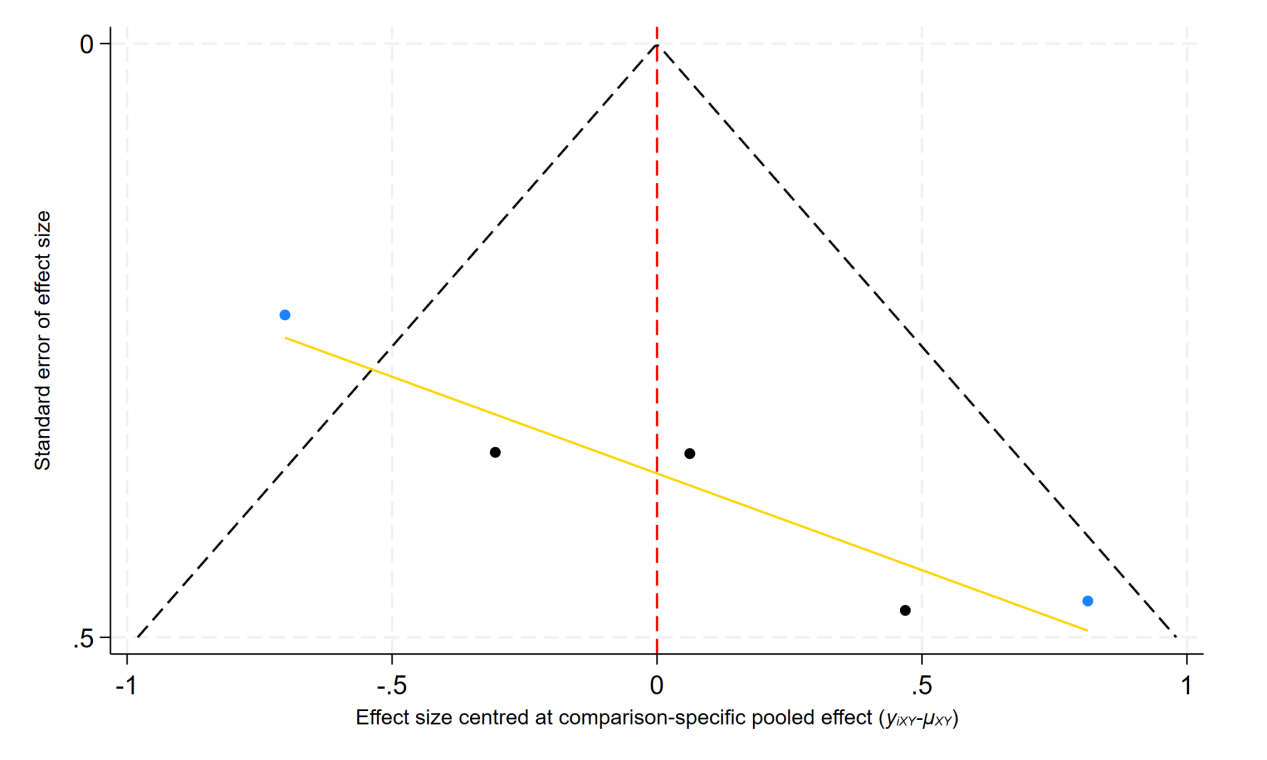


- - 1. SUCRA graph


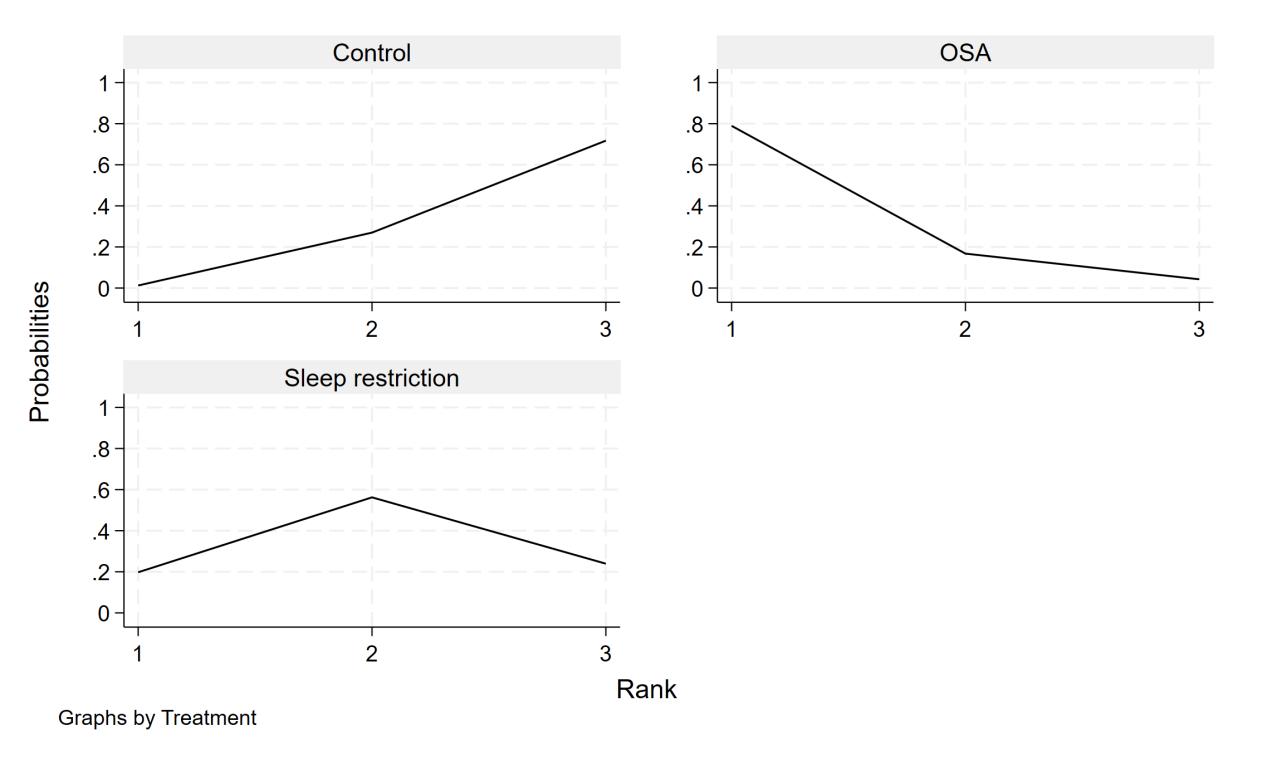


- - 1. League table


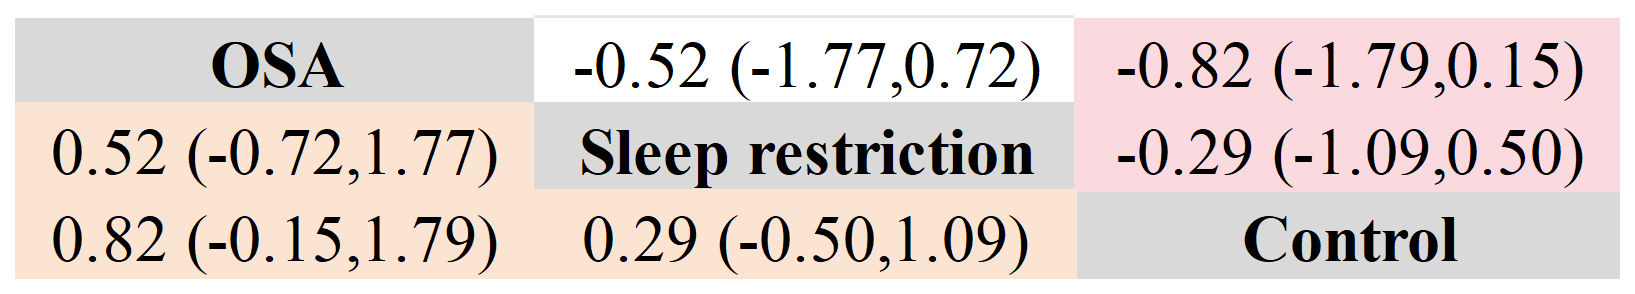


- - 1. Forest plot


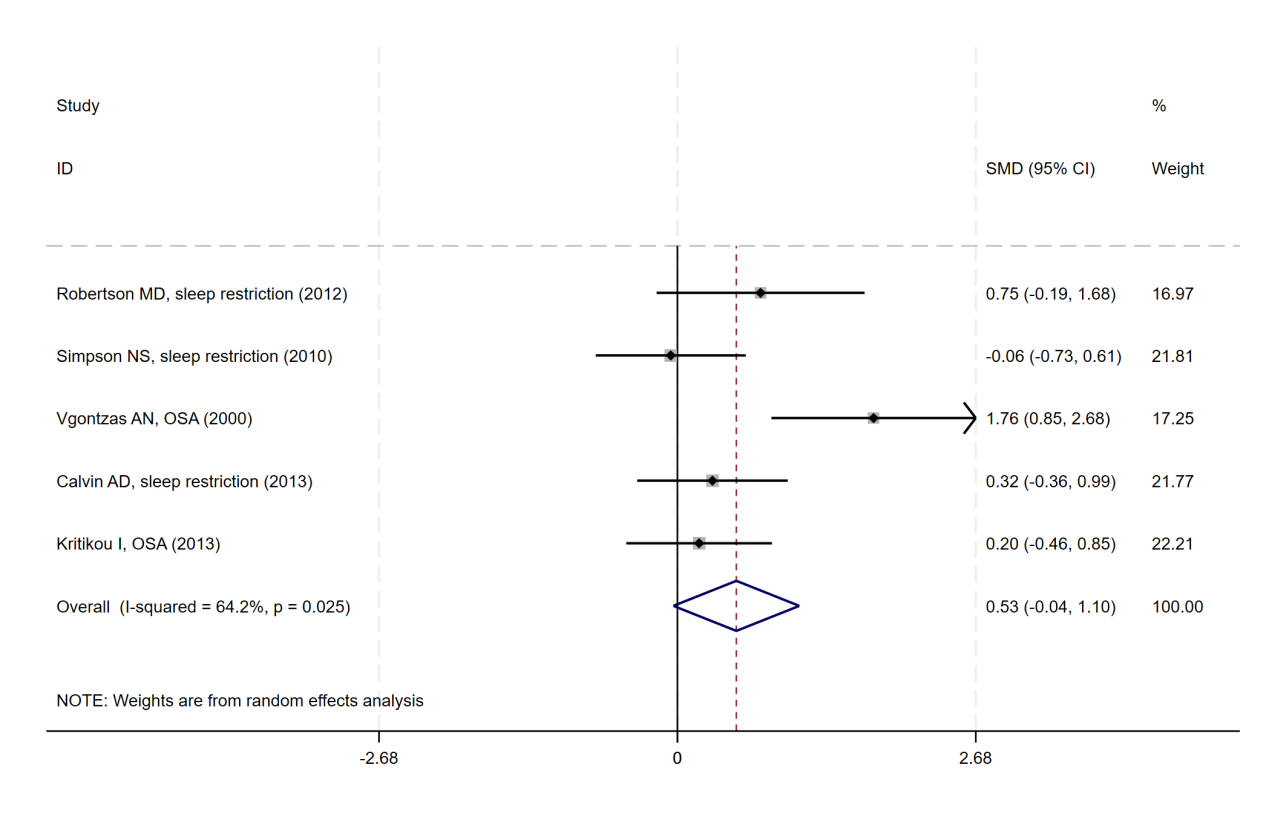


1. Crossover designed studies
   1. Weight
      1. Forest plot


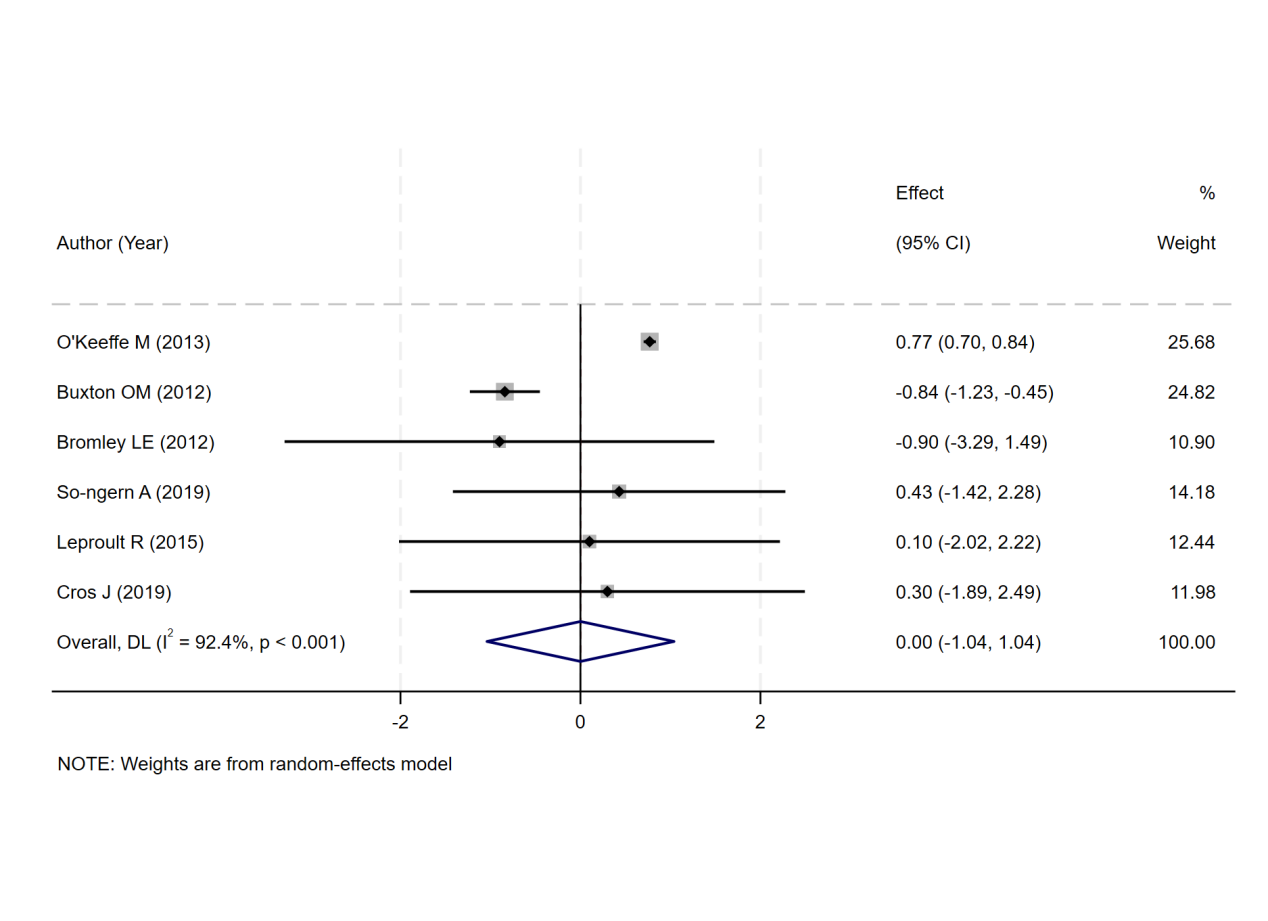


- - 1. Funnel plot


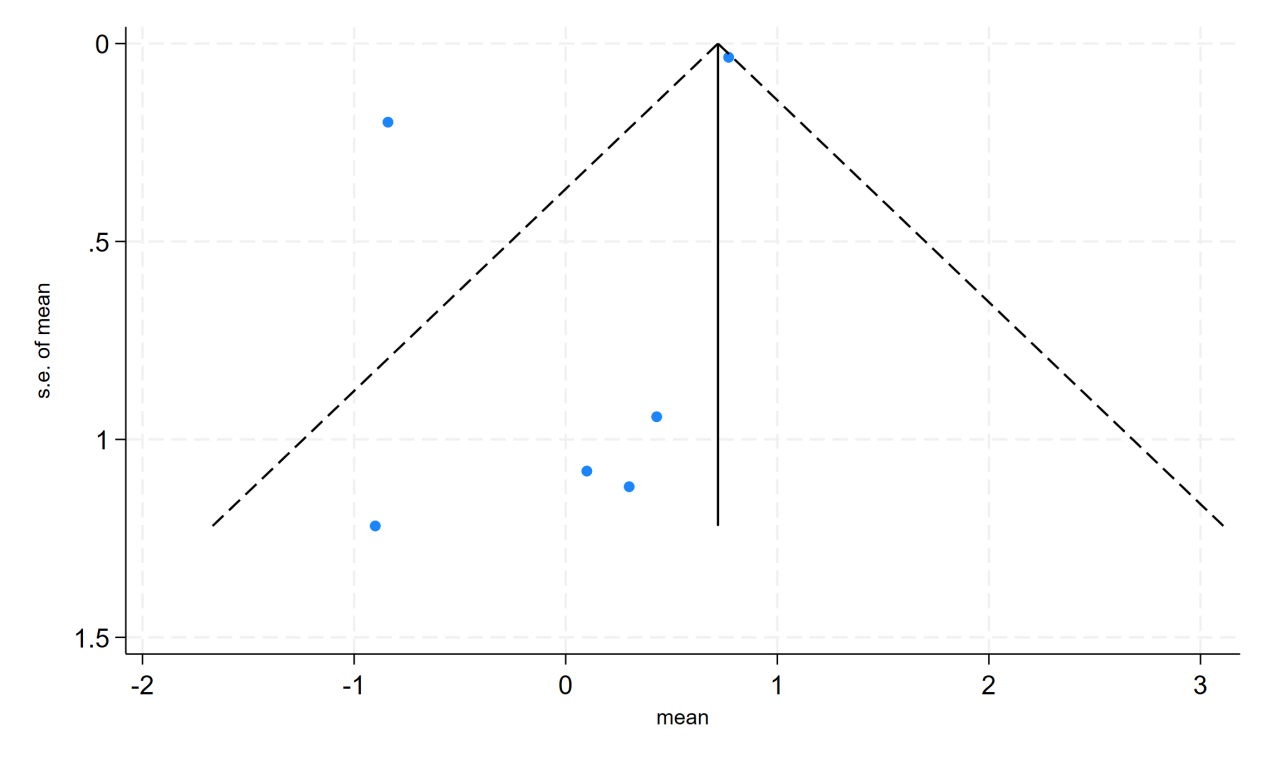


- 1. Fasting glucose
     1. Forest plot


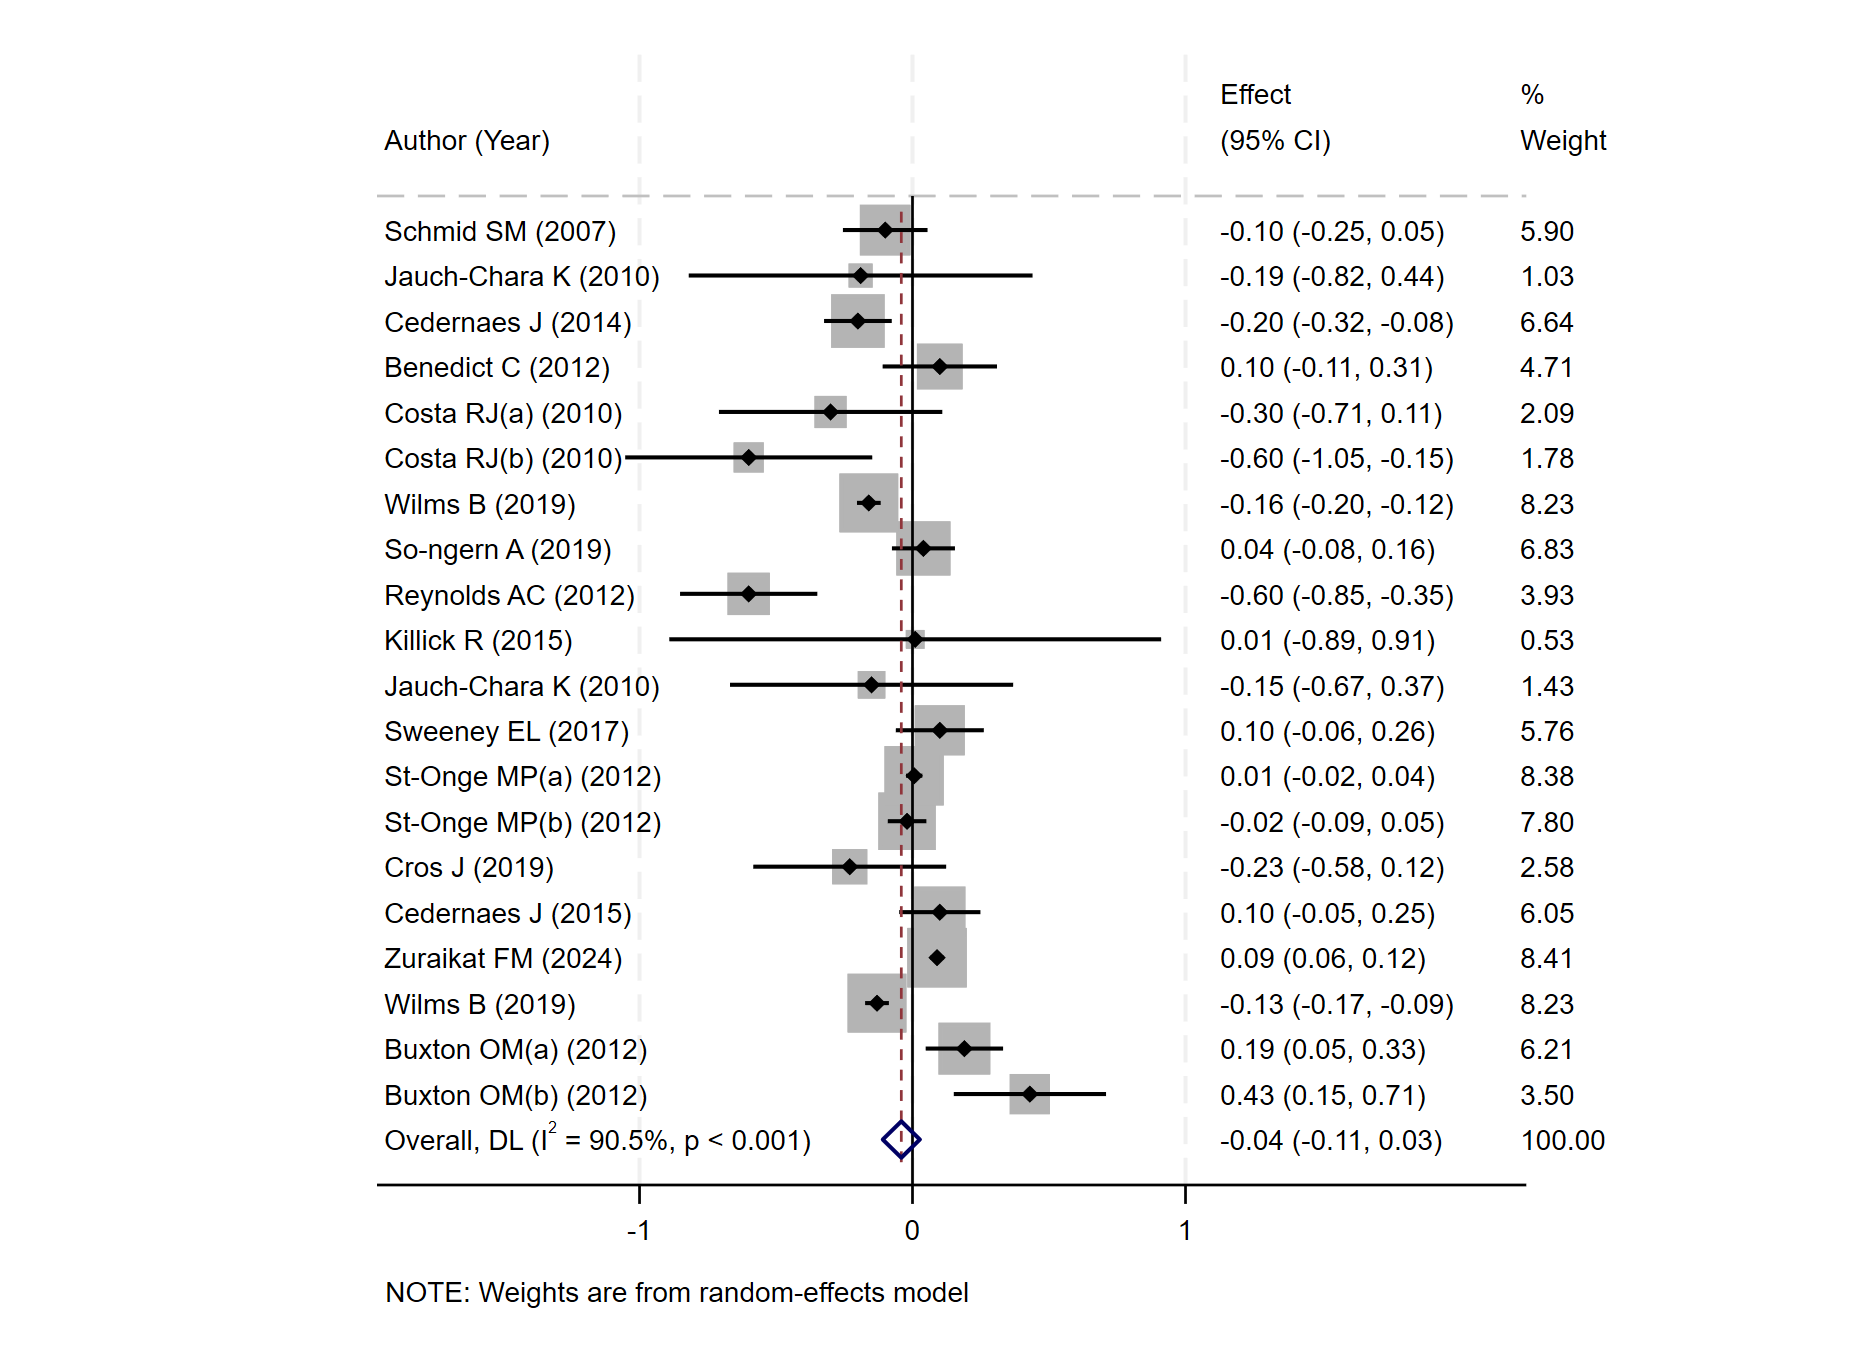


- - 1. Funnel plot


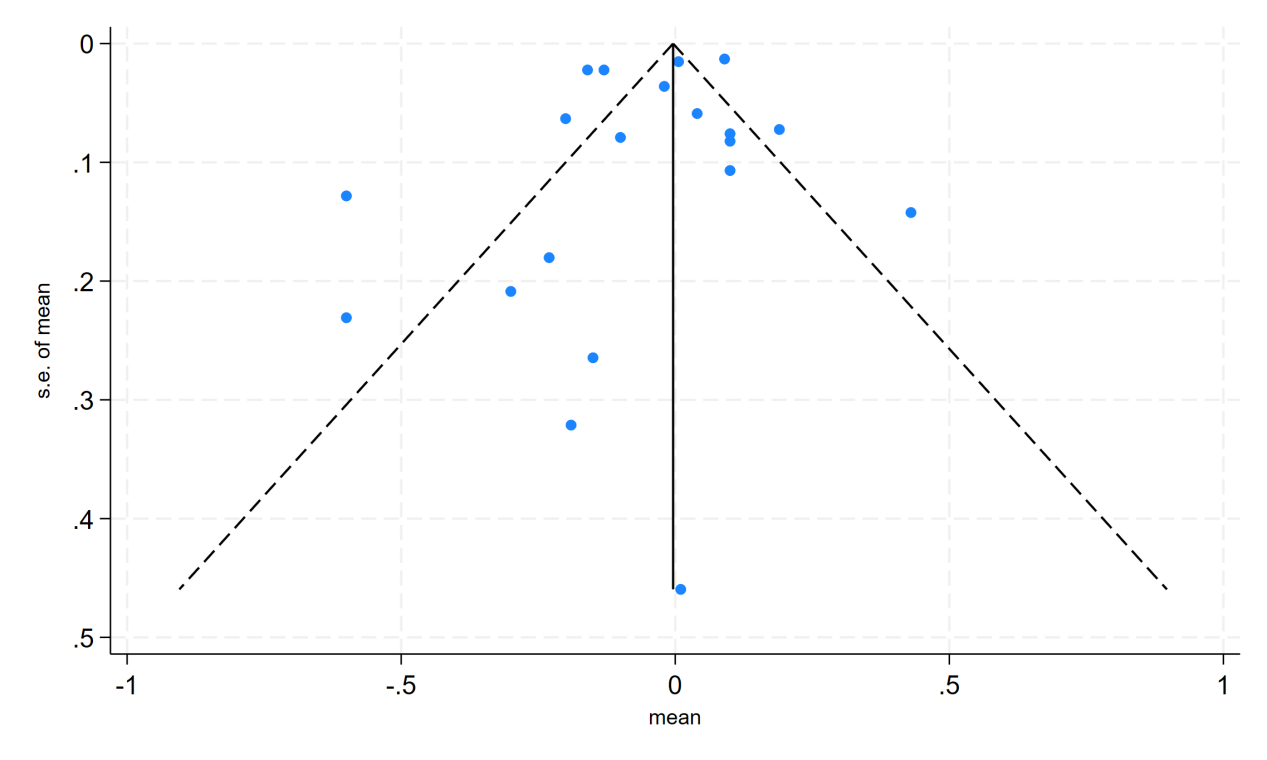


- 1. Fasting insulin
     1. Forest plot


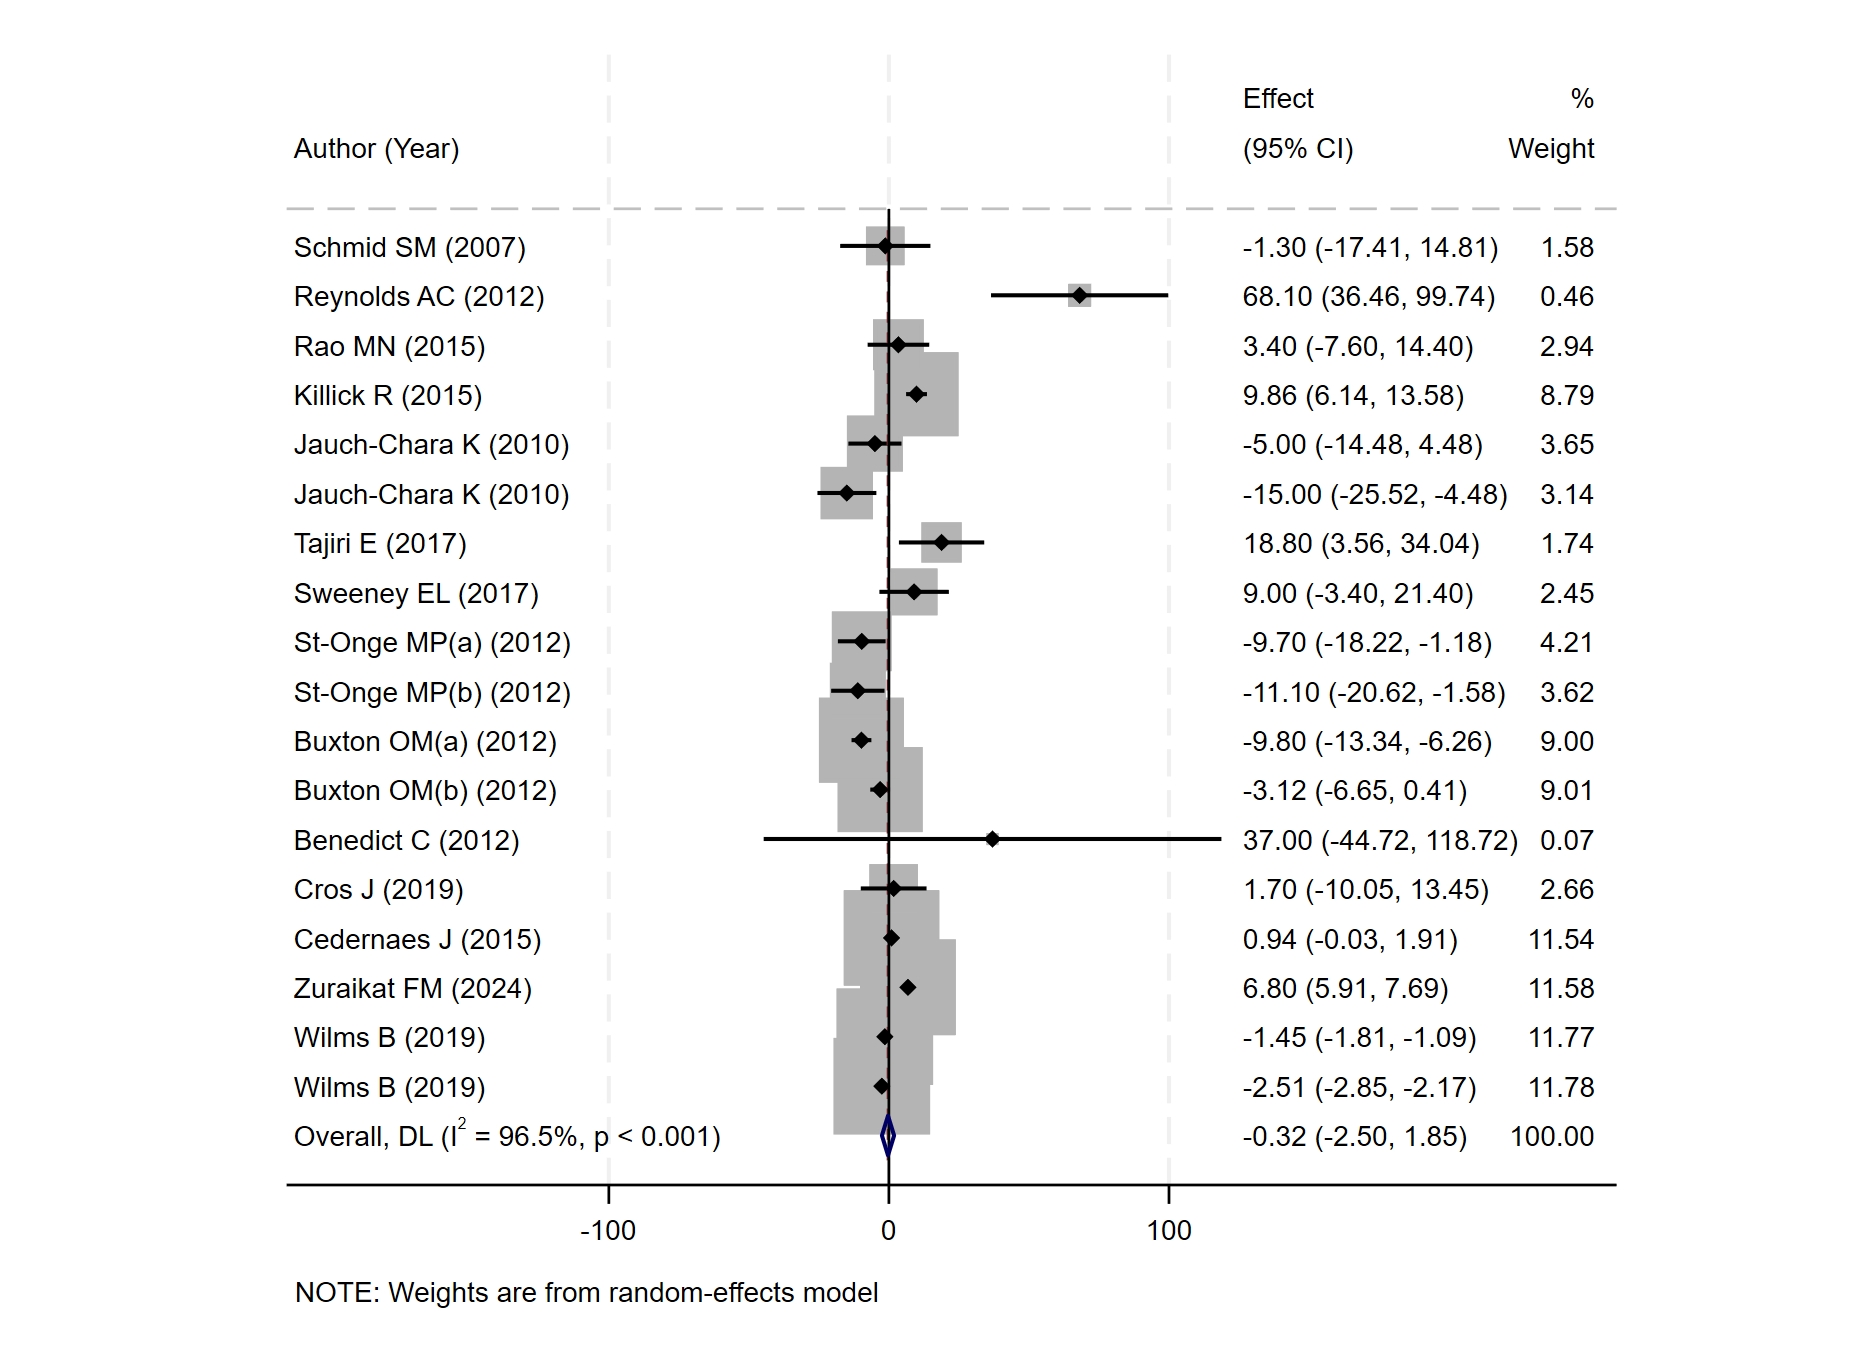


- - 1. Funnel plot


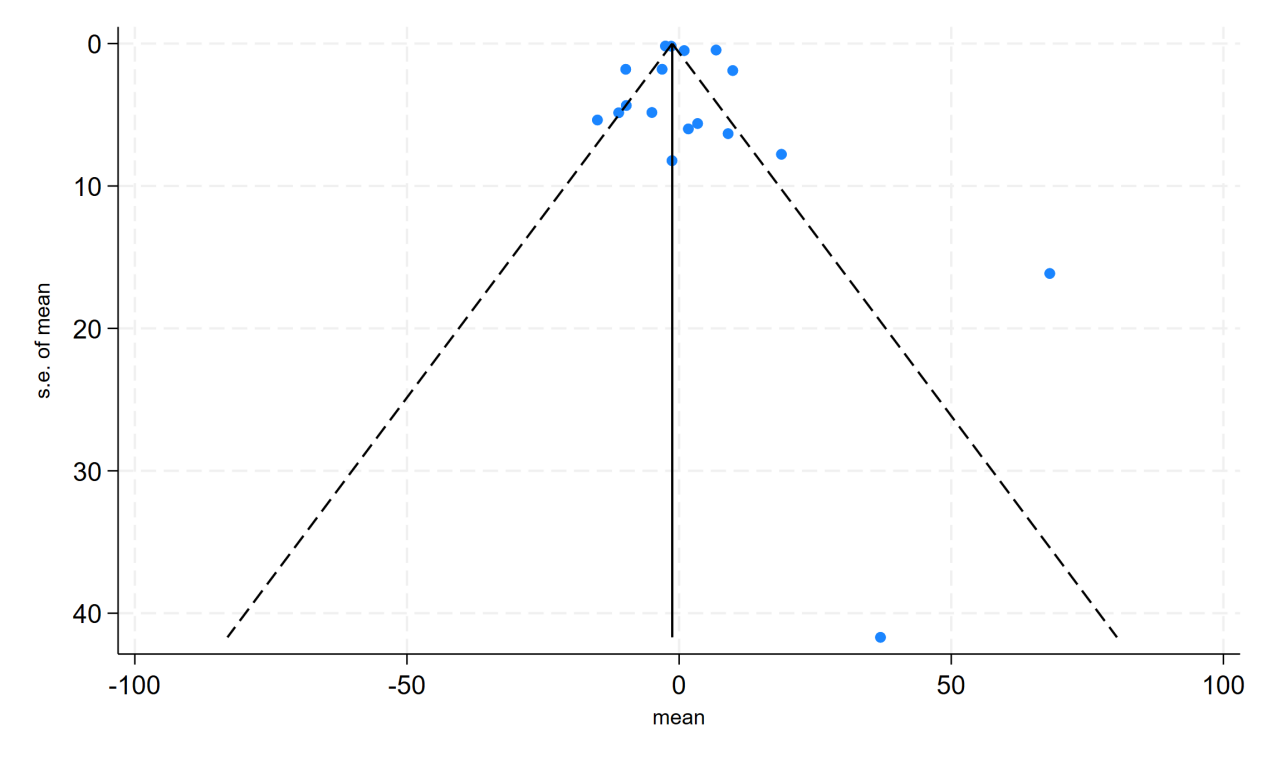


- 1. LDL
     1. Forest plot


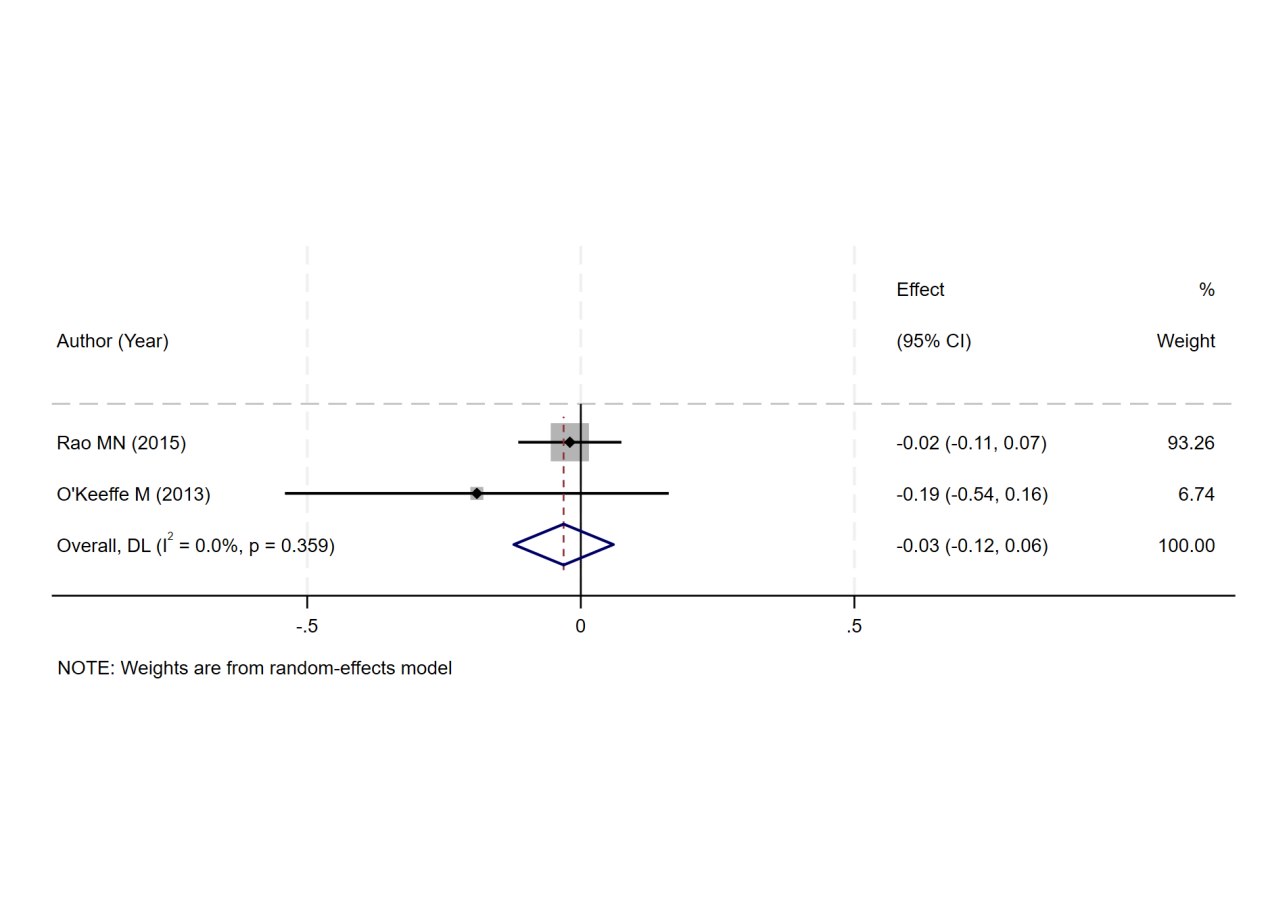


- - 1. Funnel plot


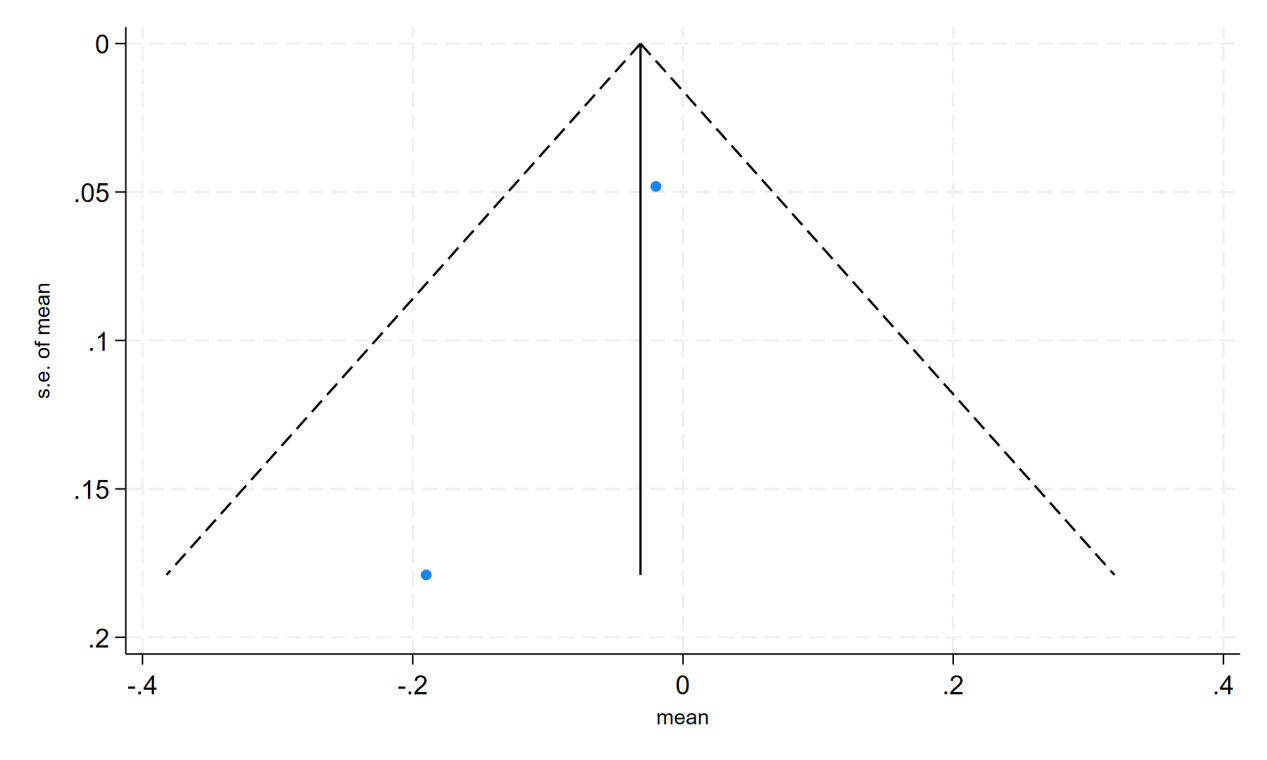


- 1. HDL
     1. Forest plot


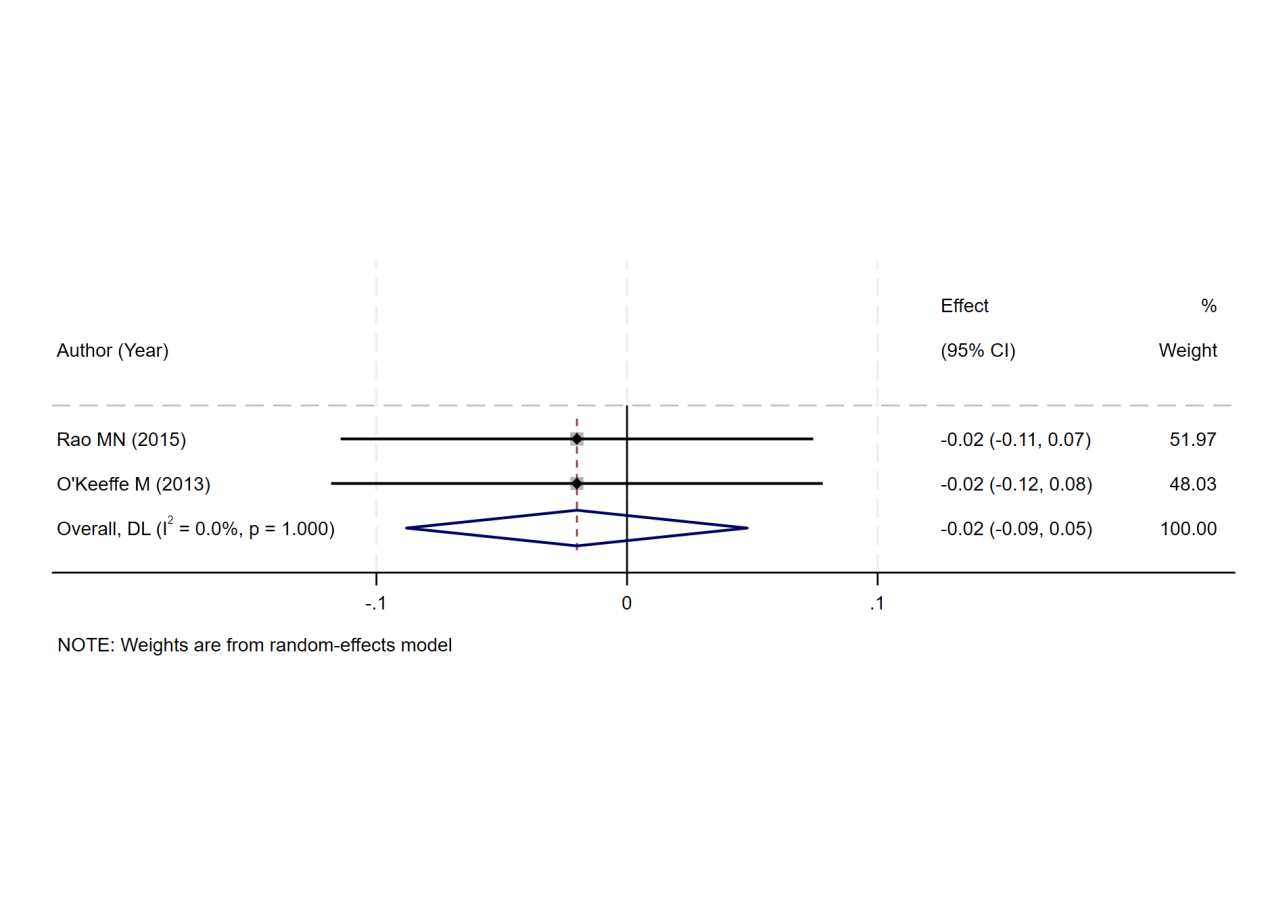


- - 1. Funnel plot


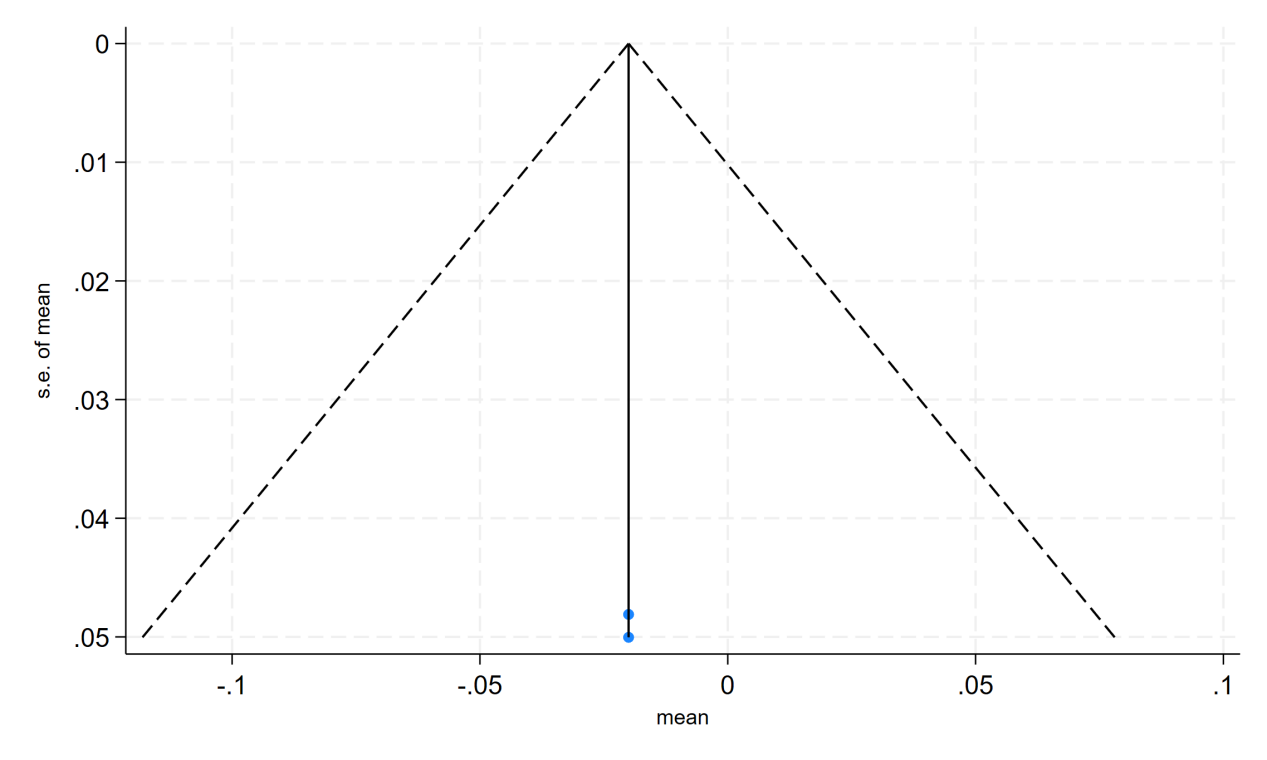


- 1. Total cholesterol
     1. Forest plot


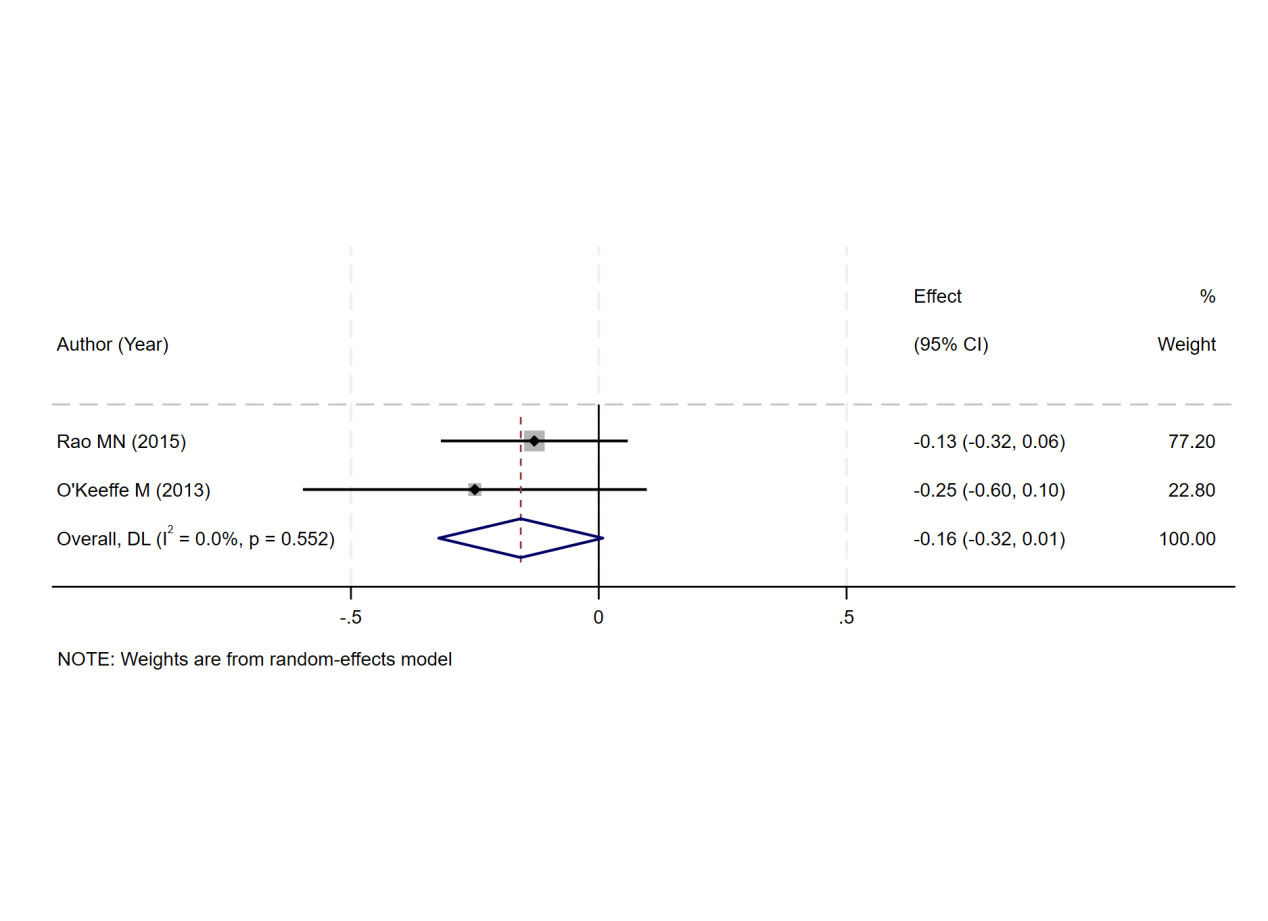


- - 1. Funnel plot


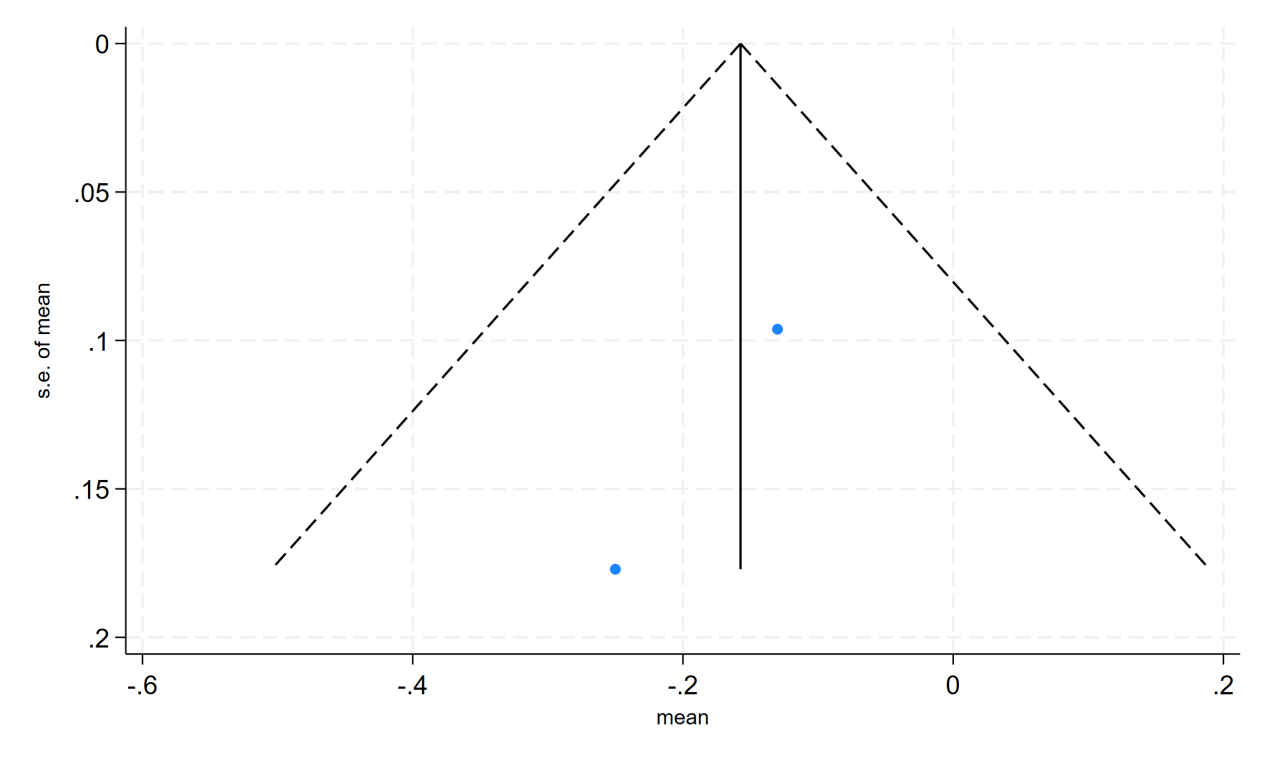


- 1. Total triglycerides
     1. Forest plot


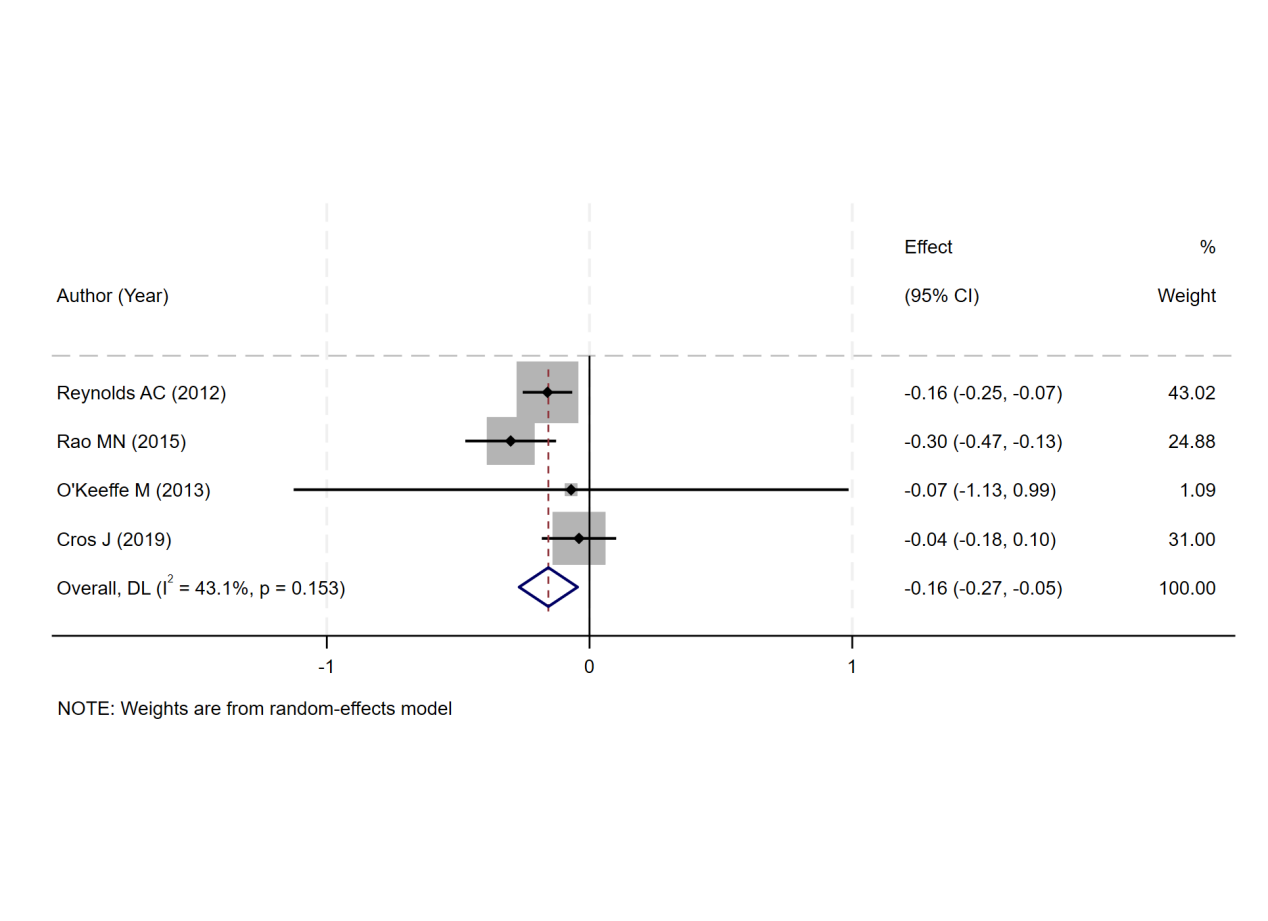


- - 1. Funnel plot


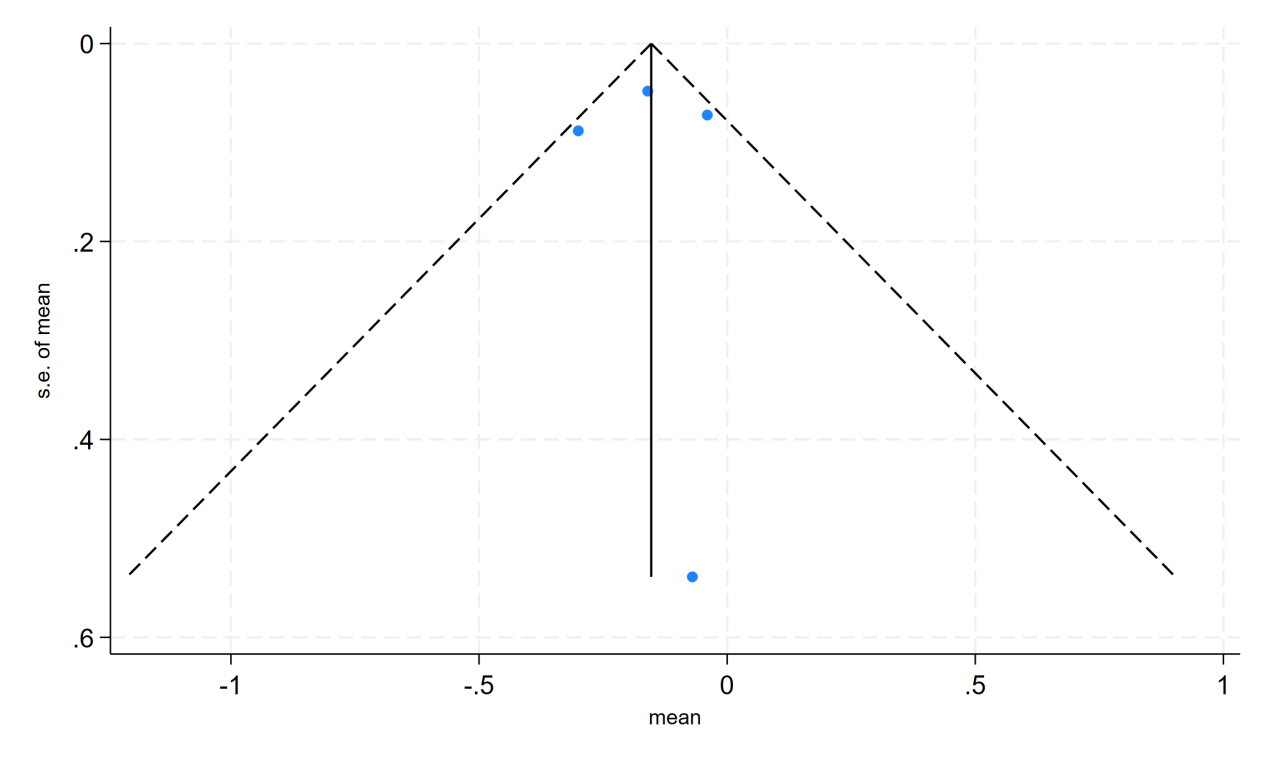


- 1. Fasting ghrelin
     1. Forest plot


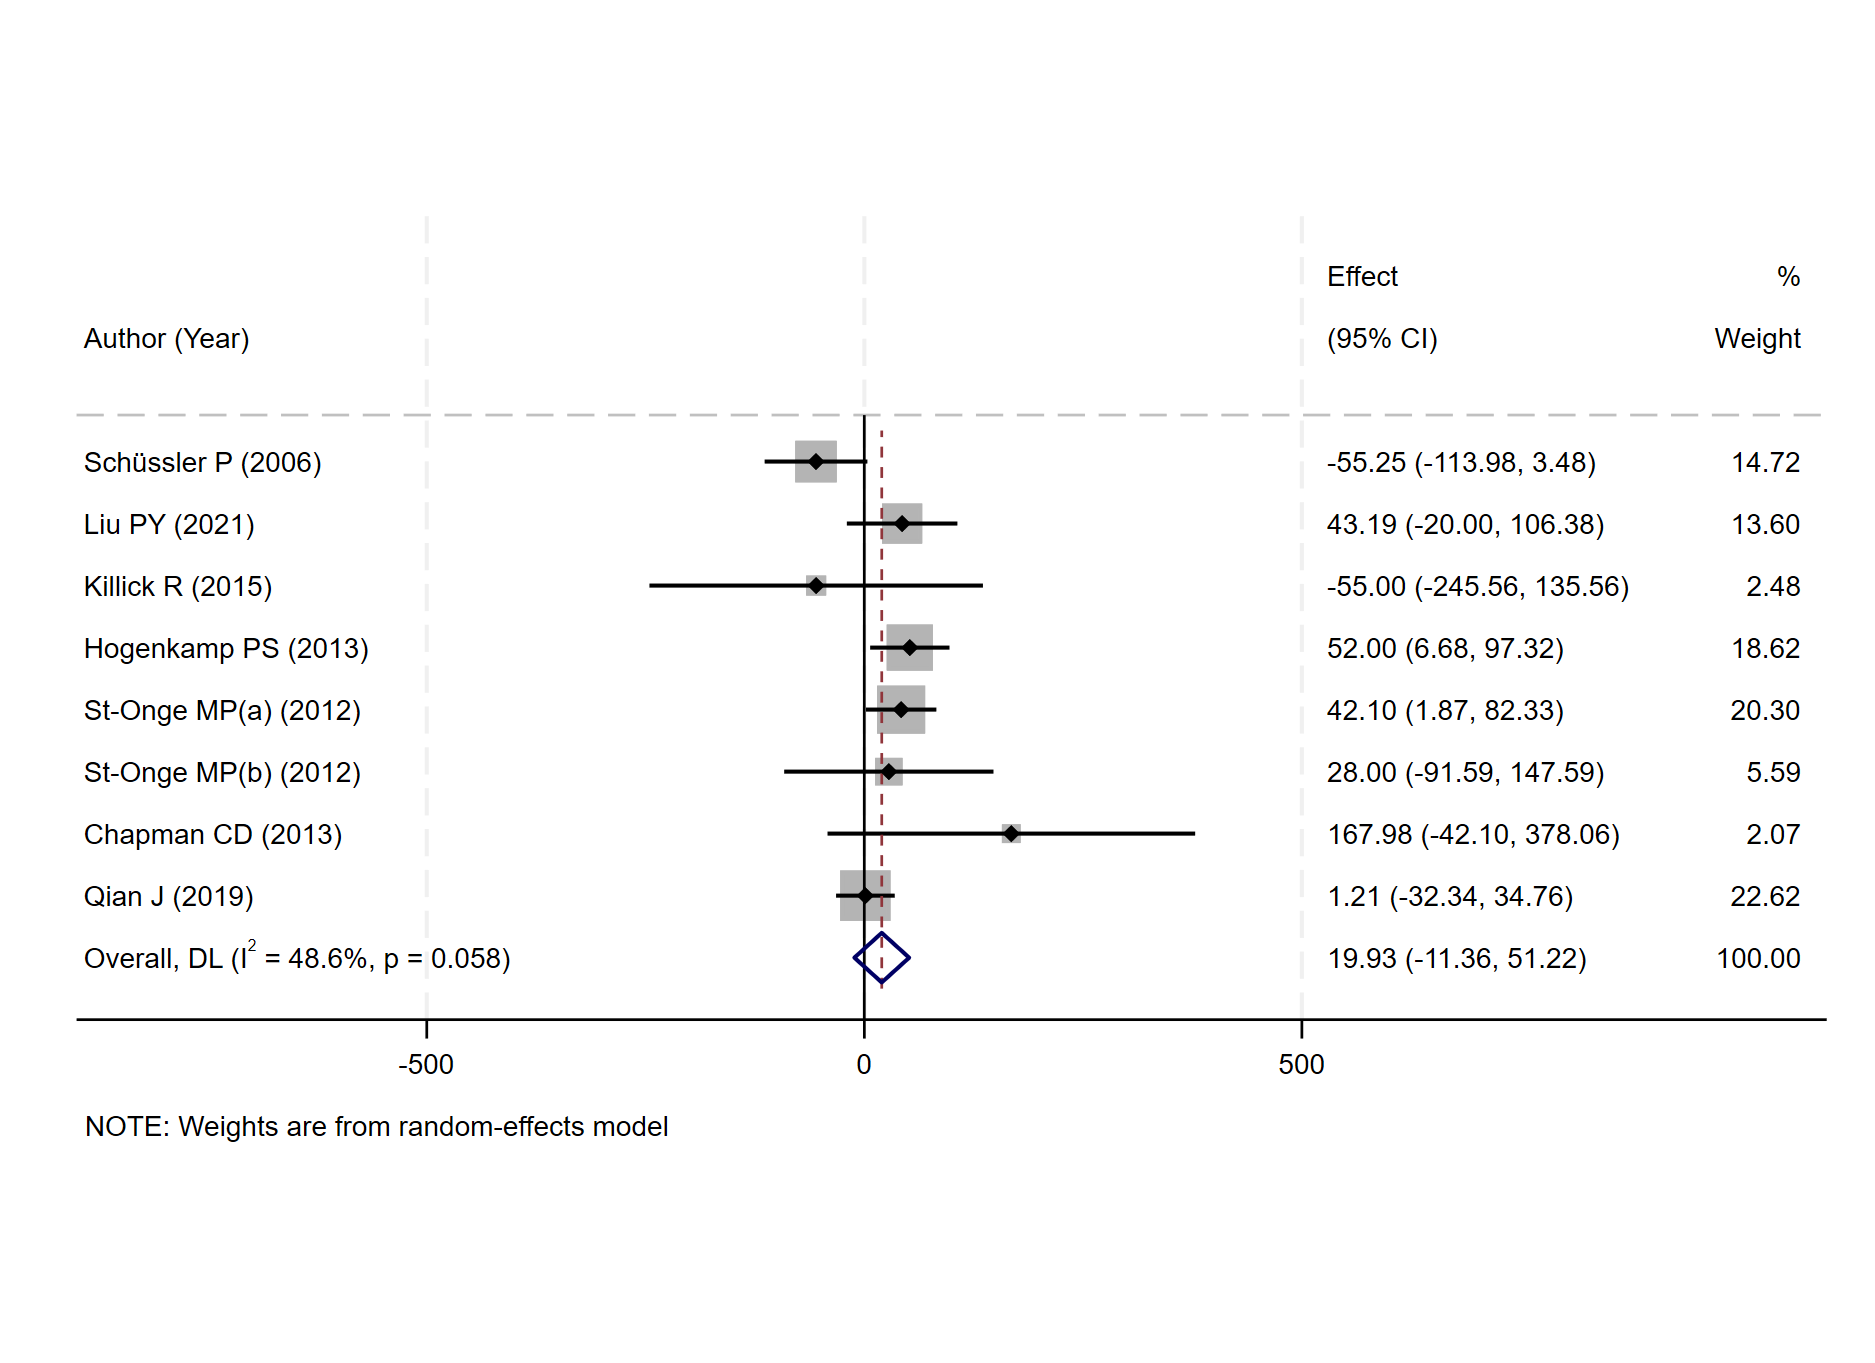


- - 1. Funnel plot


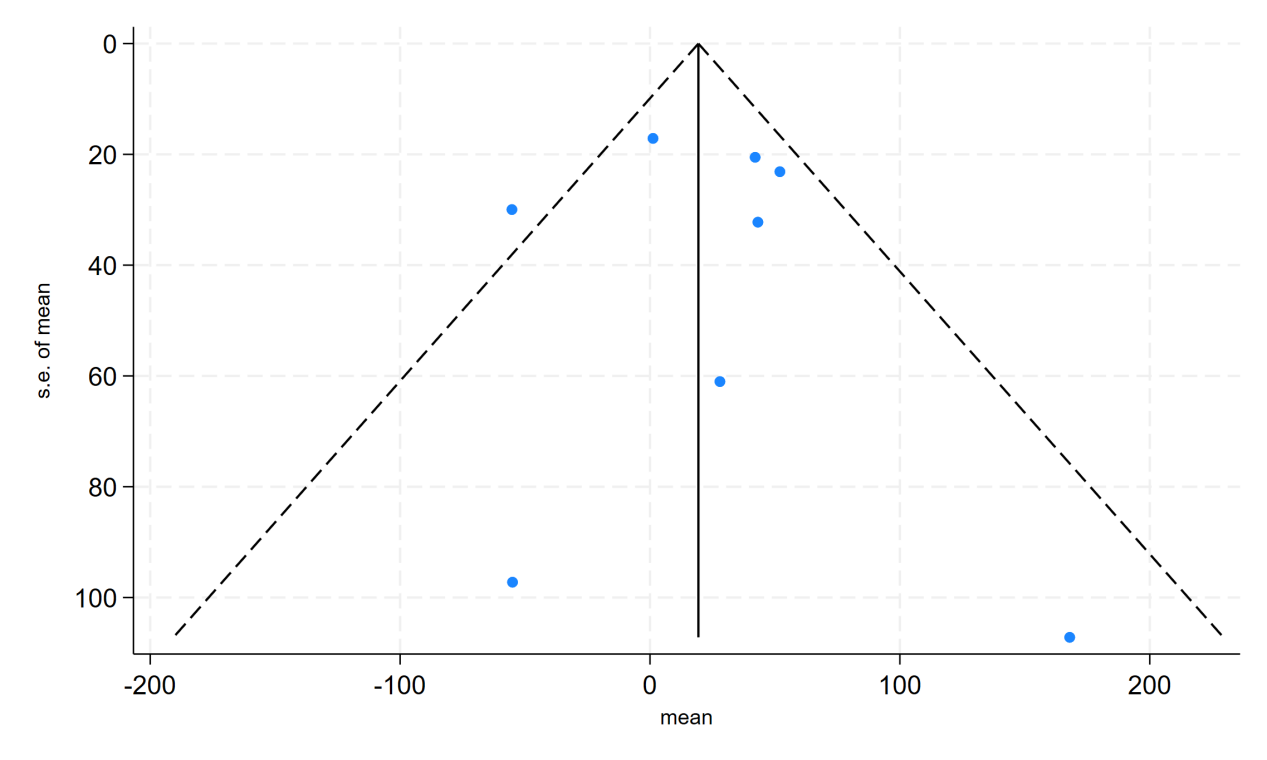


- 1. Fasting leptin
     1. Forest plot


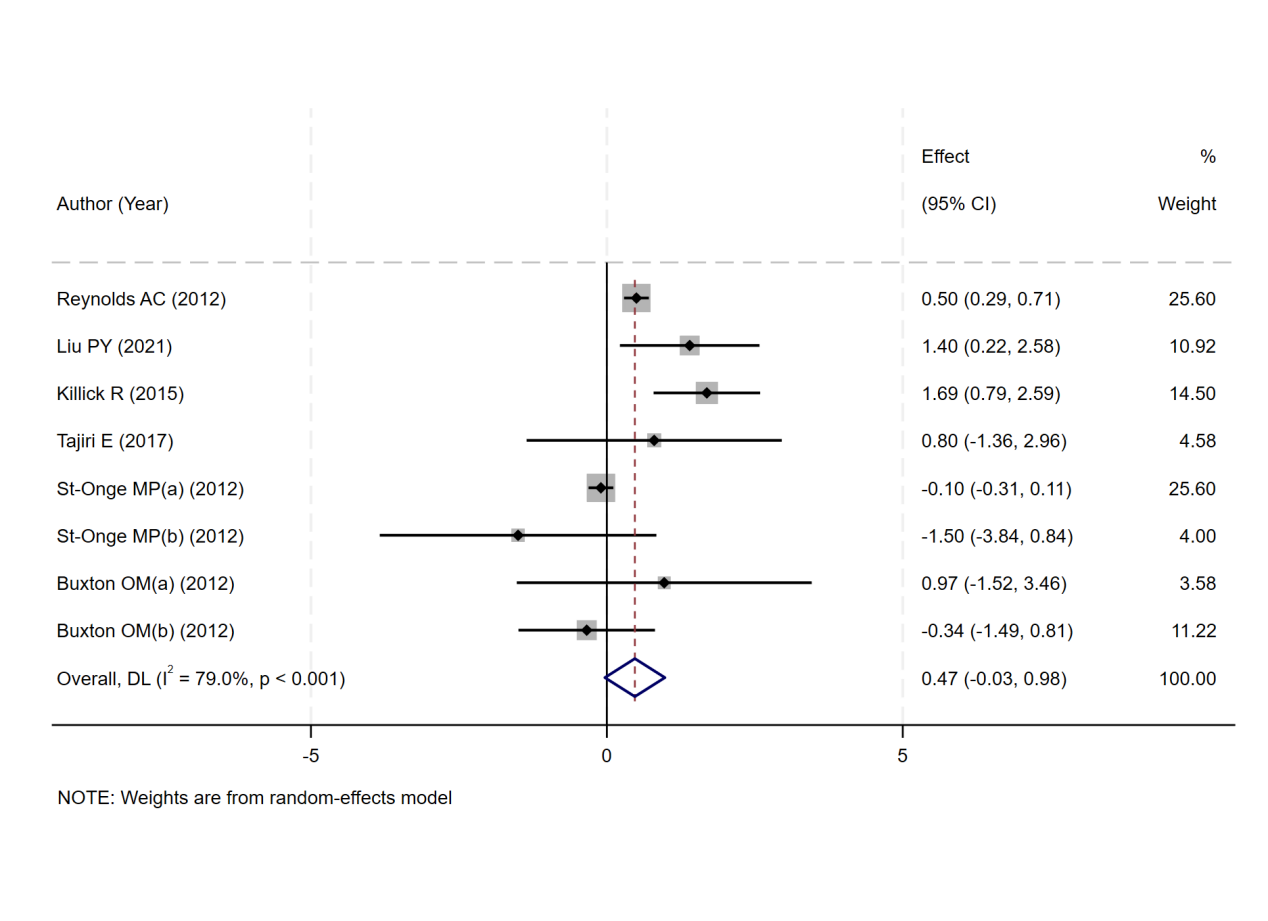


- - 1. Funnel plot


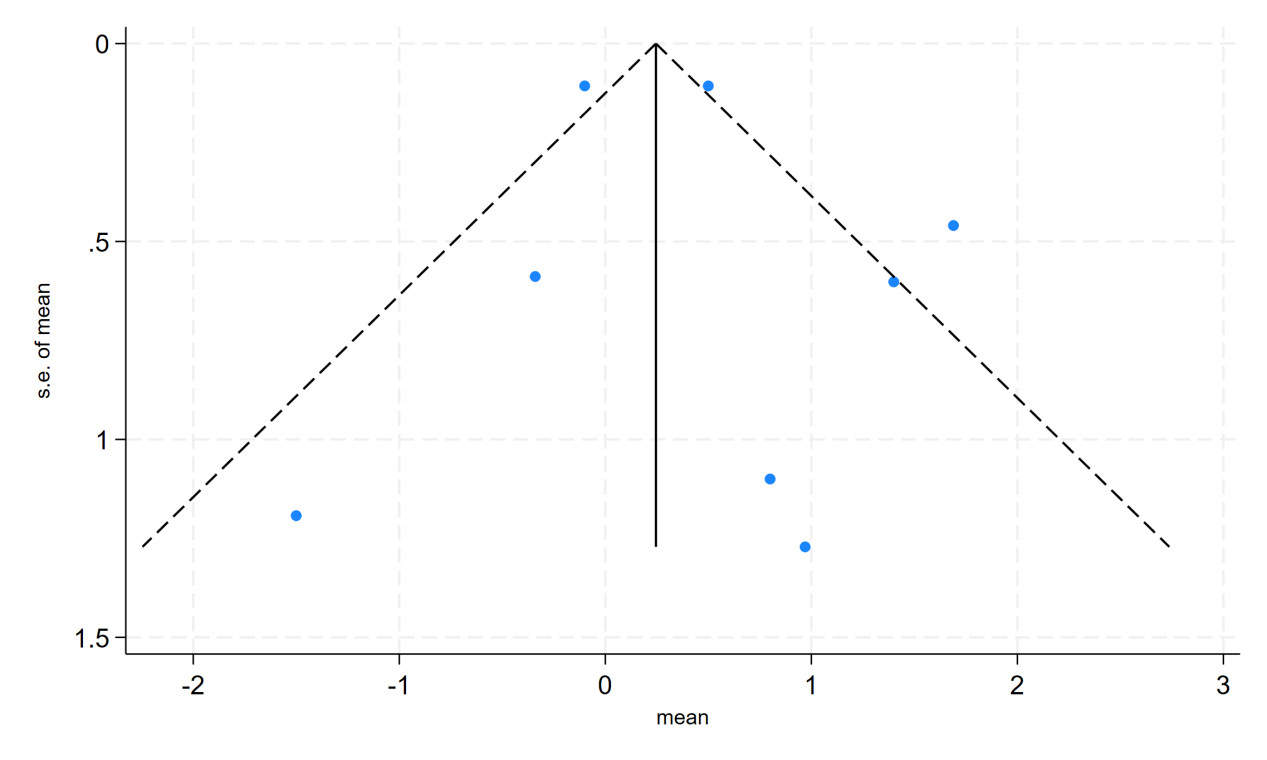


- 1. 24h average leptin
     1. Forest plot


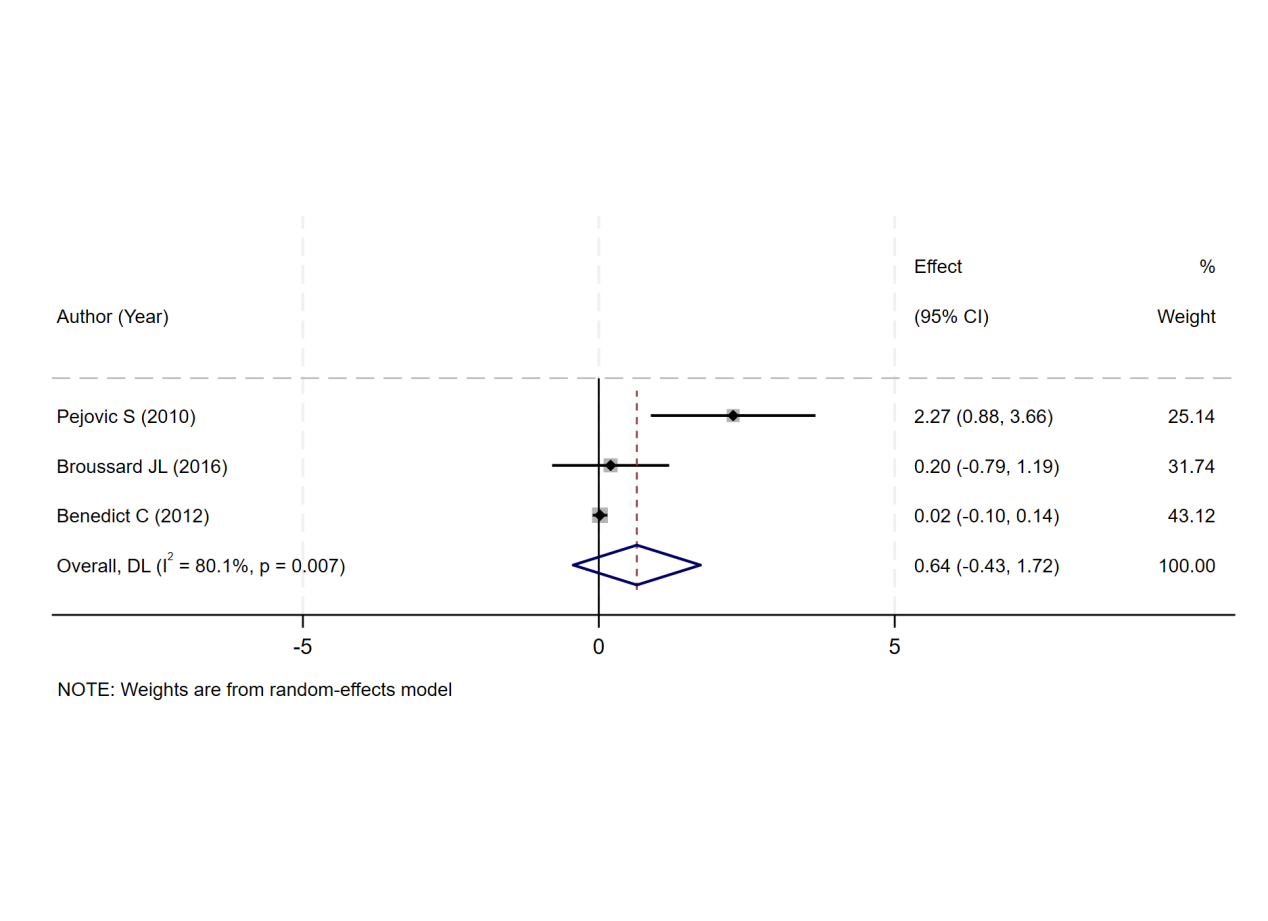


- - 1. Funnel plot


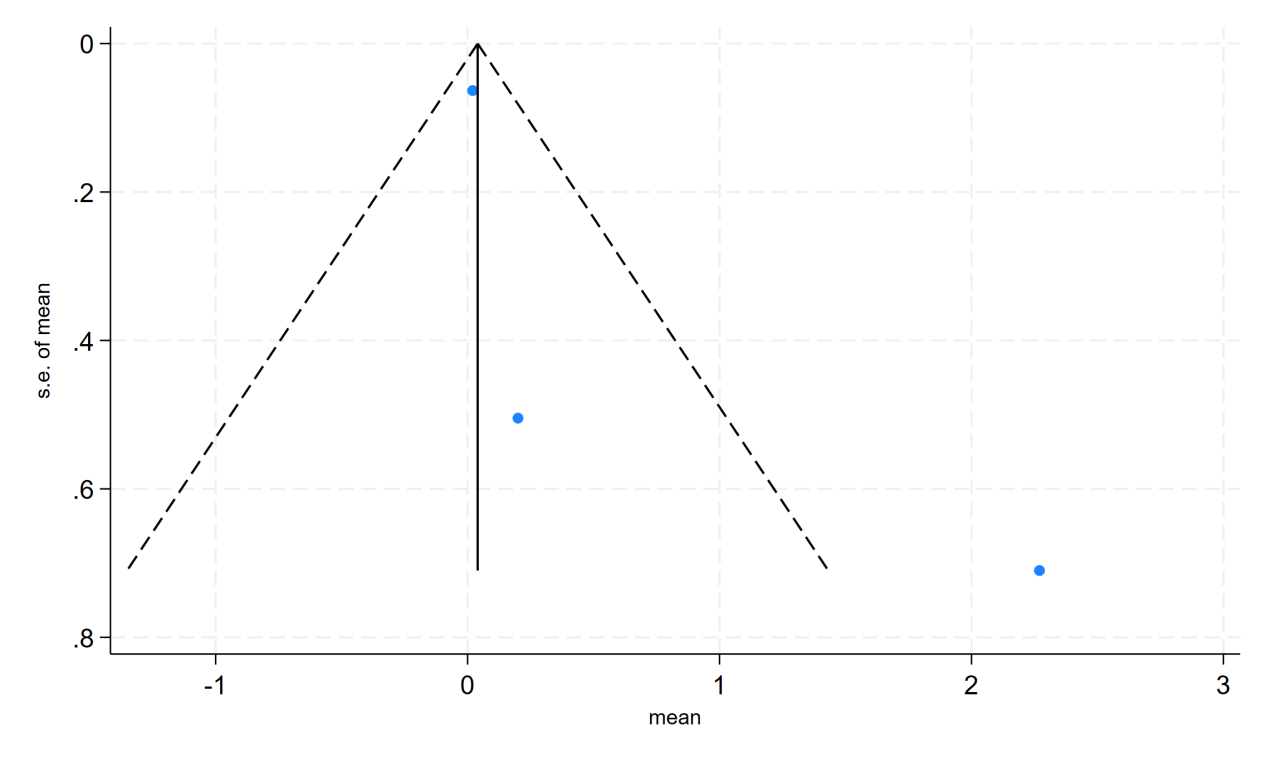


- 1. Fasting cortisol
     1. Forest plot


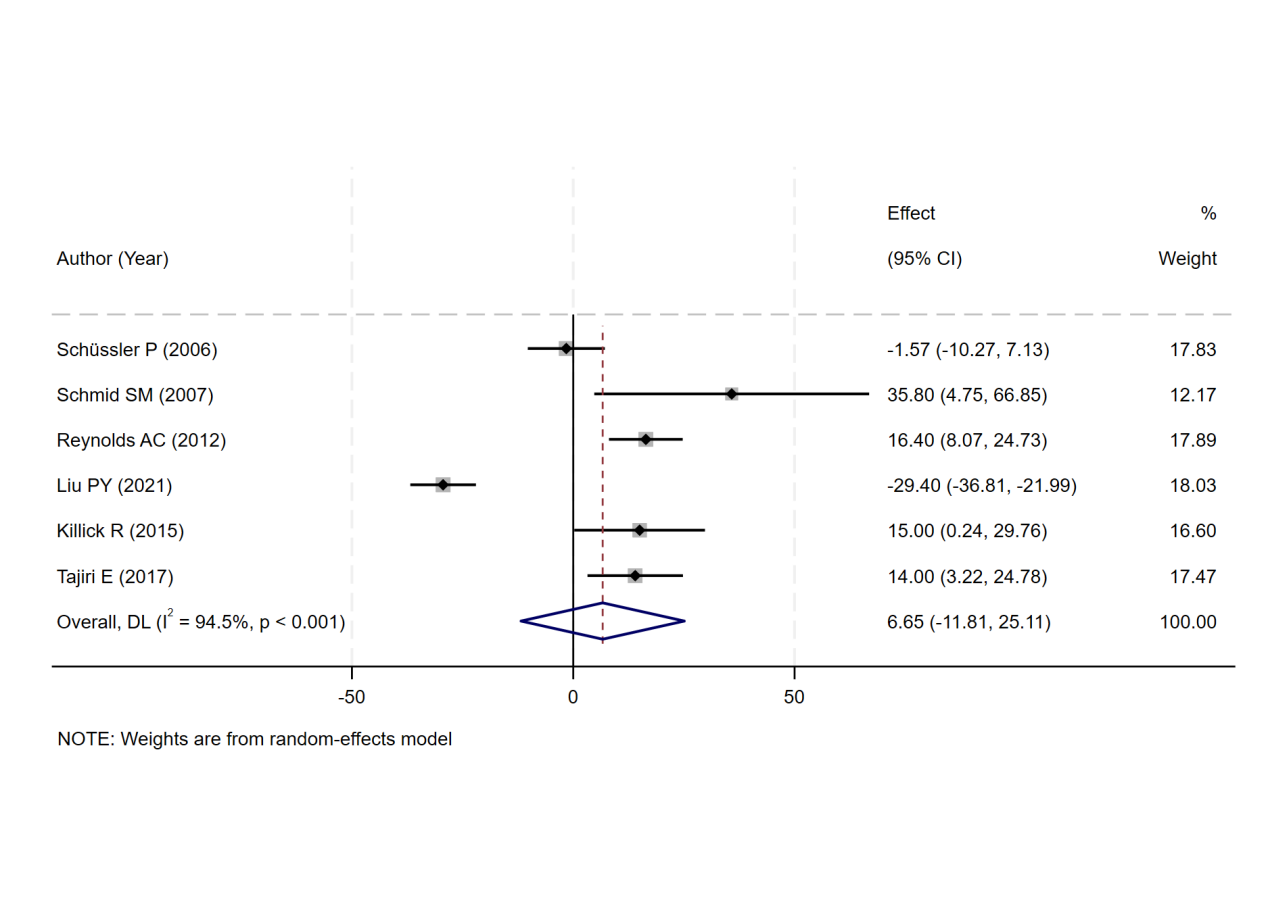


- - 1. Funnel plot


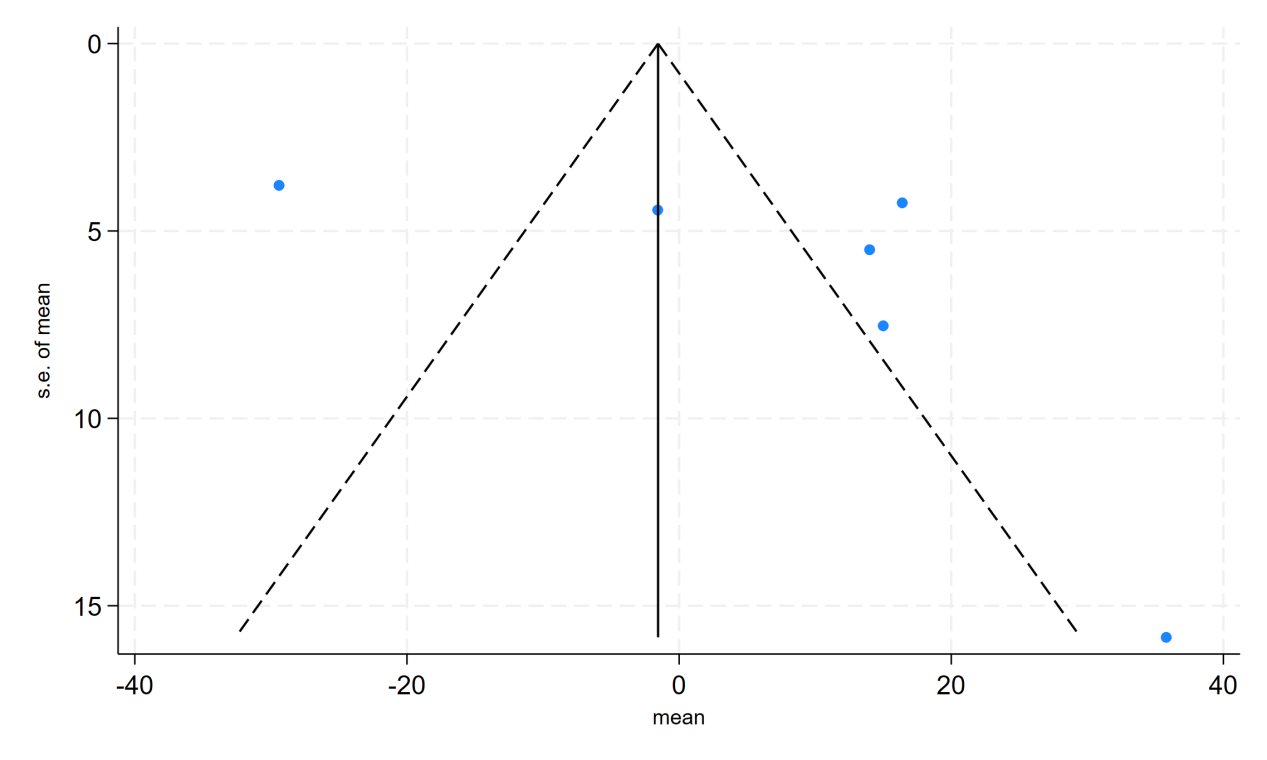


- 1. 24h average cortisol
     1. Forest plot


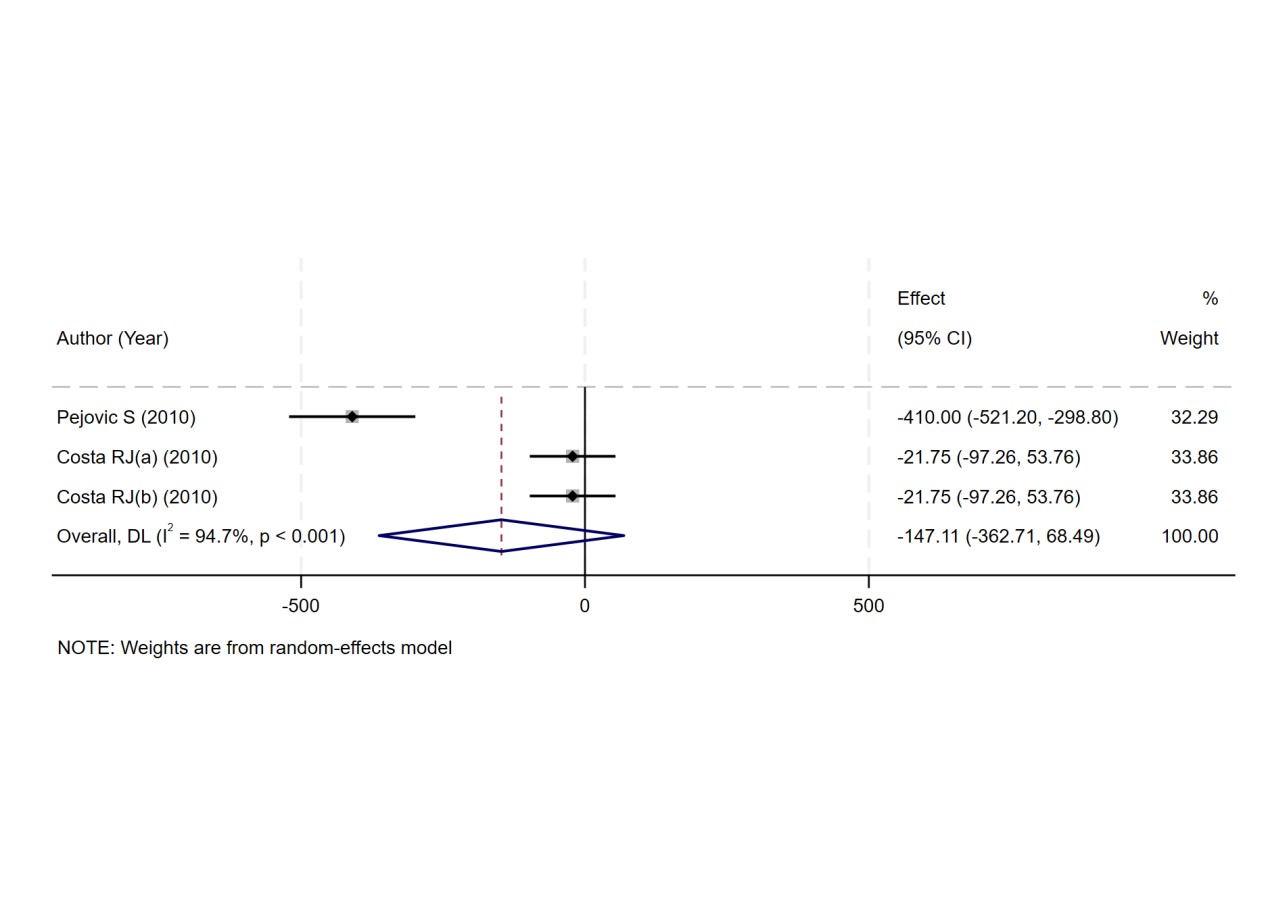


- - 1. Funnel plot


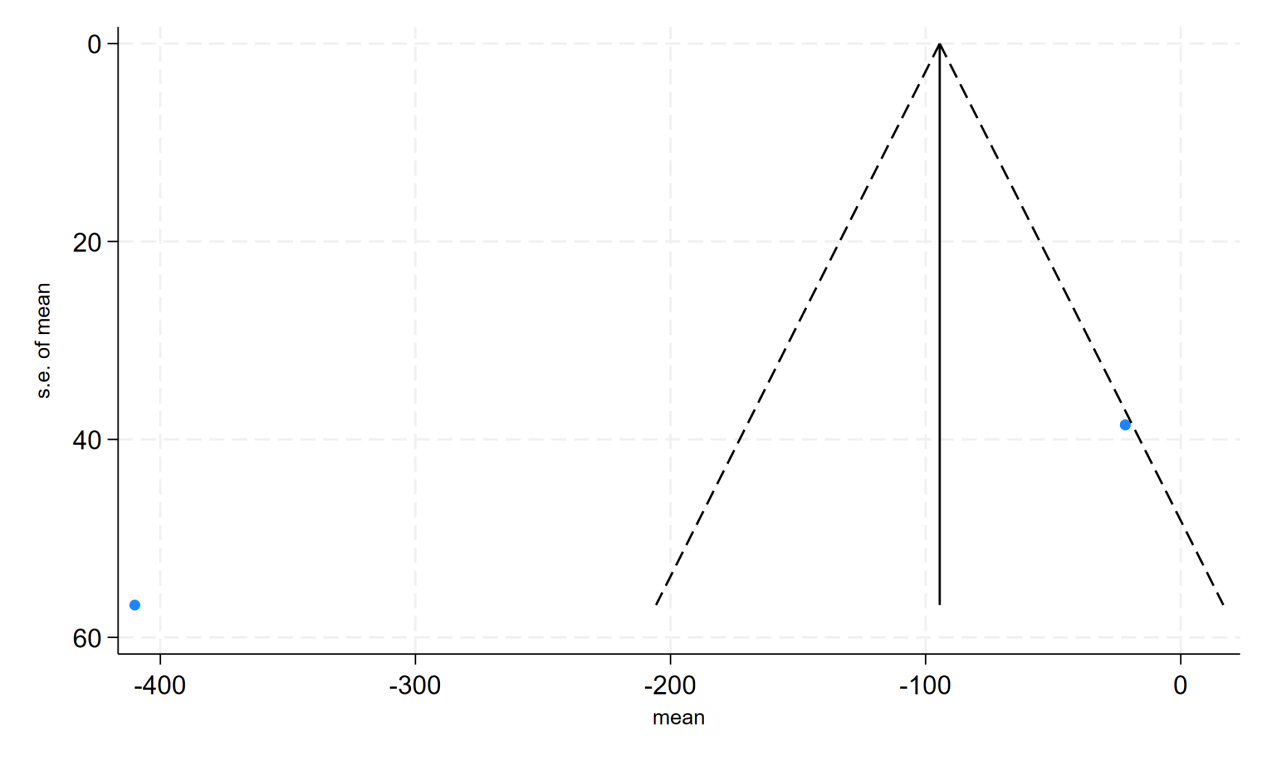

Supplement: Supplementary file 2 [file 561d0e8fbc52e442f4f9841c.doc]
