# Supplementary material
Source: Research Square preprint supplement (doi:10.21203/rs.3.rs-9056648/v1)
Supplement: Supplementary file 1 [file 1193dc0c4c3313f6922f3393.doc]

**Supplementary Appendix 4**

**Additional Tables of Three Panels of General Analyses**

Abbreviations: TC: total cholesterol; HDL: high density lipoprotein cholesterol; LDL: low density lipoprotein cholesterol; TG: total triglyceride; HbA1c: hemoglobin A1c; BMI: body mass index; CI: credible interval.

NOTE:

1. Case-control designed studies
   1. Weight

A: Control; B: OSA; C: Sleep restriction.

- - 1. Multivariate meta-analysis results

|  | Coef. | Std. Err. | z | *P* > |z| | 95% CI | |
| --- | --- | --- | --- | --- | --- | --- |
| _y_B _cons | 0.12 | 0.47 | 0.25 | 0.81 | -0.81 | 1.04 |
| _y_C _cons | 0.25 | 0.28 | 0.92 | 0.36 | -0.29 | 0.80 |

- - 1. Estimated between-studies SDs and correlation matrix

|  | SD | _y_B | _y_C |
| --- | --- | --- | --- |
| _y_B | 1.524e-13 | 1 | . |
| _y_C | 1.524e-13 | 0.5 | 1 |

- - 1. Estimated probabilities (%) of each treatment having each rank

NOTE: (1) Assuming the maximum parameter is the best; (2) Using 10000 draws; (3) Allowing for parameter uncertainty.

| Rank | Control | OSA | Sleep restriction |
| --- | --- | --- | --- |
| Best | 6.9 | 38.4 | 54.7 |
| 2nd | 43.4 | 23.7 | 32.9 |
| Worst | 49.6 | 37.9 | 12.5 |

- - 1. Consistency evaluation by node splitting

Node splitting not applicable for the limited number of eligible studies.

- - 1. Result of planned meta-analysis using random effects model

| Study | SMD | 95% Confident Interval | | % Weight |
| --- | --- | --- | --- | --- |
| Robertson MD, sleep restriction (2012) | 0.56 | -0.36 | 1.48 | 26.02 |
| Spaeth AM, sleep restriction (2015) | 0.11 | -0.57 | 0.78 | 48.24 |
| Martin RA, OSA (2017) | 0.12 | -0.80 | 1.05 | 25.74 |
| Pooled SMD | 0.23 | -0.24 | 0.70 | 100.0 |

Heterogeneity chi-squared = 0.68 (d.f. = 2) *P* = 0.713

I2 (variation in SMD attributable to heterogeneity) = 0.0 %

Estimate of between-study variance Tau-squared = 0.00

Test of SMD = 0: z = 0.95 *P* = 0.341

- - 1. Result of planned meta-analysis using fixed effects model

| Study | SMD | 95% Confident Interval | | % Weight |
| --- | --- | --- | --- | --- |
| Robertson MD, sleep restriction (2012) | 0.56 | -0.36 | 1.48 | 26.02 |
| Spaeth AM, sleep restriction (2015) | 0.11 | -0.57 | 0.78 | 48.24 |
| Martin RA, OSA (2017) | 0.12 | -0.80 | 1.05 | 25.74 |
| Pooled SMD | 0.23 | -0.24 | 0.70 | 100.0 |

Heterogeneity chi-squared = 0.68 (d.f. = 2) *P* = 0.71

I2 (variation in SMD attributable to heterogeneity) = 0.0 %

Test of SMD = 0: z = 0.95 *P* = 0.34

- - 1. Result of Egger’s test (publication bias)

| Std_Eff | Coefficient | Std. err. | t | *P* > |t| | [95% conf. interval] | |
| --- | --- | --- | --- | --- | --- | --- |
| slope | -0.53 | 1.05 | -0.50 | 0.704 | -13.85 | 12.79 |
| bias | 1.84 | 2.53 | 0.73 | 0.600 | -30.28 | 33.96 |

Test of H0: no small-study effects *P* = 0.600

- - 1. Result of influence analysis

| Study omitted | Estimate | 95% Confident Interval | |
| --- | --- | --- | --- |
| Robertson MD, sleep restriction (2012) | 0.11 | -0.43 | 0.66 |
| Spaeth AM, sleep restriction (2015) | 0.34 | -0.31 | 0.99 |
| Martin RA, OSA (2017) | 0.26 | -10.28 | 0.81 |
| Combined | 0.23 | -0.24 | 0.70 |

- 1. BMI

A: Circadian shift; B: Control; C: Idiopathic hypersomnia; D: Narcolepsy; E: OSA; F: Sleep extension.

- - 1. Multivariate meta-analysis results

|  | Coef. | Std. Err. | z | *P* > |z| | 95% CI | |
| --- | --- | --- | --- | --- | --- | --- |
| _y_B _cons | 0.04 | 0.25 | 0.16 | 0.88 | -0.46 | 0.54 |
| _y_C _cons | -0.43 | 0.48 | -0.89 | 0.37 | -1.36 | 0.51 |
| _y_D _cons | 0.34 | 0.38 | 0.89 | 0.38 | -0.41 | 1.08 |
| _y_E _cons | 0.62 | 0.28 | 2.22 | 0.03 | 0.07 | 1.18 |
| _y_F _cons | 0.20 | 0.47 | 0.42 | 0.67 | -0.73 | 1.13 |

- - 1. Estimated between-studies SDs and correlation matrix

|  | SD | _y_B | _y_C | _y_D | _y_E | _y_F |
| --- | --- | --- | --- | --- | --- | --- |
| _y_B | 0.24 | 1 | . | . | . | . |
| _y_C | 0.24 | 0.5 | 1 | . | . | . |
| _y_D | 0.24 | 0.5 | 0.5 | 1 | . | . |
| _y_E | 0.24 | 0.5 | 0.5 | 0.5 | 1 | . |
| _y_F | 0.24 | 0.5 | 0.5 | 0.5 | 0.5 | 1 |

- - 1. Estimated probabilities (%) of each treatment having each rank

NOTE: (1) Assuming the maximum parameter is the best; (2) Using 10000 draws; (3) Allowing for parameter uncertainty.

| Rank | Circadian shift | Control | Idiopathic hypersomn | Narcolepsy | OSA | Sleep extension |
| --- | --- | --- | --- | --- | --- | --- |
| Best | 0.9 | 0.0 | 0.3 | 15.4 | 69.9 | 13.5 |
| 2nd | 8.8 | 3.0 | 1.3 | 39.1 | 26.0 | 21.9 |
| 3rd | 19.9 | 22.0 | 4.7 | 25.8 | 4.0 | 23.6 |
| 4th | 23.7 | 44.3 | 7.1 | 11.3 | 0.1 | 13.4 |
| 5th | 33.3 | 27.1 | 14.0 | 7.5 | 0.0 | 18.1 |
| Worst | 13.4 | 3.6 | 72.7 | 0.8 | 0.0 | 9.4 |

- - 1. Consistency evaluation by node splitting

* All the evidence about these contrasts comes from the trials which directly compare them.

|  | Direct | | Indirect | | Difference | | | |
| --- | --- | --- | --- | --- | --- | --- | --- | --- |
| Side | Coef. | Std. Err. | Coef. | Std. Err. | Coef. | Std. Err. | *P* > |z| | tau |
| A B * | 0.04 | 0.25 | -0.24 | 9.13 | 0.28 | 9.13 | 0.98 | 0.24 |
| B C * | -0.41 | 0.45 | -0.88 | 1.15 | 0.47 | 1.22 | 0.70 | 0.28 |
| B D * | 0.30 | 0.28 | 0.57 | 44.73 | 0.24 | 44.73 | 1.00 | 0.24 |
| B E * | 0.58 | 0.12 | -0.08 | 21.10 | 0.67 | 21.10 | 0.98 | 0.24 |
| B F * | 0.16 | 0.40 | -0.07 | 63.24 | 0.23 | 63.25 | 1.00 | 0.24 |
| C D * | 0.82 | 0.45 | 0.34 | 1.16 | 0.47 | 1.22 | 0.70 | 0.28 |

- - 1. Result of planned meta-analysis using random effects model

| Study | SMD | 95% Confident Interval | | % Weight |
| --- | --- | --- | --- | --- |
| Vgontzas AN, OSA (2000) | 2.58 | 1.52 | 3.64 | 3.39 |
| Terzi R, OSA (2015) | 0.88 | 0.29 | 1.47 | 6.65 |
| Rizzi CF, OSA (2009) | 0.05 | -0.49 | 0.58 | 7.25 |
| Bermingham KM, circadian shift (2023) | -0.04 | -0.22 | 0.14 | 11.04 |
| Beitinger PA, narcolepsy (2012) | 0.18 | -0.50 | 0.85 | 5.90 |
| Al Khatib HK, sleep extension (2018) | 0.16 | -0.47 | 0.79 | 6.29 |
| Sforza E, OSA (2011) | 0.38 | 0.22 | 0.54 | 11.19 |
| Cintra F, OSA (2010) | 0.68 | 0.35 | 1.01 | 9.53 |
| van Holst RJ, narcolepsy (2016) | 0.42 | -0.28 | 1.12 | 5.67 |
| van Holst RJ, idiopathic hypersomnia (2016) | -0.40 | -1.31 | 0.52 | 4.14 |
| Tseng PH, OSA (2017) | 0.78 | 0.38 | 1.17 | 8.81 |
| Martin RA, OSA (2017) | 0.19 | -0.74 | 1.11 | 4.08 |
| Kritikou I, OSA (2013) | 0.67 | 0.21 | 1.13 | 8.06 |
| Kritikou I, OSA (2016) | 0.36 | -0.11 | 0.83 | 7.98 |
| Pooled SMD | 0.44 | 0.21 | 0.67 | 100.0 |

Heterogeneity chi-squared = 53.13 (d.f. = 13) *P* = 0.000

I2 (variation in SMD attributable to heterogeneity) = 75.5%

Estimate of between-study variance Tau-squared = 0.12

Test of SMD = 0: z = 3.72 *P* = 0.00

- - 1. Result of planned meta-analysis using fixed effects model

| Study | SMD | 95% Confident Interval | | % Weight |
| --- | --- | --- | --- | --- |
| Vgontzas AN, OSA (2000) | 2.58 | 1.52 | 3.64 | 0.78 |
| Terzi R, OSA (2015) | 0.88 | 0.29 | 1.47 | 2.51 |
| Rizzi CF, OSA (2009) | 0.05 | -0.49 | 0.58 | 3.10 |
| Bermingham KM, circadian shift (2023) | -0.04 | -0.22 | 0.14 | 28.12 |
| Beitinger PA, narcolepsy (2012) | 0.18 | -0.50 | 0.85 | 1.94 |
| Al Khatib HK, sleep extension (2018) | 0.16 | -0.47 | 0.79 | 2.22 |
| Sforza E, OSA (2011) | 0.38 | 0.22 | 0.54 | 35.33 |
| Cintra F, OSA (2010) | 0.68 | 0.35 | 1.01 | 8.14 |
| van Holst RJ, narcolepsy (2016) | 0.42 | -0.28 | 1.12 | 1.80 |
| van Holst RJ, idiopathic hypersomnia (2016) | -0.40 | -1.31 | 0.52 | 1.05 |
| Tseng PH, OSA (2017) | 0.78 | 0.38 | 1.17 | 5.73 |
| Martin RA, OSA (2017) | 0.19 | -0.74 | 1.11 | 1.03 |
| Kritikou I, OSA (2013) | 0.67 | 0.21 | 1.13 | 4.18 |
| Kritikou I, OSA (2016) | 0.36 | -0.11 | 0.83 | 4.06 |
| Pooled SMD | 0.32 | 0.23 | 0.42 | 100.0 |

Heterogeneity chi-squared = 53.13 (d.f. = 13) *P* = 0.000

I2 (variation in SMD attributable to heterogeneity) = 75.5%

Test of SMD = 0: z = 6.70 *P* = 0.00

- - 1. Result of Egger’s test (publication bias)

| Std_Eff | Coefficient | Std. err. | t | *P* > |t| | [95% conf. interval] | |
| --- | --- | --- | --- | --- | --- | --- |
| slope | 0.14 | 0.17 | 0.82 | 0.427 | -0.23 | 0.51 |
| bias | 1.22 | 0.94 | 1.29 | 0.220 | -0.84 | 3.28 |

Test of H0: no small-study effects *P* = 0.220

- - 1. Result of influence analysis

| Study omitted | Estimate | 95% Confident Interval | |
| --- | --- | --- | --- |
| Vgontzas AN, OSA (2000) | 0.30 | 0.21 | 0.40 |
| Terzi R, OSA (2015) | 0.31 | 0.21 | 0.40 |
| Rizzi CF, OSA (2009) | 0.33 | 0.23 | 0.43 |
| Bermingham KM, circadian shift (2023) | 0.46 | 0.35 | 0.57 |
| Beitinger PA, narcolepsy (2012) | 0.32 | 0.23 | 0.42 |
| Al Khatib HK, sleep extension (2018) | 0.32 | 0.23 | 0.42 |
| Sforza E, OSA (2011) | 0.29 | 0.17 | 0.41 |
| Cintra F, OSA (2010) | 0.29 | 0.19 | 0.39 |
| van Holst RJ, narcolepsy (2016) | 0.32 | 0.22 | 0.41 |
| van Holst RJ, idiopathic hypersomnia (2016) | 0.33 | 0.23 | 0.42 |
| Tseng PH, OSA (2017) | 0.29 | 0.20 | 0.39 |
| Martin RA, OSA (2017) | 0.32 | 0.23 | 0.42 |
| Kritikou I, OSA (2013) | 0.31 | 0.21 | 0.40 |
| Kritikou I, OSA (2016) | 0.32 | 0.22 | 0.42 |
| Combined | 0.32 | 0.23 | 0.42 |

- 1. Waist circumference

NOTE: Only OSA was included in the sleep disorder type, therefore network meta-analysis is not applicable.

- - 1. Result of planned meta-analysis using random effects model

| Study | SMD | 95% Confident Interval | | % Weight |
| --- | --- | --- | --- | --- |
| Terzi R, OSA (2015) | 1.07 | 0.47 | 1.68 | 21.03 |
| Rizzi CF, OSA (2009) | 0.04 | -0.50 | 0.57 | 23.56 |
| Tseng PH, OSA (2017) | 0.84 | 0.44 | 1.23 | 29.11 |
| Kritikou I, OSA (2013) | 0.76 | 0.30 | 1.22 | 26.29 |
| Pooled SMD | 0.68 | 0.28 | 1.08 | 100.0 |

Heterogeneity chi-squared = 7.94 (d.f. = 3) *P* = 0.047

I2 (variation in SMD attributable to heterogeneity) = 62.2%

Estimate of between-study variance Tau-squared = 0.10

Test of SMD = 0: z = 3.32 *P* = 0.001

- - 1. Result of planned meta-analysis using fixed effects model

| Study | SMD | 95% Confident Interval | | % Weight |
| --- | --- | --- | --- | --- |
| Terzi R, OSA (2015) | 1.07 | 0.47 | 1.68 | 15.74 |
| Rizzi CF, OSA (2009) | 0.04 | -0.50 | 0.57 | 20.26 |
| Tseng PH, OSA (2017) | 0.84 | 0.44 | 1.23 | 37.09 |
| Kritikou I, OSA (2013) | 0.76 | 0.30 | 1.22 | 26.90 |
| Pooled SMD | 0.69 | 0.45 | 0.93 | 100.0 |

Heterogeneity chi-squared = 7.94 (d.f. = 3) *P* = 0.047

I2 (variation in SMD attributable to heterogeneity) = 62.2%

Test of SMD = 0 : z = 5.64 P = 0.00

- - 1. Result of Egger’s test (publication bias)

| Std_Eff | Coefficient | Std. err. | t | *P* > |t| | [95% conf. interval] | |
| --- | --- | --- | --- | --- | --- | --- |
| slope | 1.06 | 1.51 | 0.70 | 0.557 | -5.46 | 7.57 |
| bias | -1.52 | 6.18 | -0.25 | 0.829 | -28.11 | 25.07 |

Test of H0: no small-study effects *P* = 0.829

- - 1. Result of influence analysis

| Study omitted | Estimate | 95% Confident Interval | |
| --- | --- | --- | --- |
| Terzi R, OSA (2015) | 0.62 | 0.36 | 0.88 |
| Rizzi CF, OSA (2009) | 0.86 | 0.59 | 1.13 |
| Tseng PH, OSA (2017) | 0.60 | 0.30 | 0.91 |
| Kritikou I, OSA (2013) | 0.67 | 0.38 | 0.95 |
| Combined | 0.69 | 0.45 | 0.93 |

- 1. Neck circumference

NOTE: Only OSA was included in the sleep disorder type, therefore network meta-analysis is not applicable.

- - 1. Result of planned meta-analysis using random effects model

| Study | SMD | 95% Confident Interval | | % Weight |
| --- | --- | --- | --- | --- |
| Terzi R, OSA (2015) | 0.15 | -0.42 | 0.72 | 29.86 |
| Rizzi CF, OSA (2009) | 0.14 | -0.39 | 0.67 | 31.11 |
| Cintra F, OSA (2010) | 0.84 | 0.51 | 1.18 | 39.03 |
| Pooled SMD | 0.42 | 0.28 | 0.93 | 100.0 |

Heterogeneity chi-squared = 7.14 (d.f. = 2) *P* = 0.028

I2 (variation in SMD attributable to heterogeneity) = 72.0%

Estimate of between-study variance Tau-squared = 0.15

Test of SMD = 0: z = 1.59 *P* = 0.113

- - 1. Result of planned meta-analysis using fixed effects model

| Study | SMD | 95% Confident Interval | | % Weight |
| --- | --- | --- | --- | --- |
| Terzi R, OSA (2015) | 0.15 | -0.42 | 0.72 | 29.86 |
| Rizzi CF, OSA (2009) | 0.14 | -0.39 | 0.67 | 31.11 |
| Cintra F, OSA (2010) | 0.84 | 0.51 | 1.18 | 39.03 |
| Pooled SMD | 0.42 | 0.28 | 0.93 | 100.0 |

Heterogeneity chi-squared = 7.14 (d.f. = 2) *P* = 0.028

I2 (variation in SMD attributable to heterogeneity) = 72.0%

Test of SMD = 0: z = 4.23 *P* = 0.000

- - 1. Result of Egger’s test (publication bias)

| Std_Eff | Coefficient | Std. err. | t | *P* > |t| | [95% conf. interval] | |
| --- | --- | --- | --- | --- | --- | --- |
| slope | 1.91 | 0.15 | 12.46 | 0.051 | -0.04 | 3.86 |
| bias | -6.29 | 0.69 | -9.18 | 0.069 | -15.01 | 2.42 |

Test of H0: no small-study effects *P* = 0.069

- - 1. Result of influence analysis

| Study omitted | Estimate | 95% Confident Interval | |
| --- | --- | --- | --- |
| Terzi R, OSA (2015) | 0.65 | 0.36 | 0.93 |
| Rizzi CF, OSA (2009) | 0.66 | 0.38 | 0.95 |
| Cintra F, OSA (2010) | 0.14 | -0.24 | 0.53 |
| Combined | 0.55 | 0.29 | 0.80 |

- 1. Body fat

NOTE: Only sleep restriction was included in the sleep disorder type, therefore network meta-analysis is not applicable.

- - 1. Result of planned meta-analysis using random effects model

| Study | SMD | 95% Confident Interval | | % Weight |
| --- | --- | --- | --- | --- |
| Robertson MD, sleep restriction (2012) | 0.54 | -0.38 | 1.46 | 35.16 |
| Spaeth AM, sleep restriction (2015) | 0.19 | -0.49 | 0.86 | 64.84 |
| Pooled SMD | 0.31 | -0.24 | 0.85 | 100.0 |

Heterogeneity chi-squared = 0.36 (d.f. = 1) *P* = 0.548

I2 (variation in SMD attributable to heterogeneity) = 0.0%

Estimate of between-study variance Tau-squared = 0

Test of SMD = 0: z = 1.11 *P* = 0.265

- - 1. Result of planned meta-analysis using fixed effects model

| Study | SMD | 95% Confident Interval | | % Weight |
| --- | --- | --- | --- | --- |
| Robertson MD, sleep restriction (2012) | 0.54 | -0.38 | 1.46 | 35.16 |
| Spaeth AM, sleep restriction (2015) | 0.19 | -0.49 | 0.86 | 64.84 |
| Pooled SMD | 0.31 | -0.24 | 0.85 | 100.0 |

Heterogeneity chi-squared = 0.36 (d.f. = 1) *P* = 0.548

I2 (variation in SMD attributable to heterogeneity) = 0.0%

Test of SMD = 0: z = 1.11 *P* = 0.265

- - 1. Result of influence analysis

| Study omitted | Estimate | 95% Confident Interval | |
| --- | --- | --- | --- |
| Robertson MD, sleep restriction (2012) | 0.19 | -0.49 | 0.86 |
| Spaeth AM, sleep restriction (2015) | 0.54 | -0.38 | 0.45 |
| Combined | 0.31 | -0.24 | 0.85 |

- 1. Fasting glucose

A: Circadian shift; B: Control; C: Narcolepsy; D: OSA; E: Sleep extension; F: Sleep restriction.

- - 1. Multivariate meta-analysis results

|  | Coef. | Std. Err. | z | *P* > |z| | 95% CI | |
| --- | --- | --- | --- | --- | --- | --- |
| _y_B _cons | 0.17 | 0.09 | 1.83 | 0.07 | -0.01 | 0.34 |
| _y_C _cons | -0.05 | 0.36 | -0.14 | 0.89 | -0.75 | 0.65 |
| _y_D _cons | 0.57 | 0.12 | 4.85 | 0.00 | 0.34 | 0.80 |
| _y_E _cons | -0.97 | 0.36 | -2.68 | 0.01 | -1.67 | -0.26 |
| _y_F _cons | 0.34 | 0.47 | 0.73 | 0.46 | -0.58 | 1.26 |

- - 1. Estimated between-studies SDs and correlation matrix

|  | SD | _y_B | _y_C | _y_D | _y_E | _y_F |
| --- | --- | --- | --- | --- | --- | --- |
| _y_B | 1.859e-10 | 1 | . | . | . | . |
| _y_C | 1.859e-10 | 0.5 | 1 | . | . | . |
| _y_D | 1.859e-10 | 0.5 | 0.5 | 1 | . | . |
| _y_E | 1.859e-10 | 0.5 | 0.5 | 0.5 | 1 | . |
| _y_F | 1.859e-10 | 0.5 | 0.5 | 0.5 | 0.5 | 1 |

- - 1. Estimated probabilities (%) of each treatment having each rank

NOTE: (1) Assuming the maximum parameter is the best; (2) Using 10000 draws; (3) Allowing for parameter uncertainty.

| Rank | Circadian shift | Control | Narcolepsy | OSA | Sleep extension | Sleep restriction |
| --- | --- | --- | --- | --- | --- | --- |
| Best | 0.0 | 0.0 | 3.3 | 66.6 | 0.0 | 30.1 |
| 2nd | 1.0 | 25.6 | 12.0 | 32.0 | 0.0 | 29.4 |
| 3rd | 14.8 | 56.0 | 15.7 | 1.3 | 0.1 | 12.1 |
| 4th | 49.5 | 17.9 | 20.0 | 0.0 | 0.3 | 12.3 |
| 5th | 34.6 | 0.5 | 46.3 | 0.0 | 3.4 | 15.1 |
| Worst | 0.1 | 0.0 | 2.7 | 0.0 | 96.2 | 1.0 |

- - 1. Consistency evaluation by node splitting

* All the evidence about these contrasts comes from the trials which directly compare them.

|  | Direct | | Indirect | | Difference | | | |
| --- | --- | --- | --- | --- | --- | --- | --- | --- |
| Side | Coef. | Std. Err. | Coef. | Std. Err. | Coef. | Std. Err. | *P* > |z| | tau |
| A B * | 0.17 | 0.09 | -0.05 | 11.18 | 0.22 | 11.18 | 0.98 | 3.29e-10 |
| B C * | -0.22 | 0.34 | -0.33 | 63.22 | 0.12 | 63.23 | 1.00 | 9.22e-9 |
| B D * | 0.40 | 0.07 | -0.31 | 28.29 | 0.71 | 28.29 | 0.98 | 3.57e-9 |
| B E * | -1.13 | 0.35 | -0.42 | 63.25 | -0.71 | 63.25 | 0.99 | 4.94e-8 |
| B F * | 0.18 | 0.46 | -0.34 | 63.26 | 0.52 | 63.26 | 0.99 | 3.62e-9 |

- - 1. Result of planned meta-analysis using random effects model

| Study | SMD | 95% Confident Interval | | % Weight |
| --- | --- | --- | --- | --- |
| Robertson MD, sleep deprivation (2012) | 0.19 | -0.72 | 1.09 | 6.85 |
| Vgontzas AN, OSA (2000) | 1.40 | 0.54 | 2.27 | 7.17 |
| Rizzi CF, OSA (2009) | 0.58 | 0.03 | 1.12 | 10.77 |
| Abelleira R, OSA (2023) | 0.34 | 0.15 | 0.54 | 15.12 |
| Bermingham KM, circadian shift (2023) | -0.17 | -0.34 | 0.01 | 15.25 |
| Beitinger PA, narcolepsy (2012) | -0.22 | -0.90 | 0.45 | 9.17 |
| Al Khatib HK, sleep extension (2018) | -1.16 | -1.84 | -0.48 | 9.08 |
| Cintra F, OSA (2010) | 0.28 | -0.04 | 0.61 | 13.71 |
| Tseng PH, OSA (2017) | 0.54 | 0.16 | 0.93 | 12.89 |
| Pooled SMD | 0.19 | -0.13 | 0.50 | 100.0 |

Heterogeneity chi-squared = 46.15 (d.f. = 8) *P* = 0.000

I2 (variation in SMD attributable to heterogeneity) = 82.7%

Estimate of between-study variance Tau-squared = 0.16

Test of SMD = 0: z = 1.17 *P* = 0.244

- - 1. Result of planned meta-analysis using fixed effects model

| Study | SMD | 95% Confident Interval | | % Weight |
| --- | --- | --- | --- | --- |
| Robertson MD, sleep deprivation (2012) | 0.19 | -0.72 | 1.09 | 1.44 |
| Vgontzas AN, OSA (2000) | 1.40 | 0.54 | 2.27 | 1.57 |
| Rizzi CF, OSA (2009) | 0.58 | 0.03 | 1.12 | 3.96 |
| Abelleira R, OSA (2023) | 0.34 | 0.15 | 0.54 | 31.40 |
| Bermingham KM, circadian shift (2023) | -0.17 | -0.34 | 0.01 | 37.24 |
| Beitinger PA, narcolepsy (2012) | -0.22 | -0.90 | 0.45 | 2.59 |
| Al Khatib HK, sleep extension (2018) | -1.16 | -1.85 | -0.48 | 2.53 |
| Cintra F, OSA (2010) | 0.28 | -0.04 | 0.61 | 11.37 |
| Tseng PH, OSA (2017) | 0.54 | 0.16 | 0.93 | 7.91 |
| Pooled SMD | 0.13 | 0.03 | 0.24 | 100.0 |

Heterogeneity chi-squared = 46.15 (d.f. = 8) *P* = 0.000

I2 (variation in SMD attributable to heterogeneity) = 82.7%

Test of SMD = 0: z = 2.41 *P* = 0.016

- - 1. Result of Egger’s test (publication bias)

| Std_Eff | Coefficient | Std. err. | t | *P* > |t| | [95% conf. interval] | |
| --- | --- | --- | --- | --- | --- | --- |
| slope | 0.04 | 0.27 | 0.14 | 0.889 | -0.59 | 0.67 |
| bias | 0.67 | 1.61 | 0.42 | 0.690 | -3.14 | 4.48 |

Test of H0: no small-study effects *P* = 0.690

- - 1. Result of influence analysis

| Study omitted | Estimate | 95% Confident Interval | |
| --- | --- | --- | --- |
| Robertson MD, sleep deprivation (2012) | 0.13 | 0.23 | 0.24 |
| Vgontzas AN, OSA (2000) | 0.11 | 0.00 | 0.22 |
| Rizzi CF, OSA (2009) | 0.11 | 0.00 | 0.23 |
| Abelleira R, OSA (2023) | 0.04 | -0.09 | 0.17 |
| Bermingham KM, circadian shift (2023) | 0.31 | 0.17 | 0.45 |
| Beitinger PA, narcolepsy (2012) | 0.14 | 0.03 | 0.25 |
| Al Khatib HK, sleep extension (2018) | 0.17 | 0.06 | 0.28 |
| Cintra F, OSA (2010) | 0.11 | -0.00 | 0.23 |
| Tseng PH, OSA (2017) | 0.10 | -0.01 | 0.21 |
| Combined | 0.13 | 0.02 | 0.24 |

- 1. Fasting insulin

A: Circadian shift; B: Control; C: OSA.

NOTE: Only one study of OSA and one study of circadian shift was included in the sleep disorder type, therefore there is no source of heterogeneity for network meta-analysis.

- - 1. Result of planned meta-analysis using random effects model

| Study | SMD | 95% Confident Interval | | % Weight |
| --- | --- | --- | --- | --- |
| Vgontzas AN, OSA (2000) | 0.87 | 0.07 | 1.68 | 35.42 |
| Bermingham KM, circadian shift (2023) | 0.13 | -0.05 | 0.31 | 64.58 |
| Pooled SMD | 0.39 | -0.31 | 1.09 | 100.0 |

Heterogeneity chi-squared = 3.12 (d.f. = 1) *P* = 0.078

I2 (variation in SMD attributable to heterogeneity) = 67.9%

Estimate of between-study variance Tau-squared = 0.19

Test of SMD = 0: z = 1.10 *P* = 0.272

- - 1. Result of planned meta-analysis using fixed effects model

| Study | SMD | 95% Confident Interval | | % Weight |
| --- | --- | --- | --- | --- |
| Vgontzas AN, OSA (2000) | 0.87 | 0.07 | 1.68 | 4.57 |
| Bermingham KM, circadian shift (2023) | 0.13 | -0.05 | 0.31 | 95.43 |
| Pooled SMD | 0.16 | -0.01 | 0.34 | 100.0 |

Heterogeneity chi-squared = 3.12 (d.f. = 1) *P* = 0.078

I2 (variation in SMD attributable to heterogeneity) = 67.9%

Test of SMD = 0: z = 1.83 *P* = 0.067

- - 1. Result of influence analysis

| Study omitted | Estimate | 95% Confident Interval | |
| --- | --- | --- | --- |
| Vgontzas AN, OSA (2000) | 0.13 | -0.05 | 0.30 |
| Bermingham KM, circadian shift (2023) | 0.87 | 0.06 | 1.68 |
| Combined | 0.16 | -0.01 | 0.34 |

- 1. HbA1c

A: Circadian shift; B: Control; C: Narcolepsy; D: OSA.

- - 1. Multivariate meta-analysis results

|  | Coef. | Std. Err. | z | *P* > |z| | 95% CI | |
| --- | --- | --- | --- | --- | --- | --- |
| _y_B _cons | 0.25 | 0.09 | 2.76 | 0.01 | 0.72 | 0.43 |
| _y_C _cons | 1.35 | 0.38 | 3.53 | 0.00 | 0.60 | 2.10 |
| _y_D _cons | 0.51 | 0.17 | 3.06 | 0.00 | 0.18 | 0.84 |

- - 1. Estimated between-studies SDs and correlation matrix

|  | SD | _y_B | _y_C | _y_D |
| --- | --- | --- | --- | --- |
| _y_B | 4.577e-10 | 1 | . | . |
| _y_C | 4.577e-10 | 0.5 | 1 | . |
| _y_D | 4.577e-10 | 0.5 | 0.5 | 1 |

- - 1. Estimated probabilities (%) of each treatment having each rank

NOTE: (1) Assuming the maximum parameter is the best; (2) Using 10000 draws; (3) Allowing for parameter uncertainty.

| Rank | Circadian shift | Control | Narcolepsy | OSA |
| --- | --- | --- | --- | --- |
| Best | 0.0 | 0.0 | 98.3 | 1.7 |
| 2nd | 0.0 | 3.3 | 1.6 | 95.1 |
| 3rd | 0.3 | 96.5 | 0.1 | 3.1 |
| Worst | 99.7 | 0.2 | 0.0 | 0.1 |

- - 1. Consistency evaluation by node splitting

* All the evidence about these contrasts comes from the trials which directly compare them.

|  | Direct | | Indirect | | Difference | | | |
| --- | --- | --- | --- | --- | --- | --- | --- | --- |
| Side | Coef. | Std. Err. | Coef. | Std. Err. | Coef. | Std. Err. | *P* > |z| | tau |
| A B * | 0.25 | 0.09 | -0.25 | 18.23 | 0.50 | 18.23 | 0.98 | 1.78e-9 |
| B C * | 1.10 | 0.37 | -0.50 | 63.30 | 1.60 | 63.30 | 0.98 | 3.10e-10 |
| B D * | 0.26 | 0.14 | -0.44 | 44.78 | 0.70 | 44.78 | 0.99 | 4.06e-9 |

- - 1. Result of planned meta-analysis using random effects model

| Study | SMD | 95% Confident Interval | | % Weight |
| --- | --- | --- | --- | --- |
| Abelleira R, OSA (2023) | 0.19 | -0.21 | 0.58 | 25.71 |
| Bermingham KM, circadian shift (2023) | -0.25 | -0.43 | -0.07 | 29.96 |
| Beitinger PA, narcolepsy (2012) | 1.13 | 0.40 | 1.86 | 18.23 |
| Tseng PH, OSA (2017) | 0.33 | -0.05 | 0.72 | 26.10 |
| Pooled SMD | 0.27 | -0.21 | 0.75 | 100.0 |

Heterogeneity chi-squared = 20.26 (d.f. = 3) *P* = 0.000

I2 (variation in SMD attributable to heterogeneity) = 85.2%

Estimate of between-study variance Tau-squared = 0.1928

Test of SMD = 0: z = 1.09 *P* = 0.277

- - 1. Result of planned meta-analysis using fixed effects model

| Study | SMD | 95% Confident Interval | | % Weight |
| --- | --- | --- | --- | --- |
| Abelleira R, OSA (2023) | 0.19 | -0.21 | 0.59 | 13.43 |
| Bermingham KM, circadian shift (2023) | -0.25 | -0.43 | -0.07 | 67.87 |
| Beitinger PA, narcolepsy (2012) | 1.13 | 0.40 | 1.86 | 4.04 |
| Tseng PH, OSA (2017) | 0.33 | -0.05 | 0.72 | 14.65 |
| Pooled SMD | -0.05 | -0.20 | 0.10 | 100.0 |

Heterogeneity chi-squared = 20.26 (d.f. = 3) *P* = 0.000

I2 (variation in SMD attributable to heterogeneity) = 85.2%

Test of SMD = 0: z = 0.67 *P* = 0.504

- - 1. Result of Egger’s test (publication bias)

| Std_Eff | Coefficient | Std. err. | t | *P* > |t| | [95% conf. interval] | |
| --- | --- | --- | --- | --- | --- | --- |
| slope | -0.69 | 0.08 | -8.99 | 0.012 | -1.02 | -0.36 |
| bias | 4.82 | 0.51 | 9.40 | 0.011 | 2.61 | 7.03 |

Test of H0: no small-study effects *P* = 0.011

- - 1. Result of trim-and-fill method (publication bias)

| Studies | Effect size | [95% conf. interval] | |
| --- | --- | --- | --- |
| Observed | 0.275 | -0.236 | 0.786 |
| Observed + Imputed | 0.275 | -0.236 | 0.786 |

Model: Random-effects

Number of studies: 4

Observed: 4

Imputed: 0

- - 1. Result of influence analysis

| Study omitted | Estimate | 95% Confident Interval | |
| --- | --- | --- | --- |
| Abelleira R, OSA (2023) | -0.09 | -0.24 | 0.07 |
| Bermingham KM, circadian shift (2023) | 0.37 | 0.11 | 0.63 |
| Beitinger PA, narcolepsy (2012) | -0.10 | -0.25 | 0.05 |
| Tseng PH, OSA (2017) | -0.12 | -0.27 | 0.04 |
| Combined | -0.05 | -0.20 | 0.10 |

- 1. LDL

A: Circadian shift; B: Control; C: OSA; D: Sleep extension.

- - 1. Multivariate meta-analysis results

|  | Coef. | Std. Err. | z | *P* > |z| | 95% CI | |
| --- | --- | --- | --- | --- | --- | --- |
| _y_B _cons | 0.14 | 0.09 | 1.53 | 0.13 | -0.04 | 0.32 |
| _y_C _cons | 0.38 | 0.12 | 3.09 | 0.00 | 0.14 | 0.63 |
| _y_D _cons | 0.14 | 0.33 | 0.42 | 0.68 | -0.52 | 0.79 |

- - 1. Estimated between-studies SDs and correlation matrix

|  | SD | _y_B | _y_C | _y_D |
| --- | --- | --- | --- | --- |
| _y_B | 3.019e-9 | 1 | . | . |
| _y_C | 3.019e-9 | 0.5 | 1 | . |
| _y_D | 3.019e-9 | 0.5 | 0.5 | 1 |

- - 1. Estimated probabilities (%) of each treatment having each rank

NOTE: (1) Assuming the maximum parameter is the best; (2) Using 10000 draws; (3) Allowing for parameter uncertainty.

| Rank | Circadian shift | Control | OSA | Sleep extension |
| --- | --- | --- | --- | --- |
| Best | 0.0 | 0.1 | 76.8 | 23.0 |
| 2nd | 3.1 | 47.3 | 23.0 | 26.6 |
| 3rd | 33.2 | 49.7 | 0.2 | 16.9 |
| Worst | 63.6 | 2.9 | 0.0 | 33.5 |

- - 1. Consistency evaluation by node splitting

* All the evidence about these contrasts comes from the trials which directly compare them.

|  | Direct | | Indirect | | Difference | | | |
| --- | --- | --- | --- | --- | --- | --- | --- | --- |
| Side | Coef. | Std. Err. | Coef. | Std. Err. | Coef. | Std. Err. | *P* > |z| | tau |
| A B * | 0.14 | 0.09 | -0.08 | 15.82 | 0.22 | 15.82 | 0.99 | 8.06e-10 |
| B C * | 0.25 | 0.08 | -0.25 | 36.53 | 0.50 | 36.53 | 0.99 | 1.40e-8 |
| B D * | 1.11e-12 | 0.32 | -0.28 | 63.24 | 0.28 | 63.24 | 1.00 | 1.16e-9 |

- - 1. Result of planned meta-analysis using random effects model

| Study | SMD | 95% Confident Interval | | % Weight |
| --- | --- | --- | --- | --- |
| Abelleira R, OSA (2023) | 0.21 | -0.02 | 0.44 | 25.77 |
| Bermingham KM, circadian shift (2023) | -0.14 | -0.32 | 0.04 | 29.04 |
| Al Khatib HK, sleep extension (2018) | 0.00 | -0.63 | 0.63 | 8.65 |
| Cintra F, OSA (2010) | 0.32 | -0.00 | 0.64 | 19.80 |
| Tseng PH, OSA (2017) | 0.25 | -0.13 | 0.63 | 16.75 |
| Pooled SMD | 0.12 | -0.09 | 0.33 | 100.0 |

Heterogeneity chi-squared = 9.97 (d.f. = 4) *P* = 0.041

I2 (variation in SMD attributable to heterogeneity) = 59.9%

Estimate of between-study variance Tau-squared = 0.03

Test of SMD = 0: z = 1.10 *P* = 0.272

- - 1. Result of planned meta-analysis using fixed effects model

| Study | SMD | 95% Confident Interval | | % Weight |
| --- | --- | --- | --- | --- |
| Abelleira R, OSA (2023) | 0.21 | -0.02 | 0.44 | 27.81 |
| Bermingham KM, circadian shift (2023) | -0.14 | -0.32 | 0.04 | 45.07 |
| Al Khatib HK, sleep extension (2018) | 0.00 | -0.63 | 0.63 | 3.59 |
| Cintra F, OSA (2010) | 0.32 | -0.00 | 0.64 | 13.72 |
| Tseng PH, OSA (2017) | 0.25 | -0.13 | 0.63 | 9.81 |
| Pooled SMD | 0.06 | -0.06 | 0.18 | 100.0 |

Heterogeneity chi-squared = 9.97 (d.f. = 4) *P* = 0.041

I2 (variation in SMD attributable to heterogeneity) = 59.9%

Test of SMD = 0: z = 1.05 *P* = 0.292

- - 1. Result of Egger’s test (publication bias)

| Std_Eff | Coefficient | Std. err. | t | *P* > |t| | [95% conf. interval] | |
| --- | --- | --- | --- | --- | --- | --- |
| slope | -0.17 | 0.26 | -0.68 | 0.547 | -0.99 | 0.64 |
| bias | 1.88 | 1.88 | 1.00 | 0.390 | -4.09 | 7.85 |

Test of H0: no small-study effects *P* = 0.390

- - 1. Result of influence analysis

| Study omitted | Estimate | 95% Confident Interval | |
| --- | --- | --- | --- |
| Abelleira R, OSA (2023) | 0.01 | -0.13 | 0.15 |
| Bermingham KM, circadian shift (2023) | 0.23 | 0.07 | 0.39 |
| Al Khatib HK, sleep extension (2018) | 0.07 | -0.05 | 0.19 |
| Cintra F, OSA (2010) | 0.02 | -0.11 | 0.15 |
| Tseng PH, OSA (2017) | 0.04 | -0.08 | 0.17 |
| Combined | 0.06 | -0.06 | 0.18 |

- 1. HDL

A: Control; B: OSA; C: Sleep extension.

- - 1. Multivariate meta-analysis results

|  | Coef. | Std. Err. | z | *P* > |z| | 95% CI | |
| --- | --- | --- | --- | --- | --- | --- |
| _y_B _cons | -0.04 | 0.08 | -0.45 | 0.65 | -0.20 | 0.13 |
| _y_C _cons | -0.39 | 0.32 | -1.20 | 0.23 | -1.03 | 0.25 |

- - 1. Estimated between-studies SDs and correlation matrix

|  | SD | _y_B | _y_C |
| --- | --- | --- | --- |
| _y_B | 4.200e-15 | 1 | . |
| _y_C | 4.200e-15 | 0.5 | 1 |

- - 1. Estimated probabilities (%) of each treatment having each rank

NOTE: (1) Assuming the maximum parameter is the best; (2) Using 10000 draws; (3) Allowing for parameter uncertainty.

| Rank | Control | OSA | Sleep extension |
| --- | --- | --- | --- |
| Best | 59.7 | 29.6 | 10.7 |
| 2nd | 36.7 | 58.6 | 4.8 |
| Worst | 3.6 | 11.8 | 84.5 |

- - 1. Consistency evaluation by node splitting

Node splitting not applicable for the limited number of eligible studies.

- - 1. Result of planned meta-analysis using random effects model

| Study | SMD | 95% Confident Interval | | % Weight |
| --- | --- | --- | --- | --- |
| Abelleira R, OSA (2023) | 0.02 | -0.20 | 0.25 | 50.64 |
| Al Khatib HK, sleep extension (2018) | -0.40 | -1.04 | 0.24 | 6.37 |
| Cintra F, OSA (2010) | -0.06 | -0.38 | 0.26 | 25.15 |
| Tseng PH, OSA (2017) | -0.18 | -0.56 | 0.20 | 17.83 |
| Pooled SMD | -0.06 | -0.22 | 0.10 | 100.0 |

Heterogeneity chi-squared = 1.97 (d.f. = 3) *P* = 0.580

I2 (variation in SMD attributable to heterogeneity) = 0.0%

Estimate of between-study variance Tau-squared = 0.00

Test of SMD = 0: z = 0.75 *P* = 0.454

- - 1. Result of planned meta-analysis using fixed effects model

| Study | SMD | 95% Confident Interval | | % Weight |
| --- | --- | --- | --- | --- |
| Abelleira R, OSA (2023) | 0.02 | -0.20 | 0.25 | 50.64 |
| Al Khatib HK, sleep extension (2018) | -0.30 | -1.04 | 0.24 | 6.37 |
| Cintra F, OSA (2010) | -0.06 | -0.38 | 0.26 | 25.15 |
| Tseng PH, OSA (2017) | -0.18 | -0.56 | 0.20 | 17.83 |
| Pooled SMD | -0.06 | -0.22 | 0.10 | 100.0 |

Heterogeneity chi-squared = 1.97 (d.f. = 3) *P* = 0.580

I2 (variation in SMD attributable to heterogeneity) = 0.0%

Test of SMD = 0: z = 0.75 *P* = 0.454

- - 1. Result of Egger’s test (publication bias)

| Std_Eff | Coefficient | Std. err. | t | *P* > |t| | [95% conf. interval] | |
| --- | --- | --- | --- | --- | --- | --- |
| slope | 0.26 | 0.04 | 7.32 | 0.018 | 0.11 | 0.42 |
| bias | -2.10 | 0.22 | -9.57 | 0.011 | -3.05 | -1.16 |

Test of H0: no small-study effects *P* = 0.011

- - 1. Result of Egger’s test (publication bias)

| Studies | Effect size | [95% conf. interval] | |
| --- | --- | --- | --- |
| Observed | -0.061 | -0.222 | 0.099 |
| Observed + Imputed | -0.006 | -0.150 | 0.138 |

Model: Random-effects

Number of studies: 6

Observed: 4

Imputed: 2

- - 1. Result of influence analysis

| Study omitted | Estimate | 95% Confident Interval | |
| --- | --- | --- | --- |
| Abelleira R, OSA (2023) | -0.15 | -0.38 | 0.08 |
| Al Khatib HK, sleep extension (2018) | -0.04 | -0.20 | 0.13 |
| Cintra F, OSA (2010) | -0.06 | -0.25 | 0.12 |
| Tseng PH, OSA (2017) | -0.04 | -0.21 | 0.14 |
| Combined | -0.06 | -0.22 | 0.10 |

- 1. Total cholesterol

A: Circadian shift; B: Control; C: Narcolepsy; D: OSA; E: Sleep extension.

- - 1. Multivariate meta-analysis results

|  | Coef. | Std. Err. | z | *P* > |z| | 95% CI | |
| --- | --- | --- | --- | --- | --- | --- |
| _y_B _cons | 0.19 | 0.09 | 2.05 | 0.04 | 0.01 | 0.36 |
| _y_C _cons | 0.93 | 0.37 | 2.52 | 0.01 | 0.21 | 1.65 |
| _y_D _cons | 0.37 | 0.12 | 2.99 | 0.00 | 0.13 | 0.61 |
| _y_E _cons | -0.11 | 0.34 | -0.34 | 0.74 | -0.77 | 0.54 |

- - 1. Estimated between-studies SDs and correlation matrix

|  | SD | _y_B | _y_C | _y_D | _y_E |
| --- | --- | --- | --- | --- | --- |
| _y_B | 1.676e-10 | 1 | . | . | . |
| _y_C | 1.676e-10 | 0.5 | 1 | . | . |
| _y_D | 1.676e-10 | 0.5 | 0.5 | 1 | . |
| _y_E | 1.676e-10 | 0.5 | 0.5 | 0.5 | 1 |

- - 1. Estimated probabilities (%) of each treatment having each rank

NOTE: (1) Assuming the maximum parameter is the best; (2) Using 10000 draws; (3) Allowing for parameter uncertainty.

| Rank | Circadian shift | Control | Narcolepsy | OSA | Sleep extension |
| --- | --- | --- | --- | --- | --- |
| Best | 0.0 | 0.0 | 93.2 | 5.9 | 0.8 |
| 2nd | 0.1 | 2.5 | 4.6 | 86.1 | 6.7 |
| 3rd | 2.2 | 78.5 | 1.2 | 7.7 | 10.4 |
| 4th | 61.2 | 18.5 | 0.8 | 0.2 | 19.4 |
| Worst | 36.6 | 0.4 | 0.2 | 0.0 | 62.7 |

- - 1. Consistency evaluation by node splitting

* All the evidence about these contrasts comes from the trials which directly compare them.

|  | Direct | | Indirect | | Difference | | | |
| --- | --- | --- | --- | --- | --- | --- | --- | --- |
| Side | Coef. | Std. Err. | Coef. | Std. Err. | Coef. | Std. Err. | *P* > |z| | tau |
| A B * | 0.19 | 0.09 | -0.10 | 14.13 | 0.28 | 14.13 | 0.98 | 3.66e-9 |
| B C * | 0.74 | 0.36 | -0.37 | 63.24 | 1.11 | 63.23 | 0.99 | 1.53e-10 |
| B D * | 0.18 | 0.08 | -0.35 | 36.51 | 0.54 | 36.51 | 0.99 | 4.38e-9 |
| B E * | -0.30 | 0.32 | -0.39 | 63.23 | 0.10 | 63.23 | 1.00 | 2.79e-10 |

- - 1. Result of planned meta-analysis using random effects model

| Study | SMD | 95% Confident Interval | | % Weight |
| --- | --- | --- | --- | --- |
| Abelleira R, OSA (2023) | 0.16 | -0.07 | 0.39 | 22.81 |
| Bermingham KM, circadian shift (2023) | -0.19 | -0.36 | -0.01 | 24.86 |
| Al Khatib HK, sleep extension (2018) | -0.31 | -0.94 | 0.33 | 9.22 |
| Cintra F, OSA (2010) | 0.25 | -0.07 | 0.57 | 18.70 |
| Tseng PH, OSA (2017) | 0.17 | -0.21 | 0.55 | 16.37 |
| Beitinger PA, narcolepsy (2012) | 0.76 | 0.07 | 1.46 | 8.05 |
| Pooled SMD | 0.10 | -0.14 | 0.33 | 100.0 |

Heterogeneity chi-squared = 14.55 (d.f. = 5) *P* = 0.012

I2 (variation in SMD attributable to heterogeneity) = 65.6%

Estimate of between-study variance Tau-squared = 0.05

Test of SMD = 0: z = 0.82 *P* = 0.410

- - 1. Result of planned meta-analysis using fixed effects model

| Study | SMD | 95% Confident Interval | | % Weight |
| --- | --- | --- | --- | --- |
| Abelleira R, OSA (2023) | 0.16 | -0.07 | 0.39 | 26.99 |
| Bermingham KM, circadian shift (2023) | -0.19 | -0.36 | -0.01 | 43.85 |
| Al Khatib HK, sleep extension (2018) | -0.31 | -0.94 | 0.33 | 3.44 |
| Cintra F, OSA (2010) | 0.25 | -0.07 | 0.57 | 13.35 |
| Tseng PH, OSA (2017) | 0.17 | -0.21 | 0.55 | 9.54 |
| Beitinger PA, narcolepsy (2012) | 0.76 | 0.07 | 1.46 | 2.83 |
| Pooled SMD | 0.02 | -0.10 | 0.14 | 100.0 |

Heterogeneity chi-squared = 14.55 (d.f. = 5) *P* = 0.012

I2 (variation in SMD attributable to heterogeneity) = 65.6%

Test of SMD = 0: z = 0.37 *P* = 0.712

- - 1. Result of Egger’s test (publication bias)

| Std_Eff | Coefficient | Std. err. | t | *P* > |t| | [95% conf. interval] | |
| --- | --- | --- | --- | --- | --- | --- |
| slope | -0.23 | 0.23 | -1.01 | 0.370 | -0.85 | 0.40 |
| bias | 1.89 | 1.54 | 1.23 | 0.287 | -2.38 | 6.16 |

Test of H0: no small-study effects *P* = 0.287

- - 1. Result of influence analysis

| Study omitted | Estimate | 95% Confident Interval | |
| --- | --- | --- | --- |
| Abelleira R, OSA (2023) | -0.03 | -0.17 | 0.11 |
| Bermingham KM, circadian shift (2023) | 0.18 | 0.03 | 0.34 |
| Al Khatib HK, sleep extension (2018) | 0.03 | -0.09 | 0.15 |
| Cintra F, OSA (2010) | -0.01 | -0.14 | 0.11 |
| Tseng PH, OSA (2017) | 0.01 | -0.12 | 0.13 |
| Beitinger PA, narcolepsy (2012) | 0.00 | -0.12 | 0.12 |
| Combined | 0.02 | -0.10 | 0.14 |

- 1. Total triglycerides

A: Circadian shift; B: Control; C: OSA; D: Sleep extension.

- - 1. Multivariate meta-analysis results

|  | Coef. | Std. Err. | z | *P* > |z| | 95% CI | |
| --- | --- | --- | --- | --- | --- | --- |
| _y_B _cons | -0.09 | 0.09 | -1.03 | 0.30 | -0.27 | 0.08 |
| _y_C _cons | -0.03 | 0.12 | -0.26 | 0.80 | -0.75 | 0.56 |
| _y_D _cons | -0.09 | 0.33 | -0.28 | 0.78 | -0.75 | 0.56 |

- - 1. Estimated between-studies SDs and correlation matrix

|  | SD | _y_B | _y_C | _y_D |
| --- | --- | --- | --- | --- |
| _y_B | 8.489e-10 | 1 | . | . |
| _y_C | 8.489e-10 | 0.5 | 1 | . |
| _y_D | 8.489e-10 | 0.5 | 0.5 | 1 |

- - 1. Estimated probabilities (%) of each treatment having each rank

NOTE: (1) Assuming the maximum parameter is the best; (2) Using 10000 draws; (3) Allowing for parameter uncertainty.

| Rank | Circadian shift | Control | OSA | Sleep extension |
| --- | --- | --- | --- | --- |
| Best | 40.0 | 1.8 | 24.1 | 34.1 |
| 2nd | 34.8 | 17.5 | 37.2 | 10.4 |
| 3rd | 17.8 | 48.4 | 26.3 | 7.4 |
| Worst | 7.4 | 32.2 | 12.4 | 48.0 |

- - 1. Consistency evaluation by node splitting

* All the evidence about these contrasts comes from the trials which directly compare them.

|  | Direct | | Indirect | | Difference | | | |
| --- | --- | --- | --- | --- | --- | --- | --- | --- |
| Side | Coef. | Std. Err. | Coef. | Std. Err. | Coef. | Std. Err. | *P* > |z| | tau |
| A B * | -0.09 | 0.09 | -0.02 | 15.80 | -0.07 | 15.81 | 1.00 | 1.12e-9 |
| B C * | 0.06 | 0.08 | 0.19 | 36.50 | -0.13 | 36.50 | 1.00 | 1.43e-10 |
| B D * | 5.83e-12 | 0.32 | 0.19 | 63.26 | -0.19 | 63.26 | 1.00 | 5.23e-9 |

- - 1. Result of planned meta-analysis using random effects model

| Study | SMD | 95% Confident Interval | | % Weight |
| --- | --- | --- | --- | --- |
| Abelleira R, OSA (2023) | 0.02 | -0.20 | 0.24 | 28.69 |
| Bermingham KM, circadian shift (2023) | 0.09 | -0.08 | 0.27 | 44.50 |
| Al Khatib HK, sleep extension (2018) | 0.00 | -0.63 | 0.63 | 3.52 |
| Cintra F, OSA (2010) | 0.16 | -0.17 | 0.48 | 13.59 |
| Tseng PH, OSA (2017) | 0.05 | -0.33 | 0.43 | 9.69 |
| Pooled SMD | 0.07 | -0.05 | 0.19 | 100.0 |

Heterogeneity chi-squared = 0.57 (d.f. = 4) *P* = 0.966

I2 (variation in SMD attributable to heterogeneity) = 0.0%

Estimate of between-study variance Tau-squared = 0.00

Test of SMD = 0: z = 1.22 *P* = 0.222

- - 1. Result of planned meta-analysis using fixed effects model

| Study | SMD | 95% Confident Interval | | % Weight |
| --- | --- | --- | --- | --- |
| Abelleira R, OSA (2023) | 0.02 | -0.20 | 0.24 | 28.69 |
| Bermingham KM, circadian shift (2023) | 0.09 | -0.08 | 0.27 | 44.50 |
| Al Khatib HK, sleep extension (2018) | 0.00 | -0.63 | 0.63 | 3.52 |
| Cintra F, OSA (2010) | 0.16 | -0.17 | 0.48 | 13.59 |
| Tseng PH, OSA (2017) | 0.05 | -0.33 | 0.43 | 9.69 |
| Pooled SMD | 0.07 | -0.05 | 0.19 | 100.0 |

Heterogeneity chi-squared = 0.57 (d.f. = 4) *P* = 0.966

I2 (variation in SMD attributable to heterogeneity) = 0.0%

Test of SMD = 0: z = 1.22 *P* = 0.222

- - 1. Result of Egger’s test (publication bias)

| Std_Eff | Coefficient | Std. err. | t | *P* > |t| | [95% conf. interval] | |
| --- | --- | --- | --- | --- | --- | --- |
| slope | 0.09 | 0.07 | 1.35 | 0.270 | -0.13 | 0.31 |
| bias | -0.15 | 0.51 | -0.30 | 0.785 | -1.77 | 1.47 |

Test of H0: no small-study effects *P* = 0.785

- - 1. Result of influence analysis

| Study omitted | Estimate | 95% Confident Interval | |
| --- | --- | --- | --- |
| Abelleira R, OSA (2023) | 0.09 | -0.05 | 0.23 |
| Bermingham KM, circadian shift (2023) | 0.06 | -0.10 | 0.22 |
| Al Khatib HK, sleep extension (2018) | 0.08 | -0.04 | 0.20 |
| Cintra F, OSA (2010) | 0.06 | -0.07 | 0.19 |
| Tseng PH, OSA (2017) | 0.08 | -0.05 | 0.20 |
| Combined | 0.07 | -0.04 | 0.19 |

- 1. Leptin

A: Control; B: OSA; C: Sleep restriction.

- - 1. Multivariate meta-analysis results

|  | Coef. | Std. Err. | z | *P* > |z| | 95% CI | |
| --- | --- | --- | --- | --- | --- | --- |
| _y_B _cons | 0.82 | 0.49 | 1.65 | 0.10 | -0.15 | 1.79 |
| _y_C _cons | 0.29 | 0.41 | 0.72 | 0.47 | -0.50 | 1.09 |

- - 1. Estimated between-studies SDs and correlation matrix

|  | SD | _y_B | _y_C |
| --- | --- | --- | --- |
| _y_B | 0.59 | 1 | . |
| _y_C | 0.59 | 0.5 | 1 |

- - 1. Estimated probabilities (%) of each treatment having each rank

NOTE: (1) Assuming the maximum parameter is the best; (2) Using 10000 draws; (3) Allowing for parameter uncertainty.

| Rank | Control | OSA | Sleep restriction |
| --- | --- | --- | --- |
| Best | 1.3 | 79.0 | 10.7 |
| 2nd | 27.0 | 16.8 | 56.2 |
| Worst | 71.7 | 4.3 | 24.0 |

- - 1. Consistency evaluation by node splitting

Node splitting not applicable for the limited number of eligible studies.

- - 1. Result of planned meta-analysis using random effects model

| Study | SMD | 95% Confident Interval | | % Weight |
| --- | --- | --- | --- | --- |
| Robertson MD, sleep restriction (2012) | 0.75 | -0.19 | 1.68 | 16.97 |
| Simpson NS, sleep restriction (2010) | -0.06 | -0.73 | 0.62 | 21.81 |
| Vgontzas AN, OSA (2000) | 1.76 | 0.85 | 2.68 | 17.25 |
| Calvin AD, sleep restriction (2013) | 0.32 | -0.36 | 0.99 | 21.77 |
| Kritikou I, OSA (2013) | 0.20 | -0.46 | 0.85 | 22.21 |
| Pooled SMD | 0.53 | -0.04 | 1.10 | 100.0 |

Heterogeneity chi-squared = 11.18 (d.f. = 4) *P* = 0.025

I2 (variation in SMD attributable to heterogeneity) = 64.2%

Estimate of between-study variance Tau-squared = 0.26

Test of SMD = 0: z = 1.84 *P* = 0.07

- - 1. Result of planned meta-analysis using fixed effects model

| Study | SMD | 95% Confident Interval | | % Weight |
| --- | --- | --- | --- | --- |
| Robertson MD, sleep restriction (2012) | 0.75 | -0.19 | 1.68 | 12.65 |
| Simpson NS, sleep restriction (2010) | -0.06 | -0.73 | 0.62 | 24.30 |
| Vgontzas AN, OSA (2000) | 1.76 | 0.85 | 2.68 | 13.11 |
| Calvin AD, sleep restriction (2013) | 0.32 | -0.36 | 0.99 | 24.15 |
| Kritikou I, OSA (2013) | 0.20 | -0.46 | 0.85 | 25.78 |
| Pooled SMD | 0.44 | 0.11 | 0.77 | 100.0 |

Heterogeneity chi-squared = 11.18 (d.f. = 4) *P* = 0.025

I2 (variation in SMD attributable to heterogeneity) = 64.2%

Test of SMD = 0: z = 2.58 *P* = 0.010

- - 1. Result of Egger’s test (publication bias)

| Std_Eff | Coefficient | Std. err. | t | *P* > |t| | [95% conf. interval] | |
| --- | --- | --- | --- | --- | --- | --- |
| slope | -2.64 | 1.18 | -2.25 | 0.110 | -6.39 | 1.10 |
| bias | 8.22 | 3.10 | 2.65 | 0.077 | -1.65 | 18.08 |

Test of H0: no small-study effects *P* = 0.077

- - 1. Result of influence analysis

| Study omitted | Estimate | 95% Confident Interval | |
| --- | --- | --- | --- |
| Robertson MD, sleep restriction (2012) | 0.39 | 0.04 | 0.75 |
| Simpson NS, sleep restriction (2010) | 0.60 | 0.22 | 0.98 |
| Vgontzas AN, OSA (2000) | 0.24 | -0.12 | 0.59 |
| Calvin AD, sleep restriction (2013) | 0.48 | 0.10 | 0.86 |
| Kritikou I, OSA (2013) | 0.52 | 0.14 | 0.91 |
| Combined | 0.44 | 0.11 | 0.77 |

1. Crossover designed studies (analyzed using changed value)
   1. Weight
      1. Result of planned meta-analysis using random effects model

| Study | SMD | 95% Confident Interval | | % Weight |
| --- | --- | --- | --- | --- |
| O'Keeffe M (2013) | 0.77 | 0.70 | 0.84 | 25.68 |
| Buxton OM (2012) | -0.84 | -1.23 | -0.45 | 24.82 |
| Bromley LE (2012) | -0.90 | -3.29 | 1.49 | 10.90 |
| So-ngern A (2019) | 0.43 | -1.42 | 2.28 | 14.18 |
| Leproult R (2015) | 0.10 | -2.02 | 2.22 | 12.44 |
| Cros J (2019) | 0.30 | -1.89 | 2.49 | 11.98 |
| Overall effect | 0.001 | -1.039 | 1.040 | 100.0 |

Test of overall effect = 0: z = 0.001 *P* = 0.999

Cochran's Q value = 66.13 (d.f. = 5) *P* = 0.000

H = 3.64 (95% CI 1.00-7.61)

I2 (variation in SMD attributable to heterogeneity) = 92.4%

Heterogeneity variance estimates tau2 = 1.09

- - 1. Result of planned meta-analysis using fixed effects model

| Study | SMD | 95% Confident Interval | | % Weight |
| --- | --- | --- | --- | --- |
| O'Keeffe M (2013) | 0.77 | 0.70 | 0.84 | 96.66 |
| Buxton OM (2012) | -0.84 | -1.23 | -0.45 | 2.94 |
| Bromley LE (2012) | -0.90 | -3.29 | 1.49 | 0.08 |
| So-ngern A (2019) | 0.43 | -1.42 | 2.28 | 0.13 |
| Leproult R (2015) | 0.10 | -2.02 | 2.22 | 0.10 |
| Cros J (2019) | 0.30 | -1.89 | 2.49 | 0.09 |
| Overall effect | 0.720 | 0.653 | 0.787 | 100.0 |

Test of overall effect = 0: z = 21.135 *P* = 0.000

Cochran's Q value = 66.13 (d.f. = 5) *P* = 0.000

H = 3.64 (95% CI 2.75-4.47)

I2 (variation in SMD attributable to heterogeneity) = 92.4%

- - 1. Result of Egger’s test (publication bias)

| Std_Eff | Coefficient | Std. err. | t | *P* > |t| | [95% conf. interval] | |
| --- | --- | --- | --- | --- | --- | --- |
| slope | 0.81 | 0.14 | 5.88 | 0.004 | 0.43 | 1.19 |
| bias | -2.06 | 1.65 | -1.25 | 0.280 | -6.65 | 2.52 |

Test of H0: no small-study effects *P* = 0.280

- - 1. Result of influence analysis

| Study omitted | Estimate | 95% Confident Interval | |
| --- | --- | --- | --- |
| O'Keeffe M (2013) | -0.73 | -1.10 | -0.37 |
| Buxton OM (2012) | 0.77 | 0.70 | 0.83 |
| Bromley LE (2012) | 0.11 | -0.99 | 1.22 |
| So-ngern A (2019) | -0.07 | -1.22 | 1.07 |
| Leproult R (2015) | -0.01 | -1.14 | 1.11 |
| Cros J (2019) | -0.04 | -1.17 | 1.08 |
| Combined | 0.00 | -1.04 | 1.04 |

- 1. Fasting glucose
     1. Result of planned meta-analysis using random effects model

| Study | SMD | 95% Confident Interval | | % Weight |
| --- | --- | --- | --- | --- |
| Schmid SM (2007) | -0.10 | -0.26 | 0.06 | 5.90 |
| Jauch-Chara K (2010) | -0.19 | -0.82 | 0.44 | 1.03 |
| Cedernaes J (2014) | -0.20 | -0.32 | -0.08 | 6.64 |
| Benedict C (2012) | 0.10 | -0.11 | 0.31 | 4.71 |
| Costa RJ(a) (2010) | -0.30 | -0.71 | 0.11 | 2.09 |
| Costa RJ(b) (2010) | -0.60 | -1.05 | -0.15 | 1.78 |
| Wilms B (2019) | -0.16 | -0.20 | -0.12 | 8.23 |
| So-ngern A (2019) | 0.04 | -0.08 | 0.16 | 6.83 |
| Reynolds AC (2012) | -0.60 | -0.85 | -0.35 | 3.93 |
| Killick R (2015) | 0.01 | -0.89 | 0.91 | 0.53 |
| Jauch-Chara K (2010) | -0.15 | -0.67 | 0.37 | 1.43 |
| Sweeney EL (2017) | 0.10 | -0.06 | 0.26 | 5.76 |
| St-Onge MP(a) (2012) | 0.01 | -0.02 | 0.04 | 8.38 |
| St-Onge MP(b) (2012) | -0.02 | -0.09 | 0.05 | 7.80 |
| Cros J (2019) | -0.23 | -0.58 | 0.12 | 2.58 |
| Cedernaes J (2015) | 0.10 | -0.05 | 0.25 | 6.05 |
| Zuraikat FM (2024) | 0.09 | 0.07 | 0.12 | 8.41 |
| Wilms B (2019) | -0.13 | -0.17 | -0.09 | 8.23 |
| Buxton OM(a) (2012) | 0.19 | 0.05 | 0.33 | 6.21 |
| Buxton OM(b) (2012) | 0.43 | 0.15 | 0.71 | 3.50 |
| Overall effect | -0.041 | -0.109 | 0.027 | 100.0 |

Test of overall effect = 0: z = -1.181 *P* = 0.238

Cochran's Q value = 199.67 (d.f. = 19) *P* = 0.000

H = 3.24 (95% CI 1.27-5.25)

I2 (variation in SMD attributable to heterogeneity) = 90.5%

Heterogeneity variance estimates tau2 = 0.01

- - 1. Result of planned meta-analysis using fixed effects model

| Study | SMD | 95% Confident Interval | | % Weight |
| --- | --- | --- | --- | --- |
| Schmid SM (2007) | -0.10 | -0.26 | 0.06 | 0.96 |
| Jauch-Chara K (2010) | -0.19 | -0.82 | 0.44 | 0.06 |
| Cedernaes J (2014) | -0.20 | -0.32 | -0.08 | 1.51 |
| Benedict C (2012) | 0.10 | -0.11 | 0.31 | 0.53 |
| Costa RJ(a) (2010) | -0.30 | -0.71 | 0.11 | 0.14 |
| Costa RJ(b) (2010) | -0.60 | -1.05 | -0.15 | 0.11 |
| Wilms B (2019) | -0.16 | -0.20 | -0.12 | 12.23 |
| So-ngern A (2019) | 0.04 | -0.08 | 0.16 | 1.74 |
| Reynolds AC (2012) | -0.60 | -0.85 | -0.35 | 0.37 |
| Killick R (2015) | 0.01 | -0.89 | 0.91 | 0.03 |
| Jauch-Chara K (2010) | -0.15 | -0.67 | 0.37 | 0.09 |
| Sweeney EL (2017) | 0.10 | -0.06 | 0.26 | 0.89 |
| St-Onge MP(a) (2012) | 0.01 | -0.02 | 0.04 | 25.99 |
| St-Onge MP(b) (2012) | -0.02 | -0.09 | 0.05 | 4.64 |
| Cros J (2019) | -0.23 | -0.58 | 0.12 | 0.19 |
| Cedernaes J (2015) | 0.10 | -0.05 | 0.25 | 1.05 |
| Zuraikat FM (2024) | 0.09 | 0.07 | 0.12 | 35.81 |
| Wilms B (2019) | -0.13 | -0.17 | -0.09 | 12.23 |
| Buxton OM(a) (2012) | 0.19 | 0.05 | 0.33 | 1.15 |
| Buxton OM(b) (2012) | 0.43 | 0.15 | 0.71 | 0.3 |
| Overall effect | -0.004 | -0.019 | 0.011 | 100.0 |

Test of overall effect = 0: z = -0.505 *P* = 0.614

Cochran's Q value = 199.67 (d.f. = 19) *P* = 0.000

H = 3.24 (95% CI 2.80-3.67)

I2 (variation in SMD attributable to heterogeneity) = 90.5%

- - 1. Result of Egger’s test (publication bias)

| Std_Eff | Coefficient | Std. err. | t | *P* > |t| | [95% conf. interval] | |
| --- | --- | --- | --- | --- | --- | --- |
| slope | 0.02 | 0.03 | 0.56 | 0.581 | -0.05 | 0.09 |
| bias | -0.98 | 0.99 | -0.99 | 0.335 | -3.07 | 1.10 |

Test of H0: no small-study effects *P* = 0.335

- - 1. Result of influence analysis
    2. Result of influence analysis

| Study omitted | Estimate | 95% Confident Interval | |
| --- | --- | --- | --- |
| Schmid SM (2007) | -0.04 | -1.11 | 0.03 |
| Jauch-Chara K (2010) | -0.04 | -0.11 | 0.03 |
| Cedernaes J (2014) | -0.03 | -0.10 | 0.04 |
| Benedict C (2012) | -0.05 | -0.12 | 0.02 |
| Costa RJ(a) (2010) | -0.04 | -0.10 | 0.03 |
| Costa RJ(b) (2010) | -0.03 | -0.10 | 0.04 |
| Wilms B (2019) | -0.03 | -0.09 | 0.04 |
| So-ngern A (2019) | -0.05 | -0.12 | 0.02 |
| Reynolds AC (2012) | -0.02 | -0.08 | 0.05 |
| Killick R (2015) | -0.04 | -0.11 | 0.03 |
| Jauch-Chara K (2010) | -0.04 | -0.11 | 0.03 |
| Sweeney EL (2017) | -0.05 | -0.12 | 0.02 |
| St-Onge MP(a) (2012) | -0.05 | -0.13 | 0.03 |
| St-Onge MP(b) (2012) | -0.04 | -0.12 | 0.03 |
| Cros J (2019) | -0.04 | -0.10 | 0.03 |
| Cedernaes J (2015) | -0.05 | -0.12 | 0.02 |
| Zuraikat FM (2024) | -0.05 | -0.12 | 0.02 |
| Wilms B (2019) | -0.03 | -0.10 | 0.04 |
| Buxton OM(a) (2012) | -0.06 | -0.13 | 0.01 |
| Buxton OM(b) (2012) | -0.06 | -0.13 | 0.01 |
| Combined | -0.04 | -0.11 | 0.03 |

- 1. Fasting insulin
     1. Result of planned meta-analysis using random effects model

| Study | SMD | 95% Confident Interval | | % Weight |
| --- | --- | --- | --- | --- |
| Schmid SM (2007) | -1.30 | -17.42 | 14.82 | 1.58 |
| Reynolds AC (2012) | 68.10 | 36.46 | 99.74 | 0.46 |
| Rao MN (2015) | 3.40 | -7.60 | 14.40 | 2.94 |
| Killick R (2015) | 9.86 | 6.14 | 13.58 | 8.79 |
| Jauch-Chara K (2010) | -5.00 | -14.48 | 4.48 | 3.65 |
| Jauch-Chara K (2010) | -15.00 | -25.52 | -4.48 | 3.14 |
| Tajiri E (2017) | 18.80 | 3.56 | 34.04 | 1.74 |
| Sweeney EL (2017) | 9.00 | -3.40 | 21.40 | 2.45 |
| St-Onge MP(a) (2012) | -9.70 | -18.22 | -1.18 | 4.21 |
| St-Onge MP(b) (2012) | -11.10 | -20.62 | -1.58 | 3.62 |
| Buxton OM(a) (2012) | -9.80 | -13.34 | -6.26 | 9.00 |
| Buxton OM(b) (2012) | -3.12 | -6.65 | 0.41 | 9.01 |
| Benedict C (2012) | 37.00 | -44.72 | 118.72 | 0.07 |
| Cros J (2019) | 1.70 | -10.05 | 13.45 | 2.66 |
| Cedernaes J (2015) | 0.94 | -0.03 | 1.91 | 11.54 |
| Zuraikat FM (2024) | 6.80 | 5.91 | 7.69 | 11.58 |
| Wilms B (2019) | -1.45 | -1.81 | -1.09 | 11.77 |
| Wilms B (2019) | -2.51 | -2.85 | -2.17 | 11.78 |
| Overall effect | -0.323 | -2.500 | 1.855 | 100.0 |

Test of overall effect = 0: z = -0.290 *P* = 0.771

Cochran's Q value = 490.97 (d.f. = 17) *P* = 0.000

H = 5.37 (95% CI 1.00-10.27)

I2 (variation in SMD attributable to heterogeneity) = 96.5%

Heterogeneity variance estimates tau2 = 10.45

- - 1. Result of planned meta-analysis using fixed effects model

| Study | SMD | 95% Confident Interval | | % Weight |
| --- | --- | --- | --- | --- |
| Schmid SM (2007) | -1.30 | -17.42 | 14.82 | 0.02 |
| Reynolds AC (2012) | 68.10 | 36.46 | 99.74 | 0.01 |
| Rao MN (2015) | 3.40 | -7.60 | 14.40 | 0.04 |
| Killick R (2015) | 9.86 | 6.14 | 13.58 | 0.38 |
| Jauch-Chara K (2010) | -5.00 | -14.48 | 4.48 | 0.06 |
| Jauch-Chara K (2010) | -15.00 | -25.52 | -4.48 | 0.05 |
| Tajiri E (2017) | 18.80 | 3.56 | 34.04 | 0.02 |
| Sweeney EL (2017) | 9.00 | -3.40 | 21.40 | 0.03 |
| St-Onge MP(a) (2012) | -9.70 | -18.22 | -1.18 | 0.07 |
| St-Onge MP(b) (2012) | -11.10 | -20.62 | -1.58 | 0.06 |
| Buxton OM(a) (2012) | -9.80 | -13.34 | -6.26 | 0.42 |
| Buxton OM(b) (2012) | -3.12 | -6.65 | 0.41 | 0.42 |
| Benedict C (2012) | 37.00 | -44.72 | 118.72 | 0.00 |
| Cros J (2019) | 1.70 | -10.05 | 13.45 | 0.04 |
| Cedernaes J (2015) | 0.94 | -0.03 | 1.91 | 5.61 |
| Zuraikat FM (2024) | 6.80 | 5.91 | 7.69 | 6.62 |
| Wilms B (2019) | -1.45 | -1.81 | -1.09 | 40.01 |
| Wilms B (2019) | -2.51 | -2.85 | -2.17 | 46.14 |
| Overall effect | -1.262 | -1.491 | -1.033 | 100.0 |

Test of overall effect = 0: z = -10.801 P = 0.000

Cochran's Q value = 490.97 (d.f. = 17) *P* = 0.000

H = 5.37 (95% CI 4.90-5.84)

I2 (variation in SMD attributable to heterogeneity) = 96.5%

- - 1. Result of Egger’s test (publication bias)

| Std_Eff | Coefficient | Std. err. | t | *P* > |t| | [95% conf. interval] | |
| --- | --- | --- | --- | --- | --- | --- |
| slope | -1.60 | 0.74 | -2.17 | 0.045 | -3.17 | -0.04 |
| bias | 1.33 | 1.49 | 0.86 | 0.386 | -1.83 | 4.48 |

Test of H0: no small-study effects *P* = 0.386

- - 1. Result of influence analysis

| Study omitted | Estimate | 95% Confident Interval | |
| --- | --- | --- | --- |
| Schmid SM (2007) | -0.31 | -2.50 | 1.89 |
| Reynolds AC (2012) | -0.62 | -2.78 | 1.53 |
| Rao MN (2015) | -0.44 | -2.65 | 1.78 |
| Killick R (2015) | -1.30 | -3.52 | 0.93 |
| Jauch-Chara K (2010) | -0.15 | -2.37 | 2.07 |
| Jauch-Chara K (2010) | 0.15 | -2.05 | 2.36 |
| Tajiri E (2017) | -0.66 | -2.85 | 1.53 |
| Sweeney EL (2017) | -0.56 | -2.76 | 1.65 |
| St-Onge MP(a) (2012) | 0.09 | -2.13 | 2.31 |
| St-Onge MP(b) (2012) | 0.08 | -2.13 | 2.30 |
| Buxton OM(a) (2012) | 0.62 | -1.63 | 2.87 |
| Buxton OM(b) (2012) | -0.05 | -2.34 | 2.24 |
| Benedict C (2012) | -0.35 | -2.53 | 1.83 |
| Cros J (2019) | -0.38 | -2.59 | 1.83 |
| Cedernaes J (2015) | -0.49 | -2.88 | 1.90 |
| Zuraikat FM (2024) | -1.30 | -2.89 | 0.29 |
| Wilms B (2019) | -0.08 | -3.37 | 3.21 |
| Wilms B (2019) | -0.03 | -3.08 | 3.02 |
| Combined | -0.32 | -2.50 | 1.85 |

- 1. LDL (Publication bias analysis (Egger's test) could not be conducted due to limited number of included publications)
     1. Result of planned meta-analysis using random effects model

| Study | SMD | 95% Confident Interval | | % Weight |
| --- | --- | --- | --- | --- |
| Rao MN (2015) | -0.02 | -0.11 | 0.07 | 93.26 |
| O'Keeffe M (2013) | -0.19 | -0.54 | 0.16 | 6.74 |
| Overall effect | -0.031 | -0.123 | 0.060 | 100.0 |

Test of overall effect = 0: z = -0.677 *P* = 0.498

Cochran's Q value = 0.84 (d.f. = 1) *P* = 0.359

H = 0.92 (95% CI 1.00-2.06)

I2 (variation in SMD attributable to heterogeneity) = 0.0%

Heterogeneity variance estimates tau2 = 0.00

- - 1. Result of planned meta-analysis using fixed effects model

| Study | SMD | 95% Confident Interval | | % Weight |
| --- | --- | --- | --- | --- |
| Rao MN (2015) | -0.02 | -0.11 | 0.07 | 93.26 |
| O'Keeffe M (2013) | -0.19 | -0.54 | 0.16 | 6.74 |
| Overall effect | -0.031 | -0.123 | 0.060 | 100.0 |

Test of overall effect = 0: z = -0.677 P = 0.498

Cochran's Q value = 0.84 (d.f. = 1) *P* = 0.359

H = 0.92 (95% CI 1.00-2.24)

I2 (variation in SMD attributable to heterogeneity) = 0.0%

- - 1. Result of influence analysis

| Study omitted | Estimate | 95% Confident Interval | |
| --- | --- | --- | --- |
| Rao MN (2015) | -0.19 | -0.54 | 0.16 |
| O'Keeffe M (2013) | -0.02 | -0.11 | 0.07 |
| Combined | -0.03 | -0.12 | 0.06 |

- 1. HDL (Publication bias analysis (Egger's test) could not be conducted due to limited number of included publications)
     1. Result of planned meta-analysis using random effects model

| Study | SMD | 95% Confident Interval | | % Weight |
| --- | --- | --- | --- | --- |
| Rao MN (2015) | -0.02 | -0.11 | 0.07 | 51.97 |
| O'Keeffe M (2013) | -0.02 | -0.12 | 0.08 | 48.03 |
| Overall effect | -0.020 | -0.088 | 0.048 | 100.0 |

Test of overall effect = 0: z = -0.577 *P* = 0.564

Cochran's Q value = 0.00 (d.f. = 1) *P* = 1.000

H = 0.00

I2 (variation in SMD attributable to heterogeneity) = 0.0%

Heterogeneity variance estimates tau2 = 0.00

- - 1. Result of planned meta-analysis using fixed effects model

| Study | SMD | 95% Confident Interval | | % Weight |
| --- | --- | --- | --- | --- |
| Rao MN (2015) | -0.02 | -0.11 | 0.07 | 51.97 |
| O'Keeffe M (2013) | -0.02 | -0.12 | 0.08 | 48.03 |
| Overall effect | -0.020 | -0.088 | 0.048 | 100.0 |

Test of overall effect = 0: z = -0.577 *P* = 0.564

Cochran's Q value = 0.00 (d.f. = 1) *P* = 1.000

H = 0.00 (95% CI 1.00-2.24)

I2 (variation in SMD attributable to heterogeneity) = 0.0%

- - 1. Result of influence analysis

| Study omitted | Estimate | 95% Confident Interval | |
| --- | --- | --- | --- |
| Rao MN (2015) | -0.02 | -0.12 | 0.08 |
| O'Keeffe M (2013) | -0.02 | -0.11 | 0.07 |
| Combined | -0.02 | -0.09 | 0.05 |

- 1. Total cholesterol (Publication bias analysis (Egger's test) could not be conducted due to limited number of included publications)
     1. Result of planned meta-analysis using random effects model

| Study | SMD | 95% Confident Interval | | % Weight |
| --- | --- | --- | --- | --- |
| Rao MN (2015) | -0.13 | -0.32 | 0.06 | 77.20 |
| O'Keeffe M (2013) | -0.25 | -0.60 | 0.10 | 22.80 |
| Overall effect | -0.157 | -0.323 | 0.008 | 100.0 |

Test of overall effect = 0: z = -1.861 *P* = 0.063

Cochran's Q value = 0.35 (d.f. = 1) *P* = 0.552

H = 0.60 (95% CI 1.00-1.34)

I2 (variation in SMD attributable to heterogeneity) = 0.0%

Heterogeneity variance estimates tau2 = 0.00

- - 1. Result of planned meta-analysis using fixed effects model

| Study | SMD | 95% Confident Interval | | % Weight |
| --- | --- | --- | --- | --- |
| Rao MN (2015) | -0.13 | -0.32 | 0.06 | 77.20 |
| O'Keeffe M (2013) | -0.25 | -0.60 | 0.10 | 22.80 |
| Overall effect | -0.157 | -0.323 | 0.008 | 100.0 |

Test of overall effect = 0: z = -1.861 *P* = 0.063

Cochran's Q value = 0.35 (d.f. = 1) *P* = 0.552

H = 0.60 (95% CI 1.00-2.24)

I2 (variation in SMD attributable to heterogeneity) = 0.0%

- - 1. Result of influence analysis

| Study omitted | Estimate | 95% Confident Interval | |
| --- | --- | --- | --- |
| Rao MN (2015) | -0.25 | -0.60 | 0.10 |
| O'Keeffe M (2013) | -0.13 | -0.32 | 0.06 |
| Combined | -0.16 | -0.32 | 0.01 |

- 1. Total triglycerides
     1. Result of planned meta-analysis using random effects model

| Study | SMD | 95% Confident Interval | | % Weight |
| --- | --- | --- | --- | --- |
| Reynolds AC (2012) | -0.16 | -0.25 | -0.07 | 43.02 |
| Rao MN (2015) | -0.30 | -0.47 | -0.13 | 24.88 |
| O'Keeffe M (2013) | -0.07 | -1.13 | 0.99 | 1.09 |
| Cros J (2019) | -0.04 | -0.18 | 0.10 | 31.00 |
| Overall effect | -0.157 | -0.268 | -0.045 | 100.0 |

Test of overall effect = 0: z = -2.759 *P* = 0.006

Cochran's Q value = 5.27 (d.f. = 3) *P* = 0.153

H = 1.33 (95% CI 1.00-2.39)

I2 (variation in SMD attributable to heterogeneity) = 43.1%

Heterogeneity variance estimates tau2 = 0.01

- - 1. Result of planned meta-analysis using fixed effects model

| Study | SMD | 95% Confident Interval | | % Weight |
| --- | --- | --- | --- | --- |
| Reynolds AC (2012) | -0.16 | -0.25 | -0.07 | 57.18 |
| Rao MN (2015) | -0.30 | -0.47 | -0.13 | 17.01 |
| O'Keeffe M (2013) | -0.07 | -1.13 | 0.99 | 0.46 |
| Cros J (2019) | -0.04 | -0.18 | 0.10 | 25.35 |
| Overall effect | -0.153 | -0.224 | -0.082 | 100.0 |

Test of overall effect = 0: z = -4.21 *P* = 0.000

Cochran's Q value = 5.27 (d.f. = 3) *P* = 0.153

H = 1.33 (95% CI 1.00-2.24)

I2 (variation in SMD attributable to heterogeneity) = 43.1%

- - 1. Result of Egger’s test (publication bias)

| Std_Eff | Coefficient | Std. err. | t | *P* > |t| | [95% conf. interval] | |
| --- | --- | --- | --- | --- | --- | --- |
| slope | -0.15 | 0.12 | -1.23 | 0.344 | -0.66 | 0.37 |
| bias | -0.10 | 1.64 | -0.06 | 0.958 | -7.17 | 6.97 |

Test of H0: no small-study effects *P* = 0.958

- - 1. Result of influence analysis

| Study omitted | Estimate | 95% Confident Interval | |
| --- | --- | --- | --- |
| Reynolds AC (2012) | -0.16 | -0.38 | 0.06 |
| Rao MN (2015) | -0.12 | -0.20 | -0.04 |
| O'Keeffe M (2013) | -0.16 | -0.28 | -0.03 |
| Cros J (2019) | -0.19 | -0.27 | -0.11 |
| Combined | -0.16 | -0.27 | -0.05 |

- 1. Fasting ghrelin
     1. Result of planned meta-analysis using random effects model

| Study | SMD | 95% Confident Interval | | % Weight |
| --- | --- | --- | --- | --- |
| Schüssler P (2006) | -55.25 | -113.98 | 3.48 | 14.72 |
| Liu PY (2021) | 43.19 | -20.00 | 106.38 | 13.60 |
| Killick R (2015) | -55.00 | -245.56 | 135.56 | 2.48 |
| Hogenkamp PS (2013) | 52.00 | 6.68 | 97.32 | 18.62 |
| St-Onge MP(a) (2012) | 42.10 | 1.87 | 82.33 | 20.30 |
| St-Onge MP(b) (2012) | 28.00 | -91.59 | 147.59 | 5.59 |
| Chapman CD (2013) | 167.98 | -42.10 | 378.06 | 2.07 |
| Qian J (2019) | 1.21 | -32.34 | 34.76 | 22.62 |
| Overall effect | 19.927 | -11.364 | 51.218 | 100.0 |

Test of overall effect = 0: z = 1.248 *P* = 0.212

Cochran's Q value = 13.62 (d.f. = 7) *P* = 0.058

H = 1.395 (95% CI 1.00-2.17)

I2 (variation in SMD attributable to heterogeneity) = 48.6%

Heterogeneity variance estimates tau2 = 834.07

- - 1. Result of planned meta-analysis using fixed effects model

| Study | SMD | 95% Confident Interval | | % Weight |
| --- | --- | --- | --- | --- |
| Schüssler P (2006) | -55.25 | -113.98 | 3.48 | 10.93 |
| Liu PY (2021) | 43.19 | -20.00 | 106.38 | 9.44 |
| Killick R (2015) | -55.00 | -245.56 | 135.56 | 1.04 |
| Hogenkamp PS (2013) | 52.00 | 6.68 | 97.32 | 18.34 |
| St-Onge MP(a) (2012) | 42.10 | 1.87 | 82.33 | 23.28 |
| St-Onge MP(b) (2012) | 28.00 | -91.59 | 147.59 | 2.63 |
| Chapman CD (2013) | 167.98 | -42.10 | 378.06 | 0.85 |
| Qian J (2019) | 1.21 | -32.34 | 34.76 | 33.48 |
| Overall effect | 19.388 | -0.024 | 38.800 | 100.0 |

Test of overall effect = 0: z = 1.957 P = 0.050

Cochran's Q value = 13.62 (d.f. = 7) *P* = 0.058

H = 1.40 (95% CI 1.00-2.01)

I2 (variation in SMD attributable to heterogeneity) = 48.6%

- - 1. Result of Egger’s test (publication bias)

| Std_Eff | Coefficient | Std. err. | t | *P* > |t| | [95% conf. interval] | |
| --- | --- | --- | --- | --- | --- | --- |
| slope | 13.14 | 31.06 | 0.42 | 0.687 | -62.85 | 89.14 |
| bias | 0.25 | 1.11 | 0.23 | 0.827 | -2.46 | 2.97 |

Test of H0: no small-study effects *P* = 0.827

- - 1. Result of influence analysis

| Study omitted | Estimate | 95% Confident Interval | |
| --- | --- | --- | --- |
| Schüssler P (2006) | 29.80 | 7.01 | 52.58 |
| Liu PY (2021) | 16.25 | -19.56 | 52.06 |
| Killick R (2015) | 21.93 | -10.47 | 54.32 |
| Hogenkamp PS (2013) | 12.62 | -22.44 | 47.68 |
| St-Onge MP(a) (2012) | 14.58 | -23.04 | 52.21 |
| St-Onge MP(b) (2012) | 19.48 | -14.51 | 53.46 |
| Chapman CD (2013) | 16.97 | -13.44 | 47.39 |
| Qian J (2019) | 25.16 | -13.73 | 64.05 |
| Combined | 19.93 | -11.36 | 51.22 |

- 1. Fasting leptin
     1. Result of planned meta-analysis using random effects model

| Study | SMD | 95% Confident Interval | | % Weight |
| --- | --- | --- | --- | --- |
| Reynolds AC (2012) | 0.50 | 0.29 | 0.71 | 25.60 |
| Liu PY (2021) | 1.40 | 0.22 | 2.58 | 10.92 |
| Killick R (2015) | 1.69 | 0.79 | 2.59 | 14.50 |
| Tajiri E (2017) | 0.80 | -1.36 | 2.96 | 4.58 |
| St-Onge MP(a) (2012) | -0.10 | -0.31 | 0.11 | 25.60 |
| St-Onge MP(b) (2012) | -1.50 | -3.84 | 0.84 | 4.00 |
| Buxton OM(a) (2012) | 0.97 | -1.52 | 3.46 | 3.58 |
| Buxton OM(b) (2012) | -0.34 | -1.49 | 0.81 | 11.22 |
| Overall effect | 0.474 | -0.033 | 0.980 | 100.0 |

Test of overall effect = 0: z = 1.832 *P* = 0.067

Cochran's Q value = 33.38 (d.f. = 7) *P* = 0.000

H = 2.184 (95% CI 1.00-4.17)

I2 (variation in SMD attributable to heterogeneity) = 79.0%

Heterogeneity variance estimates tau2 = 0.25

- - 1. Result of planned meta-analysis using fixed effects model

| Study | SMD | 95% Confident Interval | | % Weight |
| --- | --- | --- | --- | --- |
| Reynolds AC (2012) | 0.50 | 0.29 | 0.71 | 46.66 |
| Liu PY (2021) | 1.40 | 0.22 | 2.58 | 1.47 |
| Killick R (2015) | 1.69 | 0.79 | 2.59 | 2.52 |
| Tajiri E (2017) | 0.80 | -1.36 | 2.96 | 0.44 |
| St-Onge MP(a) (2012) | -0.10 | -0.31 | 0.11 | 46.66 |
| St-Onge MP(b) (2012) | -1.50 | -3.84 | 0.84 | 0.37 |
| Buxton OM(a) (2012) | 0.97 | -1.52 | 3.46 | 0.33 |
| Buxton OM(b) (2012) | -0.34 | -1.49 | 0.81 | 1.54 |
| Overall effect | 0.246 | 0.103 | 0.389 | 100.0 |

Test of overall effect = 0: z = 3.366 P = 0.001

Cochran's Q value = 33.38 (d.f. = 7) *P* = 0.000

H = 2.18 (95% CI 1.46-2.86)

I2 (variation in SMD attributable to heterogeneity) = 79.0%

- - 1. Result of Egger’s test (publication bias)

| Std_Eff | Coefficient | Std. err. | t | *P* > |t| | [95% conf. interval] | |
| --- | --- | --- | --- | --- | --- | --- |
| slope | 0.15 | 0.23 | 0.65 | 0.543 | -0.42 | 0.72 |
| bias | 0.67 | 1.12 | 0.69 | 0.569 | -2.07 | 3.42 |

Test of H0: no small-study effects *P* = 0.569

- - 1. Result of influence analysis

| Study omitted | Estimate | 95% Confident Interval | |
| --- | --- | --- | --- |
| Reynolds AC (2012) | 0.49 | -0.34 | 1.31 |
| Liu PY (2021) | 0.36 | -0.16 | 0.88 |
| Killick R (2015) | 0.26 | -0.22 | 0.74 |
| Tajiri E (2017) | 0.46 | -0.07 | 0.99 |
| St-Onge MP(a) (2012) | 0.66 | 0.02 | 1.31 |
| St-Onge MP(b) (2012) | 0.55 | 0.04 | 1.06 |
| Buxton OM(a) (2012) | 0.46 | -0.07 | 0.98 |
| Buxton OM(b) (2012) | 0.58 | 0.03 | 1.12 |
| Combined | 0.47 | -0.03 | 0.98 |

- 1. 24h average leptin
     1. Result of planned meta-analysis using random effects model

| Study | SMD | 95% Confident Interval | | % Weight |
| --- | --- | --- | --- | --- |
| Pejovic S (2010) | 2.27 | 0.88 | 3.66 | 25.14 |
| Broussard JL (2016) | 0.20 | -0.79 | 1.19 | 31.74 |
| Benedict C (2012) | 0.02 | -0.10 | 0.14 | 43.12 |
| Overall effect | 0.643 | -0.433 | 1.719 | 100.0 |

Test of overall effect = 0: z = 1.171 *P* = 0.242

Cochran's Q value = 10.07 (d.f. = 2) *P* = 0.007

H = 2.24 (95% CI 1.00-4.49)

I2 (variation in SMD attributable to heterogeneity) = 80.1%

Heterogeneity variance estimates tau2 = 0.69

- - 1. Result of planned meta-analysis using fixed effects model

| Study | SMD | 95% Confident Interval | | % Weight |
| --- | --- | --- | --- | --- |
| Pejovic S (2010) | 2.27 | 0.88 | 3.66 | 0.78 |
| Broussard JL (2016) | 0.20 | -0.79 | 1.19 | 1.53 |
| Benedict C (2012) | 0.02 | -0.10 | 0.14 | 97.69 |
| Overall effect | 0.040 | -0.082 | 0.163 | 100.0 |

Test of overall effect = 0: z = 0.643 P = 0.520

Cochran's Q value = 10.07 (d.f. = 2) *P* = 0.007

H = 2.24 (95% CI 1.00-3.49)

I2 (variation in SMD attributable to heterogeneity) = 80.1%

- - 1. Result of Egger’s test (publication bias)

| Std_Eff | Coefficient | Std. err. | t | *P* > |t| | [95% conf. interval] | |
| --- | --- | --- | --- | --- | --- | --- |
| slope | -0.11 | 0.17 | -0.66 | 0.629 | -2.24 | 2.02 |
| bias | 2.01 | 1.55 | 1.30 | 0.418 | -17.70 | 21.72 |

Test of H0: no small-study effects *P* = 0.418

- - 1. Result of influence analysis

| Study omitted | Estimate | 95% Confident Interval | |
| --- | --- | --- | --- |
| Pejovic S (2010) | 0.02 | -0.10 | 0.15 |
| Broussard JL (2016) | 1.03 | -1.16 | 3.23 |
| Benedict C (2012) | 1.17 | -0.85 | 3.20 |
| Combined | 0.64 | -0.43 | 1.72 |

- 1. Fasting cortisol
     1. Result of planned meta-analysis using random effects model

| Study | SMD | 95% Confident Interval | | % Weight |
| --- | --- | --- | --- | --- |
| Schüssler P (2006) | -1.57 | -10.27 | 7.13 | 17.83 |
| Schmid SM (2007) | 35.80 | 4.75 | 66.85 | 12.17 |
| Reynolds AC (2012) | 16.40 | 8.07 | 24.73 | 17.89 |
| Liu PY (2021) | -29.40 | -36.81 | -21.99 | 18.03 |
| Killick R (2015) | 15.00 | 0.24 | 29.76 | 16.60 |
| Tajiri E (2017) | 14.00 | 3.22 | 24.78 | 17.47 |
| Overall effect | 6.647 | -11.812 | 25.106 | 100.0 |

Test of overall effect = 0: z = 0.706 *P* = 0.480

Cochran's Q value = 90.43 (d.f. = 5) *P* = 0.000

H = 4.253 (95% CI 1.42-7.17)

I2 (variation in SMD attributable to heterogeneity) = 94.5%

Heterogeneity variance estimates tau2 = 477.62

- - 1. Result of planned meta-analysis using fixed effects model

| Study | SMD | 95% Confident Interval | | % Weight |
| --- | --- | --- | --- | --- |
| Schüssler P (2006) | -1.57 | -10.27 | 7.13 | 21.98 |
| Schmid SM (2007) | 35.80 | 4.75 | 66.85 | 1.73 |
| Reynolds AC (2012) | 16.40 | 8.07 | 24.73 | 24.01 |
| Liu PY (2021) | -29.40 | -36.81 | -21.99 | 30.30 |
| Killick R (2015) | 15.00 | 0.24 | 29.76 | 7.65 |
| Tajiri E (2017) | 14.00 | 3.22 | 24.78 | 14.33 |
| Overall effect | -1.545 | -5.626 | 2.536 | 100.0 |

Test of overall effect = 0: z = -0.742 P = 0.458

Cochran's Q value = 90.43 (d.f. = 5) *P* = 0.000

H = 4.25 (95% CI 3.36-5.10)

I2 (variation in SMD attributable to heterogeneity) = 94.5%

- - 1. Result of Egger’s test (publication bias)

| Std_Eff | Coefficient | Std. err. | t | *P* > |t| | [95% conf. interval] | |
| --- | --- | --- | --- | --- | --- | --- |
| slope | -29.30 | 24.24 | -1.21 | 0.293 | -96.59 | 37.99 |
| bias | 5.81 | 4.75 | 1.22 | 0.289 | -7.39 | 19.00 |

Test of H0: no small-study effects *P* = 0.289

- - 1. Result of influence analysis

| Study omitted | Estimate | 95% Confident Interval | |
| --- | --- | --- | --- |
| Schüssler P (2006) | 8.88 | -14.97 | 32.74 |
| Schmid SM (2007) | 2.60 | -16.83 | 22.03 |
| Reynolds AC (2012) | 4.61 | -16.28 | 25.51 |
| Liu PY (2021) | 12.44 | 2.86 | 22.01 |
| Killick R (2015) | 5.09 | -15.79 | 25.97 |
| Tajiri E (2017) | 5.28 | -16.21 | 26.77 |
| Combined | 6.65 | -11.81 | 25.11 |

- 1. 24h average cortisol (Publication bias analysis (Egger's test) could not be conducted due to limited number of included publications)
     1. Result of planned meta-analysis using random effects model

| Study | SMD | 95% Confident Interval | | % Weight |
| --- | --- | --- | --- | --- |
| Pejovic S (2010) | -410.00 | -521.20 | -298.80 | 32.29 |
| Costa RJ(a) (2010) | -21.75 | -97.26 | 53.76 | 33.86 |
| Costa RJ(b) (2010) | -21.75 | 97.26 | 53.76 | 33.86 |
| Overall effect | -147.110 | -362.714 | 68.494 | 100.0 |

Test of overall effect = 0: z = -1.337 *P* = 0.181

Cochran's Q value = 38.05 (d.f. = 2) *P* = 0.000

H = 4.6 (95% CI 1.00-8.50)

I2 (variation in SMD attributable to heterogeneity) = 94.7%

Heterogeneity variance estimates tau2 = 3.4e4

- - 1. Result of planned meta-analysis using fixed effects model

| Study | SMD | 95% Confident Interval | | % Weight |
| --- | --- | --- | --- | --- |
| Pejovic S (2010) | -410.00 | -521.20 | -298.80 | 18.74 |
| Costa RJ(a) (2010) | -21.75 | -97.26 | 53.76 | 40.63 |
| Costa RJ(b) (2010) | -21.75 | 97.26 | 53.76 | 40.63 |
| Overall effect | -94.489 | -142.621 | -46.356 | 100.0 |

Test of overall effect = 0: z = -3.848 P = 0.000

Cochran's Q value = 38.05 (d.f. = 2) *P* = 0.000

H = 4.36 (95% CI 2.93-5.68)

I2 (variation in SMD attributable to heterogeneity) = 94.7%

- - 1. Result of influence analysis

| Study omitted | Estimate | 95% Confident Interval | |
| --- | --- | --- | --- |
| Pejovic S (2010) | -21.75 | -75.14 | 31.64 |
| Costa RJ(a) (2010) | -213.64 | -594.09 | 166.81 |
| Costa RJ(b) (2010) | -213.64 | -594.09 | 166.81 |
| Combined | -147.11 | -362.71 | 68.49 |
