# Supplementary material
Source: Research Square preprint supplement (doi:10.21203/rs.3.rs-9056648/v1)
Supplement: Supplementary file 3 [file 5a76b880f0186cbab37900a3.doc]

**Supplementary Appendix 1 - Search terms and search strategies**

**Search terms (MeSH terms and entry terms)**

**P (Population)**

- Sleep Wake Disorders
- Disorder, Sleep Wake
- Disorders, Sleep Wake
- Sleep Wake Disorder
- Wake Disorder, Sleep
- Wake Disorders, Sleep
- REM Sleep Parasomnias
- Parasomnia, REM Sleep
- REM Sleep Parasomnia
- Parasomnias, REM Sleep
- Rapid Eye Movement Sleep Parasomnias
- Sleep, REM, Parasomnias
- Sleep-Wake Transition Disorders
- Sleep-Wake Transition Disorder
- Sleep Wake Transition Disorders
- Transition Disorder, Sleep-Wake
- Sleep-Wake Transitional Disorders
- Sleep-Wake Transitional Disorder
- Sleep Arousal Disorders
- Arousal Disorder, Sleep
- Sleep Arousal Disorder
- Arousal Disorders, Sleep
- Confusional Arousals
- Arousal, Confusional
- Sleep Disorders, Intrinsic
- Intrinsic Sleep Disorder
- Sleep Disorder, Intrinsic
- Intrinsic Sleep Disorders
- Sleep State Misperception
- Sleep State Misperceptions
- Sleep Paralysis
- Paralysis, Sleep
- REM Sleep Behavior Disorder
- Behavior Disorder, Rapid Eye Movement Sleep
- Behavior Disorder, REM
- Behavior Disorders, REM
- REM Behavior Disorders
- Rapid Eye Movement Sleep Behavior Disorder
- Sleep Disorders, Circadian Rhythm
- Circadian Rhythm Sleep Disorder
- Sleep-Wake Schedule Disorders
- Sleep Wake Schedule Disorders
- Sleep-Wake Cycle Disorders
- Sleep Wake Cycle Disorders
- Sleep Apnea Syndromes
- Apnea Syndrome, Sleep
- Apnea Syndromes, Sleep
- Sleep Apnea Syndrome
- Apnea, Sleep
- Apneas, Sleep
- Sleep Apnea, Obstructive
- Apneas, Obstructive Sleep
- Obstructive Sleep Apneas
- Sleep Apneas, Obstructive
- Apnea, Obstructive Sleep
- Sleep Apnea Hypopnea Syndrome
- Sleep Deprivation
- Deprivation, Sleep
- Insufficient Sleep Syndrome
- Insufficient Sleep Syndromes
- Syndrome, Insufficient Sleep
- REM Sleep Deprivation

**O (Outcome)**

- Metabolic Diseases
- Disease, Metabolic
- Metabolic Disease
- Diseases, Metabolic
- Thesaurismosis
- Thesaurismoses
- Lipid Metabolism Disorders
- Lipid Metabolism Disorder
- Metabolism Disorder, Lipid
- Metabolism Disorders, Lipid
- Glucose Metabolism Disorders
- Disorder, Glucose Metabolism
- Disorders, Glucose Metabolism
- Metabolism Disorder, Glucose
- Metabolism Disorders, Glucose
- Glucose Metabolic Disorder
- Ghrelin
- Appetite-Regulating Hormone
- Appetite Regulating Hormone
- Gastric MLTRP
- Motilin-Related Peptide
- Motilin Related Peptide
- Orexins
- Hypocretin
- Orexin
- Orexin A
- Hypocretin 1
- Orexin B
- Leptin
- Ob Gene Product
- Gene Product, Ob
- Ob Protein
- Obese Gene Product
- Gene Product, Obese
- Obesity
- Body Weight
- Body Weights
- Weight, Body
- Weights, Body
- Waist Circumference
- Circumferences, Waist
- Circumference, Waist
- Waist Circumferences

**Search strategy**

| **Search** | **PubMed** |
| --- | --- |
| #1 | ((((((((((Sleep Wake Disorders[MeSH Terms]) OR (REM Sleep Parasomnias[MeSH Terms])) OR (Sleep-Wake Transition Disorders[MeSH Terms])) OR (Sleep Arousal Disorders[MeSH Terms])) OR (Sleep Disorders, Intrinsic[MeSH Terms])) OR (Sleep Paralysis[MeSH Terms])) OR (REM Sleep Behavior Disorder[MeSH Terms])) OR (Sleep Disorders, Circadian Rhythm[MeSH Terms])) OR (Sleep Apnea Syndromes[MeSH Terms])) OR (Sleep Apnea, Obstructive[MeSH Terms])) OR (Sleep Deprivation[MeSH Terms]) |
| #2 | (((((((((((((((((((((((((((((((((((((((((((((Disorder, Sleep Wake) OR (Disorders, Sleep Wake)) OR (Sleep Wake Disorder)) OR (Wake Disorder, Sleep)) OR (Wake Disorders, Sleep)) OR (Parasomnia, REM Sleep)) OR (REM Sleep Parasomnia)) OR (Parasomnias, REM Sleep)) OR (Rapid Eye Movement Sleep Parasomnias)) OR (Sleep, REM, Parasomnias)) OR (Sleep-Wake Transition Disorder)) OR (Sleep Wake Transition Disorders)) OR (Transition Disorder, Sleep-Wake)) OR (Sleep-Wake Transitional Disorders)) OR (Sleep-Wake Transitional Disorder)) OR (Arousal Disorder, Sleep)) OR (Sleep Arousal Disorder)) OR (Arousal Disorders, Sleep)) OR (Confusional Arousals)) OR (Arousal, Confusional)) OR (Intrinsic Sleep Disorder)) OR (Sleep Disorder, Intrinsic)) OR (Intrinsic Sleep Disorders)) OR (Sleep State Misperception)) OR (Sleep State Misperceptions)) OR (Paralysis, Sleep)) OR (Behavior Disorder, Rapid Eye Movement Sleep)) OR (Behavior Disorder, REM)) OR (Behavior Disorders, REM)) OR (REM Behavior Disorders)) OR (Rapid Eye Movement Sleep Behavior Disorder)) OR (Circadian Rhythm Sleep Disorder)) OR (Sleep-Wake Schedule Disorders)) OR (Sleep Wake Schedule Disorders)) OR (Sleep-Wake Cycle Disorders)) OR (Sleep Wake Cycle Disorders)) OR (Apnea Syndrome, Sleep)) OR (Apnea Syndromes, Sleep)) OR (Sleep Apnea Syndrome)) OR (Apnea, Sleep)) OR (Apneas, Sleep)) OR (Apneas, Obstructive Sleep)) OR (Obstructive Sleep Apneas)) OR (Sleep Apneas, Obstructive)) OR (Apnea, Obstructive Sleep)) OR (Sleep Apnea Hypopnea Syndrome) |
| #3 | (#1) OR (#2) |
| #4 | ((((((((Metabolic Diseases[MeSH Terms]) OR (Lipid Metabolism Disorders[MeSH Terms])) OR (Glucose Metabolism Disorders[MeSH Terms])) OR (Ghrelin[MeSH Terms])) OR (Orexins[MeSH Terms])) OR (Leptin[MeSH Terms])) OR (Obesity[MeSH Terms])) OR (Body Weight[MeSH Terms])) OR (Waist Circumference[MeSH Terms]) |
| #5 | (((((((((((((((((((((((((((((((((Disease, Metabolic) OR (Metabolic Disease)) OR (Diseases, Metabolic)) OR (Thesaurismosis)) OR (Thesaurismoses)) OR (Lipid Metabolism Disorder)) OR (Metabolism Disorder, Lipid)) OR (Metabolism Disorders, Lipid)) OR (Disorder, Glucose Metabolism)) OR (Disorders, Glucose Metabolism)) OR (Metabolism Disorder, Glucose)) OR (Metabolism Disorders, Glucose)) OR (Glucose Metabolic Disorder)) OR (Appetite-Regulating Hormone)) OR (Appetite Regulating Hormone)) OR (Gastric MLTRP)) OR (Motilin-Related Peptide)) OR (Motilin Related Peptide)) OR (Hypocretin)) OR (Orexin)) OR (Orexin A)) OR (Hypocretin 1)) OR (Orexin B)) OR (Ob Gene Product)) OR (Gene Product, Ob)) OR (Ob Protein)) OR (Obese Gene Product)) OR (Gene Product, Obese)) OR (Body Weights)) OR (Weight, Body)) OR (Weights, Body)) OR (Circumferences, Waist)) OR (Circumference, Waist)) OR (Waist Circumferences) |
| #6 | (#4) OR (#5) |
| #7 (18965 records) | (#3) AND (#6) |
| **Search** | **Embase** |
| #1 | 'sleep wake disorders'/exp OR 'rem sleep parasomnias' OR 'sleep-wake transition disorders' OR 'sleep arousal disorders' OR 'sleep disorders, intrinsic' OR 'sleep paralysis' OR 'rem sleep behavior disorder' OR 'sleep disorders, circadian rhythm' OR 'sleep apnea syndromes' OR 'sleep apnea, obstructive' OR 'sleep deprivation' OR (disorder AND sleep wake) OR (disorders AND sleep AND wake) OR (sleep AND wake AND disorder) OR (wake AND disorder AND sleep) OR (wake AND disorders AND sleep) OR (parasomnia AND rem sleep) OR (rem AND sleep AND parasomnia) OR (parasomnias AND rem sleep) OR (rapid AND eye AND movement AND sleep AND parasomnias) OR (sleep AND rem AND parasomnias) OR (sleep-wake AND transition AND disorder) OR (sleep AND wake AND transition AND disorders) OR (transition AND disorder AND sleep-wake) OR (sleep-wake AND transitional AND disorders) OR (sleep-wake AND transitional AND disorder) OR (arousal AND disorder AND sleep) OR (sleep AND arousal AND disorder) OR (arousal AND disorders AND sleep) OR (confusional AND arousals) OR (arousal AND confusional) OR (intrinsic AND sleep AND disorder) OR (sleep AND disorder AND intrinsic) OR (intrinsic AND sleep AND disorders) OR (sleep AND state AND misperception) OR (sleep AND state AND misperceptions) OR (paralysis AND sleep) OR (behavior AND disorder AND rapid AND eye AND movement AND sleep) OR (behavior AND disorder AND rem) OR (behavior AND disorders AND rem) OR (rem AND behavior AND disorders) OR (rapid AND eye AND movement AND sleep AND behavior AND disorder) OR (circadian AND rhythm AND sleep AND disorder) OR (sleep-wake AND schedule AND disorders) OR (sleep AND wake AND schedule AND disorders) OR (sleep-wake AND cycle AND disorders) OR (sleep AND wake AND cycle AND disorders) OR (apnea AND syndrome AND sleep) OR (apnea AND syndromes AND sleep) OR (sleep AND apnea AND syndrome) OR (apnea AND sleep) OR (apneas AND sleep) OR (obstructive AND sleep AND apneas) OR (sleep AND apneas AND obstructive) OR (apnea AND obstructive AND sleep) OR (sleep AND apnea AND hypopnea AND syndrome) OR (deprivation AND sleep) OR (insufficient AND sleep AND syndrome) OR (insufficient AND sleep AND syndromes) OR (syndrome AND insufficient AND sleep) OR (rem AND sleep AND deprivation) |
| #2 | 'metabolic diseases'/exp OR 'lipid metabolism disorders' OR 'glucose metabolism disorders' OR ghrelin OR orexins OR leptin OR obesity OR 'body weight' OR 'waist circumference' OR (disease AND metabolic) OR (metabolic AND disease) OR (diseases AND metabolic) OR thesaurismosis OR thesaurismoses OR (lipid AND metabolism AND disorder) OR (metabolism AND disorder AND lipid) OR (metabolism AND disorders AND lipid) OR (disorder AND glucose AND metabolism) OR (disorders AND glucose AND metabolism) OR (metabolism AND disorder AND glucose) OR (metabolism AND disorders AND glucose) OR (glucose AND metabolic AND disorder) OR (appetite-regulating AND hormone) OR (appetite AND regulating AND hormone) OR (gastric AND mltrp) OR (motilin-related AND peptide) OR (motilin AND related AND peptide) OR hypocretin OR orexin OR (orexin AND a) OR 'hypocretin 1' OR (orexin AND b) OR (ob AND gene AND product) OR (gene AND product AND ob) OR (ob AND protein) OR (obese AND gene AND product) OR (gene AND product AND obese) OR (body AND weights) OR (weight AND body) OR (weights AND body) OR (circumferences AND waist) OR (circumference AND waist) OR (waist AND circumferences) |
| #3 (121775 records) | (#1) AND (#2) |
| **Search** | **Cochrane Library** |
| #1 | (Sleep Wake Disorders):ti,ab,kw OR (Disorder, Sleep Wake):ti,ab,kw OR (Disorders, Sleep Wake):ti,ab,kw OR (Sleep Wake Disorder):ti,ab,kw OR (Wake Disorder, Sleep):ti,ab,kw (Word variations have been searched) |
| #2 | (Wake Disorders, Sleep):ti,ab,kw OR (REM Sleep Parasomnias):ti,ab,kw OR (Parasomnia, REM Sleep):ti,ab,kw OR (REM Sleep Parasomnia):ti,ab,kw OR (Parasomnias, REM Sleep):ti,ab,kw (Word variations have been searched) |
| #3 | (Rapid Eye Movement Sleep Parasomnias):ti,ab,kw OR (Sleep, REM, Parasomnias):ti,ab,kw OR (Sleep-Wake Transition Disorders):ti,ab,kw OR (Sleep-Wake Transition Disorder):ti,ab,kw OR (Sleep Wake Transition Disorders):ti,ab,kw (Word variations have been searched) |
| #4 | (Transition Disorder, Sleep-Wake):ti,ab,kw OR (Sleep-Wake Transitional Disorders):ti,ab,kw OR (Sleep-Wake Transitional Disorder):ti,ab,kw OR (Sleep Arousal Disorders):ti,ab,kw OR (Arousal Disorder, Sleep):ti,ab,kw (Word variations have been searched) |
| #5 | (Sleep Arousal Disorder):ti,ab,kw OR (Arousal Disorders, Sleep):ti,ab,kw OR (Confusional Arousals):ti,ab,kw OR (Arousal, Confusional):ti,ab,kw OR (Sleep Disorders, Intrinsic):ti,ab,kw (Word variations have been searched) |
| #6 | (Intrinsic Sleep Disorder):ti,ab,kw OR (Sleep Disorder, Intrinsic):ti,ab,kw OR (Intrinsic Sleep Disorders):ti,ab,kw OR (Sleep State Misperception):ti,ab,kw OR (Sleep State Misperceptions):ti,ab,kw (Word variations have been searched) |
| #7 | (Sleep Paralysis):ti,ab,kw OR (Paralysis, Sleep):ti,ab,kw OR (REM Sleep Behavior Disorder):ti,ab,kw OR (Behavior Disorder, Rapid Eye Movement Sleep):ti,ab,kw OR (Behavior Disorder, REM):ti,ab,kw (Word variations have been searched) |
| #8 | (Behavior Disorders, REM):ti,ab,kw OR (REM Behavior Disorders):ti,ab,kw OR (Rapid Eye Movement Sleep Behavior Disorder):ti,ab,kw OR (Sleep Disorders, Circadian Rhythm):ti,ab,kw OR (Circadian Rhythm Sleep Disorder):ti,ab,kw (Word variations have been searched) |
| #9 | (Sleep-Wake Schedule Disorders):ti,ab,kw OR (Sleep Wake Schedule Disorders):ti,ab,kw OR (Sleep-Wake Cycle Disorders):ti,ab,kw OR (Sleep Wake Cycle Disorders):ti,ab,kw OR (Sleep Apnea Syndromes):ti,ab,kw (Word variations have been searched) |
| #10 | (Apnea Syndrome, Sleep):ti,ab,kw OR (Apnea Syndromes, Sleep):ti,ab,kw OR (Sleep Apnea Syndrome):ti,ab,kw OR (Apnea, Sleep):ti,ab,kw OR (Apneas, Sleep):ti,ab,kw (Word variations have been searched) |
| #11 | (Sleep Apnea, Obstructive):ti,ab,kw OR (Apneas, Obstructive Sleep):ti,ab,kw OR (Obstructive Sleep Apneas):ti,ab,kw OR (Sleep Apneas, Obstructive):ti,ab,kw OR (Apnea, Obstructive Sleep):ti,ab,kw (Word variations have been searched) |
| #12 | (Sleep Apnea Hypopnea Syndrome):ti,ab,kw OR (Sleep Deprivation):ti,ab,kw OR (Deprivation, Sleep):ti,ab,kw OR (Insufficient Sleep Syndrome):ti,ab,kw OR (Insufficient Sleep Syndromes):ti,ab,kw (Word variations have been searched) |
| #13 | (Syndrome, Insufficient Sleep):ti,ab,kw OR (REM Sleep Deprivation):ti,ab,kw (Word variations have been searched) |
| #14 | (#1) OR (#2) OR (#3) OR (#4) OR (#5) OR (#6) OR (#7) OR (#8) OR (#9) OR (#10) OR (#11) OR (#12) OR (#13) |
| #15 | (Metabolic Diseases):ti,ab,kw OR (Disease, Metabolic):ti,ab,kw OR (Metabolic Disease):ti,ab,kw OR (Diseases, Metabolic):ti,ab,kw OR (Thesaurismosis):ti,ab,kw (Word variations have been searched) |
| #16 | (Thesaurismoses):ti,ab,kw OR (Lipid Metabolism Disorders):ti,ab,kw OR (Lipid Metabolism Disorder):ti,ab,kw OR (Metabolism Disorder, Lipid):ti,ab,kw OR (Metabolism Disorders, Lipid):ti,ab,kw (Word variations have been searched) |
| #17 | (Glucose Metabolism Disorders):ti,ab,kw OR (Disorder, Glucose Metabolism):ti,ab,kw OR (Disorders, Glucose Metabolism):ti,ab,kw OR (Metabolism Disorder, Glucose):ti,ab,kw OR (Metabolism Disorders, Glucose):ti,ab,kw (Word variations have been searched) |
| #18 | (Motilin-Related Peptide):ti,ab,kw OR (Motilin Related Peptide):ti,ab,kw OR (Orexins):ti,ab,kw OR (Hypocretin):ti,ab,kw OR (Orexin):ti,ab,kw (Word variations have been searched) |
| #19 | (Orexin A):ti,ab,kw OR (Hypocretin 1):ti,ab,kw OR (Orexin B):ti,ab,kw OR (Leptin):ti,ab,kw OR (Ob Gene Product):ti,ab,kw (Word variations have been searched) |
| #20 | (Gene Product, Ob):ti,ab,kw OR (Ob Protein):ti,ab,kw OR (Obese Gene Product):ti,ab,kw OR (Gene Product, Obese):ti,ab,kw OR (Obesity):ti,ab,kw (Word variations have been searched) |
| #21 | (Body Weight):ti,ab,kw OR (Body Weights):ti,ab,kw OR (Weight, Body):ti,ab,kw OR (Weights, Body):ti,ab,kw OR (Waist Circumference):ti,ab,kw (Word variations have been searched) |
| #22 | (Circumferences, Waist):ti,ab,kw OR (Circumference, Waist):ti,ab,kw OR (Waist Circumferences):ti,ab,kw (Word variations have been searched) |
| #23 | (#15) OR (16) OR (#17) OR (#18) OR (#19) OR (#20) OR (#21) OR (#22) |
| #24 (5126 records) | (#14) AND (#23) |
| **Search** | **Web of Science** |
| #1 | Sleep Wake Disorders (Topic) or Disorder, Sleep Wake (Topic) or Disorders, Sleep Wake (Topic) or Sleep Wake Disorder (Topic) or Wake Disorder, Sleep (Topic) or Wake Disorders, Sleep (Topic) or REM Sleep Parasomnias (Topic) or Parasomnia, REM Sleep (Topic) or REM Sleep Parasomnia (Topic) or Parasomnias, REM Sleep (Topic) or Rapid Eye Movement Sleep Parasomnias (Topic) or Sleep, REM, Parasomnias (Topic) or Sleep-Wake Transition Disorders (Topic) or Sleep-Wake Transition Disorder (Topic) or Sleep Wake Transition Disorders (Topic) or Transition Disorder, Sleep-Wake (Topic) or Sleep-Wake Transitional Disorders (Topic) or Sleep-Wake Transitional Disorder (Topic) or Sleep Arousal Disorders (Topic) or Arousal Disorder, Sleep (Topic) or Sleep Arousal Disorder (Topic) or Arousal Disorders, Sleep (Topic) or Confusional Arousals (Topic) or Arousal, Confusional (Topic) or Sleep Disorders, Intrinsic (Topic) or Intrinsic Sleep Disorder (Topic) or Sleep Disorder, Intrinsic (Topic) or Intrinsic Sleep Disorders (Topic) or Sleep State Misperception (Topic) or Sleep State misperception (Topic) or Sleep Paralysis (Topic) or Paralysis, Sleep (Topic) or REM Sleep Behavior Disorder (Topic) or Behavior Disorder, Rapid Eye Movement Sleep (Topic) or Behavior Disorder, REM (Topic) or Behavior Disorders, REM (Topic) or REM Behavior Disorders (Topic) or Rapid Eye Movement Sleep Behavior Disorder (Topic) or Sleep Disorders, Circadian Rhythm (Topic) or Circadian Rhythm Sleep Disorder (Topic) or Sleep-Wake Schedule Disorders (Topic) or Sleep Wake Schedule Disorders (Topic) or Sleep-Wake Cycle Disorders (Topic) or Sleep Wake Cycle Disorders (Topic) or Sleep Apnea Syndromes (Topic) or Apnea Syndrome, Sleep (Topic) or Apnea Syndromes, Sleep (Topic) or Sleep Apnea Syndrome (Topic) or Apnea, Sleep (Topic) or Apneas, Sleep (Topic) or Sleep Apnea, Obstructive (Topic) or Apneas, Obstructive Sleep (Topic) or Obstructive Sleep Apneas (Topic) or Sleep Apneas, Obstructive (Topic) or Apnea, Obstructive Sleep (Topic) or Sleep Apnea Hypopnea Syndrome (Topic) or Sleep Deprivation (Topic) or Deprivation, Sleep (Topic) or Insufficient Sleep Syndrome (Topic) or Insufficient Sleep Syndromes (Topic) or Syndrome, Insufficient Sleep (Topic) or REM Sleep Deprivation (Topic) |
| #2 | Metabolic Diseases (Topic) or Disease, Metabolic (Topic) or Metabolic Disease (Topic) or Diseases, Metabolic (Topic) or Thesaurismosis (Topic) or thesaurismosis (Topic) or Lipid Metabolism Disorders (Topic) or Lipid Metabolism Disorder (Topic) or Metabolism Disorder, Lipid (Topic) or Metabolism Disorders, Lipid (Topic) or Glucose Metabolism Disorders (Topic) or Disorder, Glucose Metabolism (Topic) or Disorders, Glucose Metabolism (Topic) or Metabolism Disorder, Glucose (Topic) or Metabolism Disorders, Glucose (Topic) or Glucose Metabolic Disorder (Topic) or Ghrelin (Topic) or Appetite-Regulating Hormone (Topic) or Appetite Regulating Hormone (Topic) or Gastric matrp (Topic) or Motilin-Related Peptide (Topic) or Motilin Related Peptide (Topic) or orexin (Topic) or Hypocretin (Topic) or Orexin (Topic) or Orexin A (Topic) or Hypocretin 1 (Topic) or Orexin B (Topic) or Ob Gene Product (Topic) or Gene Product, Ob (Topic) or Ob Protein (Topic) or Obese Gene Product (Topic) or Gene Product, Obese (Topic) or Obesity (Topic) or Body Weight (Topic) or Body Weights (Topic) or Weight, Body (Topic) or Weights, Body (Topic) or Waist Circumference (Topic) or Circumferences, Waist (Topic) or Circumference, Waist (Topic) or Waist Circumferences (Topic) |
| #3 (33072 records) | (#1) AND #2 |
| **Total (178938 records)** | |
| **Manual search** | |
| No additionally added results. | |

**PICOS for the meta-analysis.**

| **Population** | Participants (of all ages and both genders) with all types of disordered sleep, both artificial (experimental cohort, such as sleep restriction and sleep deprivation) and intrinsic, and both within clinical diagnosis and self-reported, as the primary and main diagnosis (report). |
| --- | --- |
| **Intervention** | Without any intervention, both pharmacological and non-pharmacological (if the study was not designed as an observational cohort, only baseline data were extracted). |
| **Comparison** | Healthy participants. |
| **Outcome** | Laboratory and physical examination results of metabolic parameters, including glucose metabolic indexes, lipid metabolic indexes, appetite-related hormone levels, and obesity-related indexes. |
| **Study design** | Clinical cohorts, including clinical controlled trials/randomized controlled trials, and observational trials/intervene trials with baseline data of metabolic parameters or with metabolic parameters before intervention provided. |
