# Supplementary material
Source: Research Square preprint supplement (doi:10.21203/rs.3.rs-9056648/v1)
Supplement: Supplementary file 4 [file 7d56ed46e99e16785f92414c.doc]

**Supplementary Appendix 6**

**NOTE**: In these two tables, any additional information that might contribute to metabolic changes correlated with disordered sleep, or measurement of sleep quantity or quality. Part of the information is presented in figures while others are presented in narrative description. All of the information origins from the published paper and supplementary materials. Reference and the details of groups see **Supplementary Appendix 6**.

**Additional information extracted from the enrolled case-control designed studies.**

| **Author** | **Title** | **Additional metabolism-related indexes** | **Additional information** |
| --- | --- | --- | --- |
| Robertson MD | Effects of three weeks of mild sleep restriction implemented in the home environment on multiple metabolic and endocrine markers in healthy young men. | (Body index) Fasting adiponectin, mean ± SD  EG: 8545 ± 2954 ng/mL  CG: 6592 ± 2478 ng/mL  (Glucose metabolic index) HOMA-IR, mean ± SD:  EG: 1.8 ± 0.5  CG: 1.9 ± 0.5 | *NA* |
| Spaeth AM | Resting Metabolic Rate Varies by Race and by Sleep Duration | (Body index) Fat-free mass, mean ± SD:  EG: 52.2 ± 11.5 kg  CG: 52.6 ± 9.8 kg | 1. Sleep duration before the study, mean ± SD:   EG: 7 hours 55 minutes ± 26.4 minutes  CG: 7 hours 57 minutes ± 30.6 minutes   1. In sleep-restricted subjects, Resting metabolic rate was lower on the fifth day of sleep restriction compared to BL1 (*P* = 0.032, dz = 0.37, raw change: -41.72 kcal/day, -2.6%) and higher on the first day of recovery compared to the fifth day of sleep restriction (*P* < 0.001, dz = 0.84, raw change: 60.02 kcal/day, +3.8%) but did not differ between the first day of baseline and the first day of recovery (*P* = 0.24) . 2. Relative to Caucasians (N = 14), African Americans (N = 22) exhibited comparable daily caloric intake but a lower resting metabolic rate (*P* = 0.043) and higher respiratory quotient (*P* = 0.013) regardless of sleep duration. 3. Sleep-restricted subjects consumed more calories per day (F1,42 = 5.30, *P* = 0.026), a higher percentage of calories from fat (F1,42 = 5.25, *P* = 0.027) and a lower percentage of calories from protein (F1,42 = 7.71, *P* = 0.008), on average, from the second day of baseline to the forth day of sleep restriction (the day prior to the metabolic measurement) than control subjects on corresponding days (the second day of baseline to the forth day of controlled condition) (covariates: age, gender, and race). |
| Vgontzas AN | Sleep apnea and daytime sleepiness and fatigue: relation to visceral obesity, insulin resistance, and hypercytokinemia | (Other index - inflammatory factor) TNFα, mean ± SE:  EG: 3.21 ± 0.18 pg/mL  CG1: 2.82 ± 0.11 pg/mL  CG2: 2.66 ± 0.17 pg/mL  (Other index - inflammatory factor) IL-6, mean ± SE:  EG: 3.03 ± 0.38 pg/mL  CG1: 2.30 ± 0.39 pg/mL  CG2: 1.49 ± 0.22 pg/mL  (Body index) Total body fat area, mean ± SE:  EG: 697.8 ± 46.6 cm2  CG1: 589.0 ± 67.8 cm2  (Body index) Subcutaneous fat area, mean ± SE:  EG: 360.7 ± 40.7 cm2  CG: 368.5 ± 55.9 cm2  (Body index) Visceral fat area, mean ± SE:  EG: 337.1 ± 24.7 cm2  CG: 220.5 ± 24.8 cm2 | *NA* |
| Terzi R | Bone mineral density and changes in bone metabolism in patients with obstructive sleep apnea syndrome | (Body index) Lumbar L1-L4 BMD, mean ± SD:  EG: 1.08 ± 0.15 g/cm2  CG: 1.16 ± 0.13 g/cm2  (Body index) Femur neck BMD, mean ± SD:  EG: 1.04 ± 0.15 g/cm2  CG: 1.15 ± 0.10 g/cm2  (Other index - hormone) PTH, mean ± SD:  EG: 59.02 ± 20.98 pg/mL  CG: 52.28 ± 19.51 pg/mL  (Other index - hormone) TSH, mean ± SD:  EG: 1.27 ± 0.62 μU/mL  CG: 1.3 ± 0.52 μU/mL | *NA* |
| Rizzi CF | 1 | (Body index) Hip circumference (cm), mean ± SE:  EG: 94.5 ± 5.0  CG: 92.4 ± 3.9  (Other index - blood biochemistry) Creatinine, mean ± SE:  EG: 0.8 ± 0.1 mg/dL  CG: 0.8 ± 0.1 mg/dL  (Other index - blood biochemistry) Urea, mean ± SE:  EG: 31.1 ± 7.6 mg/dL  CG: 31.1 ± 7.7 mg/dL  (Other index - blood biochemistry) Sodium, mean ± SE:  EG: 140.9 ± 2.5 mmol/L  CG: 141.5 ± 2.4 mmol/L    (Other index - blood biochemistry) Potassium, mean ± SE:  EG: 4.1 ± 0.4 mmol/L  CG: 4.2 ± 0.3 mmol/L | 1)Scores of sleep scales  Epworth sleepiness scale, mean ± SE:  EG: 8.7 ± 5.2  CG: 8.0 ± 4.6  2)Blood routine examination  Hemoglobin, mean ± SE:  EG: 15.1 ± 1.5 g/dL  CG: 14.9 ± 1.2 g/dL  Leukocytes, mean ± SE:  EG: 6.6 ± 2.2*103/μL  CG: 6.1 ± 1.8*103/μL |
| Sforza E | Sex differences in obstructive sleep apnoea in an elderly French population | (Body index) Total lean mass, mean ± SE:  EG-male: 55.4 ± 5.6 kg  EG-female: 39.5 ± 5.2 kg  (Body index) Total fat mass, mean ± SE:  EG (male): 20.4 ± 4.9 kg  EG (female): 24.5 ± 0.6 kg  (Body index) Central fat mass (kg), mean ± SE:  EG (male): 13.2 ± 3.2 kg  EG (female): 13.1 ± 3.1 kg  (Body index) Peripheral fat mass, mean ± SE:  EG-male: 7.2 ± 2.0 kg  EG-female: 11.6 ± 4.0 kg  (Body index) Bone mineral content, mean ± SE:  EG-male: 2.49 ± 2.7 kg  EG-female: 1.86 ± 2.9 kg | 1)OSA-related index  AHI, mean ± SE:  EG (male): 36.1 ± 1.4 events/h  EG (female): 27.1 ± 0.8 events/h  Oxygen desaturation index, mean ± SE:  EG (male): 15.6 ± 0.9 events/h  EG (female): 10.8 ± 0.5 events/h  Mean Sa,O₂, mean ± SE:  EG (male): 95.0 ± 0.1 %  EG (female): 95.3 ± 0.1 %  Minimal Sa,O₂, mean ± SE:  EG (male): 88.6 ± 0.3 %  EG (female): 89.9 ± 0.3 %  Time with Sa,O₂, mean ± SE:  EG (male): 2.70 ± 0.53 <90% min  EG (female): 1.95 ± 0.13 <90% min  Autonomic arousal index, mean ± SE:  EG (male): 22.0 ± 0.9 /h  EG (female): 18.2 ± 0.5 /h  2)Scores of sleep scales  Epworth Sleepiness Scale (ESS), mean ± SE：  EG (male): 6.7 ± 0.3  EG (female): 5.3 ± 0.3  CG (male): 5.7 ± 0.4  CG (female): 4.9 ± 0.2  the Questionnaire of Self-Evaluated Depressive Symptomatology (QD2A), mean ± SE：  EG (male): 1.9 ± 0.1  EG (female): 3.2 ± 0.2  CG (male): 1.5 ± 0.2  CG (female): 2.8 ± 0.2  Goldberg scale, mean ± SE：  EG (male): 2.5 ± 0.2  EG (female): 4.0 ± 0.2  CG (male): 2.3 ± 0.2  CG (female): 3.9 ± 0.2  Berlin Questionnaire, mean ± SE：  EG (male): 42.1  EG (female): 37.8  CG (male): 20.9  CG (female): 19.9 |
| Cintra F | Cysteine: a potential biomarker for obstructive sleep apnea | (Body index) Abdominal circumference, mean ± SD:  EG: 102.44 ± 17.34 cm  CG: 91.33 ± 11.37 cm  (Lipid metabolic index) VLDL, mean ± SD:  EG: 28.12 ± 13.57 mg/dL  CG: 26.88 ± 12.64 mg/dL  (Other index - blood biochemistry) Brain natriuretic peptide, mean ± SD:  EG: 15.77 ± 13.4 pg/mL  CG: 13.90 ± 8.71 pg/mL  (Other index - blood biochemistry) Hcy, mean ± SD:  EG: 15.11 ± 3.76 µmol/L  CG: 15.43 ± 3.58 µmol/L  (Other index - blood biochemistry) Cys, mean ± SD:  EG: 490.16 ± 67.00 µmol/L  CG: 439.81 ± 76.12 µmol/L | 1. Scores of sleep scale   Epworth sleepiness scale, mean ± SD:  EG: 11.24 ± 5.76  CG: 9.15 ± 5.55   1. Blood routine examination   Hemoglobin, mean ± SD:  EG: 15.03 ± 1.26 g/dL  CG: 14.94 ± 1.15 g/dL  Hemosedimentation velocity, mean ± SD:  EG: 12.98 ± 10.14 mm²/h  CG: 13.80 ± 14.81 mm²/h   1. Blood vitamin   Vitamin B6, mean ± SD:  EG: 32.53 ± 9.17 nmol/L  CG: 31.90 ± 8.52 nmol/L  Vitamin B12, mean ± SD:  EG: 447.00 ± 146.37 pg/mL  CG: 425.83 ± 212.23 pg/mL  Folate, mean ± SD:  EG: 13.55 ± 4.62 ng/mL  CG: 14.31 ± 5.22 ng/mL |
| Tseng PH | A Higher Proportion of Metabolic Syndrome in Chinese Subjects with Sleep-Disordered Breathing: A Case-Control Study Based on Electrocardiogram-Derived Sleep Analysis | (Other index - blood biochemistry) Uric acid, mean ± SD:  EG: 6.6 ± 1.5 mg/dL  CG: 6.1 ± 1.3 mg/dL  (Other index - inflammatory factor) hs-CRP, mean ± SD:  EG: 0.28 ± 0.43 mg/L  CG: 0.14 ± 0.15 mg/L | 1) Scores of sleep scale  PSQI, mean ± SD:  EG: 6.20 ± 3.77  CG: 7.84 ± 3.94  2) Blood pressure  Systolic blood pressure: mean ± SD:  EG: 128.8 ± 18.0 mmHg  CG: 122.1 ± 14.0 mmHg  Diastolic blood pressure: mean ± SD:  EG: 76.7 ± 0.9 mmHg  CG: 73.3 ± 10.0 mmHg |
| Martin RA | The effect of acute aerobic exercise on hemostasis in obstructive sleep apnea | *NA* | 1) Oxygen uptake index  VO2, mean ± SE:  EG: 25.29 ± 5.19 mL/kg/min  CG: 28.97 ± 7.99 mL/kg/min  Heart rate, mean ± SE:  EG: 128.83 ± 19.35 bpm  CG: 136.83 ± 23.48 bpm  2) Thrombus-related indicators  Factor VIII antigen from pre- to post-exercise, mean ± SE:  EG: 1.06 ± 0.37 to 1.15 ± 0.31 IU/mL  CG: 0.84 ± 0.30 to 1.13 ± 0.42 IU/mL  tPA antigen in response to exercise, mean ± SE:  EG: 1.74 ± 1.89 to 2.87 ± 2.87 ng/mL  CG: 1.18 ± 0.81 to 1.91 ± 1.36 ng/mL  tPA activity responses to exercise, mean ± SE:  EG: 0.07 ± 0.43 to 0.77 ± 0.47 IU/mL  CG: 0.08 ± 0.06 to 0.78 ± 0.35 IU/mL  PAI-1 activity in response to exercise, mean ± SE:  EG: 21.35 ± 10.65 to 24.85 ± 18.83 IU/mL  CG: 8.70 ± 9.11 to 8.15 ± 7.90 IU/mL |
| Kritikou I | Sleep apnoea, sleepiness, inflammation and insulin resistance in middle-aged males and females | Data for males are presented after controlling for lipid-lowering medication and smoking status. Data for females are presented after controlling for age, body mass index (BMI), lipid-lowering medication, hypertension and smoking status. Data in parentheses are from the subgroup of females matched for BMI after controlling for age, lipid-lowering medication, hypertension and smoking status (N = 13 controls and N = 16 apnoeics).  (Glucose metabolic index) HOMA index, mean ± SE:  EG (male): 4.00 ± 0.37；  EG (female): 3.35 ± 0.40 (3.89 ± 0.39)  CG (male): 2.37 ± 0.40，  CG (female): 3.59 ± 0.37 (3.81 ± 0.44)  (Body index) Adiponectin, mean ± SE:  EG (male): 4.75 ± 0.54 ng/mL  EG (female): 10.84 ± 1.57 (8.96 ± 1.52) ng/mL  CG (male): 4.89 ± 0.60 ng/mL  CG (female): 12.68 ± 1.44 (11.63 ± 1.71) ng/mL  (Other index - inflammatory factor) log hs-CRP, mean ± SE:  EG (male): 0.09 ± 0.08 ng/mL  EG (female): 0.45 ± 0.08 (0.47 ± 0.09) ng/mL  CG (male): -0.18 ± 0.08 ng/mL  CG (female): -0.04 ± 0.08 (0.04 ± 0.10) ng/mL  (Other index - inflammatory factor) log IL-6, mean ± SE:  EG (male): 0.48 ± 0.03 pg/mL  EG (female): 0.53 ± 0.04 (0.55 ± 0.04) pg/mL  CG (male): 0.37 ± 0.03 pg/mL  CG (female): 0.44 ± 0.04 (0.43 ± 0.05) pg/mL  (Other index - inflammatory factor) tumour necrosis factor receptor-1, mean ± SE:  EG (male): 929.57 ± 32.45 pg/mL  EG (female): 994.24 ± 47.00 (1033.06 ± 53.05) pg/mL  CG (male): 8881.25 ± 34.23 pg/mL  CG (female): 1092.77 ± 44.07 (1144.24 ± 63.25) pg/mL | 1) Sleep index  Multiple sleep latency test, mean ± SD:  EG-male: 10.25 ± 0.99 min  EG-female: 12.43 ± 1.06 min  CG-male: 13.54 ± 1.08 min  CG-female: 10.69 ± 0.99 min  2) Scores of sleep scale  ESS, mean ± SD:  EG-male: 10.85 ± 5.44；  EG-female: 11.12 ± 1.06  CG-male: 7.42 ± 5.00，  CG-female: 7.52 ± 0.97 |
| Kritikou I | Sleep apnoea and the hypothalamic-pituitary-adrenal axis in men and women: effects of continuous positive airway pressure | *NA* | 1) Scale scores  Beck Anxiety Inventory (log), mean ± SD:  EG: 0.36 ± 0.36  CG: 0.38 ± 0.40  Beck Depression Inventory II (log), mean ± SD:  EG: 0.59 ± 0.40  CG: 0.39 ± 0.38 |
| Abelleira R | Diabetes and obstructive sleep apnoea: A case-control study | (Other index - hormone) TSH, mean ± SD:  EG: 2.4 ± 1.6 mIU/l  CG: 2.7 ± 1.6 mIU/l | 1) Scores of sleep scale  ESS, mean ± SD:  EG: 10.5 ± 3.1  CG: 6.6 ± 2.9  2) Others  Charlson Comorbidity Index, mean ± SD:  EG: 0.6 ± 1.3  CG: 0.6 ± 1.1 |
| Bermingham KM | Exploring the relationship between social jetlag with gut microbial composition, diet and cardiometabolic health, in the ZOE /PREDICT 1 cohort | (Body index) Waist to hip ratio, mean ± SD:  EG: 0.85 ± 0.09  CG: 0.84 ± 0.08  (Other index - inflammatory factor) Glycoprotein acetyls, mean ± SD:  EG: 1.35 ± 0.19 mmol/L  CG: 1.32 ± 0.18 mmol/L  (Other index - inflammatory factor) IL-6, mean ± SD:  EG: 0.95 ± 2.62 ng/L  CG: 0.69 ± 0.65 ng/L | *NA* |
| Beitinger PA | Glucose tolerance in patients with narcolepsy | (Other index - hormone) TSH, mean ± SD:  EG: 1.5 ± 0.8 μU/mL  CG: 1.5 ± 2.9 μU/mL | *NA* |
| van Holst RJ | Aberrant Food Choices after Satiation in Human Orexin-Deficient Narcolepsy Type 1 | *NA* | 1) Scores of sleep scales  ESS, mean ± SD:  EG1: 15.91 ± 4.58  EG2: 15.92 ± 3.45  CG: 6.94 ± 3.74  PSQI, mean ± SD:  EG1: 11.83 ± 4.76  EG2: 10.92 ± 5.61  CG: 6.94 ± 3.74  Barratt Impulsiveness Scale-11, mean ± SD:  EG1: 65.96 ± 8.5  EG2: 64.96 ± 9.43  CG: 56.63 ± 15.61  2) Scores of dietary scale  Dutch Healthy Diet Food Frequency Questionnaire, mean ± SD:  EG1: 65.96 ± 8.5  EG2: 64.96 ± 9.43  CG: 52.84 ± 11.09  3) Other dietary-related figures (extracted from the questionnaire used in the original study)  Sweet calories consumed during satiety phase:  EG1: 373  CG: 475  Salty calories consumed during satiety phase:  EG1: 420  CG: 650  Hunger rating before task:  EG1: 6.72  CG: 7.28  Hunger rating after task:  EG1: 4.70  CG: 2.55  Wanting of sweet snack before task:  EG1: 7.07  CG: 6.31  Wanting of sweet snack after task:  EG1: 3.58  CG: 3.06  Wanting of salty snack before task:  EG1: 5.78  CG: 7.16  Wanting of salty snack after task:  EG1: 3.50  CG: 2.43  Spontaneous snack intake (calories):  EG1: 399.48  CG: 120.06  Spontaneous sweet snack intake (calories):  EG1: 238.72  CG: 87.79  Spontaneous salty snack intake (calories)  EG1: 160.47  CG: 32.51 |

**Abbreviations**: *NA*: not applicable; EG: experimental group (group with participants diagnosed with disordered sleep); CG: controlled group (group with participants without any reported diagnosis of disordered sleep); HOMA-IR: Homeostasis Model Assessment of Insulin Resistance; BMD: bone mineral density; TSH: thyroid stimulating hormone; PTH: parathyroid hormone; CRP: C-reactive protein; ESS: Epworth Sleepiness Scale; PSQI: Pittsburgh sleep quality index; SD: standard deviation; SE: standard error.

**Additional information extracted from the enrolled crossover designed studies.**

| **Author** | **Title** | **Possible indexes that might affect metabolism** | **Additional information of research findings extracted from the original publication** |
| --- | --- | --- | --- |
| Schüssler P | Nocturnal ghrelin, ACTH, GH and cortisol secretion after sleep deprivation in humans | (Other index - hormone) Growth hormone:  1st half Maximum:  EG: 18.01 ± 9.16 ng/mL  CG: 12.10 ± 10.05 ng/mL  2nd half of the night:  EG: 2.01 ± 1.45 ng/mL  CG: 1.66 ± 0.85 ng/mL  Total night:  EG: 18.01 ± 9.16 ng/mL  CG: 12.10 ± 10.05 ng/mL  (Other index - hormone) ACTH AUC values (ACTH Maximum; log-transformed):  1st half Maximum:  EG: 2656 ± 624 pg/mL  CG: 2466 ± 429 pg/mL  2nd half of the night:  EG: 7432 ± 2244 pg/mL  CG: 5597 ± 1985 pg/mL  Total night:  EG: 10088 ± 2661 pg/mL  CG: 8064 ± 2320 pg/mL | *NA* |
| Schmid SM | Sleep loss alters basal metabolic hormone secretion and modulates the dynamic counterregulatory response to hypoglycemia | (Glucose metabolic index) Glucagon, mean ± SE:  EG: 130 ± 18 pg/mL  CG: 155 ± 18 pg/mL  (Glucose metabolic index) Lactate, mean ± SE:  EG: 0.99 ± 0.11 mmol/L  CG: 1.19 ± 0.15 mmol/L  (Glucose metabolic index) C-peptide, mean ± SE:  EG: 1.03 ± 0.15 ng/mL  CG: 1.42 ± 0.21 ng/mL  (Other index - hormone) ACTH, mean ± SE:  EG: 44.5 ± 13.6 pg/mL  CG: 42.2 ± 7.3 pg/mL  (Other index - hormone) Growth hormone, mean ± SE:  EG: 2.0 ± 1.5 µg/L  CG: 0.6 ± 0.3 µg/L  (Lipid metabolic index) β-hydroxybutyrate, mean ± SE:  EG: 0.87 ± 0.21 mg/dl  CG: 1.60 ± 0.63 mg/dl | *NA* |
| Pejovic S | Leptin and hunger levels in young healthy adults after one night of sleep loss | (Lipid metabolic index) Difference of the mean 24-h adiponectin levels (postdeprivation minus baseline); mean ± SE: 3.23 ± 1.76 ng/mL | *NA* |
| Benedict C | Diurnal rhythm of circulating nicotinamide phosphoribosyltransferase (Nampt/visfatin/PBEF): impact of sleep loss and relation to glucose metabolism | (Lipid metabolic index) Visfatin, mean ± SE:  EG: 0.64 ± 0.03 ng/mL  CG: 0.49 ± 0.02 ng/mL | *NA* |
| Costa RJ | The effects of two nights of sleep deprivation with or without energy restriction on immune indices at rest and in response to cold exposure | *NA* | 1) Saliva-related index  Saliva flow rate compared with 0 h:  EG1 (48h): -38%  EG2 (48h): -50%  Saliva S-IgA concentration compared with 0 h:  EG1 (48h): +40%  EG2 (24h): +34%  EG2 (48h): +44% |
| Wilms B | Sleep Loss Disrupts Morning-to-Evening Differences in Human White Adipose Tissue Transcriptome | (Glucose metabolic index) HOMA-%β was reduced after sleep loss (*P* = 0.043 for ANOVA main effect “condition”)  (Glucose metabolic index) Fasting C-peptide was reduced in the morning after sleep loss (*P* = 0.002 for ANOVA main effect “condition”)  (Other index - inflammatory factor) IL-8 remained unchanged (*P* ≥ 0.490 for ANOVA main effect “condition”)  (Other index - cytokines) Resistin remained unchanged (*P* ≥ 0.490 for ANOVA main effect “condition”) | 1) Vitamin-related factor  Retinol-binding protein tended to be elevated after sleep loss (*P* = 0.070 for ANOVA main effect “condition”) |
| Reynolds AC | Impact of five nights of sleep restriction on glucose metabolism, leptin and testosterone in young adult men | (Glucose metabolic index) HOMA, mean ± SE:  EG: 12.1 ± 1.3  CG: 8.3 ± 0.8  (Other index - hormone) Total testosteron, mean ± SE:  EG: 14.0 ± 0.5 nmol/L  CG: 14.7 ± 0.5 nmol/L  (Other index - hormone) ACTH, mean ± SE:  EG: 22.1 ± 1.1 pg/mL  CG: 21.5 ± 1.6 pg/mL  (Other index - hormone) Sex hormone-binding globulin, mean ± SE:  EG: 27.9 ± 1.0 nmol/L  CG: 31.4 ± 1.2 nmol/L | *NA* |
| Rao MN | Subchronic sleep restriction causes tissue-specific insulin resistance | (Glucose metabolic index) Insulin AUC, mean ± SE:  EG: 259 ± 40  CG: 215 ± 27  (Glucose metabolic index) Whole-body insulin sensitivity, mean ± SE:  EG: 6.88 ± 0.80 mg/kg•min•μIU/mL  CG: 9.20 ± 1.77 mg/kg•min•μIU/mL  (Glucose metabolic index) Peripheral insulin sensitivity, mean ± SE:  EG: 7.23 ± 0.94 mg/kg•min•μIU/mL  CG: 10.21 ± 2.06 mg/kg•min•μIU/mL  (Lipid metabolic index) Circulating levels of non-esterified fatty acid were 62% higher during sleep restriction (*P* = 0.007).  (Lipid metabolic index) β-OH butyrate, a measure of hepatic fat oxidation, was 55% higher with sleep restriction (*P* = 0.067).    (Other index - hormone) 24-hour urine free cortisol secretion increased by 21% (*P =* 0.04) | 1) Energy metabolic index  Respiratory quotient, mean ± SD:  EG: 0.75 ± 0.02  CG: 0.81 ± 0.02 |
| O'Keeffe M | No effects of short-term sleep restriction, in a controlled feeding setting, on lipid profiles in normal-weight adults | *NA* | 1) Blood pressure and heart rate  Systolic blood pressure after 5 days, mean ± SD:  EG: 107.7 ± 7.8 mmHg  CG: 107.2 ± 7.3 mmHg  Diastolic blood pressure after 5 days, mean ± SD:  EG: 69.1 ± 7.8 mmHg  CG: 68.2 ± 6.2 mmHg  Resting heart rate after 5 days, mean ± SD:  EG: 61.9 ± 8.8 bpm  CG: 60.7 ± 12.5 bpm |
| Liu PY | Clamping Cortisol and Testosterone Mitigates the Development of Insulin Resistance during Sleep Restriction in Men | (Glucose metabolic index) Insulin sensitivity decreased significantly (t180 = -5.50, *P* < 0.001).  (Glucose metabolic index) β cell responsivity (total phi) decreased significantly (t63 = -2.52, *P* = 0.014).  (Glucose metabolic index) The disposition index (the product of Si and total phi) decreased significantly (t50 = -2.66, *P* = 0.010).  (Glucose metabolic index) HOMA-IR was not significant (t64 = 1.48, *P* = 0.144).  (Glucose metabolic index) Insulin clearance (the ratio of AUC of C-peptide over the AUC of insulin) did not change after sleep restriction.  (Glucose metabolic index) C-peptide AUC did not change after sleep restriction.  (Other index - inflammatory factor) IL-6 did not change after sleep restriction.  (Other index - inflammatory factor) hs-CRP was not significant.  (Other index - hormone) Peptide YY did not change after sleep restriction.  (Other index - inflammatory factor) TNFα decreased with sleep restriction (t64 = −2.04, *P* = 0.045).  (Other index - hormone) Testosterone did not change after sleep restriction. | *NA* |
| Killick R | Metabolic and hormonal effects of 'catch-up' sleep in men with chronic, repetitive, lifestyle-driven sleep restriction | (Glucose metabolic index) C-peptide was significantly higher in 6 h compared to 10 h.  (Glucose metabolic index) HOMA-β was significantly higher in 6 h compared to 10 h.  (Glucose metabolic index) HOMA-IR was significantly higher in 6 h compared to 10 h.  (Glucose metabolic index) QUICKI was significantly lower in 6 h compared to 10 h.  (Other index - hormone) Peptide YY increased 12.7 pg/mL (95%CI: 2.1-23.3) in 6 h compared to 10 h.  (Other index - hormone) Fasting morning testosterone levels were significantly lower following 6 h compared to 10 h (2.2nM (0.2, 4.2); *P* = 0.03) . | *NA* |
| Tajiri E | Effect of sleep curtailment on dietary behavior and physical activity: A randomized crossover trial | (Body index) Height:  EG: 158.4 ± 5.6 cm  CG: 158.4 ± 5.7 cm | 1) Dietary-related index  Energy intake:  EG: 8.64 ± 0.82  CG: 8.46 ± 1.28  2) Physical state  Sleepiness AUC:  EG: 69.6 ± 31.7  CG: 42.3 ± 20.1  Fatigue AUC:  EG: 65.2 ± 33.1  CG: 39.3 ± 22.9  3) Appetite-related index  Hunger AUC:  EG: 52.7 ± 22.0  CG: 51.4 ± 16.7 e  Appetiten AUC:  EG: 57.0 ± 27.5  CG: 56.4 ± 21.2  Sweets (desire to eat sweets) AUC:  EG: 45.4 ± 27.8  CG: 49.1 ± 24.4  Fat (desire to eat fat) AUC:  EG: 29.0 ± 22.1  CG: 31.2 ± 17.1 |
| Sweeney EL | Skeletal muscle insulin signaling and whole-body glucose metabolism following acute sleep restriction in healthy males | (Glucose metabolic index) Matsuda index*, mean ± SD:  EG: 3.41 ± 0.51  CG: 4.19 ± 0.71  Matsuda index was 19% lower in EG than CG. | PanPKB activity** during CG was  12.37 ± 1.93 µU/(min•mg) at baseline and was significantly elevated at 30 min (26.67 ± 4.96 µU/(min·mg); *P*=0.007) and 120 min (21.47 ± 2.75 µU/(min•mg); *P*<0.001). PanPKB during EG was 27% higher than CG at baseline (mean difference +3.35 µU/(min•mg); 95% CI: -1.91, 8.61; d = 0.63).  PanPKB activity displayed a mean of a 2.7 fold change from baseline to 30 min in CG whereas the 1.5 fold change during EG tended to be lower (-1.13 difference in fold change; 95% CI: 2.91, 0.65; *P* = 0.098, d = 0.69).  Mean sleep duration, mean ± SD:  CG: 442 ± 78 min  EG: 235 ± 34 min |
| St-Onge MP | Short sleep duration, glucose dysregulation and hormonal regulation of appetite in men and women | (Glucose metabolic index) Glucagon-likepeptide-1, mean ± SD:  EG: 8.1 ± 4.2 pmol/L  CG: 7.8 ± 4.3 pmol/L  (Lipid metabolic index) Adiponectin, mean ± SD:  EG: 10.6 ± 5.6 μg/mL  CG: 11.1 ± 5.2 μg/mL  (Other index - hormone) Peptide YY3-36, mean ± SD:  EG: 56.2 ± 23.5 pg/mL  CG: 57.4 ± 21.1 pg/mL | *NA* |
| Broussard JL | Elevated ghrelin predicts food intake during experimental sleep restriction | (Other index - hormone) 24-h mean pancreatic polypeptide, mean ± SE:  EG: 47.2 ± 4.3 pg/mL  CG: 47.5 ± 4.4 pg/mL  (Other index - hormone) Nocturnal pancreatic polypeptide, mean ± SE:  EG: 31.0 ± 3.1 pg/mL  CG: 29.1 ± 3.1 pg/mL | Neither the meal-related peaks nor the post-meal nadirs were different between EG and CG. |
| Cros J | Impact of sleep restriction on metabolic outcomes induced by overfeeding: a randomized controlled trial in healthy individuals | (Body index) Fat mass, mean ± SE:  EG: 14.9 ± 1.5 %  CG: 14.1 ± 1.7 %  (Glucose metabolic index) Plasma lactate, mean ± SE:  EG: 0.77 ± 0.08 mmol/L  CG: 0.74 ± 0.08 mmol/L  (Lipid metabolic index) Plasma free-fatty acid, mean ± SE:  EG: 0.42 ± 0.06 mmol/L  CG: 0.40 ± 0.05 mmol/L | *NA* |
| Cedernaes J | A single night of partial sleep loss impairs fasting insulin sensitivity but does not affect cephalic phase insulin release in young men | (Glucose metabolic index) HOMA-IR, mean ± SE:  EG:1.77 ± 0.23 [µU/mL*mmol/L ]/ 22.5  CG:1.52 ± 0.23 [µU/mL*mmol/L ]/ 22.5 | *NA* |
| Zuraikat FM | Chronic Insufficient Sleep in Women Impairs Insulin Sensitivity Independent of Adiposity Changes: Results of a Randomized Trial | (Glucose metabolic index) Matsuda index*, mean ± SD:  EG: 6.67 ± 3.55  CG: 5.81 ± 3.04  (Glucose metabolic index) Oral disposition index***, mean ± SD:  EG: 6.08 ± 3.67  CG: 5.86 ± 4.85  (Glucose metabolic index) HOMA-IR:  EG increased: β = 0.30 ± 0.12 (mean ± SE); *P* =0.016  CG: 1.8 ± 1.0 (mean ± SD) | *NA* |
| Qian J | Ghrelin is impacted by the endogenous circadian system and by circadian misalignment in humans | *NA* | 1) Appetite-related index  Hunger and appetite ratings (fasting), mean ± SE:  Hunger:  EG: 52.33 ± 6.63  CG: 58.42 ± 5.19  Fullness:  EG: 21.64 ± 4.07  CG: 21.66 ± 3.43  Desire-strong:  EG: 53.32 ± 7.24  CG: 59.57 ± 5.49  Much:  EG: 57.18 ± 5.79  CG: 61.39 ± 4.25  Sweet:  EG: 31.37 ± 7.05  CG: 36.38 ± 6.76  Starch:  EG: 47.21 ± 8.80  CG: 52.10 ± 7.09  Salty:  EG: 42.07 ± 8.76  CG: 42.56 ± 7.23  Meat:  EG: 49.64 ± 8.05  CG: 50.99 ± 6.15  Dairy:  EG: 46.84 ± 8.46  CG: 45.60 ± 7.78  Vegetable:  EG: 33.82 ± 6.5.97  CG: 35.98 ± 5.06  Fruit:  EG: 46.29 ± 8.25  CG: 49.83 ± 7.00  Hunger and appetite ratings (postprandial), mean ± SE:  Hunger:  EG: 14.15 ± 3.54  CG: 14.15 ± 4.02  Fullness:  EG: 67.46 ± 3.79  CG: 68.56 ± 4.92  Desire-strong:  EG: 14.81 ± 3.75  CG: 14.76 ± 4.13  Much:  EG: 22.14 ± 4.14  CG: 22.25 ± 3.79  Sweet:  EG: 16.94 ± 4.47  CG: 15.99 ± 3.69  Starch:  EG: 21.09 ± 5.97  CG: 15.12 ± 3.84  Salty:  EG: 21.88 ± 6.14  CG: 16.30 ± 3.77  Meat:  EG: 16.95 ± 4.17  CG: 14.72 ± 3.98  Dairy:  EG: 19.59 ± 5.93  CG: 15.15 ± 4.28  Vegetable:  EG: 14.91 ± 4.63  CG: 9.94 ± 2.13  Fruit:  EG: 22.91 ± 6.06  CG: 19.01 ± 4.36 |
| Leproult R | Beneficial impact of sleep extension on fasting insulin sensitivity in adults with habitual sleep restriction | (Glucose metabolic index) After sleep extension, HOMA tended to decrease, and changes in polysomnographic total sleep time and stage N2 tended to be negatively associated with changes in HOMA (*P* = 0.069, *P* = 0.025).  (Glucose metabolic index) After sleep extension, insulin-toglucose ratio tended to decrease, and changes in polysomnographic total sleep time tended to be negatively associated with changes in insulin-toglucose ratio (*P* = 0.009, *P* = 0.003).  (Glucose metabolic index) After sleep extension, QUICKI tended to increase, and changes in polysomnographic total sleep time tended to be positively associated with changes in QUICKI (*P* = 0.002, *P* = 0.004). | *NA* |
| So-ngern A | Effects of Two-Week Sleep Extension on Glucose Metabolism in Chronically Sleep-Deprived Individuals | Results of sleep extension on metabolic parameters, intention-to-treat analysis (n = 21) :  (Glucose metabolic index) AUC glucose (mg/dL·h), mean ± SE:  EG: 253.50 ± 11.90  CG: 261.80 ± 11.90  (Glucose metabolic index) HOMA-IR, mean ± SE:  EG: 1.56 ± 0.18  CG: 1.78 ± 0.18  (Glucose metabolic index) Matsuda index, mean ± SE:  EG: 5.48 ± 0.68  CG: 5.38 ± 0.67  (Glucose metabolic index) Insulinogenic index, mean ± SE:  EG: 1.58 ± 0.25  CG: 1.02 ± 0.25  (Glucose metabolic index) Disposition index, mean ± SE:  EG: 7.75 ± 1.20  CG: 5.14 ± 1.20  Results of sleep extension on metabolic parameters, per-protocol analysis (sleep duration > 6 hours during sleep extension (n = 8)) :  (Glucose metabolic index) AUC glucose (mg/dL·h), mean ± SE:  EG: 272.90 ± 23.0  CG: 271.40 ± 23.0  (Glucose metabolic index) HOMA-IR, mean ± SE:  EG: 1.43 ± 0.21  CG: 1.76 ± 0.21  (Glucose metabolic index) Matsuda index, mean ± SE:  EG: 5.86 ± 1.35  CG: 6.48 ± 1.35  (Glucose metabolic index) Insulinogenic index, mean ± SE:  EG: 1.01 ± 0.13  CG: 0.69 ± 0.13  (Glucose metabolic index) Disposition index, mean ± SE:  EG: 4.95 ± 0.78  CG: 4.69 ± 0.78 | Intention-to-treat analysis:  1) Sleep-related index  Sleep duration, mean ± SE:  EG: 354 ± 41 minutes (extended sleep by 36.0 ± 45.2 min during sleep extension);  CG: 318.7 ± 44 minutes  Sleep efficiency:  EG: 84.8 ± 5.4 %  CG: 86.3 ± 5.2 %  PSQI scores:  EG: 4.33 ± 0.42  CG: 4.81 ± 0.42  ESS scores:  EG: 3.91 ± 0.67  CG: 4.91 ± 0.67  2) Dietary-related index  Daily calorie intake:  EG: 1384 ± 83 kcal  CG: 1257 ± 83 kcal  Per-protocol analysis:  1) Sleep-related index  Sleep duration, mean ± SE:  EG: 396 ± 25 minutes (extended sleep by 60.1 ± 28.5 min during sleep extension);  CG: 335 ± 32 minutes |

*A metric for evaluating overall insulin sensitivity developed by Matsuda and Defronzo, which is calculated based on the blood glucose and insulin levels measured at multiple time points during the oral glucose tolerance test.

**The enzymatic activity of total protein kinase B (PKB/Akt).

***A crucial indicator for evaluating the function of pancreatic beta cells, reflecting the compensatory insulin secretion capacity of beta cells under a specific level of insulin sensitivity.

**Abbreviations**: *NA*: not applicable; EG: experimental group (group with participants diagnosed with disordered sleep); CG: controlled group (group with participants without any reported diagnosis of disordered sleep); ACTH: Adrenocorticotropic hormone; HOMA-IR: Homeostasis Model Assessment of Insulin Resistance; QUICKI: Quantitative Insulin Sensitivity Check Index; CRP: C-reactive protein; ESS: Epworth Sleepiness Scale; PSQI: Pittsburgh sleep quality index; SD: standard deviation; SE: standard error.

1. Rizzi CF, Cintra F, Risso T, et al. Exercise capacity and obstructive sleep apnea in lean subjects. *Chest* 2010; 137(1): 109-14.
