# Supplementary material
Source: Research Square preprint supplement (doi:10.21203/rs.3.rs-9056648/v1)
Supplement: Supplementary file 6 [file c20b421e21b966e254363b1e.pdf]

# **Non-RCT Literature Quality Assessment**

Based on Newcastle-Ottawa Scale (NOS)

15 Studies Assessment Report

**Table 1: Complete NOS Assessment Results for 15 Studies**

| No. | Study           | Study design | Selection | Comparability | Outcome | Summary | Quality grade |
|-----|-----------------|--------------|-----------|---------------|---------|---------|---------------|
| 1   | Beitinger 2012  | Group        | ★★★       | ★★            | ★★★     | 8/9     | High          |
| 2   | Vgontzas 2000   | Group        | ★★★★      | ★★            | ★★      | 8/9     | High          |
| 3   | Abelleira 2024  | Group        | ★★★       | ★★            | ★★★     | 8/9     | High          |
| 4   | Terzi 2016      | Group        | ★★★       | ★★            | ★★      | 7/9     | Medium        |
| 5   | Sforza 2015     | Group        | ★★★★      | ★★            | ★★★     | 9/9     | High          |
| 6   | Birmingham 2025 | Group        | ★★★       | ★★            | ★★★     | 8/9     | High          |
| 7   | Martin 2017     | Group        | ★★★       | ★★            | ★★      | 7/9     | Medium        |
| 8   | Tseng 2017      | Group        | ★★★       | ★★            | ★★★     | 8/9     | High          |
| 9   | Sforza 2011     | Group        | ★★★★      | ★★            | ★★★     | 9/9     | High          |
| 10  | Buxton 2012     | Crossover    | ★★★★      | ★★            | ★★★     | 9/9     | High          |
| 11  | Leproult 2015   | Crossover    | ★★★       | ★★            | ★★★     | 8/9     | High          |
| 12  | Reynolds 2012   | Crossover    | ★★★       | ★★            | ★★      | 7/9     | Medium        |
| 13  | Schüssler 2006  | Crossover    | ★★★       | ★             | ★★      | 6/9     | Medium        |
| 14  | Cintra 2011     | Crossover    | ★★★       | ★★            | ★★★     | 8/9     | High          |
| 15  | van Holst 2016  | Crossover    | ★★★       | ★★            | ★★      | 7/9     | Medium        |

**Table 2: Selection Domain (Maximum 4 stars)**

| Study           | Representativeness | Non-exposed Group Selection | Exposure Ascertainment | Outcome Not Present | Score |
|-----------------|--------------------|-----------------------------|------------------------|---------------------|-------|
| Beitinger 2012  | ★                  | ★                           | ★                      | -                   | 3/4   |
| Vgontzas 2000   | ★                  | ★                           | ★                      | ★                   | 4/4   |
| Abelleira 2024  | ★                  | ★                           | ★                      | -                   | 3/4   |
| Terzi 2016      | ★                  | ★                           | ★                      | -                   | 3/4   |
| Sforza 2015     | ★                  | ★                           | ★                      | ★                   | 4/4   |
| Birmingham 2025 | ★                  | ★                           | ★                      | -                   | 3/4   |
| Martin 2017     | ★                  | ★                           | ★                      | -                   | 3/4   |
| Tseng 2017      | ★                  | ★                           | ★                      | -                   | 3/4   |
| Sforza 2011     | ★                  | ★                           | ★                      | ★                   | 4/4   |
| Buxton 2012     | ★                  | ★                           | ★                      | ★                   | 4/4   |
| Leproult 2015   | ★                  | ★                           | ★                      | -                   | 3/4   |
| Reynolds 2012   | ★                  | ★                           | ★                      | -                   | 3/4   |
| Schüssler 2006  | ★                  | ★                           | ★                      | -                   | 3/4   |
| Cintra 2011     | ★                  | ★                           | ★                      | -                   | 3/4   |
| van Holst 2016  | ★                  | ★                           | ★                      | -                   | 3/4   |

**Table 3: Comparability Domain (Maximum 2 stars)**

| Study           | Main Confounder Control | Other Confounder Control  | Score |
|-----------------|-------------------------|---------------------------|-------|
| Beitinger 2012  | ★ (BMI matched)         | ★ (Age, sex)              | 2/2   |
| Vgontzas 2000   | ★ (BMI matched)         | ★ (Age, sex)              | 2/2   |
| Abelleira 2024  | ★ (BMI, age, sex)       | ★ (Comorbidities)         | 2/2   |
| Terzi 2016      | ★ (Age, BMI)            | ★ (Smoking)               | 2/2   |
| Sforza 2015     | ★ (Age matched)         | ★ (Sex, BMI)              | 2/2   |
| Birmingham 2025 | ★ (Age, BMI)            | ★ (Multiple covariates)   | 2/2   |
| Martin 2017     | ★ (Age, BMI, sex)       | ★ (Activity level)        | 2/2   |
| Tseng 2017      | ★ (Age, sex)            | ★ (1:2 matching)          | 2/2   |
| Sforza 2011     | ★ (Age matched)         | ★ (Sex, community-based)  | 2/2   |
| Buxton 2012     | ★ (Within-subject)      | ★ (Controlled conditions) | 2/2   |
| Leproult 2015   | ★ (Within-subject)      | ★ (Sleep duration)        | 2/2   |
| Reynolds 2012   | ★ (Within-subject)      | ★ (Diet controlled)       | 2/2   |
| Schüssler 2006  | ★ (Within-subject)      | - (Small n)               | 1/2   |
| Cintra 2011     | ★ (Age, sex matched)    | ★ (BMI, CPAP trial)       | 2/2   |
| van Holst 2016  | ★ (Age, BMI matched)    | ★ (Disease controls)      | 2/2   |

**Table 4: Outcome Domain (Maximum 3 stars)**

| Study           | Assessment Method | Follow-up Duration  | Adequacy of Follow-up | Score |
|-----------------|-------------------|---------------------|-----------------------|-------|
| Beitinger 2012  | ★ (Validated)     | ★ (Follow-up)       | ★ (>80%)              | 3/3   |
| Vgontzas 2000   | ★ (Lab measures)  | - (Cross-sectional) | ★ (Complete)          | 2/3   |
| Abelleira 2024  | ★ (Validated)     | ★ (Follow-up)       | ★ (>90%)              | 3/3   |
| Terzi 2016      | ★ (Validated)     | - (Cross-sectional) | ★ (Complete)          | 2/3   |
| Sforza 2015     | ★ (Validated)     | ★ (Follow-up)       | ★ (>95%)              | 3/3   |
| Bermingham 2025 | ★ (Validated)     | ★ (Follow-up)       | ★ (>85%)              | 3/3   |
| Martin 2017     | ★ (Validated)     | - (Cross-sectional) | ★ (Complete)          | 2/3   |
| Tseng 2017      | ★ (Validated)     | ★ (Follow-up)       | ★ (>90%)              | 3/3   |
| Sforza 2011     | ★ (Validated)     | ★ (Follow-up)       | ★ (>95%)              | 3/3   |
| Buxton 2012     | ★ (Lab measures)  | ★ (Controlled)      | ★ (Complete)          | 3/3   |
| Leproult 2015   | ★ (Lab measures)  | ★ (Controlled)      | ★ (Complete)          | 3/3   |
| Reynolds 2012   | ★ (Lab measures)  | ★ (Controlled)      | ★ (Complete)          | 2/3   |
| Schüssler 2006  | ★ (Validated)     | - (Short follow-up) | ★ (Complete)          | 2/3   |
| Cintra 2011     | ★ (Lab measures)  | ★ (Controlled)      | ★ (Complete)          | 3/3   |
| van Holst 2016  | ★ (Validated)     | - (Cross-sectional) | ★ (Complete)          | 2/3   |

### Table 5: Summary Statistics

| Category                                    | Value      |
|---------------------------------------------|------------|
| Total Studies                               | 15         |
| Group Design                                | 9 (60%)    |
| Crossover Design                            | 6 (40%)    |
| High Quality (7-9 stars)                    | 12 (80%)   |
| Medium Quality (4-6 stars)                  | 3 (20%)    |
| Low Quality (0-3 stars)                     | 0 (0%)     |
| Mean NOS Score                              | 7.7/9      |
| Studies with Full Selection Score (4/4)     | 4 (26.7%)  |
| Studies with Full Comparability Score (2/2) | 14 (93.3%) |
| Studies with Full Outcome Score (3/3)       | 9 (60%)    |

**Table 6: NOS Quality Assessment Criteria**

| Domain        | Criterion                            | Rating                                       | Maximum Score |
|---------------|--------------------------------------|----------------------------------------------|---------------|
| Selection     | Representativeness of exposed cohort | Truly representative (★) vs. Somewhat repre  | Max 1 star    |
| Selection     | Selection of non-exposed cohort      | Drawn from same community (★) vs. Differ     | Max 1 star    |
| Selection     | Ascertainment of exposure            | Secure record (★) vs. Structured interview ( | Max 1 star    |
| Selection     | Outcome not present at start         | Yes (★) vs. No (-)                           | Max 1 star    |
| Comparability | Control for main factor              | Yes (★) vs. No (-)                           | Max 1 star    |
| Comparability | Control for additional factors       | Yes (★) vs. No (-)                           | Max 1 star    |
| Outcome       | Assessment of outcome                | Independent blind assessment (★) vs. Reco    | Max 1 star    |
| Outcome       | Follow-up duration                   | Long enough for outcomes (★) vs. Not long    | Max 1 star    |
| Outcome       | Adequacy of follow-up                | >80% follow-up (★) vs. <80% or no descrip    | Max 1 star    |
