# Supplementary material
Source: Research Square preprint supplement (doi:10.21203/rs.3.rs-9056648/v1)
Supplement: Supplementary file 7 [file c3542708afd4c45ac729aaa7.doc]

**Supplementary Appendix 2.3**

**Possible Reasons of Quality Risk**

**Sources of Bias and Contributing Factors Summary**

| **Bias Domain** | **Risk Level** | **Key Contributing Factors** |
| --- | --- | --- |
| **Performance Bias** | Predominantly High | (1) No placebo equivalent for sleep; (2) Participants aware of sleep duration; (3) Unmaskable physiological effects; (4) Personnel must enforce protocols; (5) Sham-CPAP limitations |
| **Detection Bias** | Predominantly Low | (1) Objective laboratory measurements; (2) Automated instrumentation; (3) Standardized analytical procedures; (4) Centralized/blinded laboratory analysis |
| **Selection Bias** | Mixed (Low/Unclear) | (1) Inadequate randomization reporting; (2) Allocation concealment not described; (3) Studies with computer-generated sequences rated low risk |
| **Attrition Bias** | Predominantly Low | (1) Low dropout rates; (2) Balanced attrition; (3) Crossover design advantages; (4) Adequate handling of missing data |
| **Reporting Bias** | Mixed (Low/Unclear) | (1) Registered trials rated low risk; (2) Pre-registration era studies rated unclear; (3) Protocol inaccessibility |

**The high prevalence of performance bias reflects the inherent methodological challenges specific to sleep intervention research:**

***(1) Absence of placebo control for sleep manipulation***

Unlike pharmacological trials where placebo controls can effectively blind participants, there is no equivalent "placebo sleep" to simulate deprived, restricted, or extended sleep conditions. Sleep itself cannot be substituted or mimicked by an inert intervention.

***(2) Participants' inevitable awareness of their own sleep status***

Participants are inherently aware of their own sleep duration and timing. They know whether they slept for 4 hours or 8 hours, making it impossible to blind them to the intervention condition.

***(3) Unmaskable physiological experience of sleep loss***

The physiological and psychological consequences of sleep manipulation—including fatigue, increased sleepiness, decreased alertness, mood alterations, and cognitive impairment—are directly experienced by participants and cannot be masked or concealed.

***(4) Personnel's necessary involvement in protocol enforcement***

Research personnel are typically required to actively monitor sleep schedules and ensure protocol compliance. During sleep restriction protocols, staff members must frequently check on participants throughout the night to prevent unintended sleep, making blinding of study personnel impractical.

***(5) Laboratory environment requirements***

In laboratory-based studies, maintaining controlled conditions necessitates that staff members know participants' scheduled sleep and wake times to enforce the protocol, conduct scheduled assessments, and ensure participant safety.

***(6) Limitations of sham interventions in device-based studies***

Although some studies investigating sleep apnea treatment employed sham-CPAP as a control condition, complete blinding remained difficult to achieve. Some participants could distinguish between active and sham treatments based on perceived differences in airflow pressure, as noted in the included studies where participants raised questions about treatment type.
